# Supplementary material for: Ubenimex induces autophagy inhibition and EMT suppression to overcome cisplatin resistance in GC cells by perturbing the CD13/EMP3/PI3K/AKT/NF-κB axis
Source: Aging (Albany NY). 2019 Dec 31;12(1):80–105. doi: 10.18632/aging.102598 (PMC6977684; doi:10.18632/aging.102598)
Supplement: Supplementary Database 2 [file aging-12-102598-s004..xlsx]

## Sheet: diffall.anno
probeset_id	Fold Change	ANOVA p-value	Entrez ID	Gene Symbol	Description	mRNA Accession	mRNA Source	Chromosome	Type
TC0100006437.hg.1	-16.7888	0.000389493	7873	CD13	Alanyl Aminopeptidase, Membrane	NM_001005484; ENST00000335137; OTTHUMT00000003223; uc001aal.1; CCDS30547.1	RefSeq; ENSEMBL; Havana transcript; UCSC Genes; ccdsGene	chr1	coding
TC0100006476.hg.1	-14.4385	0.00384395	4856	EMP3	Epithelial Membrane Protein 3	NM_152486; ENST00000341065; ENST00000342066; ENST00000420190; ENST00000437963; ENST00000455979; ENST00000464948; ENST00000466827; ENST00000474461; ENST00000478729; ENST00000616016; ENST00000616125; ENST00000617307; ENST00000618181; ENST00000618323; ENST00000618779; ENST00000620200; ENST00000622503; BC024295; BC033213; OTTHUMT00000097860; OTTHUMT00000097862; OTTHUMT00000097863; OTTHUMT00000097865;…	RefSeq; ENSEMBL; GenBank; Havana transcript; ccdsGene; circbase; UCSC Genes; lncRNAWiki; NONCODE	chr19	coding
TC0100006675.hg.1	-12.9089	0.00346125	23261	PIK3R1	Phosphatidylinositol 3-kinase regulatory subunit alpha	NM_001199860; NM_001199861; NM_001199862; NM_001199863; NM_003636; NM_172130; ENST00000164247; ENST00000341524; ENST00000352527; ENST00000378083; ENST00000378092; ENST00000378097; ENST00000378111; ENST00000389632; ENST00000428161; ENST00000435937; ENST00000445501; ENST00000458166; ENST00000459822; ENST00000462676; ENST00000472700; ENST00000478098; ENST00000481789; ENST00000493807; ENST00000602612…	RefSeq; ENSEMBL; GenBank; Havana transcript; ccdsGene; UCSC Genes; lncRNAWiki; NONCODE	chr1	coding
TC0100006857.hg.1	-11.5545	0.0245689	79180	AKT1	RAC-alpha serine/threonine-protein kinase	NM_020780; ENST00000294484; ENST00000304391; ENST00000423056; OTTHUMT00000005770; OTTHUMT00000005771; OTTHUMT00000005772; BC172581; CCDS41247.1; hsa_circ_0009849; PTCHD2.aAug10; PTCHD2.cAug10; uc001ash.5; uc009vmz.2; uc057cgg.1; NONHSAT000900; NONHSAT000902	RefSeq; ENSEMBL; Havana transcript; GenBank; ccdsGene; circbase; Ace View; UCSC Genes; lncRNAWiki; NONCODE	chr1	coding
TC0100006787.hg.1	-10.4345	0.00302545	60672	RELA	nuclear factor NF-kappa-B p65 subunit,Transcription factor p65	NM_005026; ENST00000361110; ENST00000377346; ENST00000479223; ENST00000481137; ENST00000484851; ENST00000536656; ENST00000543390; ENST00000628140; BC132919; BC132921; BC144264; BC150297; OTTHUMT00000004235; OTTHUMT00000004237; OTTHUMT00000004238; OTTHUMT00000099298; OTTHUMT00000099299; CCDS104.1; hsa_circ_0002983; hsa_circ_0009653; hsa_circ_0009654; hsa_circ_0009655; hsa_circ_0009656; hsa_circ_00…	RefSeq; ENSEMBL; GenBank; Havana transcript; ccdsGene; circbase; UCSC Genes; lncRNAWiki; NONCODE	chr1	coding
TC0100006516.hg.1	-9.78949	0.00139239	83729	ZEB1	Zinc Finger E-Box Binding Homeobox 1	NM_022834; NM_199121; ENST00000338660; ENST00000471398; ENST00000476993; ENST00000495558; BC059409; OTTHUMT00000008291; OTTHUMT00000008292; OTTHUMT00000008293; OTTHUMT00000008294; CCDS27.1; CCDS28.2; uc001afr.4; uc001afs.4; uc057bfl.1; uc057bfm.1; VWA1.aAug10; VWA1.eAug10	RefSeq; ENSEMBL; GenBank; Havana transcript; ccdsGene; UCSC Genes; Ace View	chr1	coding
TC0X00008210.hg.1	-9.57147	0.000134552	11254	SLC6A14	solute carrier family 6 (amino acid transporter), member 14	NM_007231; ENST00000463626; ENST00000598581; BC093710; BC093712; OTTHUMT00000057986; OTTHUMT00000057987; CCDS14570.1; uc033eru.2; uc065auz.1; NONHSAT138271	RefSeq; ENSEMBL; GenBank; Havana transcript; ccdsGene; UCSC Genes; lncRNAWiki; NONCODE	chrX	coding
TC0100006613.hg.1	-8.95623	0.0190306	7076	VIM	Vimentin,Epididymis Secretory Sperm Binding Protein	NM_014448; ENST00000378371; ENST00000378373; ENST00000378378; ENST00000418137; ENST00000445297; ENST00000464620; ENST00000485984; BC002681; BC051838; OTTHUMT00000001515; OTTHUMT00000001516; OTTHUMT00000001517; OTTHUMT00000001518; OTTHUMT00000001519; OTTHUMT00000324123; OTTHUMT00000324124; uc001aki.3; uc001akj.3; ARHGEF16.fAug10; ARHGEF16.hAug10; CCDS46.2; uc001akg.5; uc009vli.2; uc057bpl.1; uc057…	RefSeq; ENSEMBL; GenBank; Havana transcript; UCSC Genes; Ace View; ccdsGene; lncRNAWiki; NONCODE	chr1	coding
TC0600007377.hg.1	-8.95009	0.00402707	8342	HIST1H2BM	histone cluster 1, H2bm	NM_003521; ENST00000621112; BC066244; BC067486; BC067487; BC067488; BC067489; OTTHUMT00000040157; CCDS4629.1; uc003njo.4	RefSeq; ENSEMBL; GenBank; Havana transcript; ccdsGene; UCSC Genes	chr6	coding
TC01000096.hg.1	-8.89808	0.00263124	83756	ZEB2	Zinc Finger E-Box Binding Homeobox 2	NM_199121; ENST00000338660; ENST00000471398; ENST00000476993; ENST00000495558; BC059409; OTTHUMT00000008291; OTTHUMT00000008292; OTTHUMT00000008293; OTTHUMT00000008294; CCDS27.1; CCDS28.2; uc001afr.4; uc001afs.4; uc057bfl.1; uc057bfm.1; VWA1.aAug10; VWA1.eAug10	RefSeq; ENSEMBL; GenBank; Havana transcript; ccdsGene; UCSC Genes; Ace View	chr1	coding
TC0100006514.hg.1	-8.78879	0.00390511	153090	CDH2	Cadherin 2, Type 1, N-Cadherin (Neuronal)	NM_001146685; ENST00000378821; OTTHUMT00000331012; uc010nyp.2; CCDS57964.1; TMEM88B.aAug10; lnc-VWA1-1:1	RefSeq; ENSEMBL; Havana transcript; UCSC Genes; ccdsGene; Ace View; lncRNAWiki	chr1	coding
TC0100006501.hg.1	-8.49894	0.00393003	57556	BECN1	Coiled-Coil, Moesin-Like BCL2-Interacting Protein	NM_001029885; ENST00000343938; ENST00000464957; ENST00000488011; OTTHUMT00000008742; OTTHUMT00000008743; OTTHUMT00000008744; CCDS30555.1; hsa_circ_0009264; uc001aeo.4; uc057bdo.1; uc057bdp.1	RefSeq; ENSEMBL; Havana transcript; ccdsGene; circbase; UCSC Genes	chr1	coding
TC0100006480.hg.1	-8.43348	0.00333325	2069	BCL-2	Apoptosis regulator Bcl-2	NM_001160184; NM_032129; ENST00000379407; ENST00000379409; ENST00000379410; ENST00000480267; ENST00000491024; BC101386; BC101387; OTTHUMT00000097940; OTTHUMT00000097941; OTTHUMT00000097942; OTTHUMT00000473255; OTTHUMT00000473256; CCDS4.1; CCDS53256.1; PLEKHN1.aAug10; PLEKHN1.bAug10; uc001acd.4; uc001ace.4; uc001acf.4; uc057ayk.1; uc057ayl.1; NONHSAT000217	RefSeq; ENSEMBL; GenBank; Havana transcript; ccdsGene; Ace View; UCSC Genes; lncRNAWiki; NONCODE	chr1	coding
TC0100006483.hg.1	-8.25554	0.00135466	1943	MAP1LC3B	Microtubule Associated Protein 1 Light Chain 3 Beta	NM_005101; ENST00000379389; ENST00000624652; ENST00000624697; BC009507; OTTHUMT00000097989; OTTHUMT00000479384; OTTHUMT00000479385; CCDS6.1; hsa_circ_0009211; ISG15.bAug10; ISG15.cAug10; uc001acj.5; uc057ayq.1; uc057ayr.1	RefSeq; ENSEMBL; GenBank; Havana transcript; ccdsGene; circbase; Ace View; UCSC Genes	chr1	coding
TC0100006571.hg.1	-7.94039	0.0151714	3484	ATG5	Autophagy Related 5	hsa_circ_0000009; kerlabu.aAug10-unspliced	circbase; Ace View	chr1	ncrna
TC0100006499.hg.1	-7.34524	0.00568989	5054	CTNNB1	Catenin (Cadherin-Associated Protein), Beta 1	NM_153339; ENST00000379031; ENST00000463758; ENST00000467712; ENST00000470520; ENST00000493657; BC034304; OTTHUMT00000009438; OTTHUMT00000009439; OTTHUMT00000009440; OTTHUMT00000009441; OTTHUMT00000009442; CCDS20.1; hsa_circ_0009258; uc001aed.4; uc057bbt.1; uc057bbu.1; uc057bbv.1; uc057bbw.1; NONHSAT000277	RefSeq; ENSEMBL; GenBank; Havana transcript; ccdsGene; circbase; UCSC Genes; lncRNAWiki; NONCODE	chr1	coding
TC0600011232.hg.1	-7.20008	0.000557934	3009	HIST1H1B	histone cluster 1, H1b	NM_005322; ENST00000331442; BC069101; BC101581; BC101583; OTTHUMT00000043371; CCDS4635.1; hsa_circ_0001596; uc003njx.4	RefSeq; ENSEMBL; GenBank; Havana transcript; ccdsGene; circbase; UCSC Genes	chr6	coding
TC0100006490.hg.1	-7.093	0.00101066	627	BCL2L1	Bcl-2-like protein 1	NR_038869; ENST00000416774; ENST00000416774.1; OTTHUMT00000002221; uc001acv.4; HG491580.1:1..1620:ncRNA; NONHSAT000249	RefSeq; ENSEMBL; lncRNAWiki; Havana transcript; UCSC Genes; RNACentral; NONCODE	chr1	ncrna
TC0100006862.hg.1	-6.54545	0.0358687	23341	AKT2	AKT serine/threonine kinase 2;PKB beta	NM_018438; ENST00000376753; ENST00000449067; ENST00000474239; BC020880; OTTHUMT00000006332; OTTHUMT00000006333; OTTHUMT00000006334; CCDS133.1; uc001aso.4; uc057cgp.1; uc057cgq.1	RefSeq; ENSEMBL; GenBank; Havana transcript; ccdsGene; UCSC Genes	chr1	coding
TC0100006517.hg.1	-6.48392	0.00486698	3909	HIF1B	Hypoxia Inducible Factor 1 Subunit beta	NM_001039211; ENST00000378785; ENST00000475091; ENST00000484537; OTTHUMT00000001279; OTTHUMT00000099686; OTTHUMT00000100304; uc001aft.2; ATAD3C.aAug10; ATAD3C.bAug10; CCDS44039.1; hsa_circ_0009275; uc057bfn.1; uc057bfo.1	RefSeq; ENSEMBL; Havana transcript; UCSC Genes; Ace View; ccdsGene; circbase	chr1	coding
TC0100006565.hg.1	-5.90385	0.00698907	652	ABCG2	ATP Binding Cassette Subfamily G Member 2	NM_003036; ENST00000378536; ENST00000478223; ENST00000507179; ENST00000508416; OTTHUMT00000004070; OTTHUMT00000100293; OTTHUMT00000366271; OTTHUMT00000366272; BC157082; CCDS39.1; hsa_circ_0007120; hsa_circ_0009371; hsa_circ_0009372; SKI.aAug10; SKI.eAug10; SKI.fAug10; uc001aja.5; uc057blo.1; uc057blp.1; uc057blq.1; chr1_2234416_2236024; NONHSAT000406; NONHSAT000407; NONHSAT000412	RefSeq; ENSEMBL; Havana transcript; GenBank; ccdsGene; circbase; Ace View; UCSC Genes; Guo; lncRNAWiki; NONCODE	chr1	coding
TC0100006624.hg.1	-5.90305	0.0386538	161742	ABCB1	ATP Binding Cassette Subfamily B Member 1	NM_001163724; NM_001288583; ENST00000444870; ENST00000452264; ENST00000561886; OTTHUMT00000009742; OTTHUMT00000009743; OTTHUMT00000431890; CCDS57966.1; hsa_circ_0009419; hsa_circ_0009420; LOC388588.aAug10; uc001akw.6; uc057bqq.1; uc057bqr.1	RefSeq; ENSEMBL; Havana transcript; ccdsGene; circbase; Ace View; UCSC Genes	chr1	coding
TC0100006623.hg.1	-5.89404	0.0358698	53616	ABCC1	ATP Binding Cassette Subfamily C Member 1	NM_152492; ENST00000294600; ENST00000462521; BC112108; BC112112; OTTHUMT00000009740; OTTHUMT00000009741; CCDS50.1; uc001akv.3; uc057bqp.1	RefSeq; ENSEMBL; GenBank; Havana transcript; ccdsGene; UCSC Genes	chr1	coding
TC0800008845.hg.1	-5.8845	0.00236885	4609	MYC	v-myc avian myelocytomatosis viral oncogene homolog	NM_002467; ENST00000259523; ENST00000377970; ENST00000517291; ENST00000520751; ENST00000524013; ENST00000613283; ENST00000621592; BC000141; BC000917; BC058901; OTTHUMT00000250277; OTTHUMT00000250278; OTTHUMT00000380690; OTTHUMT00000380691; OTTHUMT00000380692; OTTHUMT00000476371; CCDS6359.2; hsa_circ_0085533; hsa_circ_0085534; hsa_circ_0085535; MYC.gAug10; uc003ysh.2; uc022bbe.2; uc064qdi.1; uc064…	RefSeq; ENSEMBL; GenBank; Havana transcript; ccdsGene; circbase; Ace View; UCSC Genes; NONCODE	chr8	coding
TC0X00008056.hg.1	-5.57982	0.000439451	9075	CLDN2	claudin 2	NM_001171092; NM_001171095; NM_020384; ENST00000336803; ENST00000540876; ENST00000541806; BC014424; BC071747; OTTHUMT00000057815; CCDS14524.1; uc004emq.2; uc004emt.3; uc022ccc.2	RefSeq; ENSEMBL; GenBank; Havana transcript; ccdsGene; UCSC Genes	chrX	coding
TC0100006620.hg.1	-5.49305	0.03688	301	ABCC2	ATP Binding Cassette Subfamily C Member 2	NM_001126240; NM_001126241; NM_001126242; NM_001204184; NM_001204185; NM_001204186; NM_001204187; NM_001204188; NM_001204189; NM_001204190; NM_001204191; NM_001204192; NM_005427; ENST00000346387; ENST00000354437; ENST00000357733; ENST00000378280; ENST00000378285; ENST00000378288; ENST00000378290; ENST00000378295; ENST00000603362; ENST00000603364; ENST00000604074; ENST00000604194; ENST00000604479;…	RefSeq; ENSEMBL; GenBank; Havana transcript; UCSC Genes; ccdsGene; Ace View; lncRNAWiki; NONCODE	chr1	coding
TC0100006524.hg.1	-5.43435	0.00346769	27289	HMGB1	High Mobility Group Box 1	NM_001170686; NM_001170687; NM_001170688; NM_001170689; NM_080875; NR_033183; ENST00000355826; ENST00000378708; ENST00000378712; ENST00000463492; ENST00000464570; ENST00000467597; ENST00000470373; ENST00000473511; ENST00000477990; ENST00000479659; ENST00000483015; ENST00000486072; ENST00000487053; ENST00000489635; ENST00000502470; ENST00000503789; ENST00000504599; ENST00000505370; ENST00000505820…	RefSeq; ENSEMBL; GenBank; Havana transcript; ccdsGene; Ace View; UCSC Genes; lncRNAWiki; NONCODE	chr1	coding
TC0100006502.hg.1	-5.43433	0.0863979	5228	ZNRD1	Zinc Ribbon Domain Containing 1	NM_152228; ENST00000339381; OTTHUMT00000008493; CCDS30556.1; uc010nyk.3	RefSeq; ENSEMBL; Havana transcript; ccdsGene; UCSC Genes	chr1	coding
TC0100006761.hg.1	-4.98782	0.00256476	26270	NKAP	NFKB activating protein	NM_001215; NM_001270500; NM_001270501; NM_001270502; ENST00000377436; ENST00000377442; ENST00000377443; ENST00000476083; ENST00000480186; ENST00000549778; BC034350; OTTHUMT00000004911; OTTHUMT00000004912; OTTHUMT00000004913; OTTHUMT00000407378; OTTHUMT00000407379; OTTHUMT00000407380; CA6.aAug10; CA6.cAug10; CA6.dAug10; CCDS30578.1; CCDS57970.1; CCDS57971.1; uc001apm.5; uc009vmn.5; uc031plc.2; uc0…	RefSeq; ENSEMBL; GenBank; Havana transcript; Ace View; ccdsGene; UCSC Genes	chr1	coding
TC1500007463.hg.1	-4.568	0.00564856	145741	C2CD4A	C2 calcium-dependent domain containing 4A	NM_207322; ENST00000355522; OTTHUMT00000416008; uc002ahf.4; CCDS32258.1	RefSeq; ENSEMBL; Havana transcript; UCSC Genes; ccdsGene	chr15	coding
TC0600014083.hg.1	-4.33662	0.00571969	8969	HIST1H2AG	histone cluster 1, H2ag	NM_021064; ENST00000359193; BC016677; OTTHUMT00000040137; CCDS4619.1; uc003niw.4	RefSeq; ENSEMBL; GenBank; Havana transcript; ccdsGene; UCSC Genes	chr6	coding
TC1700008677.hg.1	-4.29397	0.00744268	27092	CACNG4	calcium channel, voltage-dependent, gamma subunit 4	NM_014405; ENST00000262138; BC034532; OTTHUMT00000447036; CCDS11667.1; uc002jft.3	RefSeq; ENSEMBL; GenBank; Havana transcript; ccdsGene; UCSC Genes	chr17	coding
TC1200007653.hg.1	-4.18558	0.0053888	3164	NR4A1	nuclear receptor subfamily 4, group A, member 1	NM_001202233; NM_001202234; NM_002135; NM_173157; ENST00000243050; ENST00000360284; ENST00000394824; ENST00000394825; ENST00000478250; ENST00000545748; ENST00000546842; ENST00000547206; ENST00000548232; ENST00000548733; ENST00000548977; ENST00000549102; ENST00000550082; ENST00000550339; ENST00000550557; ENST00000550582; ENST00000550763; ENST00000553200; ENST00000562373; ENST00000564201; ENST00000…	RefSeq; ENSEMBL; GenBank; ccdsGene; circbase; UCSC Genes; lncRNAWiki; NONCODE; Havana transcript	chr12	coding
TC0900006968.hg.1	-4.10321	0.0076397	27290	SPINK4	serine peptidase inhibitor, Kazal type 4	NM_014471; ENST00000379721; ENST00000379725; BC110068; OTTHUMT00000052035; OTTHUMT00000052036; CCDS6536.1; uc003zsh.4; uc064som.1	RefSeq; ENSEMBL; GenBank; Havana transcript; ccdsGene; UCSC Genes	chr9	coding
TC0100015701.hg.1	-3.88615	0.000255826	333932; 126961	HIST2H3A; HIST2H3C	histone cluster 2, H3a; histone cluster 2, H3c	NM_001005464; NM_021059; ENST00000369158; OTTHUMT00000033697; BC153074; CCDS30848.1; uc001esv.4; BC074969; BC130635; BC130637	RefSeq; ENSEMBL; Havana transcript; GenBank; ccdsGene; UCSC Genes	chr1	coding
TC2200006985.hg.1	-3.78041	0.0639338		PITPNB	Memczak2013 ANTISENSE, coding, INTERNAL, intronic best transcript NM_012399	hsa_circ_0001214	circbase	chr22	ncrna
TC0100014652.hg.1	-3.6998	0.0179621		ZZZ3	Transcript Identified by AceView, Entrez Gene ID(s) 26009	ZZZ3.sAug10	Ace View	chr1	ncrna
TC0600011136.hg.1	-3.66013	0.00495483	8339	HIST1H2BG	histone cluster 1, H2bg	NM_003518; ENST00000541790; OTTHUMT00000040109; CCDS4594.1; hsa_circ_0007953; uc003ngz.4	RefSeq; ENSEMBL; Havana transcript; ccdsGene; circbase; UCSC Genes	chr6	coding
TC0100009877.hg.1	-3.65734	0.000736541	333932	HIST2H3A	histone cluster 2, H3a	ENST00000403683; OTTHUMT00000033454; NM_001005464_2; NM_021059_2; BC074969_2; BC130635_2; BC130637_2; BC153074_2; CCDS30850.1; uc001esy.4	ENSEMBL; Havana transcript; RefSeq; GenBank; ccdsGene; UCSC Genes	chr1	coding
TC0100009183.hg.1	-3.64461	0.000116475	54873	PALMD	palmdelphin	NM_017734; ENST00000263174; ENST00000496843; ENST00000605497; ENST00000605613; ENST00000615664; BC012570; OTTHUMT00000029672; OTTHUMT00000029673; OTTHUMT00000468886; OTTHUMT00000468887; CCDS758.1; hsa_circ_0013273; hsa_circ_0013274; PALMD.aAug10; uc001dsg.4; uc057ipj.1; uc057ipk.1; uc057ipl.1; uc057ipm.1; NONHSAT004753	RefSeq; ENSEMBL; GenBank; Havana transcript; ccdsGene; circbase; Ace View; UCSC Genes; lncRNAWiki; NONCODE	chr1	coding
TC0100015696.hg.1	-3.59764	0.000109904	440689	HIST2H2BF	histone cluster 2, H2bf	NM_001024599; NM_001161334; ENST00000369167; ENST00000420462; ENST00000469483; ENST00000545683; ENST00000620458; BC110793; OTTHUMT00000033453; OTTHUMT00000099690; OTTHUMT00000478081; OTTHUMT00000478082; uc010pbj.2; CCDS30846.1; CCDS53359.1; ENST00000420462.1; HIST2H2BF.bAug10; HIST2H2BF.eAug10; uc001esr.5; uc057kli.1; uc057kll.1; uc057klm.1; NONHSAT006248	RefSeq; ENSEMBL; GenBank; Havana transcript; UCSC Genes; ccdsGene; lncRNAWiki; Ace View; NONCODE	chr1	coding
TC1500007619.hg.1	-3.58492	0.066094	4091	SMAD6	SMAD family member 6	NM_005585; NR_027654; ENST00000288840; ENST00000557916; ENST00000558937; ENST00000559931; ENST00000612349; BC012986; OTTHUMT00000256953; OTTHUMT00000417451; OTTHUMT00000417452; OTTHUMT00000417453; OTTHUMT00000474051; CCDS10221.1; hsa_circ_0036004; hsa_circ_0036005; hsa_circ_0036006; hsa_circ_0036007; uc002aqf.4; uc059koh.1; uc059koi.1; uc059koj.1; uc059kok.1	RefSeq; ENSEMBL; GenBank; Havana transcript; ccdsGene; circbase; UCSC Genes	chr15	coding
TC0100015477.hg.1	-3.5554	0.000115268	83998	REG4	regenerating islet-derived family, member 4	NM_001159352; NM_001159353; NM_032044; ENST00000256585; ENST00000354219; ENST00000369401; ENST00000530654; BC017089; OTTHUMT00000033674; OTTHUMT00000033675; OTTHUMT00000033677; OTTHUMT00000384138; uc001eig.3; CCDS53354.1; CCDS906.1; REG4.bAug10; REG4.dAug10; uc001eif.4; uc001eih.2; uc057jvx.1	RefSeq; ENSEMBL; GenBank; Havana transcript; UCSC Genes; ccdsGene; Ace View	chr1	coding
TC1200008176.hg.1	-3.48616	0.00560935	8549	LGR5	leucine-rich repeat containing G protein-coupled receptor 5	NM_001277226; NM_001277227; NM_003667; NR_110596; ENST00000266674; ENST00000536515; ENST00000540815; ENST00000547310; ENST00000549015; ENST00000550851; BC096324; BC096325; BC096326; BC099650; OTTHUMT00000404744; OTTHUMT00000404745; OTTHUMT00000404746; OTTHUMT00000404747; OTTHUMT00000404748; OTTHUMT00000404749; CCDS61194.1; CCDS61195.1; CCDS9000.1; hsa_circ_0027571; LGR5.eAug10; LGR5.hAug10; uc001…	RefSeq; ENSEMBL; GenBank; Havana transcript; ccdsGene; circbase; Ace View; UCSC Genes; lncRNAWiki; NONCODE	chr12	coding
TC1500007062.hg.1	-3.48607	0.0131497	1159; 548596	CKMT1B; CKMT1A	creatine kinase, mitochondrial 1B; creatine kinase, mitochondrial 1A	NM_020990; BC001926; BC006467; BC108652; BC121001; BC121002; OTTHUMT00000133147; OTTHUMT00000133148; OTTHUMT00000315931; OTTHUMT00000315932; OTTHUMT00000315933; OTTHUMT00000315934; OTTHUMT00000315935; OTTHUMT00000317307; OTTHUMT00000317308; OTTHUMT00000317309; OTTHUMT00000317310; OTTHUMT00000317311; OTTHUMT00000471420; uc001zsc.3; CCDS10097.1; CKMT1B.uAug10; hsa_circ_0035015; hsa_circ_0035016; hs…	RefSeq; GenBank; Havana transcript; UCSC Genes; ccdsGene; Ace View; circbase; ENSEMBL; lncRNAWiki; NONCODE	chr15	coding
TC0600007273.hg.1	-3.46588	0.000615838	3008	HIST1H1E	histone cluster 1, H1e	NM_005321; ENST00000304218; BC096168; BC096169; BC096170; BC099632; OTTHUMT00000040084; CCDS4586.1; uc003ngq.4	RefSeq; ENSEMBL; GenBank; Havana transcript; ccdsGene; UCSC Genes	chr6	coding
TC0600007380.hg.1	-3.45732	0.00137899	8332; 8341	HIST1H2AL; HIST1H2BN	histone cluster 1, H2al; histone cluster 1, H2bn	NM_003511; NM_003520; ENST00000396980; ENST00000449538; ENST00000606613; ENST00000612898; ENST00000613174; BC069306; BC101411; BC101412; BC101413; BC112072; OTTHUMT00000040160; OTTHUMT00000043840; OTTHUMT00000471044; OTTHUMT00000471045; CCDS4633.1; CCDS4634.1; HIST1H2BN.aAug10-unspliced; hsa_circ_0001595; uc003njt.2; uc003nju.2; uc003njv.4; uc003njw.4; uc063mke.1; uc063mkf.1; ENST00000629628; BC1…	RefSeq; ENSEMBL; GenBank; Havana transcript; ccdsGene; Ace View; circbase; UCSC Genes; lncRNAWiki; NONCODE	chr6	coding
TC0200014672.hg.1	-3.45036	0.00667437	4929	NR4A2	nuclear receptor subfamily 4, group A, member 2	NM_006186; ENST00000339562; ENST00000406048; ENST00000409108; ENST00000409572; ENST00000417764; ENST00000417972; ENST00000421709; ENST00000424077; ENST00000426264; ENST00000429376; BC009288; BC066890; CCDS2201.1; uc002tyx.5; uc002tyz.5; uc010zcg.2; uc061osi.1; uc061osj.1; uc061osk.1; uc061osl.1; uc061osm.1; uc061osn.1; uc061oso.1; NONHSAT075046; NONHSAT075047; OTTHUMT00000254909; OTTHUMT000003326…	RefSeq; ENSEMBL; GenBank; ccdsGene; UCSC Genes; lncRNAWiki; NONCODE; Havana transcript	chr2	coding
TC0100006548.hg.1	-3.43894	0.000475888	23411	ATG12	Autophagy Related 12	NM_000815; ENST00000378585; BC033801; OTTHUMT00000098493; CCDS36.1; uc001aip.3	RefSeq; ENSEMBL; GenBank; Havana transcript; ccdsGene; UCSC Genes	chr1	coding
TC1500007067.hg.1	-3.43516	0.000538782	548596	CKMT1A	creatine kinase, mitochondrial 1A	NM_001015001; OTTHUMT00000133135; OTTHUMT00000133136; OTTHUMT00000133137; OTTHUMT00000133138; OTTHUMT00000133139; OTTHUMT00000133217; OTTHUMT00000133218; uc001zsn.3; BC001926_2; BC006467_2; BC108652_2; BC121001_2; BC121002_2; CCDS32217.1; CKMT1A.pAug10; hsa_circ_0035023; hsa_circ_0035024; uc059imb.1; uc059imc.1; uc059imd.1; uc059ime.1; uc059imf.1; uc059img.1; uc059imh.1; ENST00000411750; ENST0000…	RefSeq; Havana transcript; UCSC Genes; GenBank; ccdsGene; Ace View; circbase; ENSEMBL; lncRNAWiki; NONCODE	chr15	coding
TC0300009890.hg.1	-3.36182	0.12838	57110	HRASLS	HRAS-like suppressor	NM_020386; ENST00000264735; ENST00000416012; BC048095; OTTHUMT00000343020; OTTHUMT00000343021; CCDS3303.2; uc003fta.5; uc062rlt.1	RefSeq; ENSEMBL; GenBank; Havana transcript; ccdsGene; UCSC Genes	chr3	coding
TC1700012076.hg.1	-3.33575	0.00132698	396	ARHGDIA	Rho GDP dissociation inhibitor (GDI) alpha	NM_001185077; NM_001185078; NM_001301240; NM_001301241; NM_001301242; NM_001301243; NM_004309; NR_125441; ENST00000269321; ENST00000400721; ENST00000541078; ENST00000578351; ENST00000579121; ENST00000580033; ENST00000580685; ENST00000581876; ENST00000582309; ENST00000582520; ENST00000582984; ENST00000583111; ENST00000583499; ENST00000583791; ENST00000583868; ENST00000584397; ENST00000584461; BC00…	RefSeq; ENSEMBL; GenBank; Havana transcript; UCSC Genes; Ace View; ccdsGene; circbase; lncRNAWiki; NONCODE	chr17	coding
TC0600011124.hg.1	-3.30965	5.63179e-05	8358	HIST1H3B	histone cluster 1, H3b	NM_003537; ENST00000621411; BC069133; BC096132; BC096133; BC096134; BC099630; OTTHUMT00000040077; CCDS4573.1; uc003nfs.2	RefSeq; ENSEMBL; GenBank; Havana transcript; ccdsGene; UCSC Genes	chr6	coding
TC0600007290.hg.1	-3.30772	0.00528958	8345	HIST1H2BH	histone cluster 1, H2bh	NM_003524; ENST00000619466; BC096116; BC096117; BC096118; BC096119; OTTHUMT00000040110; CCDS4601.1; uc003nhh.4	RefSeq; ENSEMBL; GenBank; Havana transcript; ccdsGene; UCSC Genes	chr6	coding
TC1700010625.hg.1	-3.22565	0.00691823	84951	TNS4	tensin 4	NM_032865; ENST00000254051; ENST00000394072; ENST00000497303; ENST00000582747; BC018706; OTTHUMT00000257154; OTTHUMT00000257155; OTTHUMT00000257156; OTTHUMT00000447523; CCDS11368.1; hsa_circ_0043554; hsa_circ_0043555; hsa_circ_0043556; hsa_circ_0043557; hsa_circ_0043558; hsa_circ_0043559; hsa_circ_0043560; hsa_circ_0043561; hsa_circ_0043562; hsa_circ_0043563; hsa_circ_0043564; hsa_circ_0043565; h…	RefSeq; ENSEMBL; GenBank; Havana transcript; ccdsGene; circbase; UCSC Genes; Guo; lncRNAWiki; NONCODE	chr17	coding
TC0500008890.hg.1	-3.21614	0.000975752	5098; 26025; 8641; 9708; 56114; 56106; 56105; 56113; 56112; 56111; 56110; 56109; 56108; 56107; 56104; 56103; 56102; 56101; 56100; 56099; 56098; 56097	PCDHGC3; PCDHGA12; PCDHGB4; PCDHGA8; PCDHGA1; PCDHGA10; PCDHGA11; PCDHGA2; PCDHGA3; PCDHGA4; PCDHGA5; PCDHGA6; PCDHGA7; PCDHGA9; PCDHGB1; PCDHGB2; PCDHGB3; PCDHGB5; PCDHGB6; PCDHGB7; PCDHGC4; PCDHGC5	protocadherin gamma subfamily C, 3; protocadherin gamma subfamily A, 12; protocadherin gamma subfamily B, 4; protocadherin gamma subfamily A, 8; protocadherin gamma subfamily A, 1; protocadherin gamma subfamily A, 10; protocadherin gamma subfamily A, 11; protocadherin gamma subfamily A, 2; protocadherin gamma subfamily A, 3; protocadherin gamma subfamily A, 4; protocadherin gamma subfamily A, 5; …	NM_002588; NM_003735; NM_003736; NM_014004; NM_018912; NM_018913; NM_018914; NM_018915; NM_018916; NM_018917; NM_018918; NM_018919; NM_018920; NM_018921; NM_018922; NM_018923; NM_018924; NM_018925; NM_018926; NM_018927; NM_018928; NM_018929; NM_031993; NM_032009; NM_032011; NM_032053; NM_032054; NM_032086; NM_032087; NM_032088; NM_032089; NM_032090; NM_032091; NM_032092; NM_032094; NM_032095; NM_…	RefSeq; ENSEMBL; GenBank; Havana transcript; UCSC Genes	chr5	coding
TC0100015707.hg.1	-3.02197	0.010843	8370; 554313	HIST2H4A; HIST2H4B	histone cluster 2, H4a; histone cluster 2, H4b	NM_003548; ENST00000579512; ENST00000612061; ENST00000621520; OTTHUMT00000477866; OTTHUMT00000477867; OTTHUMT00000477868; NM_001034077_2; BC093969_2; BC112193_2; BC153063_2; CCDS30851.1; HIST2H4B.eAug10; uc001etb.4; uc031uxt.2; uc057klu.1; hsa_circ_0013979	RefSeq; ENSEMBL; Havana transcript; GenBank; ccdsGene; Ace View; UCSC Genes; circbase	chr1	coding
TC0600007284.hg.1	-3.01788	0.00046	8367	HIST1H4E	histone cluster 1, H4e	NM_003545; ENST00000615164; OTTHUMT00000040104; CCDS4593.1; hsa_circ_0001588; uc003ngy.4	RefSeq; ENSEMBL; Havana transcript; ccdsGene; circbase; UCSC Genes	chr6	coding
TC1800007508.hg.1	-3.01018	0.00593652		TNFRSF11A	Transcript Identified by AceView, Entrez Gene ID(s) 8792	TNFRSF11A.dAug10-unspliced	Ace View	chr18	ncrna
TC1100013109.hg.1	-2.98067	0.0696807	57476	GRAMD1B	GRAM domain containing 1B	NM_001286563; NM_001286564; NM_020716; ENST00000322282; ENST00000450171; ENST00000456860; ENST00000525945; ENST00000529432; ENST00000529750; ENST00000532581; ENST00000534764; ENST00000632815; ENST00000633087; BC105741; BC105931; BC105932; BC107480; OTTHUMT00000387403; OTTHUMT00000387404; OTTHUMT00000387405; OTTHUMT00000387406; OTTHUMT00000387407; OTTHUMT00000387408; OTTHUMT00000387409; OTTHUMT000…	RefSeq; ENSEMBL; GenBank; Havana transcript; ccdsGene; Ace View; circbase; UCSC Genes; Guo; lncRNAWiki; NONCODE	chr11	coding
TC0500006436.hg.1	-2.95192	0.107008		PLEKHG4B	Zhang2013 ALT_ACCEPTOR, ALT_DONOR, coding, INTERNAL, intronic best transcript NM_052909	hsa_circ_0092371	circbase	chr5	ncrna
TC0800011148.hg.1	-2.94535	0.0179102	9134	CCNE2	cyclin E2	NM_057749; ENST00000308108; ENST00000396133; ENST00000517487; ENST00000519889; ENST00000520509; ENST00000521809; ENST00000523476; ENST00000524224; ENST00000611101; BC007015; BC020729; OTTHUMT00000379808; OTTHUMT00000379810; OTTHUMT00000379812; OTTHUMT00000379813; OTTHUMT00000379814; OTTHUMT00000379815; OTTHUMT00000379816; CCDS6264.1; CCNE2.iAug10; hsa_circ_0008608; hsa_circ_0084955; uc003yhc.4; u…	RefSeq; ENSEMBL; GenBank; Havana transcript; ccdsGene; Ace View; circbase; UCSC Genes; Guo; lncRNAWiki; NONCODE	chr8	coding
TC1000007641.hg.1	-2.91864	6.21253e-05	22943	DKK1	dickkopf WNT signaling pathway inhibitor 1	NM_012242; ENST00000373970; ENST00000467359; ENST00000476752; ENST00000494277; BC001539; OTTHUMT00000048098; OTTHUMT00000048099; OTTHUMT00000048100; OTTHUMT00000048101; CCDS7246.1; hsa_circ_0018414; hsa_circ_0018415; uc001jjr.4; uc057thk.1; uc057thl.1; uc057thm.1; NONHSAT013423; NONHSAT013424	RefSeq; ENSEMBL; GenBank; Havana transcript; ccdsGene; circbase; UCSC Genes; lncRNAWiki; NONCODE	chr10	coding
TC0700009352.hg.1	-2.90463	0.0119798	6916	TBXAS1	thromboxane A synthase 1 (platelet)	NM_001061; NM_001130966; NM_001166253; NM_001166254; NM_030984; ENST00000263552; ENST00000336425; ENST00000411653; ENST00000414041; ENST00000414508; ENST00000416849; ENST00000422328; ENST00000425687; ENST00000438104; ENST00000448866; ENST00000455353; ENST00000458722; ENST00000462053; ENST00000462275; ENST00000469630; ENST00000473948; ENST00000474763; ENST00000476637; ENST00000481440; ENST00000492…	RefSeq; ENSEMBL; GenBank; Havana transcript; ccdsGene; Ace View; UCSC Genes; lncRNAWiki; NONCODE	chr7	coding
TC0400011957.hg.1	-2.87774	0.0172235		MAML3	Memczak2013 ALT_ACCEPTOR, ALT_DONOR, coding, INTERNAL, intronic best transcript NM_018717	hsa_circ_0001443	circbase	chr4	ncrna
TC0100014910.hg.1	-2.8772	0.0516	7049	TGFBR3	transforming growth factor beta receptor III	NM_001195683; NM_001195684; NM_003243; NR_036634; ENST00000212355; ENST00000370399; ENST00000417833; ENST00000465892; ENST00000468996; ENST00000470600; ENST00000525962; ENST00000529608; ENST00000532540; ENST00000533089; ENST00000533370; BC126116; BC136295; OTTHUMT00000027926; OTTHUMT00000027973; OTTHUMT00000027974; OTTHUMT00000027975; OTTHUMT00000027976; OTTHUMT00000382307; OTTHUMT00000382308; OT…	RefSeq; ENSEMBL; GenBank; Havana transcript; ccdsGene; circbase; UCSC Genes; lncRNAWiki; NONCODE	chr1	coding
TC0200012404.hg.1	-2.87299	0.0187027	678	ZFP36L2	ZFP36 ring finger protein-like 2	NM_006887; ENST00000282388; ENST00000620081; BC005010; OTTHUMT00000250513; CCDS1811.1; hsa_circ_0054291; uc002rsv.5; uc061iql.1	RefSeq; ENSEMBL; GenBank; Havana transcript; ccdsGene; circbase; UCSC Genes	chr2	coding
TC0X00006801.hg.1	-2.86931	0.192506	254158	CXorf58	chromosome X open reading frame 58	NM_001169574; NM_152761; ENST00000379211; ENST00000435707; BC117344; BC117346; BC144007; OTTHUMT00000056071; OTTHUMT00000056072; CCDS14209.1; CXorf58.aAug10; uc004daz.2; uc064yje.1	RefSeq; ENSEMBL; GenBank; Havana transcript; ccdsGene; Ace View; UCSC Genes	chrX	coding
TC1200007641.hg.1	-2.85939	0.0163828	6334	SCN8A	sodium channel, voltage gated, type VIII alpha subunit	NM_001177984; NM_014191; ENST00000354534; ENST00000355133; ENST00000545061; ENST00000546961; ENST00000548086; ENST00000550891; ENST00000551216; ENST00000599343; ENST00000627620; ENST00000627665; OTTHUMT00000404370; OTTHUMT00000404371; OTTHUMT00000404372; OTTHUMT00000404373; OTTHUMT00000404374; OTTHUMT00000404375; OTTHUMT00000481599; OTTHUMT00000481600; OTTHUMT00000481601; CCDS44891.1; CCDS53794.1…	RefSeq; ENSEMBL; Havana transcript; ccdsGene; circbase; Ace View; UCSC Genes; lncRNAWiki; NONCODE	chr12	coding
TC2200009364.hg.1	-2.85768	0.00265859	1375	CPT1B	carnitine palmitoyltransferase 1B (muscle)	NM_001145134; NM_001145135; NM_001145137; NM_004377; NM_152245; NM_152246; ENST00000312108; ENST00000360719; ENST00000395650; ENST00000405237; ENST00000417176; ENST00000423069; ENST00000457250; ENST00000460853; ENST00000461117; ENST00000475238; ENST00000476790; ENST00000479886; ENST00000497224; BC142954; OTTHUMT00000317264; OTTHUMT00000317420; OTTHUMT00000317421; OTTHUMT00000317649; OTTHUMT000003…	RefSeq; ENSEMBL; GenBank; Havana transcript; ccdsGene; UCSC Genes; lncRNAWiki; NONCODE	chr22	coding
TC0400007580.hg.1	-2.84755	0.18783	9662	CEP135	centrosomal protein 135kDa	NM_025009; ENST00000257287; ENST00000422247; ENST00000506202; ENST00000506809; ENST00000515081; BC136535; BC136536; OTTHUMT00000362092; OTTHUMT00000362093; OTTHUMT00000362094; OTTHUMT00000362095; OTTHUMT00000362096; CCDS33986.1; hsa_circ_0003985; hsa_circ_0069813; hsa_circ_0069814; hsa_circ_0069815; hsa_circ_0069816; hsa_circ_0069817; hsa_circ_0069818; hsa_circ_0069819; hsa_circ_0069820; uc003hbh…	RefSeq; ENSEMBL; GenBank; Havana transcript; ccdsGene; circbase; UCSC Genes; Guo; lncRNAWiki; NONCODE	chr4	coding
TC0X00010841.hg.1	-2.84486	0.0161215	90161	HS6ST2	heparan sulfate 6-O-sulfotransferase 2	ENST00000602570; OTTHUMT00000467948; uc065bdq.1; NONHSAT138573	ENSEMBL; Havana transcript; UCSC Genes; lncRNAWiki; NONCODE	chrX	coding
TC0600011225.hg.1	-2.83482	6.33278e-05	8331	HIST1H2AJ	histone cluster 1, H2aj	NM_021066; ENST00000333151; BC133048; BC133050; OTTHUMT00000040154; CCDS4628.1; hsa_circ_0001594; uc003njn.2; uc063mkc.1; ENST00000625569	RefSeq; ENSEMBL; GenBank; Havana transcript; ccdsGene; circbase; UCSC Genes	chr6	coding
TC2200008400.hg.1	-2.83473	0.0182775		AP1B1	Zhang2013 ALT_ACCEPTOR, ALT_DONOR, coding, INTERNAL, intronic best transcript NM_001127	hsa_circ_0092279	circbase	chr22	ncrna
TC0500009031.hg.1	-2.8275	0.0647353	11005	SPINK5	serine peptidase inhibitor, Kazal type 5	NM_001127698; NM_001127699; NM_006846; ENST00000256084; ENST00000359874; ENST00000398454; ENST00000476608; ENST00000476697; ENST00000481286; ENST00000507988; ENST00000508733; ENST00000521206; OTTHUMT00000259215; OTTHUMT00000259216; OTTHUMT00000259217; OTTHUMT00000259219; OTTHUMT00000259220; OTTHUMT00000373334; OTTHUMT00000373335; OTTHUMT00000374360; OTTHUMT00000374361; uc003low.2; CCDS43382.1; CC…	RefSeq; ENSEMBL; Havana transcript; UCSC Genes; ccdsGene; Ace View	chr5	coding
TC2100006980.hg.1	-2.82712	0.107629		ITSN1	Transcript Identified by AceView, Entrez Gene ID(s) 6453	ITSN1.vrAug10-unspliced	Ace View	chr21	ncrna
TC0100015787.hg.1	-2.80789	0.0158465		POGZ	Transcript Identified by AceView, Entrez Gene ID(s) 23126	POGZ.vlAug10-unspliced	Ace View	chr1	ncrna
TC0200016274.hg.1	-2.79586	0.0121473		HDAC4	Transcript Identified by AceView, Entrez Gene ID(s) 9759	HDAC4.uAug10-unspliced	Ace View	chr2	ncrna
TC1900007012.hg.1	-2.7856	0.0267745	3949; 102465534	LDLR; MIR6886	low density lipoprotein receptor; microRNA 6886	NM_000527; NM_001195798; NM_001195799; NM_001195800; NM_001195803; NR_106946; ENST00000252444; ENST00000455727; ENST00000535915; ENST00000545707; ENST00000557933; ENST00000557958; ENST00000558013; ENST00000558518; ENST00000558528; ENST00000559340; ENST00000560173; ENST00000560467; ENST00000560502; ENST00000560628; ENST00000619864; BC014514; OTTHUMT00000415969; OTTHUMT00000415970; OTTHUMT000004159…	RefSeq; ENSEMBL; GenBank; Havana transcript; ccdsGene; circbase; Ace View; UCSC Genes; lncRNAWiki; NONCODE; RNACentral	chr19	coding
TC0100014228.hg.1	-2.77218	0.0422798	7804	LRP8	LDL receptor related protein 8	NM_001018054; NM_004631; NM_017522; NM_033300; ENST00000306052; ENST00000347547; ENST00000354412; ENST00000371454; ENST00000459674; ENST00000460214; ENST00000465675; ENST00000475501; ENST00000480045; ENST00000481431; ENST00000496580; ENST00000529670; ENST00000613948; BC051836; OTTHUMT00000024699; OTTHUMT00000024700; OTTHUMT00000024701; OTTHUMT00000024702; OTTHUMT00000024703; OTTHUMT00000024704; O…	RefSeq; ENSEMBL; GenBank; Havana transcript; ccdsGene; lncRNAWiki; circbase; Ace View; UCSC Genes; Guo; RNACentral; NONCODE	chr1	coding
TC0800007185.hg.1	-2.76671	0.0358898	11030	RBPMS	RNA binding protein with multiple splicing	NM_001008710; NM_001008711; NM_001008712; NM_006867; ENST00000287771; ENST00000320203; ENST00000339877; ENST00000397323; ENST00000517860; ENST00000519359; ENST00000519647; ENST00000519657; ENST00000520161; ENST00000520191; ENST00000520916; ENST00000520971; ENST00000521370; ENST00000521816; ENST00000522099; ENST00000522694; ENST00000522708; ENST00000523104; ENST00000523115; ENST00000523717; BC0036…	RefSeq; ENSEMBL; GenBank; Havana transcript; ccdsGene; circbase; Ace View; UCSC Genes; Guo; NONCODE; lncRNAWiki	chr8	coding
TC0500013282.hg.1	-2.76666	0.00424126	79844	ZDHHC11	zinc finger, DHHC-type containing 11	NM_024786; ENST00000283441; ENST00000424784; ENST00000503758; ENST00000503880; ENST00000505815; ENST00000507800; ENST00000508951; ENST00000511193; ENST00000511539; ENST00000512190; ENST00000512775; BC032000; OTTHUMT00000206681; OTTHUMT00000367501; OTTHUMT00000367502; OTTHUMT00000367503; OTTHUMT00000367504; OTTHUMT00000367505; OTTHUMT00000367528; OTTHUMT00000367529; OTTHUMT00000367530; OTTHUMT0000…	RefSeq; ENSEMBL; GenBank; Havana transcript; ccdsGene; circbase; UCSC Genes; Ace View; lncRNAWiki; NONCODE	chr5	coding
TC0300009916.hg.1	-2.73967	0.00140301	3280	HES1	hes family bHLH transcription factor 1	NM_005524; ENST00000232424; ENST00000476918; BC039152; OTTHUMT00000342632; OTTHUMT00000342633; BC172546; CCDS3305.1; hsa_circ_0068528; hsa_circ_0068529; hsa_circ_0068530; uc003ftq.3; uc062rok.1; NONHSAT094064	RefSeq; ENSEMBL; GenBank; Havana transcript; ccdsGene; circbase; UCSC Genes; lncRNAWiki; NONCODE	chr3	coding
TC1200012080.hg.1	-2.72644	0.00515657	54997	TESC	tescalcin	NM_001168325; NM_017899; NR_031766; ENST00000335209; ENST00000462502; ENST00000470612; ENST00000482176; ENST00000535198; ENST00000541210; ENST00000549210; ENST00000552139; BC015221; OTTHUMT00000291363; OTTHUMT00000291364; OTTHUMT00000291365; OTTHUMT00000291366; OTTHUMT00000291367; OTTHUMT00000404404; OTTHUMT00000404405; CCDS53835.1; CCDS9183.3; hsa_circ_0028614; hsa_circ_0028615; hsa_circ_0028616…	RefSeq; ENSEMBL; GenBank; Havana transcript; ccdsGene; circbase; Ace View; UCSC Genes; lncRNAWiki; NONCODE	chr12	coding
TC0600010810.hg.1	-2.71136	0.0713809	4739	NEDD9	neural precursor cell expressed, developmentally down-regulated 9	NM_001142393; NM_001271033; NM_006403; NM_182966; NR_073131; ENST00000379433; ENST00000379446; ENST00000397378; ENST00000448183; ENST00000459670; ENST00000461055; ENST00000468612; ENST00000504387; ENST00000504634; ENST00000505589; ENST00000508546; ENST00000508800; ENST00000512665; ENST00000513989; ENST00000514660; ENST00000620854; BC040207; OTTHUMT00000039853; OTTHUMT00000039854; OTTHUMT000000398…	RefSeq; ENSEMBL; GenBank; Havana transcript; UCSC Genes; ccdsGene; circbase; Ace View; lncRNAWiki; NONCODE	chr6	coding
TC1900006520.hg.1	-2.70433	0.00904841	513	ATP5D	ATP synthase, H+ transporting, mitochondrial F1 complex, delta subunit	NM_001001975; NM_001687; ENST00000215375; ENST00000395633; ENST00000588538; ENST00000589478; ENST00000590265; ENST00000591249; ENST00000591660; ENST00000592624; ENST00000614837; BC002389; BC004426; BC018079; OTTHUMT00000449958; OTTHUMT00000449959; OTTHUMT00000449960; OTTHUMT00000449961; OTTHUMT00000449962; OTTHUMT00000449963; OTTHUMT00000473909; OTTHUMT00000473910; OTTHUMT00000473911; ATP5D.cAug1…	RefSeq; ENSEMBL; GenBank; Havana transcript; Ace View; ccdsGene; circbase; UCSC Genes; lncRNAWiki; NONCODE	chr19	coding
TC0700013618.hg.1	-2.70273	0.339977	157247	MGC27345	uncharacterized protein MGC27345	NR_046216; BC024231; NONHSAT123178; NONHSAT123179; NR_046216.1:1..10079:ncRNA	RefSeq; GenBank; lncRNAWiki; NONCODE; RNACentral	chr7	ncrna
TC1600011292.hg.1	-2.68416	0.0435725	2175	FANCA	Fanconi anemia complementation group A	NM_000135; NM_001018112; NM_001286167; ENST00000305699; ENST00000389301; ENST00000389302; ENST00000534992; ENST00000543736; ENST00000561660; ENST00000561667; ENST00000561722; ENST00000562424; ENST00000563318; ENST00000563510; ENST00000563513; ENST00000563673; ENST00000563767; ENST00000564475; ENST00000564870; ENST00000564969; ENST00000565582; ENST00000566133; ENST00000566409; ENST00000566889; ENS…	RefSeq; ENSEMBL; Havana transcript; GenBank; ccdsGene; Ace View; circbase; UCSC Genes; Guo	chr16	coding
TC1100012906.hg.1	-2.68172	0.0440552	22997	IGSF9B	immunoglobulin superfamily, member 9B	NM_001277285; ENST00000321016; ENST00000526663; ENST00000527648; ENST00000530957; ENST00000533160; ENST00000533871; ENST00000564347; OTTHUMT00000393285; OTTHUMT00000393288; OTTHUMT00000393289; OTTHUMT00000431967; OTTHUMT00000471431; OTTHUMT00000471432; CCDS61010.1; hsa_circ_0024899; uc001qgz.3; uc031qfh.2; uc058jge.1; uc058jgf.1; uc058jgg.1; uc058jgh.1; uc058jgi.1; lnc-RP11-259P6.1.1-1:1; NONHSAT…	RefSeq; ENSEMBL; Havana transcript; ccdsGene; circbase; UCSC Genes; lncRNAWiki; NONCODE; lncRNA Db	chr11	coding
TC0X00006704.hg.1	-2.68091	0.0116991	9185	REPS2	RALBP1 associated Eps domain containing 2	NM_001080975; NM_004726; ENST00000303843; ENST00000357277; ENST00000469714; ENST00000470686; ENST00000481792; OTTHUMT00000055924; OTTHUMT00000055925; OTTHUMT00000055926; OTTHUMT00000055927; OTTHUMT00000316778; uc004cxv.1; CCDS14180.2; CCDS43919.1; hsa_circ_0089965; hsa_circ_0089966; hsa_circ_0089967; hsa_circ_0089968; hsa_circ_0089969; hsa_circ_0089970; hsa_circ_0089971; hsa_circ_0089972; hsa_cir…	RefSeq; ENSEMBL; Havana transcript; UCSC Genes; ccdsGene; circbase; Ace View; lncRNAWiki; NONCODE	chrX	coding
TC1100011348.hg.1	-2.67729	0.00141038	91703	ACY3	aminoacylase 3	NM_080658; ENST00000255082; ENST00000529256; BC008689; OTTHUMT00000394002; OTTHUMT00000394003; uc001omq.3; CCDS8175.1; uc058ejv.1	RefSeq; ENSEMBL; GenBank; Havana transcript; UCSC Genes; ccdsGene	chr11	coding
TC0600007268.hg.1	-2.6722	0.000222903	8364	HIST1H4C	histone cluster 1, H4c	NM_003542; ENST00000377803; BC054014; BC130558; BC130560; OTTHUMT00000040092; CCDS4583.1; uc003ngi.4	RefSeq; ENSEMBL; GenBank; Havana transcript; ccdsGene; UCSC Genes	chr6	coding
TC1000008643.hg.1	-2.67212	0.00268879	6319	SCD	stearoyl-CoA desaturase (delta-9-desaturase)	NM_005063; ENST00000370355; BC062303; OTTHUMT00000049857; CCDS7493.1; hsa_circ_0019509; hsa_circ_0019510; hsa_circ_0019511; hsa_circ_0019512; hsa_circ_0019513; hsa_circ_0019514; uc001kqy.4; NONHSAT015957; NONHSAT015958	RefSeq; ENSEMBL; GenBank; Havana transcript; ccdsGene; circbase; UCSC Genes; lncRNAWiki; NONCODE	chr10	coding
TC0100010233.hg.1	-2.65536	0.10137	391109	OR10K1	olfactory receptor, family 10, subfamily K, member 1	NM_001004473; ENST00000289451; BC137323; BC137324; OTTHUMT00000046367; uc010pij.2; CCDS30897.1; OR10K1.aAug10-unspliced	RefSeq; ENSEMBL; GenBank; Havana transcript; UCSC Genes; ccdsGene; Ace View	chr1	coding
TC1100012966.hg.1	-2.65417	0.0843767	9645	MICAL2	microtubule associated monooxygenase, calponin and LIM domain containing 2	NM_001282663; NM_001282664; NM_001282665; NM_001282666; NM_001282667; NM_001282668; NM_014632; ENST00000256194; ENST00000342902; ENST00000379612; ENST00000524685; ENST00000524730; ENST00000525075; ENST00000525119; ENST00000525216; ENST00000525444; ENST00000525618; ENST00000525979; ENST00000526475; ENST00000526604; ENST00000526672; ENST00000527195; ENST00000527546; ENST00000528931; ENST00000529562…	RefSeq; ENSEMBL; GenBank; Havana transcript; ccdsGene; circbase; Ace View; UCSC Genes; Guo; lncRNAWiki; NONCODE	chr11	coding
TC0600010777.hg.1	-2.64949	0.0141322	7020	TFAP2A	transcription factor AP-2 alpha (activating enhancer binding protein 2 alpha)	NM_001032280; NM_001042425; NM_003220; ENST00000319516; ENST00000379608; ENST00000379613; ENST00000461628; ENST00000462727; ENST00000464323; ENST00000465858; ENST00000466073; ENST00000473652; ENST00000474952; ENST00000475264; ENST00000478375; ENST00000482890; ENST00000486038; ENST00000488193; ENST00000489805; ENST00000490875; ENST00000497266; ENST00000498450; BC017754; OTTHUMT00000039815; OTTHUMT…	RefSeq; ENSEMBL; GenBank; Havana transcript; ccdsGene; Ace View; UCSC Genes; lncRNAWiki; NONCODE	chr6	coding
TC1000009919.hg.1	-2.64329	0.121857	1787	TRDMT1	tRNA aspartic acid methyltransferase 1	NM_004412; ENST00000313936; ENST00000354631; ENST00000377799; ENST00000424636; ENST00000436968; ENST00000451253; ENST00000452380; ENST00000479046; ENST00000486947; ENST00000488990; ENST00000495022; ENST00000525762; BC047733; OTTHUMT00000047024; OTTHUMT00000047025; OTTHUMT00000047026; OTTHUMT00000047027; OTTHUMT00000047028; OTTHUMT00000047029; OTTHUMT00000047030; OTTHUMT00000047032; OTTHUMT0000035…	RefSeq; ENSEMBL; GenBank; Havana transcript; ccdsGene; circbase; Ace View; UCSC Genes; Guo; lncRNAWiki; NONCODE	chr10	coding
TC0100015711.hg.1	-2.62232	0.039566	317772	HIST2H2AB	histone cluster 2, H2ab	NM_175065; ENST00000331128; OTTHUMT00000033440; BC172330; CCDS938.1; HIST2H2AB.aAug10-unspliced; uc001ete.4; BC132811	RefSeq; ENSEMBL; Havana transcript; GenBank; ccdsGene; Ace View; UCSC Genes	chr1	coding
TC1100007727.hg.1	-2.61484	0.00885823	374393	FAM111B	family with sequence similarity 111, member B	NM_001142703; NM_001142704; NM_198947; ENST00000343597; ENST00000411426; ENST00000528234; ENST00000529618; ENST00000534403; ENST00000620384; BC130513; BC130539; OTTHUMT00000393971; OTTHUMT00000393972; OTTHUMT00000393973; OTTHUMT00000393974; CCDS44611.1; CCDS7972.1; uc001nnl.5; uc001nnm.5; uc010rko.4; uc058bqr.1; uc058bqs.1; uc058bqt.1; NONHSAT021500	RefSeq; ENSEMBL; GenBank; Havana transcript; ccdsGene; UCSC Genes; lncRNAWiki; NONCODE	chr11	coding
TC0500011276.hg.1	-2.58334	0.525877		FAM151B	Memczak2013 ANTISENSE, coding, INTERNAL, intronic best transcript NM_205548	hsa_circ_0001507	circbase	chr5	ncrna
TC2200008528.hg.1	-2.57009	0.074089	9215	LARGE	like-glycosyltransferase	NM_004737; NM_133642; ENST00000354992; ENST00000397394; ENST00000402320; ENST00000413114; ENST00000421232; ENST00000421768; ENST00000423375; ENST00000430220; ENST00000432776; ENST00000434071; ENST00000462606; ENST00000476315; ENST00000494763; ENST00000608642; ENST00000609799; ENST00000610186; BC117425; BC126404; OTTHUMT00000320515; OTTHUMT00000320516; OTTHUMT00000320564; OTTHUMT00000320565; OTTHU…	RefSeq; ENSEMBL; GenBank; Havana transcript; UCSC Genes; ccdsGene; circbase; Ace View; Guo; lncRNAWiki; NONCODE	chr22	coding
TC0X00007522.hg.1	-2.54827	0.0327242	27112	FAM155B	family with sequence similarity 155, member B	NM_015686; ENST00000252338; BC136518; BC136519; OTTHUMT00000057037; CCDS35317.1; uc004dxk.4	RefSeq; ENSEMBL; GenBank; Havana transcript; ccdsGene; UCSC Genes	chrX	coding
TC1900006646.hg.1	-2.5397	0.120523	126326	GIPC3	GIPC PDZ domain containing family, member 3	NM_133261; ENST00000322315; BC117312; BC117314; OTTHUMT00000394577; CCDS32871.1; GIPC3.bAug10; hsa_circ_0048499; uc002lyd.5	RefSeq; ENSEMBL; GenBank; Havana transcript; ccdsGene; Ace View; circbase; UCSC Genes	chr19	coding
TC0600007285.hg.1	-2.53783	0.00291842	3012	HIST1H2AE	histone cluster 1, H2ae	NM_021052; ENST00000303910; BC093836; BC093862; OTTHUMT00000040103; CCDS4595.1; HIST1H2AE.aAug10-unspliced; uc003nha.2	RefSeq; ENSEMBL; GenBank; Havana transcript; ccdsGene; Ace View; UCSC Genes	chr6	coding
TC1300006785.hg.1	-2.53487	0.000381517	145173	B3GLCT	beta 3-glucosyltransferase	NM_194318; ENST00000343307; ENST00000461652; BC068595; OTTHUMT00000044396; OTTHUMT00000044397; CCDS9341.1; hsa_circ_0002635; hsa_circ_0029907; hsa_circ_0029908; uc010aaz.4; uc058wfg.1; chr13_31789187_31803431	RefSeq; ENSEMBL; GenBank; Havana transcript; ccdsGene; circbase; UCSC Genes; Guo	chr13	coding
TC0100007980.hg.1	-2.53074	0.00810041	1503	CTPS1	CTP synthase 1	NM_001301237; NM_001905; NR_125440; ENST00000372616; ENST00000372621; ENST00000463285; ENST00000463423; ENST00000464283; ENST00000470271; ENST00000475060; ENST00000479480; ENST00000480420; ENST00000486889; ENST00000497210; ENST00000498694; BC009408; OTTHUMT00000015629; OTTHUMT00000015630; OTTHUMT00000015631; OTTHUMT00000015632; OTTHUMT00000015633; OTTHUMT00000015634; OTTHUMT00000015636; OTTHUMT00…	RefSeq; ENSEMBL; GenBank; Havana transcript; ccdsGene; circbase; UCSC Genes; Guo; lncRNAWiki; NONCODE	chr1	coding
TC0500008568.hg.1	-2.52557	0.000724273	6558	SLC12A2	solute carrier family 12 (sodium/potassium/chloride transporter), member 2	NM_001046; NM_001256461; NR_046207; ENST00000262461; ENST00000343225; ENST00000502849; ENST00000504416; ENST00000507791; ENST00000509205; ENST00000509616; ENST00000628403; BC144221; BC146839; OTTHUMT00000250972; OTTHUMT00000372404; OTTHUMT00000372405; OTTHUMT00000372406; OTTHUMT00000372407; OTTHUMT00000372408; OTTHUMT00000372471; CCDS4144.1; CCDS58965.1; hsa_circ_0006034; hsa_circ_0073758; hsa_ci…	RefSeq; ENSEMBL; GenBank; Havana transcript; ccdsGene; circbase; Ace View; UCSC Genes; lncRNAWiki; NONCODE	chr5	coding
TC0400007933.hg.1	-2.51811	0.00121325	306	ANXA3	annexin A3	NM_005139; ENST00000264908; ENST00000503570; ENST00000503776; ENST00000505805; ENST00000508214; ENST00000510502; ENST00000512373; ENST00000512542; ENST00000512884; ENST00000514171; BC000871; OTTHUMT00000252516; OTTHUMT00000362870; OTTHUMT00000362871; OTTHUMT00000362872; OTTHUMT00000363490; OTTHUMT00000363491; OTTHUMT00000363492; OTTHUMT00000363493; OTTHUMT00000363494; OTTHUMT00000363495; ANXA3.cA…	RefSeq; ENSEMBL; GenBank; Havana transcript; Ace View; ccdsGene; circbase; UCSC Genes; lncRNAWiki; NONCODE	chr4	coding
TC1400006663.hg.1	-2.51554	0.0118745	26020	LRP10	LDL receptor related protein 10	NM_014045; ENST00000359591; ENST00000470660; ENST00000546834; ENST00000551466; ENST00000553002; BC113714; BC113716; OTTHUMT00000071663; OTTHUMT00000071664; OTTHUMT00000408287; OTTHUMT00000408288; OTTHUMT00000408289; CCDS9578.1; hsa_circ_0031226; hsa_circ_0031227; hsa_circ_0031228; hsa_circ_0031229; hsa_circ_0031230; uc001whd.4; uc058zka.1; uc058zkb.1; uc058zkc.1; uc058zkd.1; NONHSAT035827	RefSeq; ENSEMBL; GenBank; Havana transcript; ccdsGene; circbase; UCSC Genes; lncRNAWiki; NONCODE	chr14	coding
TC0X00008862.hg.1	-2.50649	0.0092279	65991	FUNDC2	FUN14 domain containing 2	NM_023934; ENST00000369498; ENST00000456179; ENST00000471528; ENST00000475165; ENST00000484175; ENST00000485289; ENST00000492303; BC000255; BC072685; BC108657; OTTHUMT00000037641; OTTHUMT00000037642; OTTHUMT00000037643; OTTHUMT00000037644; OTTHUMT00000037645; OTTHUMT00000037646; OTTHUMT00000037647; CCDS14763.1; FUNDC2.iAug10; uc004fmw.4; uc065cjf.1; uc065cjg.1; uc065cjh.1; uc065cji.1; uc065cjj.1;…	RefSeq; ENSEMBL; GenBank; Havana transcript; ccdsGene; Ace View; UCSC Genes; lncRNAWiki; NONCODE	chrX	coding
TC1700008794.hg.1	-2.48334	0.0577967	6662	SOX9	SRY box 9	NM_000346; ENST00000245479; BC007951; BC056420; OTTHUMT00000389032; CCDS11689.1; hsa_circ_0045521; uc002jiw.4	RefSeq; ENSEMBL; GenBank; Havana transcript; ccdsGene; circbase; UCSC Genes	chr17	coding
TC1600011496.hg.1	-2.47557	0.0292664	51704	GPRC5B	G protein-coupled receptor, class C, group 5, member B	NM_001304771; NM_016235; ENST00000535671; ENST00000562348; ENST00000562469; ENST00000564449; ENST00000566822; ENST00000568214; ENST00000569479; ENST00000569847; ENST00000570142; BC034467; CCDS10581.1; GPRC5B.eAug10; hsa_circ_0038381; hsa_circ_0038382; uc059roz.1; uc059rpa.1; uc059rpb.1; uc059rpc.1; uc059rpd.1; uc059rpe.1; uc059rpf.1; uc059rpg.1; uc059rph.1; NONHSAT140910; OTTHUMT00000436045; OTTH…	RefSeq; ENSEMBL; GenBank; ccdsGene; Ace View; circbase; UCSC Genes; lncRNAWiki; NONCODE; Havana transcript	chr16	coding
TC0400012473.hg.1	-2.45864	0.103456	2823	GPM6A	glycoprotein M6A	NM_001261447; NM_001261448; NM_005277; NM_201591; NM_201592; NR_048571; ENST00000280187; ENST00000393658; ENST00000502754; ENST00000503397; ENST00000503563; ENST00000505304; ENST00000505375; ENST00000505561; ENST00000506219; ENST00000506894; ENST00000507080; ENST00000507520; ENST00000507540; ENST00000508323; ENST00000509865; ENST00000512509; ENST00000512610; ENST00000512897; ENST00000513365; ENST…	RefSeq; ENSEMBL; GenBank; Havana transcript; ccdsGene; Ace View; UCSC Genes; lncRNAWiki; NONCODE	chr4	coding
TC0X00010851.hg.1	-2.45046	0.0118236	2719	GPC3	glypican 3	NM_001164617; NM_001164618; NM_001164619; NM_004484; ENST00000370818; ENST00000394299; ENST00000406757; ENST00000631057; BC035972; OTTHUMT00000058356; OTTHUMT00000058357; OTTHUMT00000484549; CCDS14638.1; CCDS55496.1; hsa_circ_0091579; hsa_circ_0091580; hsa_circ_0091581; hsa_circ_0091582; uc004exe.4; uc010nrn.4; uc010nro.4; uc065bdx.1	RefSeq; ENSEMBL; GenBank; Havana transcript; ccdsGene; circbase; UCSC Genes	chrX	coding
TC1900011782.hg.1	-2.4353	0.255567	199800; 126129	ADM5; CPT1C	adrenomedullin 5 (putative); carnitine palmitoyltransferase 1C	NM_001101340; NM_001136052; NM_001199752; NM_001199753; NM_152359; NR_108072; ENST00000295404; ENST00000323446; ENST00000392518; ENST00000405931; ENST00000420022; ENST00000594038; ENST00000594431; ENST00000594587; ENST00000595031; ENST00000595568; ENST00000595901; ENST00000595969; ENST00000596701; ENST00000596922; ENST00000597099; ENST00000598072; ENST00000598259; ENST00000598293; ENST00000598396…	RefSeq; ENSEMBL; GenBank; Havana transcript; ccdsGene; Ace View; circbase; UCSC Genes; lncRNAWiki; NONCODE	chr19	coding
TC1200011470.hg.1	-2.4288	0.0412994	1848	DUSP6	dual specificity phosphatase 6	NM_001946; NM_022652; ENST00000279488; ENST00000308385; ENST00000547140; ENST00000547291; ENST00000548755; BC003143; BC003562; BC005047; BC037236; OTTHUMT00000406534; OTTHUMT00000406535; OTTHUMT00000406536; OTTHUMT00000406537; OTTHUMT00000406538; CCDS9033.1; CCDS9034.1; DUSP6.dAug10; uc001tay.5; uc001taz.5; uc058roo.1; uc058rop.1; uc058ror.1	RefSeq; ENSEMBL; GenBank; Havana transcript; ccdsGene; Ace View; UCSC Genes	chr12	coding
TC0100012345.hg.1	-2.42662	0.0688098	391192	OR2L3	olfactory receptor, family 2, subfamily L, member 3	NM_001004687; ENST00000359959; BC137039; BC137040; OTTHUMT00000096852; uc001idx.1; CCDS31104.1; OR2L3.aAug10-unspliced	RefSeq; ENSEMBL; GenBank; Havana transcript; UCSC Genes; ccdsGene; Ace View	chr1	coding
TC0100017446.hg.1	-2.42173	0.0105576	55061	SUSD4	sushi domain containing 4	NM_001037175; NM_017982; ENST00000342943; ENST00000343846; ENST00000344029; ENST00000366878; ENST00000470249; ENST00000484503; ENST00000484758; ENST00000494793; ENST00000497669; ENST00000608996; BC004888; OTTHUMT00000092592; OTTHUMT00000092593; OTTHUMT00000092595; OTTHUMT00000092711; OTTHUMT00000092713; OTTHUMT00000092714; OTTHUMT00000092715; OTTHUMT00000092716; OTTHUMT00000472744; uc001hnx.3; CC…	RefSeq; ENSEMBL; GenBank; Havana transcript; UCSC Genes; ccdsGene; circbase; Ace View	chr1	coding
TC0600012747.hg.1	-2.41535	0.000794194	100133941	CD24	CD24 molecule	NM_001291737; NM_001291738; NM_001291739; NM_013230; NR_117089; NR_117090; ENST00000606017; ENST00000610952; ENST00000615659; ENST00000619133; ENST00000619869; ENST00000620405; ENST00000621311; ENST00000622315; BC064619; OTTHUMT00000477241; OTTHUMT00000477242; OTTHUMT00000477243; OTTHUMT00000477244; OTTHUMT00000477245; OTTHUMT00000477247; OTTHUMT00000477249; CCDS75499.1; uc032xhb.2; uc032xhc.2; u…	RefSeq; ENSEMBL; GenBank; Havana transcript; ccdsGene; UCSC Genes	chr6	coding
TC1000011003.hg.1	-2.41441	0.0963272	84647	PLA2G12B	phospholipase A2, group XIIB	NM_032562; ENST00000373032; BC093996; BC111946; BC143532; OTTHUMT00000048598; CCDS7319.1; uc001jtf.2	RefSeq; ENSEMBL; GenBank; Havana transcript; ccdsGene; UCSC Genes	chr10	coding
TC1900009805.hg.1	-2.41149	0.106074	90378	SAMD1	sterile alpha motif domain containing 1	NM_138352; OTTHUMT00000390925; OTTHUMT00000403040; OTTHUMT00000403041; hsa_circ_0049717; moter.aAug10; uc060ulq.1; uc060ulr.1; uc060uls.1; ENST00000269724; ENST00000533683; ENST00000541938; NONHSAT061379	RefSeq; Havana transcript; circbase; Ace View; UCSC Genes; ENSEMBL; NONCODE	chr19	coding
TC1600008166.hg.1	-2.40567	0.00112832	10664	CTCF	CCCTC-binding factor (zinc finger protein)	NM_001191022; NM_006565; ENST00000264010; ENST00000401394; ENST00000566078; BC014267; OTTHUMT00000268870; OTTHUMT00000318525; OTTHUMT00000421179; CCDS10841.1; CCDS54029.1; hsa_circ_0000709; hsa_circ_0002122; hsa_circ_0007801; hsa_circ_0008272; hsa_circ_0039839; hsa_circ_0039840; hsa_circ_0039841; hsa_circ_0039842; hsa_circ_0039843; hsa_circ_0039844; hsa_circ_0039845; hsa_circ_0039846; hsa_circ_00…	RefSeq; ENSEMBL; GenBank; Havana transcript; ccdsGene; circbase; UCSC Genes; Guo	chr16	coding
TC1700012351.hg.1	-2.40017	0.038647	9196	KCNAB3	potassium channel, voltage gated subfamily A regulatory beta subunit 3	NM_004732; ENST00000303790; ENST00000570587; ENST00000570852; ENST00000572275; ENST00000574006; ENST00000576981; BC096232; BC096234; BC099634; OTTHUMT00000226974; OTTHUMT00000440854; OTTHUMT00000440855; OTTHUMT00000440856; OTTHUMT00000440857; OTTHUMT00000440858; CCDS11124.1; uc002gjm.2; uc060aws.1; uc060awt.1; uc060awu.1; uc060aww.1; uc060awx.1; NONHSAT145463; NONHSAT145464; NONHSAT145465	RefSeq; ENSEMBL; GenBank; Havana transcript; ccdsGene; UCSC Genes; lncRNAWiki; NONCODE	chr17	coding
TC0500013349.hg.1	-2.39052	0.0138686	2201	FBN2	fibrillin 2	NM_001999; ENST00000262464; ENST00000502468; ENST00000507835; ENST00000508989; ENST00000511489; ENST00000514742; ENST00000619499; ENST00000620257; OTTHUMT00000372793; OTTHUMT00000372794; OTTHUMT00000372795; OTTHUMT00000372796; OTTHUMT00000372797; uc003kuu.3; CCDS34222.1; FBN2.eAug10; GU014836; hsa_circ_0003173; hsa_circ_0073776; hsa_circ_0073777; hsa_circ_0073778; hsa_circ_0073779; hsa_circ_00737…	RefSeq; ENSEMBL; Havana transcript; UCSC Genes; ccdsGene; Ace View; GenBank; circbase; lncRNAWiki; NONCODE	chr5	coding
TC0100009870.hg.1	-2.38411	0.0128229	554313; 8370	HIST2H4B; HIST2H4A	histone cluster 2, H4b; histone cluster 2, H4a	NM_001034077; ENST00000578186; ENST00000613412; ENST00000614272; ENST00000618193; OTTHUMT00000477881; OTTHUMT00000477882; OTTHUMT00000477883; OTTHUMT00000477884; NM_003548_2; BC153063; CCDS30847.1; HIST2H4A.eAug10; uc001ess.4; uc001esu.2; uc057kln.1; uc057klo.1; BC093969; BC112193	RefSeq; ENSEMBL; Havana transcript; GenBank; ccdsGene; Ace View; UCSC Genes	chr1	coding
TC1700010363.hg.1	-2.38328	0.0216404		RP11-466A19.5; MYO1D	Transcript Identified by AceView, Entrez Gene ID(s) 4642; novel transcript, sense intronic MYO1D	ENST00000577227.1; MYO1D.rAug10; OTTHUMT00000447478; uc060dwe.1; ENST00000577227; HG508929.1:1..475:ncRNA; NONHSAT052960	lncRNAWiki; Ace View; Havana transcript; UCSC Genes; ENSEMBL; RNACentral; NONCODE	chr17	ncrna
TC2000008682.hg.1	-2.3829	0.0567543	1469	CST1	cystatin SN	NM_001898; ENST00000304749; ENST00000398402; BC021225; OTTHUMT00000078351; OTTHUMT00000256835; uc002wtp.3; CCDS13160.1; uc061vvz.1	RefSeq; ENSEMBL; GenBank; Havana transcript; UCSC Genes; ccdsGene	chr20	coding
TC2100007916.hg.1	-2.37823	0.071848	337878	KRTAP7-1	keratin associated protein 7-1 (gene/pseudogene)	NM_181606; ENST00000621162; OTTHUMT00000476858; CCDS74780.1; ENST00000452750.1; uc032pxy.2	RefSeq; ENSEMBL; Havana transcript; ccdsGene; lncRNAWiki; UCSC Genes	chr21	coding
TC1100012949.hg.1	-2.36928	0.00519964	8519	IFITM1	interferon induced transmembrane protein 1	NM_003641; ENST00000328221; ENST00000408968; ENST00000525554; ENST00000528780; BC000897; OTTHUMT00000383595; OTTHUMT00000386371; OTTHUMT00000386372; OTTHUMT00000386373; CCDS41584.1; hsa_circ_0020623; hsa_circ_0020624; IFITM1.cAug10; IFITM1.fAug10; uc001loy.5; uc057xel.1; uc057xem.1; uc057xen.1; NONHSAT017225	RefSeq; ENSEMBL; GenBank; Havana transcript; ccdsGene; circbase; Ace View; UCSC Genes; NONCODE	chr11	coding
TC1500007156.hg.1	-2.3654	0.172088	283652	SLC24A5	solute carrier family 24 (sodium/potassium/calcium exchanger), member 5	NM_205850; ENST00000341459; ENST00000449382; ENST00000463289; ENST00000482911; BC113628; BC113630; BC143950; OTTHUMT00000254340; OTTHUMT00000317357; OTTHUMT00000317358; OTTHUMT00000416907; CCDS10128.1; SLC24A5.cAug10; uc001zwd.4; uc001zwe.4; uc010bel.4; uc059iww.1; NONHSAT042323	RefSeq; ENSEMBL; GenBank; Havana transcript; ccdsGene; Ace View; UCSC Genes; lncRNAWiki; NONCODE	chr15	coding
TC1900008286.hg.1	-2.3633	0.209448	4059	BCAM	basal cell adhesion molecule (Lutheran blood group)	NM_001013257; NM_005581; ENST00000270233; ENST00000588303; ENST00000588603; ENST00000588714; ENST00000589558; ENST00000589651; ENST00000590108; ENST00000590196; ENST00000590624; ENST00000591520; ENST00000611077; BC050450; OTTHUMT00000453219; OTTHUMT00000453220; OTTHUMT00000453222; OTTHUMT00000453223; OTTHUMT00000453224; OTTHUMT00000453225; OTTHUMT00000453226; OTTHUMT00000453227; OTTHUMT0000045322…	RefSeq; ENSEMBL; GenBank; Havana transcript; ccdsGene; UCSC Genes; lncRNAWiki; NONCODE	chr19	coding
TC0600007374.hg.1	-2.36154	0.00094044	8329	HIST1H2AI	histone cluster 1, H2ai	NM_003509; ENST00000358739; BC112254; BC112256; OTTHUMT00000040152; CCDS4626.1; uc063mkb.1	RefSeq; ENSEMBL; GenBank; Havana transcript; ccdsGene; UCSC Genes	chr6	coding
TC0600011224.hg.1	-2.35915	0.0335871	8340	HIST1H2BL	histone cluster 1, H2bl	NM_003519; ENST00000377401; OTTHUMT00000040153; CCDS4625.1; uc003njl.4	RefSeq; ENSEMBL; Havana transcript; ccdsGene; UCSC Genes	chr6	coding
TC1300009348.hg.1	-2.35432	0.00536921	10253	SPRY2	sprouty RTK signaling antagonist 2	NM_005842; ENST00000377102; ENST00000377104; ENST00000540649; BC004205; BC015745; OTTHUMT00000045386; OTTHUMT00000045387; CCDS9463.1; uc001vli.4; uc001vlj.4; uc058xri.1	RefSeq; ENSEMBL; GenBank; Havana transcript; ccdsGene; UCSC Genes	chr13	coding
TSUnmapped00000220.hg.1	-2.35249	0.317302	11093	ADAMTS13	ADAM metallopeptidase with thrombospondin type 1 motif 13	ENST00000626597	ENSEMBL		coding
TC1900008824.hg.1	-2.35218	0.0868411	91663	MYADM	myeloid-associated differentiation marker	NM_001020818; NM_001020819; NM_001020820; NM_001020821; NM_001290188; NM_001290189; NM_001290190; NM_001290191; NM_001290192; NM_001290193; NM_001290194; NM_138373; ENST00000336967; ENST00000391768; ENST00000391769; ENST00000391770; ENST00000391771; ENST00000414489; ENST00000421337; ENST00000439000; ENST00000448420; BC013995; BC095412; OTTHUMT00000134336; OTTHUMT00000134337; OTTHUMT00000134338; O…	RefSeq; ENSEMBL; GenBank; Havana transcript; UCSC Genes; ccdsGene; lncRNAWiki; circbase; RNACentral; NONCODE; lncRNA Db	chr19	coding
TSUnmapped00000513.hg.1	-2.34013	0.128861	8527	DGKD	diacylglycerol kinase, delta 130kDa	ENST00000630311	ENSEMBL		coding
TC1100012424.hg.1	-2.33968	0.0812917	23387	SIK3	SIK family kinase 3	NM_001281748; NM_001281749; NM_025164; ENST00000375300; ENST00000413553; ENST00000415541; ENST00000445177; ENST00000446921; ENST00000454905; ENST00000465421; ENST00000472648; ENST00000480222; ENST00000480468; ENST00000485363; ENST00000488337; ENST00000497049; BC128510; BC128511; OTTHUMT00000142858; OTTHUMT00000142859; OTTHUMT00000142860; OTTHUMT00000142861; OTTHUMT00000142862; OTTHUMT00000142863;…	RefSeq; ENSEMBL; GenBank; Havana transcript; ccdsGene; circbase; Ace View; UCSC Genes; Guo; lncRNAWiki; NONCODE	chr11	coding
TC1700008218.hg.1	-2.33842	0.30736	729220	FLJ45513; RP11-304F15.3	uncharacterized LOC729220; novel transcript antisense to TAC4	NM_001242791; ENST00000376609.1; OTTHUMT00000366195; uc021tzt.2; ENST00000376609; HG509218.1:1..2100:ncRNA; NONHSAT054568	RefSeq; lncRNAWiki; Havana transcript; UCSC Genes; ENSEMBL; RNACentral; NONCODE	chr17	coding
TC2200006878.hg.1	-2.33394	0.13423	2953	GSTT2	glutathione S-transferase theta 2 (gene/pseudogene)	NR_126442; NR_126446; ENST00000402588; ENST00000621118; OTTHUMT00000320080; NM_000854_2; NM_001080843_3; NM_001302670_3; NR_126445_2; BC002415_2; BC071700_2; BC146929_2; BC146936_2; BC146940_2; BC146943_2; uc062cil.1; uc062cim.1	RefSeq; ENSEMBL; Havana transcript; GenBank; UCSC Genes	chr22	coding
TC0100010543.hg.1	-2.3288	0.000507302	481	ATP1B1	ATPase, Na+/K+ transporting, beta 1 polypeptide	NM_001677; ENST00000367815; ENST00000367816; ENST00000494797; BC000006; OTTHUMT00000083695; OTTHUMT00000083696; OTTHUMT00000083697; CCDS1276.1; hsa_circ_0015152; hsa_circ_0015153; uc001gfr.2; uc057ndh.1; uc057ndi.1	RefSeq; ENSEMBL; GenBank; Havana transcript; ccdsGene; circbase; UCSC Genes	chr1	coding
TC0300011049.hg.1	-2.32781	0.51177		QRICH1	Transcript Identified by AceView, Entrez Gene ID(s) 54870	QRICH1.rAug10-unspliced	Ace View	chr3	ncrna
TC1000008733.hg.1	-2.32529	0.017528	79847	MFSD13A	major facilitator superfamily domain containing 13A	NM_024789; ENST00000238936; ENST00000369931; ENST00000428200; ENST00000450947; ENST00000469294; BC113589; OTTHUMT00000050069; OTTHUMT00000050072; OTTHUMT00000050075; OTTHUMT00000050076; CCDS7535.1; hsa_circ_0019734; hsa_circ_0019735; hsa_circ_0019736; hsa_circ_0019737; TMEM180.fAug10; TMEM180.kAug10; uc001kvs.4; uc001kvt.4; uc057vqn.1; uc057vqo.1; uc057vqp.1; lnc-SUFU-1:1; lnc-SUFU-1:2; lnc-SUFU-…	RefSeq; ENSEMBL; GenBank; Havana transcript; ccdsGene; circbase; Ace View; UCSC Genes; lncRNAWiki; NONCODE	chr10	coding
TC1400007495.hg.1	-2.31819	0.0607643	57475	PLEKHH1	pleckstrin homology domain containing, family H (with MyTH4 domain) member 1	NM_020715; ENST00000329153; ENST00000557971; ENST00000558214; ENST00000558296; ENST00000558366; ENST00000558386; ENST00000558981; ENST00000559168; ENST00000559766; ENST00000559832; ENST00000559981; ENST00000560100; ENST00000561057; ENST00000561135; ENST00000561370; ENST00000561456; BC146787; OTTHUMT00000412730; OTTHUMT00000416994; OTTHUMT00000416995; OTTHUMT00000416996; OTTHUMT00000416997; OTTHUM…	RefSeq; ENSEMBL; GenBank; Havana transcript; ccdsGene; Ace View; UCSC Genes; lncRNAWiki; NONCODE	chr14	coding
TC1600009779.hg.1	-2.31657	0.0825991		ARHGAP17	Memczak2013 ALT_ACCEPTOR, ALT_DONOR, coding, INTERNAL, intronic best transcript NM_001006634	hsa_circ_0000683	circbase	chr16	ncrna
TC0800011486.hg.1	-2.31021	0.126792	27012	KCNV1	potassium channel, voltage gated modifier subfamily V, member 1	NM_014379; ENST00000297404; ENST00000524391; BC028739; OTTHUMT00000385525; CCDS6314.1; uc003ynr.5; uc010mcw.4; NONHSAT128306	RefSeq; ENSEMBL; GenBank; Havana transcript; ccdsGene; UCSC Genes; lncRNAWiki; NONCODE	chr8	coding
TC0100010824.hg.1	-2.30738	0.039834	777	CACNA1E	calcium channel, voltage-dependent, R type, alpha 1E subunit	NM_000721; NM_001205293; NM_001205294; ENST00000357570; ENST00000358338; ENST00000360108; ENST00000367567; ENST00000367570; ENST00000367573; ENST00000524607; ENST00000533229; ENST00000621551; ENST00000621791; OTTHUMT00000090791; OTTHUMT00000090792; OTTHUMT00000090793; OTTHUMT00000394700; OTTHUMT00000394701; OTTHUMT00000394702; BC172376; CCDS53443.1; CCDS55664.1; CCDS55665.1; hsa_circ_0015532; hsa…	RefSeq; ENSEMBL; Havana transcript; GenBank; ccdsGene; circbase; UCSC Genes; lncRNAWiki; NONCODE	chr1	coding
TC1000011799.hg.1	-2.3072	0.122817		XPNPEP1	Transcript Identified by AceView, Entrez Gene ID(s) 7511	XPNPEP1.vpAug10-unspliced	Ace View	chr10	ncrna
TC1700011813.hg.1	-2.30641	0.0238732	55808	ST6GALNAC1	ST6 (alpha-N-acetyl-neuraminyl-2,3-beta-galactosyl-1,3)-N-acetylgalactosaminide alpha-2,6-sialyltransferase 1	NM_001289107; NM_018414; NR_110309; ENST00000156626; ENST00000359088; ENST00000585633; ENST00000588375; ENST00000589004; ENST00000589813; ENST00000589992; ENST00000590784; ENST00000590878; ENST00000590915; ENST00000592042; BC022462; OTTHUMT00000450972; OTTHUMT00000450973; OTTHUMT00000450974; OTTHUMT00000450975; OTTHUMT00000450976; OTTHUMT00000450977; OTTHUMT00000450978; OTTHUMT00000450979; OTTHUM…	RefSeq; ENSEMBL; GenBank; Havana transcript; ccdsGene; circbase; Ace View; UCSC Genes; lncRNAWiki; NONCODE	chr17	coding
TC0600008674.hg.1	-2.30003	0.00346776	134701	RIPPLY2	ripply transcriptional repressor 2	NM_001009994; NR_103525; ENST00000369687; ENST00000369689; BC130460; BC132968; OTTHUMT00000041360; OTTHUMT00000041361; CCDS34493.1; RIPPLY2andCYB5R4.cAug10; uc003pke.5; uc032xck.2; NONHSAT113794	RefSeq; ENSEMBL; GenBank; Havana transcript; ccdsGene; Ace View; UCSC Genes; lncRNAWiki; NONCODE	chr6	coding
TC1100013006.hg.1	-2.29469	0.148254	1270	CNTF	ciliary neurotrophic factor	NM_000614; ENST00000361987; BC068030; BC069167; BC074963; BC074964; OTTHUMT00000268673; CCDS31554.1; hsa_circ_0022191; uc001nna.5; NR_024091.1:1..3544:ncRNA	RefSeq; ENSEMBL; GenBank; Havana transcript; ccdsGene; circbase; UCSC Genes; RNACentral	chr11	coding
TC2200009324.hg.1	-2.28702	0.0472337	51233	DRICH1	aspartate-rich 1	NM_016449; ENST00000317749; ENST00000614553; BC056888; OTTHUMT00000319708; C22orf43.aAug10; CCDS42985.1; uc062cfp.1; NONHSAT083919; uc002zxf.3	RefSeq; ENSEMBL; GenBank; Havana transcript; Ace View; ccdsGene; UCSC Genes; lncRNAWiki; NONCODE	chr22	coding
TC0800009856.hg.1	-2.28449	0.0359103	1960	EGR3	early growth response 3	NM_001199880; NM_001199881; NM_004430; ENST00000317216; ENST00000518773; ENST00000519492; ENST00000522910; ENST00000524088; BC104765; BC112279; OTTHUMT00000215098; OTTHUMT00000375023; OTTHUMT00000375024; OTTHUMT00000375025; OTTHUMT00000375026; CCDS56528.1; CCDS6033.1; EGR3.bAug10; EGR3.dAug10; EGR3.eAug10; uc003xcm.2; uc011kzn.2; uc064lcl.1; uc064lcm.1; uc064lcn.1	RefSeq; ENSEMBL; GenBank; Havana transcript; ccdsGene; Ace View; UCSC Genes	chr8	coding
TC0300007679.hg.1	-2.27422	0.0210429	6314	ATXN7	ataxin 7	NM_000333; NM_001128149; NM_001177387; ENST00000295900; ENST00000466529; ENST00000472569; ENST00000474112; ENST00000474513; ENST00000475897; ENST00000477516; ENST00000484332; ENST00000484668; ENST00000487717; ENST00000488239; ENST00000522345; ENST00000538065; OTTHUMT00000352070; OTTHUMT00000352071; OTTHUMT00000352072; OTTHUMT00000352073; OTTHUMT00000352074; OTTHUMT00000352075; OTTHUMT00000352076;…	RefSeq; ENSEMBL; Havana transcript; Ace View; GenBank; ccdsGene; circbase; UCSC Genes; Guo; lncRNAWiki; NONCODE	chr3	coding
TC0600011377.hg.1	-2.2708	0.00964333	11270	NRM	nurim (nuclear envelope membrane protein)	NM_001270707; NM_007243; NR_073065; NR_073072; ENST00000259953; ENST00000376420; ENST00000376421; ENST00000444096; ENST00000462857; ENST00000470733; ENST00000474864; ENST00000482141; ENST00000495946; BC039865; OTTHUMT00000076466; OTTHUMT00000256734; OTTHUMT00000256735; OTTHUMT00000256736; OTTHUMT00000256737; OTTHUMT00000256738; OTTHUMT00000256739; OTTHUMT00000256740; NM_001270708_3; NM_001270709_…	RefSeq; ENSEMBL; GenBank; Havana transcript; ccdsGene; UCSC Genes; lncRNAWiki; NONCODE	chr6	coding
TC1000008328.hg.1	-2.27075	0.0127041	54537	FAM35A	family with sequence similarity 35, member A	NM_019054; ENST00000298784; ENST00000298786; ENST00000437629; BC051863; OTTHUMT00000049173; OTTHUMT00000049196; OTTHUMT00000049197; CCDS7383.1; hsa_circ_0019038; hsa_circ_0019039; hsa_circ_0019040; hsa_circ_0019041; uc001kei.5; uc001kej.5; uc057urk.1; lnc-FAM35A-1:1; NONHSAT015396	RefSeq; ENSEMBL; GenBank; Havana transcript; ccdsGene; circbase; UCSC Genes; lncRNAWiki; NONCODE	chr10	coding
TC0100012360.hg.1	-2.26717	0.0313145	401993	OR2T5	olfactory receptor, family 2, subfamily T, member 5	NM_001004697; ENST00000366473; BC140747; BC140915; OTTHUMT00000097422; uc001iem.1; CCDS31118.1	RefSeq; ENSEMBL; GenBank; Havana transcript; UCSC Genes; ccdsGene	chr1	coding
TC0300012243.hg.1	-2.26602	0.0829826	84561	SLC12A8	solute carrier family 12, member 8	NM_001195483; NM_024628; ENST00000393469; ENST00000430155; ENST00000461616; ENST00000462437; ENST00000465475; ENST00000465777; ENST00000469902; ENST00000473262; ENST00000479231; ENST00000479352; ENST00000479826; ENST00000481760; ENST00000483944; ENST00000485849; ENST00000485954; ENST00000495105; BC126158; BC126160; OTTHUMT00000355711; OTTHUMT00000355712; OTTHUMT00000355713; OTTHUMT00000355870; OT…	RefSeq; ENSEMBL; GenBank; Havana transcript; UCSC Genes; ccdsGene; circbase; Ace View; lncRNAWiki; NONCODE	chr3	coding
TC0600014085.hg.1	-2.25987	0.00783143	85235	HIST1H2AH	histone cluster 1, H2ah	NM_080596; ENST00000377459; BC093849; BC093851; BC134366; BC148293; CCDS4622.1; uc003niz.5; OTTHUMT00000040136	RefSeq; ENSEMBL; GenBank; ccdsGene; UCSC Genes; Havana transcript	chr6	coding
TC0600008697.hg.1	-2.25919	0.000519441	4907	NT5E	5-nucleotidase, ecto (CD73)	NM_001204813; NM_002526; ENST00000257770; ENST00000369646; ENST00000369651; ENST00000416334; ENST00000437581; BC065937; OTTHUMT00000041388; OTTHUMT00000041389; OTTHUMT00000041390; OTTHUMT00000041391; uc010kbr.3; CCDS5002.1; CCDS56439.1; hsa_circ_0077231; hsa_circ_0077232; uc003pkn.4; uc003pko.5; uc063pwp.1; uc063pwq.1	RefSeq; ENSEMBL; GenBank; Havana transcript; UCSC Genes; ccdsGene; circbase	chr6	coding
TC1100007840.hg.1	-2.25885	0.175565	10647	SCGB1D2	secretoglobin, family 1D, member 2	NM_006551; ENST00000244926; BC069290; BC104838; BC104840; OTTHUMT00000394859; CCDS8017.1; uc001ntb.4	RefSeq; ENSEMBL; GenBank; Havana transcript; ccdsGene; UCSC Genes	chr11	coding
TC0800007366.hg.1	-2.25506	0.0117854	203100	HTRA4	HtrA serine peptidase 4	NM_153692; ENST00000302495; BC057765; OTTHUMT00000377077; CCDS6110.1; uc003xmj.4	RefSeq; ENSEMBL; GenBank; Havana transcript; ccdsGene; UCSC Genes	chr8	coding
TC0200007049.hg.1	-2.24623	0.0434914	54867	TMEM214	transmembrane protein 214	NM_001083590; NM_017727; ENST00000238788; ENST00000321326; ENST00000404032; ENST00000425720; ENST00000434544; ENST00000435172; ENST00000444135; ENST00000460665; ENST00000460904; ENST00000469445; ENST00000475258; ENST00000478980; ENST00000495312; BC068479; OTTHUMT00000324748; OTTHUMT00000324749; OTTHUMT00000324750; OTTHUMT00000324751; OTTHUMT00000324752; OTTHUMT00000324753; OTTHUMT00000324754; OTT…	RefSeq; ENSEMBL; GenBank; Havana transcript; ccdsGene; circbase; Ace View; UCSC Genes; lncRNAWiki; NONCODE	chr2	coding
TC1400007566.hg.1	-2.24506	0.00317722	64093	SMOC1	SPARC related modular calcium binding 1	NM_001034852; NM_022137; ENST00000361956; ENST00000381280; ENST00000553839; ENST00000555917; ENST00000557483; BC008608; BC011548; OTTHUMT00000412465; OTTHUMT00000412466; OTTHUMT00000412467; OTTHUMT00000412468; OTTHUMT00000412469; CCDS32110.1; CCDS9798.1; hsa_circ_0032356; hsa_circ_0032357; hsa_circ_0032358; hsa_circ_0032359; hsa_circ_0032360; hsa_circ_0032361; hsa_circ_0032362; hsa_circ_0032363; …	RefSeq; ENSEMBL; GenBank; Havana transcript; ccdsGene; circbase; UCSC Genes; lncRNAWiki; NONCODE	chr14	coding
TC0700008389.hg.1	-2.24393	0.386795	51666	ASB4	ankyrin repeat and SOCS box containing 4	NM_016116; NM_145872; ENST00000257621; ENST00000325885; ENST00000428113; BC113479; BC113481; OTTHUMT00000333225; OTTHUMT00000333226; OTTHUMT00000333227; uc003unx.3; BC111594; CCDS5641.1; CCDS5642.1; uc011kij.3; uc064fnl.1; NONHSAT122080	RefSeq; ENSEMBL; GenBank; Havana transcript; UCSC Genes; ccdsGene; lncRNAWiki; NONCODE	chr7	coding
TC1700006464.hg.1	-2.24275	0.0736994	79850	FAM57A	family with sequence similarity 57, member A	NM_024792; ENST00000301324; ENST00000308278; ENST00000570699; ENST00000570892; ENST00000572018; ENST00000574327; ENST00000577008; BC026023; OTTHUMT00000437154; OTTHUMT00000437155; OTTHUMT00000437156; OTTHUMT00000437157; OTTHUMT00000437158; OTTHUMT00000437159; OTTHUMT00000437160; CCDS10996.1; FAM57A.cAug10; FAM57A.eAug10; hsa_circ_0041171; uc002frp.4; uc002frq.4; uc002frr.4; uc059zbl.1; uc059zbm.1…	RefSeq; ENSEMBL; GenBank; Havana transcript; ccdsGene; Ace View; circbase; UCSC Genes; lncRNAWiki; NONCODE	chr17	coding
TC0Y00006688.hg.1	-2.2425	0.0487525		XKRY2; XKRY	Homo sapiens XK, Kell blood group complex subunit-related, Y-linked 2 (XKRY2), mRNA.; Homo sapiens XK, Kell blood group complex subunit-related, Y-linked (XKRY), mRNA.; Homo sapiens XK, Kell blood group complex subunit-related, Y-linked, mRNA (cDNA clone MGC:164514 IMAGE:40146905), complete cds.; Homo sapiens XK, Kell blood group complex subunit-related, Y-linked, mRNA (cDNA clone MGC:164516 IMAG…	NM_001002906_2; NM_004677_2; BC132883_2; BC132885_2; BC132901_2; BC132903_2; BC148772_2; BC153173_2; XKRY2.aAug10-unspliced; ENST00000442362; ENST00000623874; OTTHUMT00000100009; OTTHUMT00000479359	RefSeq; GenBank; Ace View; ENSEMBL; Havana transcript	chrY	ncrna
TC1000012066.hg.1	-2.2414	0.0287664	54780	NSMCE4A	NSE4 homolog A, SMC5-SMC6 complex component	NM_001167865; NM_017615; ENST00000369017; ENST00000369023; ENST00000459911; ENST00000464321; ENST00000465189; ENST00000468209; ENST00000472431; ENST00000477289; ENST00000481320; ENST00000483541; ENST00000489266; BC005212; BC062427; OTTHUMT00000050745; OTTHUMT00000050746; OTTHUMT00000050748; OTTHUMT00000050749; OTTHUMT00000050750; OTTHUMT00000050751; OTTHUMT00000050752; OTTHUMT00000050753; OTTHUMT…	RefSeq; ENSEMBL; GenBank; Havana transcript; ccdsGene; circbase; Ace View; UCSC Genes; lncRNAWiki; NONCODE	chr10	coding
TC0400007799.hg.1	-2.24083	0.00776685	8671	SLC4A4	solute carrier family 4 (sodium bicarbonate cotransporter), member 4	NM_001098484; NM_001134742; NM_003759; ENST00000264485; ENST00000340595; ENST00000351898; ENST00000425175; ENST00000512686; ENST00000514331; BC030977; OTTHUMT00000252158; OTTHUMT00000362090; OTTHUMT00000362091; OTTHUMT00000362107; OTTHUMT00000362108; uc003hgc.4; uc010iic.3; CCDS3549.1; CCDS43236.1; CCDS47071.1; hsa_circ_0008676; hsa_circ_0069922; hsa_circ_0069923; hsa_circ_0069924; hsa_circ_00699…	RefSeq; ENSEMBL; GenBank; Havana transcript; UCSC Genes; ccdsGene; circbase; Ace View; Guo	chr4	coding
TC1000009865.hg.1	-2.23281	0.00118874		FAM107B	Memczak2013 ALT_ACCEPTOR, ALT_DONOR, coding, INTERNAL, intronic best transcript NM_031453	hsa_circ_0000217	circbase	chr10	ncrna
TC1300009249.hg.1	-2.23226	0.0328248	11278	KLF12	Kruppel-like factor 12	NM_007249; ENST00000377666; ENST00000377669; ENST00000472022; BC019680; OTTHUMT00000045271; OTTHUMT00000045272; CCDS9449.1; hsa_circ_0005783; hsa_circ_0008556; hsa_circ_0030412; hsa_circ_0030413; hsa_circ_0030414; hsa_circ_0030415; hsa_circ_0030416; hsa_circ_0030417; uc058xlm.1; uc058xln.1; uc058xlp.1	RefSeq; ENSEMBL; GenBank; Havana transcript; ccdsGene; circbase; UCSC Genes	chr13	coding
TSUnmapped00000175.hg.1	-2.22868	0.0349383	4705	NDUFA10	NADH dehydrogenase (ubiquinone) 1 alpha subcomplex, 10, 42kDa	ENST00000627686	ENSEMBL		coding
TC0100017664.hg.1	-2.22835	0.121944	55746	NUP133	nucleoporin 133kDa	NM_018230; ENST00000261396; ENST00000366678; ENST00000485119; ENST00000490352; BC020107; OTTHUMT00000095224; OTTHUMT00000095226; OTTHUMT00000095227; OTTHUMT00000095228; CCDS1579.1; ENST00000434311.1; hsa_circ_0003896; hsa_circ_0016790; hsa_circ_0016791; hsa_circ_0016792; hsa_circ_0016793; hsa_circ_0016794; hsa_circ_0016795; hsa_circ_0016796; hsa_circ_0016797; hsa_circ_0016798; hsa_circ_0016799; h…	RefSeq; ENSEMBL; GenBank; Havana transcript; ccdsGene; lncRNAWiki; circbase; Ace View; UCSC Genes; Guo; RNACentral; NONCODE	chr1	coding
TC0700010167.hg.1	-2.2265	0.11327	60	ACTB	actin, beta	NM_001101; ENST00000331789; ENST00000414620; ENST00000417101; ENST00000425660; ENST00000432588; ENST00000443528; ENST00000462494; ENST00000464611; ENST00000473257; ENST00000477812; ENST00000480301; ENST00000484841; ENST00000493945; BC001301; BC002409; BC004251; BC013380; BC014861; BC016045; OTTHUMT00000059589; OTTHUMT00000324020; OTTHUMT00000324021; OTTHUMT00000324022; OTTHUMT00000324023; OTTHUMT…	RefSeq; ENSEMBL; GenBank; Havana transcript; Ace View; ccdsGene; circbase; UCSC Genes; lncRNAWiki; NONCODE	chr7	coding
TC0600011403.hg.1	-2.22472	0.202925	170680	PSORS1C2	psoriasis susceptibility 1 candidate 2	NM_014069; ENST00000259845; OTTHUMT00000076115; BC172314; CCDS4694.1; PSORS1C2.aAug10; uc003nso.5	RefSeq; ENSEMBL; Havana transcript; GenBank; ccdsGene; Ace View; UCSC Genes	chr6	coding
TC0300011423.hg.1	-2.22201	0.0336274	26018	LRIG1	leucine-rich repeats and immunoglobulin-like domains 1	NM_015541; ENST00000273261; ENST00000383703; ENST00000475366; ENST00000491821; ENST00000495037; ENST00000495671; ENST00000496559; ENST00000497721; ENST00000498287; BC071561; BC140907; OTTHUMT00000351930; OTTHUMT00000351931; OTTHUMT00000351933; OTTHUMT00000351934; OTTHUMT00000351935; OTTHUMT00000351936; OTTHUMT00000351937; OTTHUMT00000351938; OTTHUMT00000351939; CCDS33783.1; hsa_circ_0001318; hsa_…	RefSeq; ENSEMBL; GenBank; Havana transcript; ccdsGene; circbase; Ace View; UCSC Genes; lncRNAWiki; NONCODE	chr3	coding
TC0300009353.hg.1	-2.21743	0.0552485	151742	PPM1L	protein phosphatase, Mg2+/Mn2+ dependent, 1L	NM_139245; ENST00000295839; ENST00000464260; ENST00000480117; ENST00000497343; ENST00000498165; BC104885; BC104887; OTTHUMT00000353019; OTTHUMT00000353020; OTTHUMT00000353021; OTTHUMT00000353022; OTTHUMT00000353023; CCDS33886.1; PPM1L.aAug10; uc003fds.4; uc003fdt.4; uc003fdu.4; uc010hwf.4; uc062ppi.1; NONHSAT093004	RefSeq; ENSEMBL; GenBank; Havana transcript; ccdsGene; Ace View; UCSC Genes; lncRNAWiki; NONCODE	chr3	coding
TC2000007329.hg.1	-2.21679	0.10294	79913	ACTR5	ARP5 actin-related protein 5 homolog (yeast)	NM_024855; ENST00000243903; BC038402; OTTHUMT00000079205; CCDS13308.1; hsa_circ_0060348; uc002xjd.3	RefSeq; ENSEMBL; GenBank; Havana transcript; ccdsGene; circbase; UCSC Genes	chr20	coding
TC2200009231.hg.1	-2.2117	0.00538452	4282	MIF	macrophage migration inhibitory factor (glycosylation-inhibiting factor)	NM_002415; ENST00000215754; ENST00000465752; ENST00000498385; BC000447; BC007676; BC008914; BC013976; BC022414; BC053376; OTTHUMT00000320009; OTTHUMT00000320010; OTTHUMT00000320011; CCDS13819.1; hsa_circ_0062567; uc002zyr.2; uc062cic.1; uc062cid.1	RefSeq; ENSEMBL; GenBank; Havana transcript; ccdsGene; circbase; UCSC Genes	chr22	coding
TC0300014082.hg.1	-2.20914	0.031914	2119	ETV5	ets variant 5	NM_004454; ENST00000306376; ENST00000413301; ENST00000421809; ENST00000422039; ENST00000433149; ENST00000434744; ENST00000440773; ENST00000472868; ENST00000475484; ENST00000476890; ENST00000480706; ENST00000484223; ENST00000489830; ENST00000495808; BC007333; OTTHUMT00000344947; OTTHUMT00000344948; OTTHUMT00000344949; OTTHUMT00000344950; OTTHUMT00000344951; OTTHUMT00000344952; OTTHUMT00000344953; …	RefSeq; ENSEMBL; GenBank; Havana transcript; ccdsGene; Ace View; circbase; UCSC Genes; lncRNAWiki; NONCODE	chr3	coding
TC0X00006631.hg.1	-2.20465	0.000494862	7114	TMSB4X	thymosin beta 4, X-linked	NM_021109; ENST00000380633; ENST00000380635; ENST00000380636; ENST00000451311; BC101790; BC101792; BC104464; BC104465; BC128102; BC128103; BC139925; BC141975; BC141976; BC151215; OTTHUMT00000055779; OTTHUMT00000055780; OTTHUMT00000055781; OTTHUMT00000055782; CCDS35202.1; hsa_circ_0003416; hsa_circ_0003687; hsa_circ_0089891; hsa_circ_0089892; hsa_circ_0089893; hsa_circ_0089894; uc004cvf.4; uc064xz…	RefSeq; ENSEMBL; GenBank; Havana transcript; ccdsGene; circbase; UCSC Genes	chrX	coding
TC1900008279.hg.1	-2.20177	0.0112185	602; 102465879	BCL3; MIR8085	B-cell CLL/lymphoma 3; microRNA 8085	NM_005178; NR_107052; ENST00000164227; ENST00000403534; ENST00000444487; ENST00000464319; ENST00000473468; ENST00000473473; ENST00000474300; ENST00000477832; ENST00000487394; ENST00000612079; BC064993; OTTHUMT00000322976; OTTHUMT00000322977; OTTHUMT00000322978; OTTHUMT00000322979; OTTHUMT00000322980; OTTHUMT00000322981; OTTHUMT00000322982; OTTHUMT00000322983; OTTHUMT00000322984; BCL3.hAug10; CCDS…	RefSeq; ENSEMBL; GenBank; Havana transcript; Ace View; ccdsGene; circbase; UCSC Genes; lncRNAWiki; NONCODE; RNACentral	chr19	coding
TC0300010040.hg.1	-2.19788	0.101566	152217	NCBP2-AS2	NCBP2 antisense RNA 2 (head to head)	NR_024388; ENST00000602845.1; uc062sdb.1; ENST00000602845; HG496612.1:1..918:ncRNA; NONHSAT094370; NONHSAT094371; OTTHUMT00000468038	RefSeq; lncRNAWiki; UCSC Genes; ENSEMBL; RNACentral; NONCODE; Havana transcript	chr3	ncrna
TC0600009534.hg.1	-2.19133	0.00128027	4602	MYB	v-myb avian myeloblastosis viral oncogene homolog	NM_001130172; NM_001130173; NM_001161656; NM_001161657; NM_001161658; NM_001161659; NM_001161660; NM_005375; ENST00000316528; ENST00000339290; ENST00000341911; ENST00000367812; ENST00000367814; ENST00000420123; ENST00000430686; ENST00000438901; ENST00000442647; ENST00000463282; ENST00000524588; ENST00000525002; ENST00000525369; ENST00000525477; ENST00000525514; ENST00000525940; ENST00000526187; E…	RefSeq; ENSEMBL; GenBank; Havana transcript; ccdsGene; circbase; Ace View; UCSC Genes; NONCODE; lncRNAWiki	chr6	coding
TC1100012315.hg.1	-2.18642	0.00790773	26521	TIMM8B	translocase of inner mitochondrial membrane 8 homolog B (yeast)	NM_012459; NR_028383; ENST00000504148; ENST00000507614; ENST00000509359; ENST00000541231; BC000711; BC105986; BC106067; OTTHUMT00000368270; OTTHUMT00000368271; OTTHUMT00000368272; CCDS8357.2; uc001pmx.5; uc001pmy.5; uc058hho.1; uc058hhp.1; NONHSAT024181	RefSeq; ENSEMBL; GenBank; Havana transcript; ccdsGene; UCSC Genes; lncRNAWiki; NONCODE	chr11	coding
TC0400012644.hg.1	-2.18314	0.222865	8470	SORBS2	sorbin and SH3 domain containing 2	NM_001145670; NM_001145671; NM_001145672; NM_001145673; NM_001145674; NM_001145675; NM_001270771; NM_003603; NM_021069; ENST00000284776; ENST00000319454; ENST00000319471; ENST00000355634; ENST00000393523; ENST00000393528; ENST00000414724; ENST00000415274; ENST00000418609; ENST00000419063; ENST00000420158; ENST00000421420; ENST00000421639; ENST00000425679; ENST00000428330; ENST00000429056; ENST000…	RefSeq; ENSEMBL; GenBank; Havana transcript; UCSC Genes; ccdsGene; circbase; Ace View	chr4	coding
TC1700012423.hg.1	-2.18072	0.101024	55073	LRRC37A4P	leucine rich repeat containing 37, member A4, pseudogene	BC107850; NR_002940_3; ENST00000579913; NONHSAT054126; NONHSAT054130; NONHSAT054131; NONHSAT054132; NONHSAT054137; NONHSAT146906; OTTHUMT00000445300	GenBank; RefSeq; ENSEMBL; lncRNAWiki; NONCODE; Havana transcript	chr17	ncrna
TC0600011957.hg.1	-2.174	0.0122816	266977	ADGRF1	adhesion G protein-coupled receptor F1	NM_025048; NM_153840; ENST00000283297; ENST00000371243; ENST00000371253; ENST00000419892; ENST00000449332; ENST00000471487; ENST00000474800; ENST00000475745; ENST00000477771; ENST00000477858; ENST00000487323; ENST00000491283; ENST00000493249; BC160016; CCDS34471.1; CCDS4920.1; GPR110.jAug10; uc003oyt.4; uc003oyu.2; uc063oxw.1; uc063oxx.1; uc063oxy.1; uc063oxz.1; uc063oya.1; uc063oyb.1; uc063oyc.1…	RefSeq; ENSEMBL; GenBank; ccdsGene; Ace View; UCSC Genes; lncRNAWiki; NONCODE; Havana transcript	chr6	coding
TC1100013081.hg.1	-2.17321	0.0201747	2526	FUT4	fucosyltransferase 4 (alpha (1,3) fucosyltransferase, myeloid-specific)	NM_002033; ENST00000358752; BC136373; BC136374; OTTHUMT00000396327; CCDS8301.1; uc001pez.4	RefSeq; ENSEMBL; GenBank; Havana transcript; ccdsGene; UCSC Genes	chr11	coding
TC0X00011181.hg.1	-2.16978	0.0107067	3054	HCFC1	host cell factor C1	NM_005334; ENST00000310441; ENST00000369984; ENST00000444191; ENST00000461098; OTTHUMT00000061099; OTTHUMT00000061100; OTTHUMT00000061101; OTTHUMT00000280573; CCDS44020.1; GU014839; hsa_circ_0091800; hsa_circ_0091801; hsa_circ_0091802; hsa_circ_0091803; hsa_circ_0091804; hsa_circ_0091805; hsa_circ_0091806; hsa_circ_0091807; hsa_circ_0091808; hsa_circ_0091809; hsa_circ_0091810; hsa_circ_0091811; h…	RefSeq; ENSEMBL; Havana transcript; ccdsGene; GenBank; circbase; UCSC Genes; lncRNAWiki	chrX	coding
TC1700010223.hg.1	-2.16966	0.0752372	124925	SEZ6	seizure related 6 homolog (mouse)	NM_001098635; NM_001290202; NM_178860; ENST00000317338; ENST00000335960; ENST00000360295; ENST00000442608; ENST00000535262; ENST00000539265; ENST00000540419; ENST00000540632; ENST00000544224; ENST00000585644; OTTHUMT00000397474; OTTHUMT00000397475; OTTHUMT00000397478; OTTHUMT00000397483; OTTHUMT00000397488; OTTHUMT00000397489; OTTHUMT00000448617; OTTHUMT00000448618; OTTHUMT00000448619; CCDS45638.…	RefSeq; ENSEMBL; Havana transcript; ccdsGene; UCSC Genes	chr17	coding
TC0100017145.hg.1	-2.16927	0.0148115	5362	PLXNA2	plexin A2	NM_025179; ENST00000367033; ENST00000460870; ENST00000463510; ENST00000480053; ENST00000483048; ENST00000486969; BC132676; BC136530; OTTHUMT00000088932; OTTHUMT00000088946; OTTHUMT00000088947; OTTHUMT00000088948; OTTHUMT00000088949; OTTHUMT00000088950; CCDS31013.1; hsa_circ_0002472; hsa_circ_0016311; PLXNA2.eAug10; uc001hgz.4; uc057paw.1; uc057pax.1; uc057pay.1; uc057paz.1; uc057pba.1; chr1_20838…	RefSeq; ENSEMBL; GenBank; Havana transcript; ccdsGene; circbase; Ace View; UCSC Genes; Guo; lncRNAWiki; NONCODE	chr1	coding
TC0700012780.hg.1	-2.16415	0.0124732	28996	HIPK2	homeodomain interacting protein kinase 2	NM_001113239; NM_022740; ENST00000342645; ENST00000406875; ENST00000428878; OTTHUMT00000349430; OTTHUMT00000349431; BC168360; CCDS75666.1; CCDS75667.1; hsa_circ_0001756; hsa_circ_0082665; hsa_circ_0082666; hsa_circ_0082667; hsa_circ_0082668; hsa_circ_0082669; hsa_circ_0082670; hsa_circ_0082671; hsa_circ_0082672; hsa_circ_0082673; hsa_circ_0082674; hsa_circ_0082675; hsa_circ_0082676; hsa_circ_0082…	RefSeq; ENSEMBL; Havana transcript; GenBank; ccdsGene; circbase; UCSC Genes; Guo; lncRNAWiki; NONCODE	chr7	coding
TC0500011705.hg.1	-2.15245	0.000646874	9315	NREP	neuronal regeneration related protein	NM_001142474; NM_001142475; NM_001142476; NM_001142477; NM_001142478; NM_001142479; NM_001142480; NM_001142481; NM_001142482; NM_001142483; NM_004772; ENST00000257435; ENST00000379671; ENST00000395634; ENST00000419114; ENST00000446294; ENST00000447165; ENST00000450761; ENST00000453526; ENST00000455559; ENST00000503429; ENST00000504018; ENST00000505864; ENST00000507032; ENST00000507742; ENST000005…	RefSeq; ENSEMBL; GenBank; Havana transcript; UCSC Genes; Ace View; ccdsGene; circbase; lncRNAWiki; NONCODE	chr5	coding
TC0200007348.hg.1	-2.1513	0.000847743	91461	PKDCC	protein kinase domain containing, cytoplasmic	NM_138370; ENST00000294964; ENST00000401498; ENST00000470578; ENST00000475241; ENST00000475868; ENST00000480099; ENST00000485578; ENST00000490302; ENST00000492861; BC094697; BC110513; BC110514; OTTHUMT00000325745; OTTHUMT00000325746; OTTHUMT00000325747; OTTHUMT00000325749; OTTHUMT00000325765; OTTHUMT00000325766; OTTHUMT00000325767; OTTHUMT00000325770; OTTHUMT00000325771; CCDS33186.2; uc002rsg.4; …	RefSeq; ENSEMBL; GenBank; Havana transcript; ccdsGene; UCSC Genes; Guo; lncRNAWiki; NONCODE	chr2	coding
TC1500010887.hg.1	-2.15056	0.00920391	54982	CLN6	ceroid-lipofuscinosis, neuronal 6, late infantile, variant	NM_017882; ENST00000249806; ENST00000538696; ENST00000563917; ENST00000564752; ENST00000564846; ENST00000565471; ENST00000566347; ENST00000567060; ENST00000569336; BC010849; BC013130; OTTHUMT00000257066; OTTHUMT00000419722; OTTHUMT00000419723; OTTHUMT00000419724; OTTHUMT00000419725; OTTHUMT00000419726; OTTHUMT00000419727; OTTHUMT00000419728; OTTHUMT00000419729; uc002arf.3; CCDS10227.1; CLN6andCAL…	RefSeq; ENSEMBL; GenBank; Havana transcript; UCSC Genes; ccdsGene; Ace View; circbase; lncRNAWiki; NONCODE	chr15	coding
TC1100013022.hg.1	-2.14615	0.0135313	9415	FADS2	fatty acid desaturase 2	NM_001281501; NM_001281502; NM_004265; ENST00000257261; ENST00000278840; ENST00000355484; ENST00000517312; ENST00000517839; ENST00000518606; ENST00000520145; ENST00000521571; ENST00000521849; ENST00000522056; ENST00000522359; ENST00000522639; ENST00000523235; ENST00000543584; BC009011; OTTHUMT00000375581; OTTHUMT00000375582; OTTHUMT00000375583; OTTHUMT00000375584; OTTHUMT00000375585; OTTHUMT00000…	RefSeq; ENSEMBL; GenBank; Havana transcript; ccdsGene; Ace View; circbase; UCSC Genes; lncRNAWiki; NONCODE	chr11	coding
TC1000011025.hg.1	-2.14468	0.0523251	5532	PPP3CB	protein phosphatase 3, catalytic subunit, beta isozyme	NM_001142353; NM_001142354; NM_001289968; NM_001289969; NM_021132; ENST00000342558; ENST00000360663; ENST00000394828; ENST00000394829; ENST00000430762; ENST00000495897; BC028049; OTTHUMT00000048669; OTTHUMT00000048670; OTTHUMT00000048671; OTTHUMT00000048672; CCDS44436.1; CCDS44437.1; CCDS7328.1; hsa_circ_0018811; hsa_circ_0018812; hsa_circ_0018813; hsa_circ_0018814; hsa_circ_0018815; uc001jue.4; …	RefSeq; ENSEMBL; GenBank; Havana transcript; ccdsGene; circbase; UCSC Genes; lncRNAWiki; NONCODE	chr10	coding
TC0200016300.hg.1	-2.13461	0.115636	389090	OR6B2	olfactory receptor, family 6, subfamily B, member 2	NM_001005853; ENST00000402971; BC137561; BC137562; OTTHUMT00000326079; CCDS46559.1; uc010zoc.3	RefSeq; ENSEMBL; GenBank; Havana transcript; ccdsGene; UCSC Genes	chr2	coding
TC0300010026.hg.1	-2.12911	0.243269	200933	FBXO45	F-box protein 45	NM_001105573; ENST00000311630; ENST00000440469; OTTHUMT00000340687; OTTHUMT00000340688; BC172382; CCDS46985.1; uc010iai.4; uc062sbv.1	RefSeq; ENSEMBL; Havana transcript; GenBank; ccdsGene; UCSC Genes	chr3	coding
TC1900006502.hg.1	-2.12798	0.0204602	57418	WDR18	WD repeat domain 18	NM_024100; ENST00000251289; ENST00000585809; ENST00000586317; ENST00000587001; ENST00000590354; ENST00000590397; ENST00000591155; ENST00000591276; ENST00000591985; ENST00000591997; ENST00000607440; BC000040; BC001648; OTTHUMT00000458225; OTTHUMT00000458226; OTTHUMT00000458227; OTTHUMT00000458229; OTTHUMT00000458230; OTTHUMT00000458683; OTTHUMT00000474026; OTTHUMT00000474027; OTTHUMT00000474028; O…	RefSeq; ENSEMBL; GenBank; Havana transcript; ccdsGene; circbase; UCSC Genes; Ace View; lncRNAWiki; NONCODE	chr19	coding
TC1800008605.hg.1	-2.1277	0.181045	9063	PIAS2	protein inhibitor of activated STAT 2	ENST00000590944; OTTHUMT00000445731; uc060owo.1; zotoybu.aAug10; NONHSAT059150	ENSEMBL; Havana transcript; UCSC Genes; Ace View; lncRNAWiki; NONCODE	chr18	coding
TC1500009756.hg.1	-2.12536	0.124946	348093	RBPMS2	RNA binding protein with multiple splicing 2	NM_194272; ENST00000300069; ENST00000560606; OTTHUMT00000418465; OTTHUMT00000418466; BC172373; CCDS32271.1; uc002anq.4; uc059kgz.1	RefSeq; ENSEMBL; Havana transcript; GenBank; ccdsGene; UCSC Genes	chr15	coding
TC0200006757.hg.1	-2.12265	0.251064	28951	TRIB2	tribbles pseudokinase 2	NM_021643; NR_027303; ENST00000155926; ENST00000381465; ENST00000405331; ENST00000483034; BC002637; OTTHUMT00000207114; OTTHUMT00000280497; OTTHUMT00000323584; OTTHUMT00000323585; CCDS1683.1; hsa_circ_0052679; hsa_circ_0052680; uc002rbv.5; uc010yjp.3; uc061gty.1; uc061gtz.1; NONHSAT069233	RefSeq; ENSEMBL; GenBank; Havana transcript; ccdsGene; circbase; UCSC Genes; lncRNAWiki; NONCODE	chr2	coding
TC0200012374.hg.1	-2.12241	0.0951331	170850	KCNG3	potassium channel, voltage gated modifier subfamily G, member 3	NM_133329; NM_172344; ENST00000306078; ENST00000394973; BC071558; OTTHUMT00000250464; OTTHUMT00000250465; uc002rsn.3; CCDS1809.1; CCDS42674.1; KCNG3.aAug10; KCNG3.bAug10; uc002rsm.4	RefSeq; ENSEMBL; GenBank; Havana transcript; UCSC Genes; ccdsGene; Ace View	chr2	coding
TC1100007430.hg.1	-2.12089	0.00193645	120071	GYLTL1B	glycosyltransferase-like 1B	NM_001300721; NM_001300722; NM_152312; ENST00000325468; ENST00000401752; ENST00000414027; ENST00000525609; ENST00000528236; ENST00000529052; ENST00000530437; ENST00000531526; ENST00000531847; ENST00000534410; ENST00000536139; BC037291; OTTHUMT00000392571; OTTHUMT00000392572; OTTHUMT00000392573; OTTHUMT00000392574; OTTHUMT00000392575; OTTHUMT00000392576; OTTHUMT00000392577; OTTHUMT00000392578; OTT…	RefSeq; ENSEMBL; GenBank; Havana transcript; UCSC Genes; ccdsGene; Ace View; lncRNAWiki; NONCODE	chr11	coding
TC0100012732.hg.1	-2.1195	0.0180276	10911	UTS2	urotensin 2	NM_006786; NM_021995; ENST00000054668; ENST00000361696; ENST00000377516; BC126443; OTTHUMT00000003611; OTTHUMT00000003612; OTTHUMT00000003613; CCDS90.1; CCDS91.1; uc001aor.4; uc001aos.4; uc057bxy.1; UTS2.dAug10	RefSeq; ENSEMBL; GenBank; Havana transcript; ccdsGene; UCSC Genes; Ace View	chr1	coding
TC0400008628.hg.1	-2.11701	0.00627538	10252	SPRY1	sprouty RTK signaling antagonist 1	NM_001258038; NM_001258039; NM_005841; NM_199327; ENST00000339241; ENST00000394339; ENST00000505319; ENST00000507703; ENST00000508849; ENST00000515726; ENST00000610581; ENST00000622283; BC063856; OTTHUMT00000256711; OTTHUMT00000363944; OTTHUMT00000363945; OTTHUMT00000363946; OTTHUMT00000363947; OTTHUMT00000363948; CCDS3731.1; uc003ifa.5; uc003ifb.5; uc031sgy.1; uc031sgz.1; uc062zku.1; uc062zkv.1;…	RefSeq; ENSEMBL; GenBank; Havana transcript; ccdsGene; UCSC Genes; lncRNAWiki; NONCODE	chr4	coding
TC0700007426.hg.1	-2.1146	0.0128811	107	ADCY1	adenylate cyclase 1 (brain)	NM_001281768; NM_021116; ENST00000297323; ENST00000432715; ENST00000468353; ENST00000621543; OTTHUMT00000340055; OTTHUMT00000340056; OTTHUMT00000340057; uc003tnd.3; ADCY1.aAug10; CCDS34631.1; CCDS75593.1; hsa_circ_0080120; hsa_circ_0080121; uc003tne.5; uc064dmb.1; uc064dmc.1; chr7_45688268_45701813; NONHSAT120448	RefSeq; ENSEMBL; Havana transcript; UCSC Genes; Ace View; ccdsGene; circbase; Guo; lncRNAWiki; NONCODE	chr7	coding
TC0600011228.hg.1	-2.11393	0.00923518	8330	HIST1H2AK	histone cluster 1, H2ak	NM_003510; ENST00000618958; BC034487; BC104198; BC104199; OTTHUMT00000043814; CCDS4632.1; uc003njs.4	RefSeq; ENSEMBL; GenBank; Havana transcript; ccdsGene; UCSC Genes	chr6	coding
TC1100008821.hg.1	-2.11186	0.0896375	390245	KDM4E	lysine (K)-specific demethylase 4E	NM_001161630; ENST00000450979; BC157851; BC157889; BC171916; uc010ruf.1; CCDS44713.1; KDM4DL.aAug10-unspliced; OTTHUMT00000396649	RefSeq; ENSEMBL; GenBank; UCSC Genes; ccdsGene; Ace View; Havana transcript	chr11	coding
TC0900010056.hg.1	-2.10855	0.0170105	253650; 100289137	ANKRD18A; FAM95C	ankyrin repeat domain 18A; family with sequence similarity 95, member C	NM_147195; NR_047651; ENST00000399703; ENST00000475234; ENST00000562942; ENST00000602295; ENST00000607974; ENST00000625242; BC152434; OTTHUMT00000052506; OTTHUMT00000052507; OTTHUMT00000467992; CCDS55311.1; ENST00000562942.1; ENST00000566538.1; ENST00000567428.2; hsa_circ_0087094; LOC100289137.fAug10; LOC100289137.lAug10; OTTHUMT00000420104; OTTHUMT00000472991; OTTHUMT00000472992; OTTHUMT00000481…	RefSeq; ENSEMBL; GenBank; Havana transcript; ccdsGene; lncRNAWiki; circbase; Ace View; UCSC Genes; NONCODE; RNACentral	chr9	coding
TC0300011485.hg.1	-2.10736	0.00806411	27086	FOXP1	forkhead box P1	NM_001012505; NM_001244808; NM_001244810; NM_001244812; NM_001244813; NM_001244814; NM_001244815; NM_001244816; NM_032682; ENST00000318779; ENST00000318789; ENST00000327590; ENST00000460805; ENST00000468577; ENST00000470112; ENST00000471386; ENST00000472382; ENST00000475937; ENST00000484350; ENST00000485326; ENST00000491238; ENST00000493010; ENST00000493089; ENST00000497355; ENST00000497553; ENST…	RefSeq; ENSEMBL; Havana transcript; ccdsGene; Ace View; circbase; UCSC Genes; Guo; lncRNAWiki; NONCODE	chr3	coding
TC0700013223.hg.1	-2.1036	0.0705722		LMBR1	Transcript Identified by AceView, Entrez Gene ID(s) 64327	LMBR1.tAug10-unspliced	Ace View	chr7	ncrna
TC0500011228.hg.1	-2.1022	0.0863191	411	ARSB	arylsulfatase B	NM_000046; NM_198709; ENST00000264914; ENST00000396151; ENST00000521011; ENST00000521117; ENST00000521800; ENST00000565165; BC029051; OTTHUMT00000226932; OTTHUMT00000370424; OTTHUMT00000370425; OTTHUMT00000370426; OTTHUMT00000370427; OTTHUMT00000420804; CCDS4043.1; CCDS43334.1; hsa_circ_0008469; hsa_circ_0073116; hsa_circ_0073117; hsa_circ_0073118; hsa_circ_0073119; hsa_circ_0073120; hsa_circ_007…	RefSeq; ENSEMBL; GenBank; Havana transcript; ccdsGene; circbase; UCSC Genes; lncRNAWiki; NONCODE	chr5	coding
TC1600008301.hg.1	-2.10121	0.00163947	794	CALB2	calbindin 2	NM_001740; NM_007088; NR_027910; ENST00000302628; ENST00000349553; ENST00000467817; ENST00000490520; ENST00000562305; BC015484; OTTHUMT00000268988; OTTHUMT00000357353; OTTHUMT00000357354; OTTHUMT00000433790; CALB2.bAug10; CALB2.eAug10; CCDS10899.1; uc002faa.6; uc002fac.6; uc059wth.1; uc059wti.1; uc059wtj.1; NONHSAT143468	RefSeq; ENSEMBL; GenBank; Havana transcript; Ace View; ccdsGene; UCSC Genes; lncRNAWiki; NONCODE	chr16	coding
TC0800010142.hg.1	-2.10052	0.432723	137362	GOT1L1	glutamic-oxaloacetic transaminase 1-like 1	NM_152413; ENST00000307599; ENST00000518826; ENST00000524298; BC029504; OTTHUMT00000376823; OTTHUMT00000376824; OTTHUMT00000376825; CCDS47839.1; uc011lbj.2; uc064lyo.1; uc064lyp.1	RefSeq; ENSEMBL; GenBank; Havana transcript; ccdsGene; UCSC Genes	chr8	coding
TC1600007999.hg.1	-2.09915	0.0936239	6376	CX3CL1	chemokine (C-X3-C motif) ligand 1	NM_001304392; NM_002996; ENST00000006053; ENST00000563383; ENST00000564948; ENST00000565912; BC001163; BC016164; OTTHUMT00000257345; OTTHUMT00000430432; OTTHUMT00000430433; OTTHUMT00000430434; CCDS10779.1; CX3CL1.bAug10; CX3CL1.cAug10; uc002eli.4; uc032eax.2; uc059urj.1; uc059urk.1	RefSeq; ENSEMBL; GenBank; Havana transcript; ccdsGene; Ace View; UCSC Genes	chr16	coding
TC1100012513.hg.1	-2.09669	0.00725699	3014	H2AFX	H2A histone family, member X	NM_002105; ENST00000375167; ENST00000530167; BC004915; BC011694; BC013416; OTTHUMT00000388330; OTTHUMT00000442282; CCDS8410.1; uc001pvg.4; uc058ifs.1	RefSeq; ENSEMBL; GenBank; Havana transcript; ccdsGene; UCSC Genes	chr11	coding
TC1200007822.hg.1	-2.09637	0.114207	64375	IKZF4	IKAROS family zinc finger 4	NM_022465; ENST00000262032; ENST00000431367; ENST00000547167; ENST00000547556; ENST00000547668; ENST00000547791; ENST00000548601; ENST00000549519; ENST00000550860; ENST00000551103; ENST00000551124; ENST00000551701; ENST00000552689; OTTHUMT00000407590; OTTHUMT00000407591; OTTHUMT00000407592; OTTHUMT00000407593; OTTHUMT00000407594; OTTHUMT00000407595; OTTHUMT00000407596; OTTHUMT00000407597; OTTHUMT…	RefSeq; ENSEMBL; Havana transcript; UCSC Genes; GenBank; ccdsGene; Ace View; lncRNAWiki; NONCODE	chr12	coding
TC0600011227.hg.1	-2.09604	0.00163029	8362	HIST1H4K	histone cluster 1, H4k	NM_003541; ENST00000611927; OTTHUMT00000040156; BC146523_2; BC148271_2; BC153081_2; CCDS4631.1; uc003njr.4; BC111093; BC111434	RefSeq; ENSEMBL; Havana transcript; GenBank; ccdsGene; UCSC Genes	chr6	coding
TC0100008879.hg.1	-2.09056	0.00789095	148418	SAMD13	sterile alpha motif domain containing 13	NM_001010971; NM_001134663; NM_001134664; ENST00000370668; ENST00000370669; ENST00000370670; ENST00000370671; ENST00000370673; ENST00000394834; ENST00000454967; ENST00000463429; ENST00000479082; OTTHUMT00000027241; OTTHUMT00000027242; OTTHUMT00000027243; OTTHUMT00000027244; OTTHUMT00000027245; OTTHUMT00000027246; OTTHUMT00000027247; OTTHUMT00000337355; OTTHUMT00000337356; uc001djr.3; CCDS30760.1;…	RefSeq; ENSEMBL; Havana transcript; UCSC Genes; ccdsGene; Ace View; lncRNAWiki; NONCODE	chr1	coding
TC0500009587.hg.1	-2.08965	0.179255	192286	HIGD2A	HIG1 hypoxia inducible domain family, member 2A	NM_138820; ENST00000274787; BC007502; OTTHUMT00000253147; CCDS4401.1; hsa_circ_0075107; hsa_circ_0075108; hsa_circ_0075109; uc003meg.4	RefSeq; ENSEMBL; GenBank; Havana transcript; ccdsGene; circbase; UCSC Genes	chr5	coding
TC1800007595.hg.1	-2.08681	0.17065	79839	CCDC102B	coiled-coil domain containing 102B	NM_001093729; NM_024781; ENST00000319445; ENST00000358653; ENST00000360242; ENST00000577772; ENST00000577800; ENST00000578970; ENST00000580292; ENST00000581103; ENST00000581520; ENST00000582077; ENST00000582371; ENST00000584156; ENST00000584775; BC126448; BC126450; OTTHUMT00000256225; OTTHUMT00000442432; OTTHUMT00000442433; OTTHUMT00000442434; OTTHUMT00000442435; OTTHUMT00000442436; OTTHUMT000004…	RefSeq; ENSEMBL; GenBank; Havana transcript; UCSC Genes; Ace View; ccdsGene; circbase; Guo; lncRNAWiki; NONCODE	chr18	coding
TC2100008510.hg.1	-2.08174	0.404689	3772	KCNJ15	potassium channel, inwardly rectifying subfamily J, member 15	NM_001276435; NM_001276436; NM_001276437; NM_001276438; NM_001276439; NM_002243; NM_170736; NM_170737; ENST00000328656; ENST00000398925; ENST00000398927; ENST00000398928; ENST00000398930; ENST00000398932; ENST00000398934; ENST00000398938; ENST00000417042; ENST00000419868; ENST00000438657; ENST00000443341; ENST00000547341; ENST00000547595; ENST00000548700; ENST00000549158; ENST00000549805; ENST000…	RefSeq; ENSEMBL; GenBank; Havana transcript; ccdsGene; Ace View; UCSC Genes; lncRNAWiki; NONCODE	chr21	coding
TC0600007248.hg.1	-2.08063	0.340331	255626	HIST1H2BA	histone cluster 1, H2ba	NM_170610; ENST00000274764; BC066238; BC066239; BC066240; BC066241; BC066242; OTTHUMT00000040066; CCDS4563.1; uc003nfd.4	RefSeq; ENSEMBL; GenBank; Havana transcript; ccdsGene; UCSC Genes	chr6	coding
TC1100011514.hg.1	-2.07919	0.02376	1717	DHCR7	7-dehydrocholesterol reductase	NM_001163817; NM_001360; ENST00000355527; ENST00000407721; ENST00000525137; ENST00000525346; ENST00000526780; ENST00000527316; ENST00000527452; ENST00000529990; ENST00000531364; ENST00000533800; ENST00000534701; ENST00000534795; BC000054; OTTHUMT00000394241; OTTHUMT00000394242; OTTHUMT00000394243; OTTHUMT00000394244; OTTHUMT00000394246; OTTHUMT00000394248; OTTHUMT00000394249; OTTHUMT00000394250; …	RefSeq; ENSEMBL; GenBank; Havana transcript; ccdsGene; Ace View; circbase; UCSC Genes	chr11	coding
TC1600009731.hg.1	-2.07337	0.065733	91949	COG7	component of oligomeric golgi complex 7	NM_153603; ENST00000307149; ENST00000561854; ENST00000563164; ENST00000566364; ENST00000567821; ENST00000569635; BC000549; BC037563; OTTHUMT00000211625; OTTHUMT00000434818; OTTHUMT00000434819; OTTHUMT00000434820; OTTHUMT00000434821; OTTHUMT00000434822; CCDS10610.1; COG7.eAug10; hsa_circ_0002902; hsa_circ_0008072; hsa_circ_0038561; hsa_circ_0038562; hsa_circ_0038563; hsa_circ_0038564; hsa_circ_003…	RefSeq; ENSEMBL; GenBank; Havana transcript; ccdsGene; Ace View; circbase; UCSC Genes; Guo; lncRNAWiki; NONCODE	chr16	coding
TC0100009101.hg.1	-2.07316	0.0693986		ABCD3	Transcript Identified by AceView, Entrez Gene ID(s) 5825	ABCD3.rAug10-unspliced	Ace View	chr1	ncrna
TC1100007017.hg.1	-2.07213	0.206386	144110	TMEM86A	transmembrane protein 86A	NM_153347; ENST00000280734; ENST00000524888; ENST00000527002; ENST00000529240; ENST00000533987; BC035692; OTTHUMT00000387810; OTTHUMT00000387811; OTTHUMT00000387812; OTTHUMT00000387813; OTTHUMT00000387814; CCDS7844.1; TMEM86A.bAug10; TMEM86A.cAug10; uc001moz.2; uc057zst.1; uc057zsu.1; uc057zsv.1; uc057zsw.1; NONHSAT018311; NONHSAT018312; NONHSAT018313; NONHSAT018314	RefSeq; ENSEMBL; GenBank; Havana transcript; ccdsGene; Ace View; UCSC Genes; lncRNAWiki; NONCODE	chr11	coding
TC0Y00007331.hg.1	-2.07173	0.129117	114758	CSPG4P1Y	chondroitin sulfate proteoglycan 4 pseudogene 1, Y-linked	ENST00000306641; NR_001554_2; CSPG4P1Y.aAug10; ENST00000306641.1; OTTHUMT00000105037; uc004fxc.2; ENST00000333235; ENST00000419538; HG512883.1:1..795:ncRNA; NONHSAT139769; NONHSAT139770; OTTHUMT00000105039; OTTHUMT00000105040	ENSEMBL; RefSeq; Ace View; lncRNAWiki; Havana transcript; UCSC Genes; RNACentral; NONCODE	chrY	ncrna
TC0200010796.hg.1	-2.07154	0.0914915	58190	CTDSP1	CTD small phosphatase 1	NM_001206878; NM_021198; NM_182642; ENST00000273062; ENST00000428361; ENST00000431127; ENST00000443891; ENST00000452977; ENST00000464255; ENST00000473420; ENST00000482272; ENST00000488627; ENST00000491064; ENST00000492545; ENST00000494067; ENST00000496785; ENST00000497677; ENST00000498160; BC012977; OTTHUMT00000256774; OTTHUMT00000338190; OTTHUMT00000338191; OTTHUMT00000338192; OTTHUMT00000338193…	RefSeq; ENSEMBL; GenBank; Havana transcript; UCSC Genes; ccdsGene; Ace View; circbase; lncRNAWiki; NONCODE	chr2	coding
TC1900006552.hg.1	-2.06867	0.0443718	390874	ONECUT3	one cut homeobox 3	NM_001080488; ENST00000382349; OTTHUMT00000418499; CCDS45900.1; uc010xgr.3	RefSeq; ENSEMBL; Havana transcript; ccdsGene; UCSC Genes	chr19	coding
TC1200010917.hg.1	-2.06837	0.0433424	8914	TIMELESS	timeless circadian clock	NM_003920; ENST00000229201; ENST00000553314; ENST00000553532; ENST00000555808; ENST00000557589; BC050557; OTTHUMT00000409771; OTTHUMT00000409772; OTTHUMT00000409822; OTTHUMT00000410078; OTTHUMT00000410079; CCDS8918.1; hsa_circ_0000408; hsa_circ_0027010; hsa_circ_0027011; hsa_circ_0027012; hsa_circ_0027013; hsa_circ_0027014; hsa_circ_0027015; hsa_circ_0027016; hsa_circ_0027017; hsa_circ_0027018; T…	RefSeq; ENSEMBL; GenBank; Havana transcript; ccdsGene; circbase; Ace View; UCSC Genes; lncRNAWiki; NONCODE	chr12	coding
TC0300011119.hg.1	-2.06827	0.0280509	51161	C3orf18	chromosome 3 open reading frame 18	NM_001171740; NM_001171741; NM_001171743; NM_016210; ENST00000357203; ENST00000422619; ENST00000426034; ENST00000430746; ENST00000441239; ENST00000449241; ENST00000464080; ENST00000484982; ENST00000485902; ENST00000486175; ENST00000491269; BC034766; OTTHUMT00000346248; OTTHUMT00000346249; OTTHUMT00000346252; OTTHUMT00000346253; OTTHUMT00000346254; OTTHUMT00000346255; OTTHUMT00000346256; OTTHUMT00…	RefSeq; ENSEMBL; GenBank; Havana transcript; ccdsGene; UCSC Genes; lncRNAWiki; NONCODE	chr3	coding
TC0100013429.hg.1	-2.06754	0.0821021	8547	FCN3	ficolin (collagen/fibrinogen domain containing) 3	NM_003665; NM_173452; ENST00000270879; ENST00000354982; ENST00000481748; ENST00000498393; BC020731; OTTHUMT00000015667; OTTHUMT00000015668; OTTHUMT00000015669; OTTHUMT00000015670; CCDS300.1; CCDS301.1; uc001boa.4; uc001bob.4; uc057dvm.1; uc057dvn.1; NONHSAT001885	RefSeq; ENSEMBL; GenBank; Havana transcript; ccdsGene; UCSC Genes; lncRNAWiki; NONCODE	chr1	coding
TC0800011691.hg.1	-2.06611	0.246275	312	ANXA13	annexin A13	NM_001003954; NM_004306; ENST00000262219; ENST00000419625; ENST00000519045; ENST00000520519; ENST00000520591; ENST00000523822; BC125158; OTTHUMT00000381307; OTTHUMT00000381308; OTTHUMT00000381309; OTTHUMT00000381310; OTTHUMT00000381311; OTTHUMT00000381312; ANXA13.eAug10; CCDS34939.1; CCDS47917.1; uc003yqt.4; uc003yqu.4; uc064pyp.1; uc064pyq.1; uc064pyr.1; uc064pys.1; NONHSAT128564; NONHSAT128565	RefSeq; ENSEMBL; GenBank; Havana transcript; Ace View; ccdsGene; UCSC Genes; lncRNAWiki; NONCODE	chr8	coding
TC0600013165.hg.1	-2.06434	0.00128195	2037	EPB41L2	erythrocyte membrane protein band 4.1-like 2	NM_001135554; NM_001135555; NM_001199388; NM_001252660; NM_001431; ENST00000337057; ENST00000368126; ENST00000368128; ENST00000392427; ENST00000445890; ENST00000452150; ENST00000456097; ENST00000524581; ENST00000525193; ENST00000525198; ENST00000525271; ENST00000526333; ENST00000526782; ENST00000526983; ENST00000527017; ENST00000527411; ENST00000527423; ENST00000527659; ENST00000528179; ENST00000…	RefSeq; ENSEMBL; GenBank; Havana transcript; ccdsGene; Ace View; circbase; UCSC Genes; lncRNAWiki; NONCODE	chr6	coding
TC1200009875.hg.1	-2.06284	0.339028	160365	CLECL1	C-type lectin-like 1	NM_001253750; NM_001267701; NM_172004; ENST00000327839; ENST00000540988; ENST00000542530; ENST00000621400; BC093857; BC093859; OTTHUMT00000399813; OTTHUMT00000399814; OTTHUMT00000399815; CCDS73441.1; CCDS8603.1; uc001qwj.4; uc058lat.1; uc058lau.1; uc058lav.1	RefSeq; ENSEMBL; GenBank; Havana transcript; ccdsGene; UCSC Genes	chr12	coding
TC1900011382.hg.1	-2.05926	0.0148095		MYADM	Memczak2013 ANTISENSE, CDS, coding, INTERNAL best transcript NM_001020819	hsa_circ_0000954	circbase	chr19	ncrna
TC0100017420.hg.1	-2.05773	0.627427	11221	DUSP10	dual specificity phosphatase 10	NM_007207; NR_111939; NR_111940; ENST00000366899; ENST00000468085; ENST00000477026; ENST00000494642; BC031405; BC063826; OTTHUMT00000090716; OTTHUMT00000090717; OTTHUMT00000090718; OTTHUMT00000090719; CCDS1528.1; uc001hmy.3; uc057poy.1; uc057poz.1; uc057ppa.1	RefSeq; ENSEMBL; GenBank; Havana transcript; ccdsGene; UCSC Genes	chr1	coding
TC1300006811.hg.1	-2.05721	0.0172778		PDS5B	Memczak2013 ALT_ACCEPTOR, ALT_DONOR, coding, INTERNAL, intronic best transcript NM_015032	hsa_circ_0000472	circbase	chr13	ncrna
TC0X00009185.hg.1	-2.05708	0.203209	10389	SCML2	sex comb on midleg-like 2 (Drosophila)	NM_006089; NR_033717; ENST00000251900; ENST00000398048; ENST00000420857; ENST00000491988; BC064617; OTTHUMT00000055941; OTTHUMT00000055942; OTTHUMT00000055943; CCDS14185.1; hsa_circ_0089977; hsa_circ_0089978; hsa_circ_0089979; uc004cyl.3; uc064yfa.1; uc064yfb.1; uc064yfc.1; chrX_18265888_18275150; NONHSAT136413	RefSeq; ENSEMBL; GenBank; Havana transcript; ccdsGene; circbase; UCSC Genes; Guo; lncRNAWiki; NONCODE	chrX	coding
TC2200007407.hg.1	-2.05686	0.124353	8911	CACNA1I	calcium channel, voltage-dependent, T type, alpha 1I subunit	NM_001003406; NM_021096; ENST00000401624; ENST00000402142; ENST00000404898; ENST00000407673; ENST00000471970; OTTHUMT00000321290; OTTHUMT00000321291; OTTHUMT00000321292; OTTHUMT00000321293; OTTHUMT00000321294; CACNA1I.cAug10; CACNA1I.dAug10; CACNA1I.fAug10; CCDS46710.1; CCDS46711.1; uc003ayc.5; uc003ayd.5; uc003aye.4; uc062emb.1; uc062emc.1; NONHSAT086816	RefSeq; ENSEMBL; Havana transcript; Ace View; ccdsGene; UCSC Genes; NONCODE	chr22	coding
TC0100009880.hg.1	-2.05214	0.000286179	8338	HIST2H2AC	histone cluster 2, H2ac	NM_003517; ENST00000331380; BC060324; OTTHUMT00000087128; CCDS937.1; uc001etd.4	RefSeq; ENSEMBL; GenBank; Havana transcript; ccdsGene; UCSC Genes	chr1	coding
TC0400008664.hg.1	-2.05164	0.00792915	10733	PLK4	polo-like kinase 4	NM_001190799; NM_001190801; NM_014264; ENST00000270861; ENST00000503914; ENST00000507249; ENST00000507454; ENST00000508113; ENST00000510192; ENST00000510605; ENST00000511942; ENST00000513090; ENST00000514379; ENST00000515069; BC036023; OTTHUMT00000257095; OTTHUMT00000364135; OTTHUMT00000364136; OTTHUMT00000364137; OTTHUMT00000364138; OTTHUMT00000364139; OTTHUMT00000364140; OTTHUMT00000364159; OTT…	RefSeq; ENSEMBL; GenBank; Havana transcript; ccdsGene; circbase; UCSC Genes; NONCODE; lncRNAWiki	chr4	coding
TC2200007495.hg.1	-2.05064	0.0795672	6721	SREBF2	sterol regulatory element binding transcription factor 2	NM_004599; NR_103834; ENST00000361204; ENST00000424354; ENST00000435061; ENST00000462539; ENST00000463741; ENST00000464119; ENST00000490262; ENST00000491541; ENST00000612482; BC051385; BC056158; OTTHUMT00000321956; OTTHUMT00000321957; OTTHUMT00000321958; OTTHUMT00000321959; OTTHUMT00000321960; OTTHUMT00000321961; OTTHUMT00000321962; OTTHUMT00000321963; CCDS14023.1; hsa_circ_0063611; hsa_circ_0063…	RefSeq; ENSEMBL; GenBank; Havana transcript; ccdsGene; circbase; Ace View; UCSC Genes; lncRNAWiki; NONCODE	chr22	coding
TC0300011152.hg.1	-2.05009	0.0401366	1849	DUSP7	dual specificity phosphatase 7	NM_001947; ENST00000469623; ENST00000495880; BC104880; BC104882; OTTHUMT00000349697; OTTHUMT00000349698; CCDS33766.2; DUSP7.bAug10; hsa_circ_0065975; uc003dct.4; uc062kkc.1	RefSeq; ENSEMBL; GenBank; Havana transcript; ccdsGene; Ace View; circbase; UCSC Genes	chr3	coding
TC1100008397.hg.1	-2.04985	0.00242903	51642	MRPL48	mitochondrial ribosomal protein L48	NM_016055; ENST00000310614; ENST00000314282; ENST00000398483; ENST00000411840; ENST00000497094; ENST00000508278; ENST00000535277; ENST00000537007; ENST00000540162; ENST00000542303; ENST00000543058; ENST00000543374; ENST00000544140; ENST00000544819; BC009764; OTTHUMT00000397733; OTTHUMT00000397734; OTTHUMT00000397735; OTTHUMT00000397736; OTTHUMT00000397737; OTTHUMT00000397738; OTTHUMT00000397739; …	RefSeq; ENSEMBL; GenBank; Havana transcript; ccdsGene; circbase; Ace View; UCSC Genes; lncRNAWiki; NONCODE	chr11	coding
TC0X00006723.hg.1	-2.04937	0.0358849	6792	CDKL5	cyclin-dependent kinase-like 5	NM_001037343; NM_003159; ENST00000379989; ENST00000379996; ENST00000463994; ENST00000623364; ENST00000623535; ENST00000623610; ENST00000624700; ENST00000624953; OTTHUMT00000055945; OTTHUMT00000055946; OTTHUMT00000479615; OTTHUMT00000479616; OTTHUMT00000479617; OTTHUMT00000479618; OTTHUMT00000479665; OTTHUMT00000479666; CCDS14186.1; hsa_circ_0001912; hsa_circ_0089980; hsa_circ_0089981; hsa_circ_00…	RefSeq; ENSEMBL; Havana transcript; ccdsGene; circbase; UCSC Genes	chrX	coding
TC0500007915.hg.1	-2.04846	0.107045	167555	FAM151B	family with sequence similarity 151, member B	NM_205548; ENST00000282226; ENST00000502608; ENST00000507084; ENST00000509292; ENST00000511718; BC131563; OTTHUMT00000254072; OTTHUMT00000369319; OTTHUMT00000369320; OTTHUMT00000369321; OTTHUMT00000369460; CCDS4051.1; hsa_circ_0073166; hsa_circ_0073167; hsa_circ_0073168; hsa_circ_0073169; uc003kgv.3; uc010jal.3; uc063eyg.1; uc063eyh.1; uc063eyi.1; ENST00000493052; NONHSAT102407; OTTHUMT00000349628	RefSeq; ENSEMBL; GenBank; Havana transcript; ccdsGene; circbase; UCSC Genes; lncRNAWiki; NONCODE	chr5	coding
TC0300012236.hg.1	-2.04674	0.0259243	56667	MUC13	mucin 13, cell surface associated	NM_033049; ENST00000462728; ENST00000478191; ENST00000490147; ENST00000497378; ENST00000616727; OTTHUMT00000355714; OTTHUMT00000355715; OTTHUMT00000355716; OTTHUMT00000355717; OTTHUMT00000355718; BC172322; hsa_circ_0067082; MUC13.hAug10; uc032sai.1; uc062ngc.1; uc062ngd.1; uc062nge.1; uc062ngf.1; NONHSAT091575; NONHSAT091576; NONHSAT091577	RefSeq; ENSEMBL; Havana transcript; GenBank; circbase; Ace View; UCSC Genes; NONCODE; lncRNAWiki	chr3	coding
TC1700011704.hg.1	-2.0464	0.0668837	342510	CD300E	CD300e molecule	NM_181449; ENST00000392619; ENST00000412268; BC100888; BC100889; BC100890; OTTHUMT00000145080; OTTHUMT00000145081; CCDS11702.1; CD300E.bAug10; uc002jlb.3; uc060jou.1	RefSeq; ENSEMBL; GenBank; Havana transcript; ccdsGene; Ace View; UCSC Genes	chr17	coding
TC1700012078.hg.1	-2.04621	0.0763167	10189	ALYREF	Aly/REF export factor	NM_005782; ENST00000504015; ENST00000505490; ENST00000511412; ENST00000512673; BC052302; OTTHUMT00000360729; OTTHUMT00000360730; OTTHUMT00000360731; OTTHUMT00000360732; CCDS32768.2; hsa_circ_0046270; hsa_circ_0046271; uc002kbu.3; uc060lpm.1; uc060lpn.1; uc060lpo.1; NONHSAT056583	RefSeq; ENSEMBL; GenBank; Havana transcript; ccdsGene; circbase; UCSC Genes; lncRNAWiki; NONCODE	chr17	coding
TC0800012478.hg.1	-2.04496	0.100508	26233	FBXL6	F-box and leucine-rich repeat protein 6	NM_012162; NM_024555; ENST00000331890; ENST00000455319; ENST00000524492; ENST00000524909; ENST00000526524; ENST00000527000; ENST00000529279; ENST00000530142; ENST00000530687; BC033066; OTTHUMT00000382411; OTTHUMT00000382412; OTTHUMT00000382413; OTTHUMT00000382414; OTTHUMT00000382415; OTTHUMT00000382417; OTTHUMT00000382418; OTTHUMT00000382419; OTTHUMT00000382421; CCDS47942.1; CCDS6422.1; FBXL6.gAu…	RefSeq; ENSEMBL; GenBank; Havana transcript; ccdsGene; Ace View; circbase; UCSC Genes; lncRNAWiki; NONCODE	chr8	coding
TC1300008780.hg.1	-2.04418	0.107343	79024	SMIM2	small integral membrane protein 2	NM_024058; ENST00000400419; ENST00000617002; BC000868; OTTHUMT00000044734; CCDS61320.1; uc001uzh.3; uc058wsp.1	RefSeq; ENSEMBL; GenBank; Havana transcript; ccdsGene; UCSC Genes	chr13	coding
TC0900008379.hg.1	-2.04277	0.0356229	10881	ACTL7A	actin-like 7A	NM_006687; ENST00000333999; BC014610; OTTHUMT00000053570; CCDS6772.1; uc004bdj.3	RefSeq; ENSEMBL; GenBank; Havana transcript; ccdsGene; UCSC Genes	chr9	coding
TC0900007981.hg.1	-2.04133	0.312748	65268	WNK2	WNK lysine deficient protein kinase 2	NM_001282394; NM_006648; ENST00000297954; ENST00000395477; ENST00000411624; ENST00000427277; ENST00000432730; ENST00000448039; ENST00000448251; ENST00000453718; ENST00000460335; ENST00000462595; ENST00000464625; ENST00000467401; ENST00000471076; ENST00000474009; ENST00000478583; ENST00000479696; OTTHUMT00000053140; OTTHUMT00000053141; OTTHUMT00000053142; OTTHUMT00000053143; OTTHUMT00000053144; OT…	RefSeq; ENSEMBL; Havana transcript; UCSC Genes; ccdsGene; circbase; Ace View; lncRNAWiki; NONCODE	chr9	coding
TSUnmapped00000355.hg.1	-2.04099	0.0226081	342900	LEUTX	leucine twenty homeobox	ENST00000629267	ENSEMBL		coding
TC0500007231.hg.1	-2.03868	0.0112279	5734	PTGER4	prostaglandin E receptor 4 (subtype EP4)	NM_000958; ENST00000302472; ENST00000509543; ENST00000512578; ENST00000513635; ENST00000514343; BC101534; BC113523; OTTHUMT00000211578; OTTHUMT00000367372; OTTHUMT00000368325; OTTHUMT00000368326; OTTHUMT00000369270; CCDS3930.1; hsa_circ_0072345; hsa_circ_0072346; PTGER4.cAug10; PTGER4.dAug10; uc003jlz.5; uc063dew.1; uc063dex.1; uc063dey.1; uc063dez.1; NONHSAT101145	RefSeq; ENSEMBL; GenBank; Havana transcript; ccdsGene; circbase; Ace View; UCSC Genes; lncRNAWiki; NONCODE	chr5	coding
TC0100006922.hg.1	-2.03787	0.241285	343068	PRAMEF5	PRAME family member 5	ENST00000622421; OTTHUMT00000468934; uc001auu.1; NM_001013407_2; BC101342_2; BC101344_2; BC130274_2; BC130276_2; CCDS72708.1; PRAMEF5.aAug10	ENSEMBL; Havana transcript; UCSC Genes; RefSeq; GenBank; ccdsGene; Ace View	chr1	coding
TC1100009657.hg.1	-2.0378	0.00440091	10410	IFITM3	interferon induced transmembrane protein 3	NM_021034; NR_049759; ENST00000399808; ENST00000526811; ENST00000531688; ENST00000602735; BC006794; BC008417; BC022439; BC070243; OTTHUMT00000384765; OTTHUMT00000384766; OTTHUMT00000384767; OTTHUMT00000468087; CCDS41585.1; hsa_circ_0020625; uc001lpa.3; uc057xeq.1; uc057xer.1; uc057xes.1	RefSeq; ENSEMBL; GenBank; Havana transcript; ccdsGene; circbase; UCSC Genes	chr11	coding
TC0100008151.hg.1	-2.03758	0.136689		RAD54L	Transcript Identified by AceView, Entrez Gene ID(s) 8438	RAD54L.iAug10-unspliced	Ace View	chr1	ncrna
TC0700012911.hg.1	-2.03538	0.299452	100142659	CTAGE8	CTAGE family, member 8	ENST00000487179; OTTHUMT00000349996; NM_001278507_2; NM_198495_2; CCDS64791.1; uc010lpe.5	ENSEMBL; Havana transcript; RefSeq; ccdsGene; UCSC Genes	chr7	coding
TC0100009199.hg.1	-2.03349	0.0358274	64645	MFSD14A	major facilitator superfamily domain containing 14A	NM_033055; ENST00000370152; ENST00000421661; OTTHUMT00000029657; OTTHUMT00000029658; BC172469; CCDS763.1; hsa_circ_0000096; hsa_circ_0013301; hsa_circ_0013302; hsa_circ_0013303; hsa_circ_0013304; uc001dst.4; uc057iqd.1; chr1_100533532_100534142	RefSeq; ENSEMBL; Havana transcript; GenBank; ccdsGene; circbase; UCSC Genes; Guo	chr1	coding
TC1600007186.hg.1	-2.03069	0.304416	730094	C16orf52	chromosome 16 open reading frame 52	NM_001164579; OTTHUMT00000254468; OTTHUMT00000430038; OTTHUMT00000430039; OTTHUMT00000430040; OTTHUMT00000430041; OTTHUMT00000430042; C16orf52.kAug10; CCDS58431.1; uc002dkd.3; uc032dum.1; uc059rxr.1; uc059rxs.1; uc059rxt.1; uc059rxu.1; uc059rxw.1; ENST00000331057; ENST00000542527; ENST00000562186; ENST00000562695; ENST00000567004; ENST00000568049; ENST00000569656; lnc-C16orf52-1:1; lnc-C16orf52-1…	RefSeq; Havana transcript; Ace View; ccdsGene; UCSC Genes; ENSEMBL; lncRNAWiki; NONCODE	chr16	coding
TC0900010878.hg.1	-2.02999	0.0751842	2176	FANCC	Fanconi anemia complementation group C	NM_000136; NM_001243743; NM_001243744; ENST00000289081; ENST00000375305; ENST00000433829; ENST00000464627; ENST00000464653; ENST00000474949; ENST00000477942; ENST00000480712; ENST00000490972; ENST00000493098; BC015748; OTTHUMT00000053219; OTTHUMT00000053220; OTTHUMT00000053221; OTTHUMT00000053222; OTTHUMT00000053223; OTTHUMT00000053224; OTTHUMT00000053226; OTTHUMT00000053227; OTTHUMT00000053228; …	RefSeq; ENSEMBL; GenBank; Havana transcript; ccdsGene; Ace View; circbase; UCSC Genes; Guo; lncRNAWiki; NONCODE	chr9	coding
TC0600007293.hg.1	-2.02853	0.0681789	8346	HIST1H2BI	histone cluster 1, H2bi	NM_003525; ENST00000377733; BC101653; BC101655; OTTHUMT00000040111; CCDS4603.1; uc003nhk.4	RefSeq; ENSEMBL; GenBank; Havana transcript; ccdsGene; UCSC Genes	chr6	coding
TC1100011286.hg.1	-2.02823	0.0386522	3177	SLC29A2	solute carrier family 29 (equilibrative nucleoside transporter), member 2	NM_001300868; NM_001300869; NM_001532; NR_125343; ENST00000311161; ENST00000357440; ENST00000540386; ENST00000541567; ENST00000544554; ENST00000546034; ENST00000619145; BC011387; BC093634; OTTHUMT00000402092; OTTHUMT00000402093; OTTHUMT00000402094; OTTHUMT00000402095; OTTHUMT00000402096; OTTHUMT00000402097; CCDS73326.1; CCDS8137.1; hsa_circ_0022980; hsa_circ_0022981; hsa_circ_0022982; hsa_circ_00…	RefSeq; ENSEMBL; GenBank; Havana transcript; ccdsGene; circbase; Ace View; UCSC Genes	chr11	coding
TC0900008784.hg.1	-2.0262	0.0910924	4010	LMX1B	LIM homeobox transcription factor 1, beta	NM_001174146; NM_001174147; NM_002316; ENST00000355497; ENST00000373474; ENST00000526117; ENST00000561065; BC069601; BC112120; BC113491; BC143801; OTTHUMT00000054122; OTTHUMT00000054123; OTTHUMT00000415751; uc004bqj.3; uc011maa.2; CCDS55342.1; CCDS55343.1; CCDS6866.2; ENST00000602859.1; uc004bqi.4; uc064vtj.1; HG502432.1:1..736:ncRNA; NONHSAT134780	RefSeq; ENSEMBL; GenBank; Havana transcript; UCSC Genes; ccdsGene; lncRNAWiki; RNACentral; NONCODE	chr9	coding
TC0100018182.hg.1	-2.02448	0.0808735	26099	SZRD1	SUZ RNA binding domain containing 1	NM_001114600; NM_001271869; NR_073500; NR_073501; NR_073502; NR_073503; ENST00000401088; ENST00000401089; ENST00000471507; ENST00000472351; ENST00000472461; ENST00000475554; ENST00000476423; ENST00000486763; ENST00000492354; BC023988; BC065538; OTTHUMT00000006283; OTTHUMT00000100296; OTTHUMT00000100297; OTTHUMT00000355658; OTTHUMT00000355659; OTTHUMT00000355660; OTTHUMT00000355661; OTTHUMT0000035…	RefSeq; ENSEMBL; GenBank; Havana transcript; ccdsGene; circbase; UCSC Genes; lncRNAWiki; NONCODE	chr1	coding
TC1100013021.hg.1	-2.02308	0.00192778	2237	FEN1	flap structure-specific endonuclease 1	NM_004111; ENST00000305885; ENST00000535307; ENST00000535723; BC000323; OTTHUMT00000398526; OTTHUMT00000398528; OTTHUMT00000439312; CCDS8010.1; uc001nsg.4; uc058cei.1; uc058cek.1	RefSeq; ENSEMBL; GenBank; Havana transcript; ccdsGene; UCSC Genes	chr11	coding
TC1200008739.hg.1	-2.02218	0.350412	90488	TMEM263	transmembrane protein 263	NM_152261; ENST00000280756; ENST00000547081; ENST00000547242; ENST00000548125; ENST00000548806; ENST00000550344; ENST00000551237; ENST00000551489; ENST00000551813; BC020522; OTTHUMT00000406856; OTTHUMT00000406857; OTTHUMT00000406858; OTTHUMT00000406859; OTTHUMT00000406860; OTTHUMT00000406861; OTTHUMT00000406862; OTTHUMT00000406863; OTTHUMT00000406864; C12orf23.kAug10; CCDS9110.1; uc001tmb.4; uc00…	RefSeq; ENSEMBL; GenBank; Havana transcript; Ace View; ccdsGene; UCSC Genes; lncRNAWiki; NONCODE	chr12	coding
TC1100007445.hg.1	-2.02206	0.00969845	90993	CREB3L1	cAMP responsive element binding protein 3-like 1	NM_052854; ENST00000527342; ENST00000530518; ENST00000534616; ENST00000534787; ENST00000616094; ENST00000621158; BC014097; BC015781; OTTHUMT00000389702; OTTHUMT00000389703; OTTHUMT00000389704; OTTHUMT00000389724; OTTHUMT00000389725; OTTHUMT00000389726; CCDS53620.1; hsa_circ_0003668; hsa_circ_0007719; hsa_circ_0021828; hsa_circ_0021829; hsa_circ_0021830; hsa_circ_0021831; hsa_circ_0021832; uc021qi…	RefSeq; ENSEMBL; GenBank; Havana transcript; ccdsGene; circbase; UCSC Genes; Guo; lncRNAWiki; NONCODE	chr11	coding
TC0600011184.hg.1	-2.02186	0.00851698	8970	HIST1H2BJ	histone cluster 1, H2bj	NM_021058; ENST00000339812; ENST00000606923; ENST00000607124; OTTHUMT00000040138; OTTHUMT00000471037; OTTHUMT00000471042; CCDS4618.1; hsa_circ_0075898; hsa_circ_0075899; uc003niv.4; uc063miy.1; uc063miz.1	RefSeq; ENSEMBL; Havana transcript; ccdsGene; circbase; UCSC Genes	chr6	coding
TC1500010655.hg.1	-2.02001	0.0386733	22856	CHSY1	chondroitin sulfate synthase 1	NM_014918; ENST00000254190; ENST00000543813; ENST00000559384; ENST00000560766; ENST00000561143; ENST00000561414; BC046247; OTTHUMT00000313624; OTTHUMT00000415769; OTTHUMT00000415770; OTTHUMT00000415771; OTTHUMT00000415772; OTTHUMT00000415773; uc021sxt.1; CCDS10390.1; CHSY1.eAug10; CHSY1.gAug10; hsa_circ_0005019; uc059nxy.1; uc059nxz.1; uc059nya.1; uc059nyb.1; uc059nyc.1; chr15_101775286_101775782…	RefSeq; ENSEMBL; GenBank; Havana transcript; UCSC Genes; ccdsGene; Ace View; circbase; Guo; lncRNAWiki; NONCODE	chr15	coding
TC1000012570.hg.1	-2.01971	0.289354	8509	NDST2	N-deacetylase/N-sulfotransferase (heparan glucosaminyl) 2	NM_003635; ENST00000299641; ENST00000309979; ENST00000398701; ENST00000429742; ENST00000463410; ENST00000465929; BC035711; BC110588; BC110589; OTTHUMT00000048707; OTTHUMT00000048708; OTTHUMT00000048709; OTTHUMT00000048710; OTTHUMT00000048711; CCDS7335.1; hsa_circ_0018866; hsa_circ_0018867; hsa_circ_0018868; hsa_circ_0018869; hsa_circ_0018870; uc001jvk.3; uc057udx.1; uc057udy.1; uc057udz.1; uc057u…	RefSeq; ENSEMBL; GenBank; Havana transcript; ccdsGene; circbase; UCSC Genes; lncRNAWiki; NONCODE	chr10	coding
TC0600007087.hg.1	-2.0197	0.424282	10486	CAP2	CAP, adenylate cyclase-associated protein, 2 (yeast)	NM_006366; ENST00000229922; ENST00000378990; ENST00000465994; ENST00000476263; ENST00000479291; ENST00000489374; ENST00000493172; ENST00000611958; ENST00000616440; BC008481; OTTHUMT00000039952; OTTHUMT00000353848; OTTHUMT00000353849; OTTHUMT00000353850; OTTHUMT00000353851; OTTHUMT00000353852; OTTHUMT00000353853; CAP2.eAug10; CCDS4539.1; hsa_circ_0002245; hsa_circ_0007960; hsa_circ_0075697; hsa_ci…	RefSeq; ENSEMBL; GenBank; Havana transcript; Ace View; ccdsGene; circbase; UCSC Genes; Guo	chr6	coding
TC0900009520.hg.1	-2.01965	0.466603	5789	PTPRD	protein tyrosine phosphatase, receptor type, D	NM_001040712; NM_001171025; NM_002839; NM_130391; NM_130392; NM_130393; ENST00000355233; ENST00000356435; ENST00000381196; ENST00000397606; ENST00000397611; ENST00000397617; ENST00000463477; ENST00000471274; ENST00000477552; ENST00000481079; ENST00000486161; ENST00000488774; ENST00000537002; ENST00000540109; BC106713; BC106714; BC106715; BC106716; OTTHUMT00000055393; OTTHUMT00000055395; OTTHUMT00…	RefSeq; ENSEMBL; GenBank; Havana transcript; UCSC Genes; ccdsGene; circbase; Ace View; lncRNAWiki; NONCODE	chr9	coding
TC0700009230.hg.1	-2.0188	0.0775648	57016	AKR1B10	aldo-keto reductase family 1, member B10 (aldose reductase)	NM_020299; ENST00000359579; ENST00000475559; ENST00000496435; ENST00000498818; BC008837; OTTHUMT00000339615; OTTHUMT00000339616; OTTHUMT00000339617; OTTHUMT00000339725; AKR1B10.dAug10; CCDS5832.1; hsa_circ_0082476; hsa_circ_0082477; uc003vrr.4; uc064ifa.1; uc064ifb.1; uc064ifc.1; NONHSAT123465	RefSeq; ENSEMBL; GenBank; Havana transcript; Ace View; ccdsGene; circbase; UCSC Genes; lncRNAWiki; NONCODE	chr7	coding
TC0900009861.hg.1	-2.01822	0.310859	65083	NOL6	nucleolar protein 6 (RNA-associated)	NM_022917; NM_139235; ENST00000297990; ENST00000353159; ENST00000379470; ENST00000379471; ENST00000464829; ENST00000496319; BC030139; OTTHUMT00000001015; OTTHUMT00000001016; OTTHUMT00000001017; OTTHUMT00000001018; OTTHUMT00000001019; OTTHUMT00000001020; CCDS6543.1; CCDS6544.1; hsa_circ_0086664; hsa_circ_0086665; hsa_circ_0086666; hsa_circ_0086667; hsa_circ_0086668; hsa_circ_0086669; hsa_circ_0086…	RefSeq; ENSEMBL; GenBank; Havana transcript; ccdsGene; circbase; UCSC Genes; lncRNAWiki; NONCODE	chr9	coding
TC0200008627.hg.1	-2.01725	0.00176621	4862	NPAS2	neuronal PAS domain protein 2	NM_002518; ENST00000335681; ENST00000427413; ENST00000433408; ENST00000448812; ENST00000450763; ENST00000451740; ENST00000471974; ENST00000474550; ENST00000486017; ENST00000490052; ENST00000492373; ENST00000495559; BC051351; BC072383; OTTHUMT00000253168; OTTHUMT00000329071; OTTHUMT00000329072; OTTHUMT00000329073; OTTHUMT00000329074; OTTHUMT00000329075; OTTHUMT00000329076; OTTHUMT00000329077; OTTH…	RefSeq; ENSEMBL; GenBank; Havana transcript; ccdsGene; circbase; Ace View; UCSC Genes; Guo; lncRNAWiki; NONCODE	chr2	coding
TC0100015797.hg.1	-2.01639	0.147855		POGZ	Transcript Identified by AceView, Entrez Gene ID(s) 23126	POGZ.vfAug10-unspliced	Ace View	chr1	ncrna
TC1900007787.hg.1	-2.01563	0.0319846	79047	KCTD15	potassium channel tetramerization domain containing 15	NM_001129994; NM_001129995; NM_024076; ENST00000284006; ENST00000430256; ENST00000587559; ENST00000587658; ENST00000588637; ENST00000588881; ENST00000589786; ENST00000590385; ENST00000590771; ENST00000590906; ENST00000592210; ENST00000592363; BC001185; BC009335; OTTHUMT00000451454; OTTHUMT00000451455; OTTHUMT00000451456; OTTHUMT00000451457; OTTHUMT00000451458; OTTHUMT00000451459; OTTHUMT000004514…	RefSeq; ENSEMBL; GenBank; Havana transcript; ccdsGene; circbase; UCSC Genes; lncRNAWiki; NONCODE; lncRNA Db	chr19	coding
TC1200012730.hg.1	-2.0147	0.00351932	5827	PXMP2	peroxisomal membrane protein 2	NM_018663; ENST00000317479; ENST00000428960; ENST00000454379; ENST00000539093; ENST00000543589; BC073997; OTTHUMT00000397553; OTTHUMT00000397554; OTTHUMT00000397555; OTTHUMT00000397556; OTTHUMT00000397557; uc001ukt.3; CCDS9279.1; hsa_circ_0029543; hsa_circ_0029544; PXMP2andPGAM5.fAug10; uc058vle.1; uc058vlg.1; uc058vlh.1; uc058vli.1; NONHSAT032114	RefSeq; ENSEMBL; GenBank; Havana transcript; UCSC Genes; ccdsGene; circbase; Ace View; lncRNAWiki; NONCODE	chr12	coding
TC0200015869.hg.1	-2.01372	0.00912314	130340	AP1S3	adaptor-related protein complex 1 sigma 3 subunit	NM_001039569; NR_110905; NR_110906; ENST00000334271; ENST00000396653; ENST00000396654; ENST00000409375; ENST00000415298; ENST00000443700; ENST00000444408; ENST00000446015; BC009606; BC021898; OTTHUMT00000256867; OTTHUMT00000256868; OTTHUMT00000256869; OTTHUMT00000330920; OTTHUMT00000330921; OTTHUMT00000330922; OTTHUMT00000353158; OTTHUMT00000383293; CCDS42827.1; hsa_circ_0058456; uc002vnn.4; uc01…	RefSeq; ENSEMBL; GenBank; Havana transcript; ccdsGene; circbase; UCSC Genes; Ace View; Guo	chr2	coding
TC1700010856.hg.1	-2.01361	0.00461965	10882	C1QL1	complement component 1, q subcomponent-like 1	NM_006688; ENST00000253407; BC008798; OTTHUMT00000371119; CCDS11492.1; uc002ihv.4	RefSeq; ENSEMBL; GenBank; Havana transcript; ccdsGene; UCSC Genes	chr17	coding
TC1100013037.hg.1	-2.01359	0.0448635	402	ARL2	ADP-ribosylation factor like GTPase 2	NM_001199745; NM_001667; ENST00000246747; ENST00000524585; ENST00000529254; ENST00000529384; ENST00000531533; ENST00000533729; BC002530; OTTHUMT00000385963; OTTHUMT00000385964; OTTHUMT00000385965; OTTHUMT00000385967; OTTHUMT00000385968; OTTHUMT00000385969; ARL2andSNX15.mAug10-unspliced; CCDS55770.1; CCDS8088.1; hsa_circ_0022742; hsa_circ_0022743; hsa_circ_0022744; hsa_circ_0022745; uc001och.5; uc…	RefSeq; ENSEMBL; GenBank; Havana transcript; Ace View; ccdsGene; circbase; UCSC Genes; lncRNAWiki; NONCODE	chr11	coding
TC0300011173.hg.1	-2.01239	0.0144192	64943	NT5DC2	5-nucleotidase domain containing 2	NM_001134231; NM_022908; ENST00000307076; ENST00000422318; ENST00000459839; ENST00000462261; ENST00000463947; ENST00000466112; ENST00000469616; ENST00000471522; ENST00000478091; ENST00000479024; ENST00000486792; ENST00000487779; ENST00000489316; ENST00000490681; ENST00000492555; BC014550; OTTHUMT00000351509; OTTHUMT00000351560; OTTHUMT00000351561; OTTHUMT00000351562; OTTHUMT00000351563; OTTHUMT00…	RefSeq; ENSEMBL; GenBank; Havana transcript; ccdsGene; circbase; Ace View; UCSC Genes; lncRNAWiki; NONCODE	chr3	coding
TC2200006678.hg.1	-2.0119	0.0609532	9342	SNAP29	synaptosome associated protein 29kDa	NM_004782; ENST00000215730; ENST00000439214; ENST00000490458; BC009715; OTTHUMT00000320000; OTTHUMT00000320147; OTTHUMT00000320148; CCDS13784.1; hsa_circ_0062399; uc011ahw.3; uc062bvn.1; uc062bvo.1	RefSeq; ENSEMBL; GenBank; Havana transcript; ccdsGene; circbase; UCSC Genes	chr22	coding
TC1300008249.hg.1	-2.01116	0.36052	2706	GJB2	gap junction protein beta 2	NM_004004; ENST00000382844; ENST00000382848; BC017048; BC071703; CCDS9290.1; uc001umy.4; uc058vty.1; OTTHUMT00000044063; OTTHUMT00000044064	RefSeq; ENSEMBL; GenBank; ccdsGene; UCSC Genes; Havana transcript	chr13	coding
TC1100012037.hg.1	-2.01017	0.00310871	84441	MAML2	mastermind-like transcriptional coactivator 2	NM_032427; ENST00000524717; ENST00000618849; BC143529; BC152449; OTTHUMT00000395540; CCDS44714.1; hsa_circ_0024084; hsa_circ_0024085; hsa_circ_0024086; uc001pfw.3; uc058gsi.1; chr11_95825055_95826681	RefSeq; ENSEMBL; GenBank; Havana transcript; ccdsGene; circbase; UCSC Genes; Guo	chr11	coding
TC1700010504.hg.1	-2.01016	0.204713	6928	HNF1B	HNF1 homeobox B	NM_000458; NM_001165923; NM_001304286; ENST00000613727; ENST00000614313; ENST00000617272; ENST00000617811; ENST00000618894; ENST00000620125; ENST00000621123; BC017714; OTTHUMT00000477393; OTTHUMT00000477394; OTTHUMT00000477395; OTTHUMT00000477396; OTTHUMT00000477397; CCDS11324.1; CCDS58538.1; uc002hok.5; uc010wdi.3; uc021tvv.2; uc021tvw.2; uc060elf.1; uc060elg.1; uc060elh.1	RefSeq; ENSEMBL; GenBank; Havana transcript; ccdsGene; UCSC Genes	chr17	coding
TC0400013001.hg.1	-2.00904	0.0862271	55805	LRP2BP	LRP2 binding protein	NM_018409; ENST00000328559; ENST00000510776; ENST00000511404; BC150161; BC152444; OTTHUMT00000360679; OTTHUMT00000360682; OTTHUMT00000360709; CCDS3840.1; uc003ixj.3; uc021xvi.2; uc063bjv.1; UFSP2andLRP2BP.gAug10; UFSP2andLRP2BP.jAug10	RefSeq; ENSEMBL; GenBank; Havana transcript; ccdsGene; UCSC Genes; Ace View	chr4	coding
TC0100016205.hg.1	-2.00892	0.535131	284680	C1orf111	chromosome 1 open reading frame 111	NM_182581; ENST00000367935; ENST00000493255; ENST00000620601; BC032957; OTTHUMT00000076791; OTTHUMT00000076792; CCDS1238.1; uc001gbx.3; uc057mun.1; uc057muo.1; NONHSAT007218	RefSeq; ENSEMBL; GenBank; Havana transcript; ccdsGene; UCSC Genes; lncRNAWiki; NONCODE	chr1	coding
TC0100015789.hg.1	-2.00879	0.00373732		POGZ	Transcript Identified by AceView, Entrez Gene ID(s) 23126	POGZ.veAug10-unspliced	Ace View	chr1	ncrna
TC2000008946.hg.1	-2.00697	0.0888128	2686	GGT7	gamma-glutamyltransferase 7	NM_178026; ENST00000336431; ENST00000427420; ENST00000469018; ENST00000470952; BC141843; OTTHUMT00000078816; OTTHUMT00000078817; OTTHUMT00000078818; OTTHUMT00000078820; CCDS13242.2; GGT7.lAug10; hsa_circ_0060001; hsa_circ_0060002; hsa_circ_0060003; hsa_circ_0060004; hsa_circ_0060005; hsa_circ_0060006; hsa_circ_0060007; uc002xay.4; uc061wjp.1; uc061wjq.1; uc061wjr.1; chr20_33442333_33442726	RefSeq; ENSEMBL; GenBank; Havana transcript; ccdsGene; Ace View; circbase; UCSC Genes; Guo	chr20	coding
TC1000007925.hg.1	-2.00674	0.0134571	1979	EIF4EBP2	eukaryotic translation initiation factor 4E binding protein 2	NM_004096; ENST00000373218; BC005057; BC050633; OTTHUMT00000048513; CCDS7303.1; hsa_circ_0018655; hsa_circ_0018656; hsa_circ_0018657; uc001jrb.4	RefSeq; ENSEMBL; GenBank; Havana transcript; ccdsGene; circbase; UCSC Genes	chr10	coding
TC1700011719.hg.1	-2.00336	0.158146	2905	GRIN2C	glutamate receptor, ionotropic, N-methyl D-aspartate 2C	NM_000835; NM_001278553; NR_103735; ENST00000293190; ENST00000347612; ENST00000578159; ENST00000584176; ENST00000584496; BC140801; OTTHUMT00000103824; OTTHUMT00000444444; OTTHUMT00000444445; OTTHUMT00000444446; OTTHUMT00000444447; CCDS32724.1; CCDS62330.1; GRIN2C.bAug10; GRIN2C.fAug10; uc002jlt.3; uc002jlu.2; uc060jqw.1; uc060jqx.1; uc060jqy.1; NONHSAT055825	RefSeq; ENSEMBL; GenBank; Havana transcript; ccdsGene; Ace View; UCSC Genes; lncRNAWiki; NONCODE	chr17	coding
TSUnmapped00000188.hg.1	-2.00304	0.233435	6195	RPS6KA1	ribosomal protein S6 kinase, 90kDa, polypeptide 1	ENST00000627022	ENSEMBL		coding
TC1900009165.hg.1	-2.00289	0.004353	339366	ADAMTSL5	ADAMTS like 5	NM_213604; ENST00000330475; ENST00000395467; ENST00000585700; ENST00000585804; ENST00000586272; ENST00000589839; ENST00000590090; ENST00000590440; ENST00000590562; ENST00000590682; ENST00000591077; BC139833; OTTHUMT00000449713; OTTHUMT00000449715; OTTHUMT00000449716; OTTHUMT00000449718; OTTHUMT00000449719; OTTHUMT00000449721; OTTHUMT00000449722; OTTHUMT00000449723; OTTHUMT00000473833; OTTHUMT0000…	RefSeq; ENSEMBL; GenBank; Havana transcript; UCSC Genes; Ace View; ccdsGene; circbase; Guo; NONCODE; lncRNAWiki	chr19	coding
TC0200012643.hg.1	-2.00233	0.0154557	55704	CCDC88A	coiled-coil domain containing 88A	NM_001135597; NM_001254943; NM_018084; ENST00000263630; ENST00000336838; ENST00000412148; ENST00000413716; ENST00000426576; ENST00000430086; ENST00000436346; ENST00000444458; ENST00000456975; ENST00000468534; ENST00000471947; ENST00000474059; ENST00000476903; ENST00000621814; BC132736; BC144320; OTTHUMT00000324406; OTTHUMT00000325312; OTTHUMT00000325313; OTTHUMT00000325314; OTTHUMT00000325315; OT…	RefSeq; ENSEMBL; GenBank; Havana transcript; Ace View; ccdsGene; circbase; UCSC Genes; lncRNAWiki; NONCODE	chr2	coding
TC0300011834.hg.1	-2.00109	0.0727572	11259	FILIP1L	filamin A interacting protein 1-like	NM_001042459; NM_001282793; NM_001282794; NM_014890; NM_182909; ENST00000331335; ENST00000354552; ENST00000383694; ENST00000398326; ENST00000468533; ENST00000471562; ENST00000476723; ENST00000477258; ENST00000487087; ENST00000495625; BC027860; OTTHUMT00000353069; OTTHUMT00000353070; OTTHUMT00000353071; OTTHUMT00000353072; OTTHUMT00000353074; OTTHUMT00000353075; OTTHUMT00000353076; OTTHUMT00000353…	RefSeq; ENSEMBL; GenBank; Havana transcript; ccdsGene; UCSC Genes; lncRNAWiki; NONCODE	chr3	coding
TC1300009799.hg.1	-2.00059	0.0567989	79587	CARS2	cysteinyl-tRNA synthetase 2, mitochondrial (putative)	NM_024537; ENST00000257347; ENST00000375781; ENST00000465145; ENST00000471986; ENST00000480437; ENST00000481787; ENST00000485188; ENST00000487253; ENST00000535398; ENST00000535516; ENST00000535615; ENST00000537386; ENST00000537394; ENST00000537404; ENST00000537412; ENST00000537743; ENST00000537802; ENST00000539269; ENST00000539405; ENST00000540006; ENST00000540215; ENST00000540629; ENST0000054078…	RefSeq; ENSEMBL; GenBank; Havana transcript; UCSC Genes; Ace View; ccdsGene; circbase; lncRNAWiki; NONCODE	chr13	coding
TC0300007015.hg.1	-1.99671	0.168066		ARPP21	Transcript Identified by AceView, Entrez Gene ID(s) 10777	ARPP21.viAug10-unspliced	Ace View	chr3	ncrna
TC1100008330.hg.1	-1.99486	0.270915	10068	IL18BP	interleukin 18 binding protein	NM_001039659; NM_001039660; NM_001145055; NM_001145057; NM_005699; NM_173042; NM_173044; ENST00000260049; ENST00000337131; ENST00000343898; ENST00000393703; ENST00000393705; ENST00000393707; ENST00000404792; ENST00000414358; ENST00000497194; ENST00000525932; ENST00000531053; ENST00000531777; ENST00000534583; ENST00000620017; BC044215; OTTHUMT00000258012; OTTHUMT00000277121; OTTHUMT00000277122; OT…	RefSeq; ENSEMBL; GenBank; Havana transcript; UCSC Genes; ccdsGene; Ace View; lncRNAWiki; NONCODE	chr11	coding
TC1300010005.hg.1	-1.99445	0.0924554	23263	MCF2L	MCF.2 cell line derived transforming sequence like	ENST00000397036; ENST00000442625; OTTHUMT00000045863; OTTHUMT00000045864; uc001vso.4; uc058ykd.1	ENSEMBL; Havana transcript; UCSC Genes	chr13	coding
TC0900009145.hg.1	-1.9941	0.182111	10439	OLFM1	olfactomedin 1	NM_001282611; NM_001282612; NM_006334; NM_014279; ENST00000252854; ENST00000277415; ENST00000339720; ENST00000371793; ENST00000371796; ENST00000371799; ENST00000371801; ENST00000392991; ENST00000483042; ENST00000539529; ENST00000539877; ENST00000545657; ENST00000615948; BC008763; BC011741; OTTHUMT00000054971; OTTHUMT00000054972; OTTHUMT00000054973; OTTHUMT00000054974; OTTHUMT00000054975; OTTHUMT0…	RefSeq; ENSEMBL; GenBank; Havana transcript; ccdsGene; circbase; Ace View; UCSC Genes	chr9	coding
TC0300013520.hg.1	-1.99346	0.00356823	9076	CLDN1	claudin 1	NM_021101; ENST00000295522; ENST00000490800; BC012471; OTTHUMT00000343516; OTTHUMT00000343561; CCDS3295.1; CLDN1.cAug10; uc003fsh.4; uc062rjt.1; NONHSAT093946	RefSeq; ENSEMBL; GenBank; Havana transcript; ccdsGene; Ace View; UCSC Genes; lncRNAWiki; NONCODE	chr3	coding
TC0100018264.hg.1	-1.98859	0.046767	2946	GSTM2	glutathione S-transferase mu 2 (muscle)	ENST00000624726; OTTHUMT00000446293; uc057jbr.1; NONHSAT005062	ENSEMBL; Havana transcript; UCSC Genes; lncRNAWiki; NONCODE	chr1	coding
TC1500009738.hg.1	-1.98675	0.0459637	9768; 53944	KIAA0101; CSNK1G1	KIAA0101; casein kinase 1, gamma 1	NM_001029989; NM_014736; NM_022048; NR_109934; ENST00000300035; ENST00000303052; ENST00000380258; ENST00000558008; ENST00000558043; ENST00000558250; ENST00000559280; ENST00000559519; ENST00000560234; ENST00000606225; ENST00000607537; ENST00000625619; BC005832; BC007101; BC016782; BC130613; BC136504; OTTHUMT00000256603; OTTHUMT00000256605; OTTHUMT00000418697; OTTHUMT00000418698; OTTHUMT00000418699…	RefSeq; ENSEMBL; GenBank; Havana transcript; ccdsGene; circbase; Ace View; UCSC Genes; Guo; lncRNAWiki; NONCODE	chr15	coding
TC0X00007523.hg.1	-1.98484	0.05561	1896	EDA	ectodysplasin A	NM_001005609; NM_001005610; NM_001005612; NM_001005613; NM_001399; ENST00000338901; ENST00000374548; ENST00000374552; ENST00000374553; ENST00000502251; ENST00000503592; ENST00000510681; ENST00000524573; ENST00000525810; ENST00000527388; ENST00000530321; ENST00000533317; ENST00000616899; BC126143; BC144049; BC144051; OTTHUMT00000057047; OTTHUMT00000057048; OTTHUMT00000057049; OTTHUMT00000358694; O…	RefSeq; ENSEMBL; GenBank; Havana transcript; ccdsGene; Ace View; UCSC Genes; lncRNAWiki; NONCODE	chrX	coding
TC0500008054.hg.1	-1.98295	0.00491123	10622	POLR3G	polymerase (RNA) III (DNA directed) polypeptide G (32kD)	NM_006467; ENST00000399107; ENST00000503373; ENST00000503973; ENST00000504930; ENST00000505345; ENST00000512239; ENST00000514483; ENST00000622335; OTTHUMT00000370462; OTTHUMT00000370464; OTTHUMT00000370465; OTTHUMT00000370466; OTTHUMT00000370467; OTTHUMT00000370468; uc003kjq.3; BC141649; CCDS43337.1; hsa_circ_0073274; hsa_circ_0073275; hsa_circ_0073276; uc011cuc.3; uc063fhx.1; uc063fhy.1; uc063fh…	RefSeq; ENSEMBL; Havana transcript; UCSC Genes; GenBank; ccdsGene; circbase; Guo	chr5	coding
TC0600011142.hg.1	-1.98035	0.0154473	8355	HIST1H3G	histone cluster 1, H3g	NM_003534; ENST00000614378; OTTHUMT00000040099; CCDS4602.1; uc003nhi.4	RefSeq; ENSEMBL; Havana transcript; ccdsGene; UCSC Genes	chr6	coding
TC0100015832.hg.1	-1.97975	0.168406	49860	CRNN	cornulin	NM_016190; ENST00000271835; BC030807; OTTHUMT00000034503; CCDS1010.1; uc001ezx.3	RefSeq; ENSEMBL; GenBank; Havana transcript; ccdsGene; UCSC Genes	chr1	coding
TC1700012093.hg.1	-1.97867	0.0475073	2194	FASN	fatty acid synthase	NM_004104; ENST00000306749; ENST00000578424; ENST00000579410; ENST00000579758; ENST00000580382; ENST00000584610; BC063242; OTTHUMT00000442369; OTTHUMT00000442371; OTTHUMT00000442372; OTTHUMT00000442373; OTTHUMT00000442374; OTTHUMT00000442375; CCDS11801.1; FASN.fAug10; hsa_circ_0046327; hsa_circ_0046328; hsa_circ_0046329; hsa_circ_0046330; hsa_circ_0046331; hsa_circ_0046332; hsa_circ_0046333; hsa_…	RefSeq; ENSEMBL; GenBank; Havana transcript; ccdsGene; Ace View; circbase; UCSC Genes	chr17	coding
TC0500012864.hg.1	-1.97754	0.0940637	1482	NKX2-5	NK2 homeobox 5	NM_001166175; NM_001166176; NM_004387; ENST00000329198; ENST00000424406; ENST00000517440; ENST00000521848; BC025711; CCDS4387.1; CCDS54949.1; CCDS54950.1; NKX2-5.cAug10; NKX2-5.dAug10; uc003mcm.3; uc010jjt.3; uc011dfe.3; uc063jta.1; OTTHUMT00000252942; OTTHUMT00000317803; OTTHUMT00000317804; OTTHUMT00000317805	RefSeq; ENSEMBL; GenBank; ccdsGene; Ace View; UCSC Genes; Havana transcript	chr5	coding
TC1700006740.hg.1	-1.977	0.0976465	9744	ACAP1	ArfGAP with coiled-coil, ankyrin repeat and PH domains 1	NM_014716; ENST00000158762; ENST00000570439; ENST00000570457; ENST00000570504; ENST00000571220; ENST00000571471; ENST00000573893; ENST00000574499; ENST00000575415; ENST00000575425; ENST00000576594; ENST00000576628; BC018543; OTTHUMT00000220049; OTTHUMT00000440564; OTTHUMT00000440574; OTTHUMT00000440575; OTTHUMT00000440576; OTTHUMT00000440578; OTTHUMT00000440579; OTTHUMT00000440580; OTTHUMT0000044…	RefSeq; ENSEMBL; GenBank; Havana transcript; Ace View; ccdsGene; circbase; UCSC Genes; lncRNAWiki; NONCODE	chr17	coding
TC0100010761.hg.1	-1.97626	0.0196623	9917	FAM20B	family with sequence similarity 20, member B	NM_014864; ENST00000263733; ENST00000440702; BC046441; BC051794; OTTHUMT00000084922; OTTHUMT00000098157; CCDS1328.1; FAM20B.cAug10; hsa_circ_0005977; hsa_circ_0008653; hsa_circ_0015413; hsa_circ_0015414; hsa_circ_0015415; hsa_circ_0015416; hsa_circ_0015417; hsa_circ_0015418; uc001gmc.4; uc057npb.1	RefSeq; ENSEMBL; GenBank; Havana transcript; ccdsGene; Ace View; circbase; UCSC Genes	chr1	coding
TC0900012193.hg.1	-1.97565	0.00595032	158056	MAMDC4	MAM domain containing 4	NM_206920; ENST00000317446; ENST00000445819; ENST00000479475; ENST00000481327; OTTHUMT00000055158; OTTHUMT00000055159; OTTHUMT00000254642; BC172486; CCDS7010.1; hsa_circ_0089584; hsa_circ_0089585; hsa_circ_0089586; hsa_circ_0089587; hsa_circ_0089588; hsa_circ_0089589; PHPT1andMAMDC4.kAug10; uc004cjs.4; uc064xfc.1; uc064xfd.1; uc064xfe.1; NONHSAT135610	RefSeq; ENSEMBL; Havana transcript; GenBank; ccdsGene; circbase; Ace View; UCSC Genes; lncRNAWiki; NONCODE	chr9	coding
TC0700006662.hg.1	-1.9747	0.0210443	56913	C1GALT1	core 1 synthase, glycoprotein-N-acetylgalactosamine 3-beta-galactosyltransferase 1	NM_020156; ENST00000223122; ENST00000402468; ENST00000419721; ENST00000429911; ENST00000436587; ENST00000467716; ENST00000476068; OTTHUMT00000324379; OTTHUMT00000324380; OTTHUMT00000324381; OTTHUMT00000324382; OTTHUMT00000324383; OTTHUMT00000326718; C1GALT1.dAug10; C1GALT1.fAug10; CCDS5355.1; hsa_circ_0001675; uc003sra.5; uc003srb.4; uc010kto.3; uc064bkc.1; uc064bkd.1; uc064bke.1; uc064bkf.1; NON…	RefSeq; ENSEMBL; Havana transcript; Ace View; ccdsGene; circbase; UCSC Genes; lncRNAWiki; NONCODE	chr7	coding
TC0500011752.hg.1	-1.97453	0.0231848		FEM1C	Jeck2013 ALT_ACCEPTOR, ALT_DONOR, coding, INTERNAL, intronic best transcript NM_020177	hsa_circ_0005381; chr5_114876581_114878598	circbase; Guo	chr5	ncrna
TC0900007105.hg.1	-1.97106	0.375939	646962	HRCT1	histidine rich carboxyl terminus 1	NM_001039792; ENST00000354323; OTTHUMT00000334099; uc003zyr.1; CCDS35012.1	RefSeq; ENSEMBL; Havana transcript; UCSC Genes; ccdsGene	chr9	coding
TC0100007471.hg.1	-1.96764	0.358653		RPS6KA1	Zhang2013 ALT_ACCEPTOR, ALT_DONOR, coding, INTERNAL, intronic best transcript NM_002953	hsa_circ_0092329	circbase	chr1	ncrna
TC0100012460.hg.1	-1.96502	0.0729593		UBE2J2	Transcript Identified by AceView, Entrez Gene ID(s) 118424	UBE2J2.vdAug10-unspliced	Ace View	chr1	ncrna
TC1000009408.hg.1	-1.96091	0.290999	170393	C10orf91	chromosome 10 open reading frame 91	NM_173541; BC030794; OTTHUMT00000051078; OTTHUMT00000051079; uc001llm.4; uc057wxl.1; uc057wxm.1; ENST00000321248; ENST00000392630; ENST00000490765; LN608362.1:1..462:ncRNA; LN608363.1:1..1846:ncRNA; NONHSAT017075	RefSeq; GenBank; Havana transcript; UCSC Genes; ENSEMBL; RNACentral; lncRNAWiki; NONCODE	chr10	coding
TC0300006483.hg.1	-1.96056	0.000892144	8553	BHLHE40	basic helix-loop-helix family, member e40	NM_003670; ENST00000256495; ENST00000460806; ENST00000467610; BC082238; OTTHUMT00000239244; OTTHUMT00000338956; OTTHUMT00000338957; CCDS2565.1; hsa_circ_0064076; hsa_circ_0064077; uc003bqf.4; uc062gen.1; uc062geo.1; NONHSAT087648	RefSeq; ENSEMBL; GenBank; Havana transcript; ccdsGene; circbase; UCSC Genes; lncRNAWiki; NONCODE	chr3	coding
TC0100018539.hg.1	-1.96026	0.194261	100527964; 84320	LHX4-AS1; ACBD6	LHX4 antisense RNA 1; acyl-CoA binding domain containing 6	NR_037642; OTTHUMT00000084992; OTTHUMT00000084993; OTTHUMT00000475679; ENST00000415414.1; ENST00000440959.2; uc001gof.3; uc057nrq.1; uc057nrr.1; ENST00000415414; ENST00000440959; ENST00000622400; NONHSAT008253; NONHSAT008254; NONHSAT008255; NR_037642.1:1..2673:ncRNA	RefSeq; Havana transcript; lncRNAWiki; UCSC Genes; ENSEMBL; NONCODE; RNACentral	chr1	coding
TC0300007472.hg.1	-1.95952	0.0380843	132158	GLYCTK	glycerate kinase	NM_001144951; NM_145262; NR_026699; NR_026700; NR_026701; NR_026702; ENST00000305690; ENST00000436784; ENST00000461183; ENST00000471180; ENST00000473032; ENST00000473583; ENST00000477382; ENST00000486393; ENST00000489173; BC021896; BC042151; OTTHUMT00000350831; OTTHUMT00000350832; OTTHUMT00000350833; OTTHUMT00000350834; OTTHUMT00000350835; OTTHUMT00000350837; OTTHUMT00000350838; OTTHUMT0000035083…	RefSeq; ENSEMBL; GenBank; Havana transcript; ccdsGene; Ace View; UCSC Genes	chr3	coding
TC2000007438.hg.1	-1.95951	0.00030117	4605	MYBL2	v-myb avian myeloblastosis viral oncogene homolog-like 2	NM_001278610; NM_002466; ENST00000217026; ENST00000396863; BC007585; BC053555; OTTHUMT00000080408; CCDS13322.1; CCDS63276.1; hsa_circ_0006332; hsa_circ_0060447; hsa_circ_0060448; hsa_circ_0060449; hsa_circ_0060450; hsa_circ_0060451; hsa_circ_0060452; hsa_circ_0060453; hsa_circ_0060454; hsa_circ_0060455; hsa_circ_0060456; hsa_circ_0060457; hsa_circ_0060458; hsa_circ_0060459; hsa_circ_0060460; hsa_…	RefSeq; ENSEMBL; GenBank; Havana transcript; ccdsGene; circbase; UCSC Genes; Guo	chr20	coding
TC1600007449.hg.1	-1.95746	0.0104163	548593; 79008; 100526830; 100526831; 6818	SLX1A; SLX1B; SLX1A-SULT1A3; SLX1B-SULT1A4; SULT1A3	SLX1 homolog A, structure-specific endonuclease subunit; SLX1 homolog B, structure-specific endonuclease subunit; SLX1A-SULT1A3 readthrough (NMD candidate); SLX1B-SULT1A4 readthrough (NMD candidate); sulfotransferase family 1A member 3	NM_001015000; NM_024044; NR_037608; NR_037609; ENST00000251303; ENST00000345535; ENST00000563616; ENST00000563995; ENST00000564268; ENST00000565081; OTTHUMT00000109416; OTTHUMT00000109417; OTTHUMT00000109418; OTTHUMT00000434081; OTTHUMT00000434082; OTTHUMT00000434083; OTTHUMT00000434084; OTTHUMT00000434085; OTTHUMT00000434093; OTTHUMT00000434094; OTTHUMT00000434095; OTTHUMT00000434096; OTTHUMT000…	RefSeq; ENSEMBL; Havana transcript; GenBank; ccdsGene; lncRNAWiki; Ace View; circbase; UCSC Genes; NONCODE; RNACentral	chr16	coding
TC0100008082.hg.1	-1.9564	0.123321	8704	B4GALT2	UDP-Gal:betaGlcNAc beta 1,4- galactosyltransferase, polypeptide 2	NM_001005417; NM_003780; NM_030587; ENST00000309519; ENST00000356836; ENST00000372324; ENST00000434555; ENST00000481924; ENST00000485678; ENST00000497866; ENST00000498543; BC096821; OTTHUMT00000022840; OTTHUMT00000022841; OTTHUMT00000022842; OTTHUMT00000022843; OTTHUMT00000022844; OTTHUMT00000022845; CCDS506.1; CCDS55596.1; hsa_circ_0012128; hsa_circ_0012129; uc001clg.4; uc001clh.4; uc001cli.4; u…	RefSeq; ENSEMBL; GenBank; Havana transcript; ccdsGene; circbase; UCSC Genes; lncRNAWiki; NONCODE	chr1	coding
TC0X00011395.hg.1	-1.95544	0.20895	83844	USP26	ubiquitin specific peptidase 26	NM_031907; ENST00000370832; BC069073; BC101189; BC101190; BC101191; OTTHUMT00000058330; CCDS14635.1; uc011mvf.3	RefSeq; ENSEMBL; GenBank; Havana transcript; ccdsGene; UCSC Genes	chrX	coding
TC2200008346.hg.1	-1.95502	0.387189	4330	MN1	meningioma (disrupted in balanced translocation) 1	NM_002430; ENST00000302326; ENST00000424656; ENST00000497225; OTTHUMT00000320737; OTTHUMT00000320738; OTTHUMT00000320739; uc003adj.3; BC156879; CCDS42998.1; uc010gvg.6; uc062csm.1; NONHSAT084599	RefSeq; ENSEMBL; Havana transcript; UCSC Genes; GenBank; ccdsGene; lncRNAWiki; NONCODE	chr22	coding
TC0400010125.hg.1	-1.95491	0.0490778	9982	FGFBP1	fibroblast growth factor binding protein 1	NM_005130; ENST00000382333; BC003628; BC008910; OTTHUMT00000214974; CCDS3418.1; hsa_circ_0069234; hsa_circ_0069235; uc003gom.4	RefSeq; ENSEMBL; GenBank; Havana transcript; ccdsGene; circbase; UCSC Genes	chr4	coding
TC0100008150.hg.1	-1.95479	0.100415	8438	RAD54L	RAD54-like (S. cerevisiae)	NM_001142548; NM_003579; ENST00000371975; ENST00000442598; ENST00000459678; ENST00000463715; ENST00000469835; ENST00000472889; ENST00000473251; ENST00000476687; ENST00000487700; ENST00000488942; ENST00000493032; ENST00000493985; BC121059; BC121060; OTTHUMT00000021272; OTTHUMT00000021273; OTTHUMT00000021274; OTTHUMT00000021275; OTTHUMT00000021276; OTTHUMT00000021277; OTTHUMT00000021278; OTTHUMT000…	RefSeq; ENSEMBL; GenBank; Havana transcript; UCSC Genes; ccdsGene; circbase; lncRNAWiki; NONCODE	chr1	coding
TC0100014313.hg.1	-1.95413	0.0681885		PPAP2B	Transcript Identified by AceView, Entrez Gene ID(s) 8613	PPAP2B.eAug10-unspliced	Ace View	chr1	ncrna
TC0600007266.hg.1	-1.95221	0.29602		HIST1H1C	Memczak2013 ANTISENSE, CDS, coding, INTERNAL best transcript NM_005319	hsa_circ_0001584	circbase	chr6	ncrna
TC1200010133.hg.1	-1.95173	0.353321		SOX5	Transcript Identified by AceView, Entrez Gene ID(s) 6660	SOX5.sAug10-unspliced	Ace View	chr12	ncrna
TC0700013290.hg.1	-1.94925	0.0254529	54892	NCAPG2	non-SMC condensin II complex subunit G2	NM_001281932; NM_001281933; NM_017760; NR_104054; ENST00000356309; ENST00000409339; ENST00000409423; ENST00000432615; ENST00000441982; ENST00000467785; ENST00000472591; ENST00000474940; ENST00000475918; ENST00000491792; ENST00000621338; BC020560; BC043404; OTTHUMT00000327109; OTTHUMT00000327110; OTTHUMT00000327111; OTTHUMT00000327112; OTTHUMT00000327113; OTTHUMT00000327114; OTTHUMT00000327115; OT…	RefSeq; ENSEMBL; GenBank; Havana transcript; ccdsGene; circbase; Ace View; UCSC Genes	chr7	coding
TC0300011088.hg.1	-1.94905	0.226637	4486	MST1R	macrophage stimulating 1 receptor	NM_001244937; NM_002447; ENST00000296474; ENST00000344206; ENST00000411578; ENST00000434765; ENST00000440292; ENST00000463789; ENST00000467110; ENST00000468525; ENST00000485044; ENST00000490053; ENST00000493535; ENST00000497001; ENST00000612032; ENST00000613534; ENST00000621387; OTTHUMT00000345403; OTTHUMT00000345404; OTTHUMT00000345405; OTTHUMT00000345406; OTTHUMT00000345407; OTTHUMT00000345408;…	RefSeq; ENSEMBL; Havana transcript; ccdsGene; circbase; Ace View; UCSC Genes; lncRNAWiki; NONCODE	chr3	coding
TC0600009127.hg.1	-1.94846	0.0165862	262	AMD1	adenosylmethionine decarboxylase 1	NM_001287214; NM_001287215; NM_001287216; NM_001634; NR_109768; ENST00000368876; ENST00000368877; ENST00000368882; ENST00000368885; ENST00000451850; ENST00000465404; ENST00000610605; ENST00000612642; ENST00000619590; BC000171; OTTHUMT00000041816; OTTHUMT00000041817; OTTHUMT00000041818; OTTHUMT00000041819; OTTHUMT00000476405; OTTHUMT00000476406; OTTHUMT00000476407; CCDS5086.1; CCDS75504.1; CCDS755…	RefSeq; ENSEMBL; GenBank; Havana transcript; ccdsGene; circbase; UCSC Genes; Guo	chr6	coding
TC0600011739.hg.1	-1.94734	0.34811	83795	KCNK16	potassium channel, two pore domain subfamily K, member 16	NM_001135105; NM_001135106; NM_001135107; NM_032115; ENST00000373227; ENST00000373229; ENST00000425054; ENST00000437525; ENST00000507712; BC111860; OTTHUMT00000040452; OTTHUMT00000372087; OTTHUMT00000372088; OTTHUMT00000372089; OTTHUMT00000372090; uc003ooq.3; CCDS47420.1; CCDS47421.1; CCDS47422.1; CCDS4843.1; KCNK16.cAug10; KCNK16.eAug10; uc003oor.5; uc010jwy.4; uc011dtz.2; uc063ohx.1	RefSeq; ENSEMBL; GenBank; Havana transcript; UCSC Genes; ccdsGene; Ace View	chr6	coding
TC1600011372.hg.1	-1.94684	0.039474	445329; 6818	SULT1A4; SULT1A3	sulfotransferase family 1A member 4; sulfotransferase family 1A member 3	NM_001017390; NM_177552; OTTHUMT00000409298; OTTHUMT00000433586; OTTHUMT00000433587; OTTHUMT00000433588; OTTHUMT00000433589; BC156739; CCDS32427.1; GIYD2andSULT1A4.bAug10; uc002dtb.4; uc010byw.4; uc059ssz.1; uc059sta.1; uc059stb.1; ENST00000360423; ENST00000562941; ENST00000563944; ENST00000565290; ENST00000569544; BC078144; BC132914; BC132920; BC144354; BC144355; BC171772; hsa_circ_0038904; NONH…	RefSeq; Havana transcript; GenBank; ccdsGene; Ace View; UCSC Genes; ENSEMBL; circbase; lncRNAWiki; NONCODE	chr16	coding
TC0100008017.hg.1	-1.94518	0.0023976	284716	RIMKLA	ribosomal modification protein rimK-like family member A	NM_173642; ENST00000410070; ENST00000431473; BC039737; OTTHUMT00000019174; OTTHUMT00000019175; CCDS466.2; hsa_circ_0011963; RIMKLA.aAug10; uc001chi.3; uc057fis.1	RefSeq; ENSEMBL; GenBank; Havana transcript; ccdsGene; circbase; Ace View; UCSC Genes	chr1	coding
TC1100009859.hg.1	-1.94501	0.0403597		NUP98	Transcript Identified by AceView, Entrez Gene ID(s) 4928	NUP98.vbAug10-unspliced	Ace View	chr11	ncrna
TC0100013410.hg.1	-1.94417	0.0880349	8431	NR0B2	nuclear receptor subfamily 0, group B, member 2	NM_021969; ENST00000254227; BC030207; OTTHUMT00000012185; CCDS291.1; uc001bnf.4	RefSeq; ENSEMBL; GenBank; Havana transcript; ccdsGene; UCSC Genes	chr1	coding
TC1400007207.hg.1	-1.94112	0.347458	23034	SAMD4A	sterile alpha motif domain containing 4A	NM_001161576; NM_001161577; NM_015589; ENST00000251091; ENST00000392067; ENST00000553988; ENST00000554335; ENST00000554587; ENST00000555091; ENST00000555112; ENST00000555192; ENST00000555719; ENST00000556069; ENST00000557013; ENST00000557692; ENST00000631086; BC121173; BC121174; OTTHUMT00000411186; OTTHUMT00000411187; OTTHUMT00000411188; OTTHUMT00000411189; OTTHUMT00000411190; OTTHUMT00000411191;…	RefSeq; ENSEMBL; GenBank; Havana transcript; ccdsGene; circbase; Ace View; UCSC Genes; Guo; lncRNAWiki; NONCODE	chr14	coding
TC1100012225.hg.1	-1.94111	0.499452	4863	NPAT	nuclear protein, ataxia-telangiectasia locus	NM_002519; ENST00000278612; ENST00000527296; ENST00000530859; ENST00000530926; ENST00000531384; ENST00000610253; BC136270; OTTHUMT00000389506; OTTHUMT00000389776; OTTHUMT00000389777; OTTHUMT00000389778; OTTHUMT00000389779; OTTHUMT00000389780; CCDS41710.1; hsa_circ_0006208; hsa_circ_0024183; hsa_circ_0024184; hsa_circ_0024185; hsa_circ_0024186; hsa_circ_0024187; hsa_circ_0024188; hsa_circ_0024189;…	RefSeq; ENSEMBL; GenBank; Havana transcript; ccdsGene; circbase; Ace View; UCSC Genes; Guo; lncRNAWiki; NONCODE	chr11	coding
TC1700011820.hg.1	-1.93874	0.0120965	6427; 693221	SRSF2; MIR636	serine/arginine-rich splicing factor 2; microRNA 636	NM_001195427; NM_003016; NR_030366; NR_036608; ENST00000358156; ENST00000359995; ENST00000384825; ENST00000392485; ENST00000452355; ENST00000508921; ENST00000582449; ENST00000583836; ENST00000585202; ENST00000586778; ENST00000589919; ENST00000592676; BC000339; BC001303; BC066958; BC070086; OTTHUMT00000437489; OTTHUMT00000437490; OTTHUMT00000437491; OTTHUMT00000437492; OTTHUMT00000439590; OTTHUMT0…	RefSeq; ENSEMBL; GenBank; Havana transcript; UCSC Genes; ccdsGene; circbase; RNACentral; lncRNAWiki; NONCODE	chr17	coding
TC0100010006.hg.1	-1.93614	0.0826185	448834	KPRP	keratinocyte proline-rich protein	NM_001025231; ENST00000606109; OTTHUMT00000034522; CCDS30862.1; KPRP.aAug10; uc057lai.1	RefSeq; ENSEMBL; Havana transcript; ccdsGene; Ace View; UCSC Genes	chr1	coding
TC1700008144.hg.1	-1.93598	0.345786	6668	SP2	Sp2 transcription factor	NM_003110; ENST00000376741; ENST00000613139; BC016680; BC033814; OTTHUMT00000316777; uc002imk.3; CCDS11521.2; hsa_circ_0044328; hsa_circ_0044329; hsa_circ_0044330; uc060grc.1; chr17_45992677_45994496	RefSeq; ENSEMBL; GenBank; Havana transcript; UCSC Genes; ccdsGene; circbase; Guo	chr17	coding
TC0900007047.hg.1	-1.93579	0.450035	27019	DNAI1	dynein, axonemal, intermediate chain 1	NM_001281428; NM_012144; ENST00000242317; ENST00000437363; ENST00000442556; ENST00000470169; ENST00000470982; ENST00000485580; ENST00000488369; ENST00000488790; ENST00000614641; BC030583; OTTHUMT00000052192; OTTHUMT00000052193; OTTHUMT00000052194; OTTHUMT00000052195; OTTHUMT00000052196; OTTHUMT00000052197; OTTHUMT00000052198; OTTHUMT00000052199; CCDS6557.1; CCDS75829.1; DNAI1.sAug10; uc003zum.5; …	RefSeq; ENSEMBL; GenBank; Havana transcript; ccdsGene; Ace View; UCSC Genes; lncRNAWiki; NONCODE	chr9	coding
TC0800012147.hg.1	-1.93553	0.0104551	7264	TSTA3	tissue specific transplantation antigen P35B	NM_003313; ENST00000425753; ENST00000524719; ENST00000525274; ENST00000526290; ENST00000527006; ENST00000527549; ENST00000527677; ENST00000528920; ENST00000529048; ENST00000529064; ENST00000529899; ENST00000530474; ENST00000531006; ENST00000531473; ENST00000532308; ENST00000533817; BC001941; BC093061; OTTHUMT00000382261; OTTHUMT00000382262; OTTHUMT00000382263; OTTHUMT00000382264; OTTHUMT000003822…	RefSeq; ENSEMBL; GenBank; Havana transcript; ccdsGene; circbase; Ace View; UCSC Genes; lncRNAWiki; NONCODE	chr8	coding
TC0700013435.hg.1	-1.93418	0.221129	222256	CDHR3	cadherin-related family member 3	ENST00000472116; ENST00000474330; ENST00000487084; OTTHUMT00000349022; OTTHUMT00000349024; OTTHUMT00000349029; uc064guy.1; uc064guz.1; uc064gvc.1; NONHSAT122627; NONHSAT122628; NONHSAT122629; NONHSAT122630; NONHSAT122631; NONHSAT122633; NONHSAT122634; NONHSAT122635	ENSEMBL; Havana transcript; UCSC Genes; lncRNAWiki; NONCODE	chr7	coding
TC1500008554.hg.1	-1.93412	0.193742	79705	LRRK1	leucine-rich repeat kinase 1	NM_024652; ENST00000388948; ENST00000525284; ENST00000525395; ENST00000525617; ENST00000526457; ENST00000527698; ENST00000531270; ENST00000532029; ENST00000532145; ENST00000534045; ENST00000538064; OTTHUMT00000384564; OTTHUMT00000384565; OTTHUMT00000384566; OTTHUMT00000384567; OTTHUMT00000384568; OTTHUMT00000384569; OTTHUMT00000384570; OTTHUMT00000384571; OTTHUMT00000384572; OTTHUMT00000384573; O…	RefSeq; ENSEMBL; Havana transcript; GenBank; ccdsGene; circbase; Ace View; UCSC Genes; Guo	chr15	coding
TC0600011615.hg.1	-1.9341	0.024462		DEF6	Memczak2013 ANTISENSE, CDS, coding, INTERNAL best transcript NM_022047	hsa_circ_0001598	circbase	chr6	ncrna
TC0300013264.hg.1	-1.93365	0.00601317	59345	GNB4	guanine nucleotide binding protein (G protein), beta polypeptide 4	NM_021629; ENST00000232564; ENST00000465153; ENST00000466899; ENST00000468623; ENST00000497513; BC000873; OTTHUMT00000258218; OTTHUMT00000348858; OTTHUMT00000348859; OTTHUMT00000348860; OTTHUMT00000348861; CCDS3230.1; ENST00000595265.1; GNB4.dAug10; hsa_circ_0001364; hsa_circ_0005009; hsa_circ_0005319; hsa_circ_0068082; hsa_circ_0068083; hsa_circ_0068084; hsa_circ_0068085; hsa_circ_0068086; hsa_c…	RefSeq; ENSEMBL; GenBank; Havana transcript; ccdsGene; lncRNAWiki; Ace View; circbase; UCSC Genes; RNACentral; NONCODE	chr3	coding
TC0700007392.hg.1	-1.93224	0.00415386	4967	OGDH	oxoglutarate (alpha-ketoglutarate) dehydrogenase (lipoamide)	NM_001003941; NM_001165036; NM_002541; ENST00000222673; ENST00000419661; ENST00000439616; ENST00000443864; ENST00000444676; ENST00000447398; ENST00000449767; ENST00000459672; ENST00000497326; ENST00000631326; BC004964; BC014617; OTTHUMT00000339391; OTTHUMT00000339392; OTTHUMT00000339393; OTTHUMT00000339395; OTTHUMT00000339396; OTTHUMT00000339397; OTTHUMT00000339398; OTTHUMT00000339399; OTTHUMT000…	RefSeq; ENSEMBL; GenBank; Havana transcript; ccdsGene; circbase; Ace View; UCSC Genes; Guo; NONCODE	chr7	coding
TC1600009749.hg.1	-1.92984	0.169409	10595	ERN2	endoplasmic reticulum to nucleus signaling 2	NM_001308220; NM_033266; ENST00000256797; ENST00000457008; ENST00000561478; ENST00000562458; ENST00000562562; ENST00000566565; ENST00000569903; OTTHUMT00000434886; OTTHUMT00000434887; OTTHUMT00000434888; OTTHUMT00000434890; OTTHUMT00000434891; OTTHUMT00000435296; OTTHUMT00000435297; BC157113; CCDS32407.1; ERN2.iAug10; uc002dma.5; uc059sdy.1; uc059sdz.1; uc059sea.1; uc059sec.1; uc059sed.1; uc059se…	RefSeq; ENSEMBL; Havana transcript; GenBank; ccdsGene; Ace View; UCSC Genes; lncRNAWiki; NONCODE	chr16	coding
TC0700013162.hg.1	-1.92963	0.00994103	22976	PAXIP1	PAX interacting (with transcription-activation domain) protein 1	NM_007349; ENST00000397192; ENST00000404141; ENST00000419436; ENST00000457196; ENST00000464717; ENST00000473219; ENST00000475066; ENST00000485730; ENST00000494182; BC033781; OTTHUMT00000322223; OTTHUMT00000322224; OTTHUMT00000322225; OTTHUMT00000322227; OTTHUMT00000322228; OTTHUMT00000322229; OTTHUMT00000322230; OTTHUMT00000322231; CCDS47753.1; hsa_circ_0083069; hsa_circ_0083070; hsa_circ_0083071…	RefSeq; ENSEMBL; GenBank; Havana transcript; ccdsGene; circbase; UCSC Genes; Guo; lncRNAWiki; NONCODE	chr7	coding
TC0100007442.hg.1	-1.92955	0.604138	51042	ZNF593	zinc finger protein 593	NM_015871; ENST00000270812; ENST00000374266; BC002580; BC019267; OTTHUMT00000019842; OTTHUMT00000019843; CCDS275.2; hsa_circ_0010967; hsa_circ_0010968; hsa_circ_0010969; uc001bll.5; uc057dow.1	RefSeq; ENSEMBL; GenBank; Havana transcript; ccdsGene; circbase; UCSC Genes	chr1	coding
TC0800007114.hg.1	-1.92941	0.0335557	51435	SCARA3	scavenger receptor class A, member 3	NM_016240; NM_182826; ENST00000301904; ENST00000337221; BC060811; BC075067; BC075068; OTTHUMT00000376258; OTTHUMT00000376259; CCDS34870.1; CCDS34871.1; hsa_circ_0083771; hsa_circ_0083772; hsa_circ_0083773; hsa_circ_0083774; hsa_circ_0083775; hsa_circ_0083776; hsa_circ_0083777; hsa_circ_0083778; SCARA3.aAug10; uc003xga.2; uc003xgb.2	RefSeq; ENSEMBL; GenBank; Havana transcript; ccdsGene; circbase; Ace View; UCSC Genes	chr8	coding
TC1900010748.hg.1	-1.92875	0.0433451	55101	ATP5SL	ATP5S-like	NM_001167867; NM_001167868; NM_001167869; NM_001167870; NM_001167871; NM_018035; NR_030765; ENST00000221943; ENST00000301183; ENST00000417807; ENST00000438807; ENST00000586786; ENST00000589102; ENST00000589503; ENST00000589970; ENST00000590641; ENST00000592922; ENST00000594339; ENST00000594660; ENST00000595407; ENST00000595425; ENST00000597457; ENST00000597608; BC013323; OTTHUMT00000460600; OTTHU…	RefSeq; ENSEMBL; GenBank; Havana transcript; Ace View; ccdsGene; circbase; UCSC Genes; lncRNAWiki; NONCODE	chr19	coding
TC0100016135.hg.1	-1.92851	0.389306	114836	SLAMF6	SLAM family member 6	NM_001184714; NM_001184715; NM_001184716; NM_052931; ENST00000368055; ENST00000368057; ENST00000368059; BC113893; BC114495; OTTHUMT00000059010; OTTHUMT00000059011; OTTHUMT00000059012; uc001fwd.2; CCDS1205.1; CCDS53393.1; CCDS53394.1; uc001fwe.3; uc010pji.3	RefSeq; ENSEMBL; GenBank; Havana transcript; UCSC Genes; ccdsGene	chr1	coding
TC0800012213.hg.1	-1.92664	0.115527	51160	VPS28	vacuolar protein sorting 28 homolog (S. cerevisiae)	NM_016208; NM_183057; ENST00000292510; ENST00000377348; ENST00000524521; ENST00000526054; ENST00000526204; ENST00000526734; ENST00000526977; ENST00000527797; ENST00000528142; ENST00000529182; ENST00000530790; ENST00000530836; ENST00000530983; ENST00000531032; ENST00000531924; ENST00000533806; BC006485; BC019321; BC050713; OTTHUMT00000382692; OTTHUMT00000382693; OTTHUMT00000382694; OTTHUMT00000382…	RefSeq; ENSEMBL; GenBank; Havana transcript; ccdsGene; circbase; UCSC Genes; lncRNAWiki; NONCODE	chr8	coding
TC1200007120.hg.1	-1.92647	0.316636	11228	RASSF8	Ras association (RalGDS/AF-6) domain family (N-terminal) member 8	NM_001164746; NM_001164747; NM_001164748; NM_007211; ENST00000282884; ENST00000381352; ENST00000405154; ENST00000535907; ENST00000537946; ENST00000538081; ENST00000538365; ENST00000539545; ENST00000541218; ENST00000541490; ENST00000542004; ENST00000542315; ENST00000542865; ENST00000545413; ENST00000611440; ENST00000615708; BC030021; OTTHUMT00000402208; OTTHUMT00000402209; OTTHUMT00000402210; OTTH…	RefSeq; ENSEMBL; GenBank; Havana transcript; ccdsGene; circbase; UCSC Genes; Guo; lncRNAWiki; NONCODE	chr12	coding
TC0800009190.hg.1	-1.92616	0.156647	79943	ZNF696	zinc finger protein 696	NM_030895; ENST00000330143; ENST00000518432; ENST00000518575; ENST00000520333; ENST00000521537; ENST00000523891; BC126317; OTTHUMT00000381159; OTTHUMT00000381160; OTTHUMT00000381161; OTTHUMT00000381162; OTTHUMT00000381163; OTTHUMT00000381164; CCDS6399.1; uc003yxy.5; uc064qxs.1; uc064qxu.1; uc064qxv.1; uc064qxw.1; uc064qxx.1	RefSeq; ENSEMBL; GenBank; Havana transcript; ccdsGene; UCSC Genes	chr8	coding
TC0100008417.hg.1	-1.92221	0.019146	255738	PCSK9	proprotein convertase subtilisin/kexin type 9	NM_174936; NR_110451; ENST00000302118; ENST00000490692; OTTHUMT00000022279; OTTHUMT00000022280; BC166619; CCDS603.1; hsa_circ_0012677; hsa_circ_0012678; hsa_circ_0012679; hsa_circ_0012680; hsa_circ_0012681; uc001cyf.3; uc057gwc.1	RefSeq; ENSEMBL; Havana transcript; GenBank; ccdsGene; circbase; UCSC Genes	chr1	coding
TC1900011056.hg.1	-1.92202	0.16661	56344	CABP5	calcium binding protein 5	NM_019855; ENST00000293255; ENST00000602032; BC126133; BC126135; OTTHUMT00000465212; OTTHUMT00000465213; CABP5.bAug10; CCDS12709.1; uc002phu.3; uc061apc.1; NONHSAT067023	RefSeq; ENSEMBL; GenBank; Havana transcript; Ace View; ccdsGene; UCSC Genes; lncRNAWiki; NONCODE	chr19	coding
TC0100015952.hg.1	-1.91922	0.087224	1196	CLK2	CDC like kinase 2	NM_001294338; NM_003993; ENST00000355560; ENST00000361168; ENST00000368361; ENST00000471047; ENST00000476983; ENST00000484699; ENST00000497188; BC014067; BC053603; OTTHUMT00000087391; OTTHUMT00000087392; OTTHUMT00000087393; OTTHUMT00000087394; OTTHUMT00000087395; OTTHUMT00000087397; OTTHUMT00000087398; NM_001294339_2; CCDS1107.1; CCDS72939.1; hsa_circ_0014521; hsa_circ_0014522; hsa_circ_0014523; …	RefSeq; ENSEMBL; GenBank; Havana transcript; ccdsGene; circbase; UCSC Genes; Guo; lncRNAWiki; NONCODE	chr1	coding
TC1200012181.hg.1	-1.91919	0.345797	121665	SPPL3	signal peptide peptidase like 3	NM_139015; ENST00000353487; ENST00000392495; ENST00000534966; ENST00000536996; ENST00000540091; ENST00000543181; ENST00000543608; ENST00000543854; ENST00000545209; BC073910; BC101625; BC101627; OTTHUMT00000402980; OTTHUMT00000402981; OTTHUMT00000403019; OTTHUMT00000403020; OTTHUMT00000403021; OTTHUMT00000403022; OTTHUMT00000403023; OTTHUMT00000403024; OTTHUMT00000403025; CCDS9208.1; hsa_circ_0002…	RefSeq; ENSEMBL; GenBank; Havana transcript; ccdsGene; circbase; UCSC Genes; Guo; lncRNAWiki; NONCODE	chr12	coding
TC1800006852.hg.1	-1.91816	0.00761464	2627	GATA6	GATA binding protein 6	NM_005257; ENST00000269216; ENST00000581694; OTTHUMT00000254696; OTTHUMT00000446377; CCDS11872.1; GATA6.bAug10; uc002ktt.2; uc002ktu.3	RefSeq; ENSEMBL; Havana transcript; ccdsGene; Ace View; UCSC Genes	chr18	coding
TC1600008015.hg.1	-1.91791	0.0191727	388282	LOC388282; CTD-2600O9.1	uncharacterized LOC388282; novel transcript	NM_001278081; OTTHUMT00000433165; OTTHUMT00000433166; OTTHUMT00000433167; uc032eba.2; uc059uyi.1; uc059uyj.1; ENST00000335616; ENST00000568697; ENST00000620696; LN608603.1:1..597:ncRNA; LN608604.1:1..718:ncRNA; LN608605.1:1..1317:ncRNA; NONHSAT142795; NONHSAT142796	RefSeq; Havana transcript; UCSC Genes; ENSEMBL; RNACentral; lncRNAWiki; NONCODE	chr16	coding
TC2000006823.hg.1	-1.91789	0.240519	7692	ZNF133	zinc finger protein 133	NM_001083330; NM_001282995; NM_001282996; NM_001282997; NM_001282998; NM_001282999; NM_001283000; NM_001283001; NM_001283002; NM_001283003; NM_001283004; NM_001283005; NM_001283006; NM_001283007; NM_001283008; NM_003434; ENST00000316358; ENST00000360010; ENST00000377671; ENST00000396026; ENST00000401790; ENST00000402618; ENST00000425686; ENST00000434018; ENST00000462170; ENST00000535822; ENST0000…	RefSeq; ENSEMBL; GenBank; Havana transcript; ccdsGene; circbase; UCSC Genes; Ace View; Guo	chr20	coding
TC1200010756.hg.1	-1.91768	0.0037855	3854	KRT6B	keratin 6B, type II	NM_005555; ENST00000252252; BC034535; OTTHUMT00000404969; uc001sak.3; CCDS8828.1; hsa_circ_0026391; hsa_circ_0026392; hsa_circ_0026393; hsa_circ_0026394; hsa_circ_0026395; hsa_circ_0026396; hsa_circ_0026397; hsa_circ_0026398; hsa_circ_0026399; hsa_circ_0026400; hsa_circ_0026401; hsa_circ_0026402; hsa_circ_0026403; hsa_circ_0026404; hsa_circ_0026405; hsa_circ_0026406; hsa_circ_0026407; hsa_circ_00…	RefSeq; ENSEMBL; GenBank; Havana transcript; UCSC Genes; ccdsGene; circbase	chr12	coding
TC1900011469.hg.1	-1.91675	0.409492	388564	TMEM238	transmembrane protein 238	NM_001190764; ENST00000444469; OTTHUMT00000453043; CCDS54323.1; hsa_circ_0052236; uc002qku.4	RefSeq; ENSEMBL; Havana transcript; ccdsGene; circbase; UCSC Genes	chr19	coding
TC1400009175.hg.1	-1.91668	0.354649	22795	NID2	nidogen 2 (osteonidogen)	NM_007361; ENST00000216286; ENST00000541773; ENST00000553297; ENST00000554284; ENST00000555310; ENST00000556572; ENST00000556686; ENST00000557051; ENST00000617139; BC035608; OTTHUMT00000276888; OTTHUMT00000411605; OTTHUMT00000411606; OTTHUMT00000411607; OTTHUMT00000411608; OTTHUMT00000411609; OTTHUMT00000411610; CCDS9706.1; hsa_circ_0031925; hsa_circ_0031926; hsa_circ_0031927; hsa_circ_0031928; h…	RefSeq; ENSEMBL; GenBank; Havana transcript; ccdsGene; circbase; Ace View; UCSC Genes	chr14	coding
TC0500012980.hg.1	-1.91645	0.0207508	54540	FAM193B	family with sequence similarity 193, member B	NM_001190946; NR_024019; ENST00000502403; ENST00000504130; ENST00000505241; ENST00000505569; ENST00000506064; ENST00000506432; ENST00000506879; ENST00000506955; ENST00000507212; ENST00000507587; ENST00000508298; ENST00000510163; ENST00000510429; ENST00000510479; ENST00000513282; ENST00000513502; ENST00000514747; ENST00000515394; ENST00000524677; BC008784; OTTHUMT00000373119; OTTHUMT00000373120; O…	RefSeq; ENSEMBL; GenBank; Havana transcript; ccdsGene; Ace View; circbase; UCSC Genes; Guo; lncRNAWiki; NONCODE	chr5	coding
TC0100010674.hg.1	-1.91555	0.0457433	9293	GPR52	G protein-coupled receptor 52	NM_005684; ENST00000367685; BC067456; BC067457; BC067458; BC067459; BC067460; BC069460; BC095532; OTTHUMT00000084511; CCDS30941.1; uc001gka.2	RefSeq; ENSEMBL; GenBank; Havana transcript; ccdsGene; UCSC Genes	chr1	coding
TC1700008879.hg.1	-1.91511	0.0637875	3396	ICT1	immature colon carcinoma transcript 1	NM_001303265; NM_001545; ENST00000301585; ENST00000580800; ENST00000583772; ENST00000584208; BC015335; OTTHUMT00000445314; OTTHUMT00000445315; OTTHUMT00000445316; OTTHUMT00000448375; CCDS11711.1; hsa_circ_0045578; hsa_circ_0045579; hsa_circ_0045580; hsa_circ_0045581; hsa_circ_0045582; hsa_circ_0045583; hsa_circ_0045584; ICT1.bAug10; ICT1.gAug10; uc002jmm.4; uc060jsg.1; uc060jsh.1; uc060jsi.1	RefSeq; ENSEMBL; GenBank; Havana transcript; ccdsGene; circbase; Ace View; UCSC Genes	chr17	coding
TC1100008101.hg.1	-1.91503	0.0239096	9986; 79703	RCE1; C11orf80	Ras converting CAAX endopeptidase 1; chromosome 11 open reading frame 80	NM_001032279; NM_001302084; NM_005133; NM_024650; ENST00000309657; ENST00000360962; ENST00000524506; ENST00000524551; ENST00000524849; ENST00000525356; ENST00000525449; ENST00000525908; ENST00000526260; ENST00000526270; ENST00000526718; ENST00000527352; ENST00000527368; ENST00000527634; ENST00000530610; ENST00000531400; ENST00000531415; ENST00000532089; ENST00000532565; ENST00000532727; ENST00000…	RefSeq; ENSEMBL; GenBank; Havana transcript; Ace View; ccdsGene; circbase; UCSC Genes; Guo; lncRNAWiki; NONCODE	chr11	coding
TC1600009966.hg.1	-1.91229	0.0082736	79077	DCTPP1	dCTP pyrophosphatase 1	NM_024096; ENST00000319285; ENST00000565758; ENST00000567983; ENST00000568434; ENST00000568973; BC001344; OTTHUMT00000255553; OTTHUMT00000434615; OTTHUMT00000434616; OTTHUMT00000434617; OTTHUMT00000434618; CCDS10680.1; DCTPP1.aAug10; hsa_circ_0039036; hsa_circ_0039037; uc002dyf.4; uc059teg.1; uc059teh.1; uc059tei.1; uc059tej.1	RefSeq; ENSEMBL; GenBank; Havana transcript; ccdsGene; Ace View; circbase; UCSC Genes	chr16	coding
TC1100013056.hg.1	-1.91123	0.0409225	57571	CARNS1	carnosine synthase 1	NM_001166222; NM_020811; ENST00000307823; ENST00000445895; ENST00000531040; ENST00000531388; ENST00000531958; OTTHUMT00000395499; OTTHUMT00000395500; OTTHUMT00000395501; OTTHUMT00000395502; uc009yrp.3; CCDS44658.1; CCDS53667.1; uc058ega.1; uc058egb.1; uc058egc.1; uc058egd.1	RefSeq; ENSEMBL; Havana transcript; UCSC Genes; ccdsGene	chr11	coding
TC1200010185.hg.1	-1.91105	0.158721	3709	ITPR2	inositol 1,4,5-trisphosphate receptor, type 2	NM_002223; ENST00000242737; ENST00000381340; ENST00000451599; ENST00000536627; ENST00000538984; ENST00000540429; ENST00000540791; ENST00000543958; ENST00000545235; ENST00000545902; OTTHUMT00000402732; OTTHUMT00000402733; OTTHUMT00000402734; OTTHUMT00000402735; OTTHUMT00000402814; OTTHUMT00000402816; OTTHUMT00000402817; OTTHUMT00000403292; OTTHUMT00000403293; OTTHUMT00000403294; BC172383; CCDS4176…	RefSeq; ENSEMBL; Havana transcript; GenBank; ccdsGene; lncRNAWiki; circbase; Ace View; UCSC Genes; Guo; RNACentral; NONCODE	chr12	coding
TC0200015424.hg.1	-1.90937	0.69968	130540	ALS2CR12	amyotrophic lateral sclerosis 2 chromosome region candidate 12	NM_001127391; NM_001289993; NM_139163; NR_110620; ENST00000286190; ENST00000392257; ENST00000405148; ENST00000415745; ENST00000418364; ENST00000425488; ENST00000439709; ENST00000448967; ENST00000494171; ENST00000494223; BC031603; OTTHUMT00000256286; OTTHUMT00000256287; OTTHUMT00000336900; OTTHUMT00000336901; OTTHUMT00000336902; OTTHUMT00000336903; OTTHUMT00000336904; OTTHUMT00000336905; OTTHUMT00…	RefSeq; ENSEMBL; GenBank; Havana transcript; UCSC Genes; ccdsGene; circbase; Ace View; Guo; lncRNAWiki; NONCODE	chr2	coding
TC0100017084.hg.1	-1.9087	0.00177196	1510	CTSE	cathepsin E	NM_001910; NM_148964; ENST00000358184; ENST00000360218; ENST00000468617; ENST00000486757; BC042537; OTTHUMT00000087998; OTTHUMT00000087999; OTTHUMT00000088000; OTTHUMT00000088001; uc001hdu.3; CCDS73012.1; CCDS73013.1; CTSE.aAug10; uc001hdv.4; uc057ovi.1; uc057ovj.1; NONHSAT009056	RefSeq; ENSEMBL; GenBank; Havana transcript; UCSC Genes; ccdsGene; Ace View; lncRNAWiki; NONCODE	chr1	coding
TC0100018482.hg.1	-1.9061	0.0167644	723790; 8337	HIST2H2AA4; HIST2H2AA3	histone cluster 2, H2aa4; histone cluster 2, H2aa3	NM_001040874; ENST00000369159; OTTHUMT00000477885; NM_003516_2; CCDS934.1; uc001esw.4; BC096705; BC096739; BC098171	RefSeq; ENSEMBL; Havana transcript; ccdsGene; UCSC Genes; GenBank	chr1	coding
TC1400007154.hg.1	-1.90527	0.171345	54331	GNG2	guanine nucleotide binding protein (G protein), gamma 2	NM_001243773; NM_001243774; NM_053064; ENST00000335281; ENST00000553299; ENST00000553432; ENST00000553560; ENST00000554736; ENST00000554832; ENST00000554840; ENST00000554875; ENST00000555472; ENST00000556471; ENST00000556522; ENST00000556752; ENST00000556766; ENST00000557208; ENST00000557376; ENST00000615906; BC020774; BC060856; OTTHUMT00000411579; OTTHUMT00000411580; OTTHUMT00000411581; OTTHUMT0…	RefSeq; ENSEMBL; GenBank; Havana transcript; UCSC Genes; ccdsGene; Ace View; lncRNAWiki; NONCODE	chr14	coding
TC0600008468.hg.1	-1.90395	0.013862	57579	FAM135A	family with sequence similarity 135, member A	NM_001105531; NM_001162529; NM_020819; ENST00000194672; ENST00000361499; ENST00000370479; ENST00000393299; ENST00000418814; ENST00000425415; ENST00000457062; ENST00000505675; ENST00000505769; ENST00000505868; ENST00000507049; ENST00000507085; ENST00000508844; ENST00000514185; ENST00000515280; ENST00000515323; BC131782; OTTHUMT00000041137; OTTHUMT00000041138; OTTHUMT00000041139; OTTHUMT00000360643…	RefSeq; ENSEMBL; GenBank; Havana transcript; ccdsGene; circbase; UCSC Genes; Guo; lncRNAWiki; NONCODE	chr6	coding
TC2000007177.hg.1	-1.90355	0.0523444		RALY	Jeck2013 ALT_DONOR, coding, INTERNAL, intronic best transcript NM_016732	hsa_circ_0008084	circbase	chr20	ncrna
TC0100015109.hg.1	-1.90328	0.0397774	101928436	LOC101928436; RP11-153F1.1; RP11-347K2.2; teyfawbu	uncharacterized LOC101928436; novel transcript; Transcript Identified by AceView	NM_001286997; ENST00000444810.1; ENST00000447322.2; ENST00000451705.1; ENST00000455771.1; OTTHUMT00000099062; OTTHUMT00000099063; teyfawbu.bAug10; uc031ujq.2; uc057isr.1; ENST00000444810; ENST00000447322; HG492342.1:1..527:ncRNA; HG492343.1:1..470:ncRNA; lnc-AMY1B-1:1; lnc-AMY1B-1:2; lnc-AMY1B-1:3; lnc-AMY1B-1:4; NONHSAT004887; NONHSAT004888; NONHSAT004889; NONHSAT004891; NONHSAT004892; T016321; …	RefSeq; lncRNAWiki; Havana transcript; Ace View; UCSC Genes; ENSEMBL; RNACentral; NONCODE; miTranscriptome; lncRNA Db	chr1	coding
TC1600006886.hg.1	-1.9023	0.0159518	4682	NUBP1	nucleotide binding protein 1	NM_001278506; NM_002484; ENST00000283027; ENST00000433392; ENST00000571175; ENST00000571790; ENST00000573663; ENST00000574137; ENST00000574334; ENST00000574691; BC100290; BC109322; BC109323; OTTHUMT00000251964; OTTHUMT00000436373; OTTHUMT00000436374; OTTHUMT00000436375; OTTHUMT00000436376; OTTHUMT00000436377; OTTHUMT00000436378; OTTHUMT00000436379; CCDS10543.1; CCDS61839.1; hsa_circ_0037813; hsa_…	RefSeq; ENSEMBL; GenBank; Havana transcript; ccdsGene; circbase; Ace View; UCSC Genes; lncRNAWiki; NONCODE	chr16	coding
TC0500012388.hg.1	-1.90213	0.170958	1809	DPYSL3	dihydropyrimidinase-like 3	NM_001197294; NM_001387; ENST00000343218; ENST00000398514; ENST00000504965; ENST00000507309; ENST00000508042; ENST00000512722; ENST00000519672; ENST00000520473; ENST00000523458; BC039006; BC077077; OTTHUMT00000373421; OTTHUMT00000373422; OTTHUMT00000373423; OTTHUMT00000373424; OTTHUMT00000373425; OTTHUMT00000373426; OTTHUMT00000377410; OTTHUMT00000377411; OTTHUMT00000377412; CCDS43381.1; CCDS5638…	RefSeq; ENSEMBL; GenBank; Havana transcript; ccdsGene; Ace View; circbase; UCSC Genes; lncRNAWiki; NONCODE	chr5	coding
TC0400011208.hg.1	-1.9007	0.01008	84142	FAM175A	family with sequence similarity 175, member A	NM_139076; ENST00000321945; ENST00000475656; ENST00000503217; ENST00000504777; ENST00000505489; ENST00000506553; ENST00000511801; ENST00000515303; ENST00000611288; BC039573; OTTHUMT00000252818; OTTHUMT00000252819; OTTHUMT00000365072; OTTHUMT00000365073; OTTHUMT00000365074; OTTHUMT00000365075; OTTHUMT00000365076; OTTHUMT00000367683; OTTHUMT00000476307; CCDS3605.2; hsa_circ_0009036; uc003hou.3; uc0…	RefSeq; ENSEMBL; GenBank; Havana transcript; ccdsGene; circbase; UCSC Genes; Guo; lncRNAWiki; NONCODE	chr4	coding
TC1700006758.hg.1	-1.89997	0.00642697	9526	MPDU1	mannose-P-dolichol utilization defect 1	NM_004870; NR_024603; ENST00000250124; ENST00000359822; ENST00000396501; ENST00000423172; ENST00000570458; ENST00000571391; ENST00000571822; ENST00000571877; ENST00000572719; ENST00000572836; ENST00000572936; ENST00000574558; ENST00000575256; ENST00000576066; ENST00000576272; ENST00000577088; ENST00000578267; ENST00000579445; ENST00000580708; ENST00000580834; ENST00000581380; ENST00000581886; ENS…	RefSeq; ENSEMBL; GenBank; Havana transcript; ccdsGene; circbase; Ace View; UCSC Genes; lncRNAWiki; NONCODE	chr17	coding
TC0200009949.hg.1	-1.89902	0.255472	80067	DCAF17	DDB1 and CUL4 associated factor 17	NM_001164821; NM_025000; NR_028482; ENST00000339506; ENST00000375255; ENST00000431110; ENST00000436317; ENST00000468592; ENST00000480855; ENST00000490217; ENST00000493106; ENST00000495925; ENST00000498486; ENST00000539783; ENST00000611110; BC140843; OTTHUMT00000255342; OTTHUMT00000255343; OTTHUMT00000333785; OTTHUMT00000333786; OTTHUMT00000333787; OTTHUMT00000333788; OTTHUMT00000333789; OTTHUMT00…	RefSeq; ENSEMBL; GenBank; Havana transcript; UCSC Genes; ccdsGene; Ace View; circbase; Guo; lncRNAWiki; NONCODE	chr2	coding
TC2000007760.hg.1	-1.89814	0.175611	128553	TSHZ2	teashirt zinc finger homeobox 2	NM_001193421; NM_173485; ENST00000329613; ENST00000371497; ENST00000603338; ENST00000605656; ENST00000626626; OTTHUMT00000080398; OTTHUMT00000259177; OTTHUMT00000470818; uc002xwo.3; BC160051; CCDS33490.1; CCDS54474.1; uc021wex.2; uc061xuk.1; uc061xun.1; uc061xuq.1	RefSeq; ENSEMBL; Havana transcript; UCSC Genes; GenBank; ccdsGene	chr20	coding
TC1900009648.hg.1	-1.89635	0.0680588	11018	TMED1	transmembrane p24 trafficking protein 1	NM_006858; NR_104015; ENST00000214869; ENST00000586835; ENST00000588259; ENST00000588289; ENST00000589638; ENST00000591157; ENST00000591695; BC002443; OTTHUMT00000452614; OTTHUMT00000452615; OTTHUMT00000452616; OTTHUMT00000452617; OTTHUMT00000452618; OTTHUMT00000452619; OTTHUMT00000452620; CCDS12249.1; TMED1.cAug10; uc002mpy.5; uc060tmn.1; uc060tmo.1; uc060tmp.1; uc060tmq.1; uc060tmr.1; uc060tms.1	RefSeq; ENSEMBL; GenBank; Havana transcript; ccdsGene; Ace View; UCSC Genes	chr19	coding
TC0100006852.hg.1	-1.89537	0.00365966	23254	IKBKE	inhibitor of kappa light polypeptide gene enhancer in B-cells, kinase epsilon	NM_013319; ENST00000376804; ENST00000376810; ENST00000483738; ENST00000486588; BC004468; OTTHUMT00000005773; OTTHUMT00000005774; OTTHUMT00000005775; OTTHUMT00000005776; CCDS129.1; hsa_circ_0009848; uc001asg.4; uc057cgd.1; uc057cge.1; uc057cgf.1	RefSeq; ENSEMBL; GenBank; Havana transcript; ccdsGene; circbase; UCSC Genes	chr1	coding
TC1000008516.hg.1	-1.89385	0.107716	142827	ACSM6	acyl-CoA synthetase medium-chain family member 6	NM_207321; ENST00000327739; ENST00000341686; ENST00000394005; ENST00000404473; OTTHUMT00000049506; OTTHUMT00000346852; OTTHUMT00000346853; C10orf129.bAug10; CCDS7440.2; uc001kke.4; uc057vab.1; uc057vac.1; uc057vad.1	RefSeq; ENSEMBL; Havana transcript; Ace View; ccdsGene; UCSC Genes	chr10	coding
TC1000009535.hg.1	-1.89054	0.30665	91734	IDI2	isopentenyl-diphosphate delta isomerase 2	NM_033261; ENST00000277517; BC017778; OTTHUMT00000046411; uc001ifv.1; CCDS7055.1	RefSeq; ENSEMBL; GenBank; Havana transcript; UCSC Genes; ccdsGene	chr10	coding
TC0100010161.hg.1	-1.89032	0.00793868	11243; 100527963; 632	PMF1; PMF1-BGLAP; BGLAP	polyamine-modulated factor 1; PMF1-BGLAP readthrough; bone gamma-carboxyglutamate (gla) protein	NM_001199653; NM_001199654; NM_001199661; NM_001199662; NM_001199663; NM_001199664; NM_007221; NM_199173; ENST00000320139; ENST00000368272; ENST00000368273; ENST00000368276; ENST00000368277; ENST00000368279; ENST00000466489; ENST00000471413; ENST00000490491; ENST00000497069; ENST00000567140; ENST00000606952; BC065031; BC113432; BC113434; OTTHUMT00000040860; OTTHUMT00000040861; OTTHUMT00000040862;…	RefSeq; ENSEMBL; GenBank; Havana transcript; UCSC Genes; ccdsGene; circbase; Ace View; lncRNAWiki; NONCODE	chr1	coding
TC1100007634.hg.1	-1.88911	0.0587986	390157	OR8K1	olfactory receptor, family 8, subfamily K, member 1	NM_001002907; ENST00000279783; BC146844; OTTHUMT00000391605; uc010rjg.2; CCDS31528.1	RefSeq; ENSEMBL; GenBank; Havana transcript; UCSC Genes; ccdsGene	chr11	coding
TC0600014096.hg.1	-1.88891	0.245766	202658	TRIM39-RPP21	TRIM39-RPP21 readthrough	ENST00000513556; ENST00000623385; OTTHUMT00000363942; uc010jsa.2; NM_001199119_7; uc063mrm.1	ENSEMBL; Havana transcript; UCSC Genes; RefSeq	chr6	coding
TC0200008679.hg.1	-1.88744	0.0550634	389015	SLC9A4	solute carrier family 9, subfamily A (NHE4, cation proton antiporter 4), member 4	NM_001011552; ENST00000295269; ENST00000492154; OTTHUMT00000329498; OTTHUMT00000329499; uc002tbz.4; BC160158; CCDS33264.1; uc061mmq.1	RefSeq; ENSEMBL; Havana transcript; UCSC Genes; GenBank; ccdsGene	chr2	coding
TC1200012640.hg.1	-1.88572	0.199038	2647	BLOC1S1	biogenesis of lysosomal organelles complex-1, subunit 1	NM_001487; NR_037655; NR_037656; NR_037657; ENST00000547076; ENST00000548556; ENST00000548925; ENST00000549147; ENST00000551926; ENST00000553100; BC130640; BC132795; OTTHUMT00000406681; OTTHUMT00000406682; OTTHUMT00000407487; OTTHUMT00000407488; OTTHUMT00000407489; OTTHUMT00000407490; BLOC1S1andRDH5.tAug10; BLOC1S1andRDH5.vaAug10; CCDS8889.2; hsa_circ_0026783; uc001shi.5; uc009zny.3; uc058pai.1; …	RefSeq; ENSEMBL; GenBank; Havana transcript; Ace View; ccdsGene; circbase; UCSC Genes	chr12	coding
TC1300006810.hg.1	-1.88523	0.0088134	23047	PDS5B	PDS5 cohesin associated factor B	NM_015032; ENST00000315596; ENST00000447833; ENST00000450460; ENST00000466078; ENST00000474274; ENST00000481616; ENST00000482955; ENST00000493653; ENST00000498550; OTTHUMT00000044426; OTTHUMT00000044427; OTTHUMT00000044428; OTTHUMT00000044429; OTTHUMT00000044430; OTTHUMT00000318330; OTTHUMT00000318331; OTTHUMT00000318332; OTTHUMT00000318333; CCDS41878.1; hsa_circ_0004494; hsa_circ_0029940; hsa_ci…	RefSeq; ENSEMBL; Havana transcript; ccdsGene; circbase; Ace View; UCSC Genes; Guo; lncRNAWiki; NONCODE	chr13	coding
TC1100013192.hg.1	-1.88494	0.0323097	23529	CLCF1	cardiotrophin-like cytokine factor 1	NM_001166212; NM_013246; ENST00000312438; ENST00000533438; BC012939; BC066229; BC066230; BC066231; OTTHUMT00000395478; OTTHUMT00000395479; CCDS31617.1; CCDS53666.1; uc001okq.4; uc010rpp.3	RefSeq; ENSEMBL; GenBank; Havana transcript; ccdsGene; UCSC Genes	chr11	coding
TC0100011400.hg.1	-1.8848	0.0419437	5208	PFKFB2	6-phosphofructo-2-kinase/fructose-2,6-biphosphatase 2	NM_001018053; NM_006212; ENST00000367079; ENST00000367080; ENST00000411990; ENST00000464777; ENST00000468857; ENST00000473310; ENST00000483688; ENST00000545806; ENST00000615360; ENST00000618513; BC069350; BC069385; BC069583; BC069586; BC069600; BC075075; BC075076; BC112103; BC112105; OTTHUMT00000087838; OTTHUMT00000087839; OTTHUMT00000087840; OTTHUMT00000087841; OTTHUMT00000087842; OTTHUMT0000008…	RefSeq; ENSEMBL; GenBank; Havana transcript; ccdsGene; circbase; Ace View; UCSC Genes; lncRNAWiki; NONCODE	chr1	coding
TC1900009382.hg.1	-1.88265	0.00843843	5802	PTPRS	protein tyrosine phosphatase, receptor type, S	NM_002850; NM_130853; NM_130854; NM_130855; ENST00000262963; ENST00000348075; ENST00000353284; ENST00000357368; ENST00000586065; ENST00000587303; ENST00000588012; ENST00000588552; ENST00000589851; ENST00000590509; ENST00000591760; ENST00000592099; BC104812; BC143287; OTTHUMT00000450761; OTTHUMT00000450762; OTTHUMT00000450763; OTTHUMT00000450764; OTTHUMT00000450765; OTTHUMT00000450787; OTTHUMT0000…	RefSeq; ENSEMBL; GenBank; Havana transcript; UCSC Genes; ccdsGene; circbase; Ace View; Guo; lncRNAWiki; NONCODE	chr19	coding
TC0900012209.hg.1	-1.88221	0.0794704	158219	TTC39B	tetratricopeptide repeat domain 39B	NM_001168339; NM_001168340; NM_001168341; NM_001168342; NM_152574; ENST00000297615; ENST00000380850; ENST00000380853; ENST00000505732; ENST00000506891; ENST00000507285; ENST00000507993; ENST00000582994; BC142985; OTTHUMT00000051760; OTTHUMT00000371768; OTTHUMT00000371769; OTTHUMT00000371770; OTTHUMT00000371771; OTTHUMT00000447019; CCDS55294.1; CCDS55295.1; CCDS55296.1; CCDS6477.2; hsa_circ_008639…	RefSeq; ENSEMBL; GenBank; Havana transcript; ccdsGene; circbase; UCSC Genes; lncRNAWiki; NONCODE	chr9	coding
TC0400008641.hg.1	-1.88149	0.116827	79633	FAT4	FAT atypical cadherin 4	NM_001291285; NM_001291303; NM_024582; ENST00000335110; ENST00000394329; ENST00000509444; OTTHUMT00000256765; OTTHUMT00000313530; OTTHUMT00000363926; CCDS3732.3; FAT4.fAug10; hsa_circ_0070896; hsa_circ_0070897; hsa_circ_0070898; hsa_circ_0070899; hsa_circ_0070900; hsa_circ_0070901; hsa_circ_0070902; uc003ifj.5; uc011cgp.3; uc062zle.1; chr4_126389666_126402893	RefSeq; ENSEMBL; Havana transcript; ccdsGene; Ace View; circbase; UCSC Genes; Guo	chr4	coding
TC0500009055.hg.1	-1.88068	0.592618	22885	ABLIM3	actin binding LIM protein family, member 3	NM_001301015; NM_001301018; NM_001301027; NM_001301028; NM_014945; ENST00000309868; ENST00000326685; ENST00000356541; ENST00000502855; ENST00000504238; ENST00000506113; ENST00000508983; ENST00000514212; ENST00000515171; ENST00000515796; ENST00000517451; ENST00000519549; BC001665; OTTHUMT00000252188; OTTHUMT00000373435; OTTHUMT00000373436; OTTHUMT00000373437; OTTHUMT00000373438; OTTHUMT00000373439…	RefSeq; ENSEMBL; GenBank; Havana transcript; ccdsGene; circbase; UCSC Genes; lncRNAWiki; NONCODE	chr5	coding
TC0X00008120.hg.1	-1.87888	0.0871919	57529	RGAG1	retrotransposon gag domain containing 1	NM_020769; ENST00000465301; ENST00000520821; ENST00000540313; BC113670; BC117184; OTTHUMT00000057906; OTTHUMT00000375734; uc004eor.2; CCDS14552.1; RGAG1.aAug10; uc065aru.1; uc065arv.1	RefSeq; ENSEMBL; GenBank; Havana transcript; UCSC Genes; ccdsGene; Ace View	chrX	coding
TC0200016562.hg.1	-1.87739	0.320942	493911	PHOSPHO2	phosphatase, orphan 2	NM_001008489; NM_001199285; NM_001199286; NM_001199287; NM_001199288; ENST00000359744; ENST00000438710; ENST00000438838; ENST00000449906; ENST00000476919; ENST00000616481; ENST00000616524; ENST00000617738; BC022324; BC106013; OTTHUMT00000333304; OTTHUMT00000333305; OTTHUMT00000333306; OTTHUMT00000333307; OTTHUMT00000333308; CCDS33319.1; hsa_circ_0056966; PHOSPHO2andKLHL23.hAug10; uc002ufg.4; uc02…	RefSeq; ENSEMBL; GenBank; Havana transcript; ccdsGene; circbase; Ace View; UCSC Genes; lncRNAWiki; NONCODE	chr2	coding
TC0300013684.hg.1	-1.87672	0.000862868	7037	TFRC	transferrin receptor	NM_001128148; NM_003234; ENST00000360110; ENST00000392396; ENST00000420415; ENST00000421258; ENST00000426789; ENST00000463047; ENST00000463356; ENST00000464011; ENST00000464368; ENST00000465288; ENST00000475593; ENST00000477148; ENST00000482479; ENST00000483983; ENST00000491658; BC001188; OTTHUMT00000341346; OTTHUMT00000341347; OTTHUMT00000341348; OTTHUMT00000341350; OTTHUMT00000341351; OTTHUMT00…	RefSeq; ENSEMBL; GenBank; Havana transcript; ccdsGene; circbase; Ace View; UCSC Genes; Guo; lncRNAWiki; NONCODE	chr3	coding
TC1700012439.hg.1	-1.87537	0.0355449	54894	RNF43	ring finger protein 43	NM_001305544; NM_001305545; NM_017763; ENST00000407977; ENST00000577625; ENST00000577716; ENST00000580014; ENST00000581868; ENST00000582293; ENST00000583753; ENST00000584437; BC109028; OTTHUMT00000444711; OTTHUMT00000444712; OTTHUMT00000444713; OTTHUMT00000444714; OTTHUMT00000444715; OTTHUMT00000444716; OTTHUMT00000444717; OTTHUMT00000444718; CCDS11607.1; hsa_circ_0044775; hsa_circ_0044776; hsa_c…	RefSeq; ENSEMBL; GenBank; Havana transcript; ccdsGene; circbase; Ace View; UCSC Genes; lncRNAWiki; NONCODE	chr17	coding
TC1100011520.hg.1	-1.87369	0.000123888	440051	KRTAP5-11	keratin associated protein 5-11	NM_001005405; ENST00000398530; ENST00000526239; ENST00000616086; ENST00000617152; OTTHUMT00000127969; OTTHUMT00000394688; uc001oqu.3; CCDS41685.1; uc058evs.1; uc058evt.1; uc058evu.1; ENST00000502328; NONHSAT022693; OTTHUMT00000127967	RefSeq; ENSEMBL; Havana transcript; UCSC Genes; ccdsGene; lncRNAWiki; NONCODE	chr11	coding
TC1500007883.hg.1	-1.87317	0.230125	54939	COMMD4	COMM domain containing 4	NM_001284377; NM_001284378; NM_001284379; NM_017828; NR_104312; NR_104313; ENST00000267935; ENST00000338995; ENST00000480484; ENST00000561662; ENST00000562310; ENST00000562610; ENST00000562789; ENST00000563220; ENST00000564068; ENST00000564587; ENST00000564815; ENST00000565517; ENST00000565834; ENST00000566230; ENST00000566843; ENST00000567023; ENST00000567195; ENST00000567377; ENST00000567399; E…	RefSeq; ENSEMBL; GenBank; Havana transcript; ccdsGene; Ace View; circbase; UCSC Genes; lncRNAWiki; NONCODE	chr15	coding
TC0600007262.hg.1	-1.87286	0.604784	8350	HIST1H3A	histone cluster 1, H3a	NM_003529; ENST00000613854; BC066245; BC066246; BC066247; BC067490; BC067491; BC069303; OTTHUMT00000040080; CCDS4570.1; uc003nfp.2	RefSeq; ENSEMBL; GenBank; Havana transcript; ccdsGene; UCSC Genes	chr6	coding
TC0600011134.hg.1	-1.87235	0.0359659	8360	HIST1H4D	histone cluster 1, H4d	NM_003539; ENST00000614247; BC128104; BC143045; OTTHUMT00000040085; BC156842; CCDS4589.1; uc003ngu.4	RefSeq; ENSEMBL; GenBank; Havana transcript; ccdsGene; UCSC Genes	chr6	coding
TC0300013983.hg.1	-1.87188	0.430649	24142	NAT6	N-acetyltransferase 6 (GCN5-related)	NM_001200016; NM_001200018; NM_012191; ENST00000354862; ENST00000417393; ENST00000442620; ENST00000443094; ENST00000443842; ENST00000450489; ENST00000452674; BC004483; OTTHUMT00000346680; OTTHUMT00000346681; OTTHUMT00000346683; OTTHUMT00000346684; OTTHUMT00000346685; OTTHUMT00000346686; OTTHUMT00000346687; CCDS43095.1; CCDS56258.1; HYAL3andNAT6.mAug10; uc003czi.4; uc003czj.4; uc003czk.5; uc062kdj…	RefSeq; ENSEMBL; GenBank; Havana transcript; ccdsGene; Ace View; UCSC Genes	chr3	coding
TSUnmapped00000768.hg.1	-1.87176	0.0650332	2091	FBL	fibrillarin	ENST00000630901	ENSEMBL		coding
TC1800008988.hg.1	-1.87143	0.164071	220158	GTSCR1	Gilles de la Tourette syndrome chromosome region, candidate 1 (non-protein coding)	NM_001278515; OTTHUMT00000443342; uc060pzy.1; ENST00000582578; LN608668.1:1..470:ncRNA; TCONS_l2_00012130; TCONS_l2_00012131	RefSeq; Havana transcript; UCSC Genes; ENSEMBL; RNACentral; lncRNA Db	chr18	coding
TC1100006495.hg.1	-1.8712	0.124172	7106	TSPAN4	tetraspanin 4	NM_001025234; NM_001025235; NM_001025236; NM_001025237; NM_001025238; NM_001025239; NM_003271; ENST00000346501; ENST00000397396; ENST00000397397; ENST00000397404; ENST00000397406; ENST00000397408; ENST00000397411; ENST00000409531; ENST00000409543; ENST00000464987; ENST00000468468; ENST00000494815; ENST00000524895; ENST00000525201; ENST00000525334; ENST00000526055; ENST00000527644; ENST00000529566…	RefSeq; ENSEMBL; GenBank; UCSC Genes; ccdsGene; circbase; Ace View; lncRNAWiki; NONCODE; Havana transcript	chr11	coding
TC1800006655.hg.1	-1.87114	0.0319296	84203	TXNDC2	thioredoxin domain containing 2 (spermatozoa)	NM_001098529; NM_032243; ENST00000306084; ENST00000357775; ENST00000426718; ENST00000536353; ENST00000584255; ENST00000611534; BC050132; CCDS11846.1; CCDS42414.1; uc002koh.5; uc002koi.5; uc060nhy.1; uc060nhz.1; uc060nia.1; uc060nib.1; OTTHUMT00000254487; OTTHUMT00000254488; OTTHUMT00000442546; OTTHUMT00000442547; OTTHUMT00000443566	RefSeq; ENSEMBL; GenBank; ccdsGene; UCSC Genes; Havana transcript	chr18	coding
TC0800009464.hg.1	-1.86614	0.0702623	414325; 55894	DEFB103A; DEFB103B	defensin, beta 103A; defensin, beta 103B	NM_001081551; NM_018661; ENST00000318124; OTTHUMT00000290103; BC111596; CCDS34810.1; DEFB103B.bAug10; uc003wrf.4	RefSeq; ENSEMBL; Havana transcript; GenBank; ccdsGene; Ace View; UCSC Genes	chr8	coding
TC1700006653.hg.1	-1.86548	0.186466	2811	GP1BA	glycoprotein Ib (platelet), alpha polypeptide	NM_000173; ENST00000329125; ENST00000611961; BC027955; OTTHUMT00000439889; uc021tnz.1; CCDS54068.1; GP1BA.aAug10; uc059zxf.1	RefSeq; ENSEMBL; GenBank; Havana transcript; UCSC Genes; ccdsGene; Ace View	chr17	coding
TC0700008857.hg.1	-1.8652	0.00164699	29969	MDFIC	MyoD family inhibitor domain containing	NM_001166345; NM_001166346; NM_199072; ENST00000257724; ENST00000393486; ENST00000423503; ENST00000427207; ENST00000431629; ENST00000448022; ENST00000498196; ENST00000614186; OTTHUMT00000059968; OTTHUMT00000140188; OTTHUMT00000140189; OTTHUMT00000140190; OTTHUMT00000140191; OTTHUMT00000351028; OTTHUMT00000366397; CCDS34737.1; CCDS55155.1; hsa_circ_0007720; hsa_circ_0081996; uc003vhf.5; uc064hfl.1…	RefSeq; ENSEMBL; Havana transcript; ccdsGene; circbase; UCSC Genes; Guo	chr7	coding
TC0200009619.hg.1	-1.86297	0.128045	130576	LYPD6B	LY6/PLAUR domain containing 6B	NM_177964; ENST00000280115; ENST00000409029; ENST00000409642; ENST00000409876; ENST00000437627; ENST00000442722; ENST00000450639; ENST00000473800; ENST00000473975; ENST00000480545; ENST00000498249; BC018203; BC040176; OTTHUMT00000332297; OTTHUMT00000332298; OTTHUMT00000332299; OTTHUMT00000332300; OTTHUMT00000332301; OTTHUMT00000332302; OTTHUMT00000332353; OTTHUMT00000332354; OTTHUMT00000333201; O…	RefSeq; ENSEMBL; GenBank; Havana transcript; ccdsGene; Ace View; UCSC Genes; lncRNAWiki; NONCODE	chr2	coding
TC0100010269.hg.1	-1.86166	0.176565	56833	SLAMF8	SLAM family member 8	NM_020125; ENST00000289707; ENST00000368104; ENST00000471286; ENST00000497141; BC109194; OTTHUMT00000085983; OTTHUMT00000085984; OTTHUMT00000085985; OTTHUMT00000085986; CCDS1188.1; uc001fue.5; uc057mhj.1; uc057mhk.1; uc057mhl.1	RefSeq; ENSEMBL; GenBank; Havana transcript; ccdsGene; UCSC Genes	chr1	coding
TC0200013605.hg.1	-1.86149	0.271605	254773	LYG2	lysozyme G-like 2	NM_175735; ENST00000333017; ENST00000409238; ENST00000409679; ENST00000423306; ENST00000423800; ENST00000626374; BC100882; BC100883; BC100884; BC100885; OTTHUMT00000253131; OTTHUMT00000330306; OTTHUMT00000330307; OTTHUMT00000330308; CCDS2042.1; LYG2.aAug10; LYG2.dAug10; uc002szw.2; uc002szx.2; uc010fip.2; uc061mgj.1; uc061mgk.1; uc061mgl.1	RefSeq; ENSEMBL; GenBank; Havana transcript; ccdsGene; Ace View; UCSC Genes	chr2	coding
TC0600011140.hg.1	-1.86031	0.00709949	8968	HIST1H3F	histone cluster 1, H3f	NM_021018; ENST00000618052; BC067492; BC069818; BC096131; OTTHUMT00000040098; CCDS4600.1; HIST1H3F.aAug10-unspliced; uc003nhg.2	RefSeq; ENSEMBL; GenBank; Havana transcript; ccdsGene; Ace View; UCSC Genes	chr6	coding
TSUnmapped00000741.hg.1	-1.85851	0.0585889	339327	ZNF546	zinc finger protein 546	ENST00000631242	ENSEMBL		coding
TC0600011145.hg.1	-1.85823	0.169289	8365	HIST1H4H	histone cluster 1, H4h	NM_003543; ENST00000377727; BC120939; OTTHUMT00000040119; CCDS4604.1; uc003nhm.3	RefSeq; ENSEMBL; GenBank; Havana transcript; ccdsGene; UCSC Genes	chr6	coding
TC1000008005.hg.1	-1.85614	0.010436	90550	MCU	mitochondrial calcium uniporter	NM_001270679; NM_001270680; NM_138357; NR_073062; ENST00000357157; ENST00000373053; ENST00000483185; ENST00000536019; ENST00000603118; ENST00000603649; ENST00000604152; ENST00000604372; ENST00000604679; ENST00000605416; ENST00000605597; BC034235; OTTHUMT00000048593; OTTHUMT00000048594; OTTHUMT00000048595; OTTHUMT00000468490; OTTHUMT00000468491; OTTHUMT00000468492; OTTHUMT00000468493; OTTHUMT00000…	RefSeq; ENSEMBL; GenBank; Havana transcript; UCSC Genes; ccdsGene; circbase; Guo; lncRNAWiki; NONCODE	chr10	coding
TC0X00010459.hg.1	-1.85452	0.000588836	79710	MORC4	MORC family CW-type zinc finger 4	NM_001085354; NM_024657; ENST00000255495; ENST00000355610; ENST00000478924; ENST00000604604; OTTHUMT00000057816; OTTHUMT00000057817; OTTHUMT00000378619; OTTHUMT00000469675; uc004emu.4; BC172575; CCDS14525.2; CCDS48146.1; hsa_circ_0091283; hsa_circ_0091284; uc004emv.5; uc065aog.1; uc065aok.1; BC009313	RefSeq; ENSEMBL; Havana transcript; UCSC Genes; GenBank; ccdsGene; circbase	chrX	coding
TC1200010774.hg.1	-1.85389	0.432889	51350	KRT76	keratin 76, type II	NM_015848; ENST00000332411; OTTHUMT00000405928; uc001sax.3; BC167839; CCDS8838.1	RefSeq; ENSEMBL; Havana transcript; UCSC Genes; GenBank; ccdsGene	chr12	coding
TC1600010181.hg.1	-1.85357	0.0121199	81831	NETO2	neuropilin (NRP) and tolloid (TLL)-like 2	NM_001201477; NM_018092; ENST00000303155; ENST00000562435; ENST00000562559; ENST00000563078; ENST00000564667; OTTHUMT00000256766; OTTHUMT00000430390; OTTHUMT00000430391; OTTHUMT00000430392; OTTHUMT00000430393; BC156955; CCDS10727.1; CCDS58460.1; hsa_circ_0003520; hsa_circ_0039233; hsa_circ_0039234; hsa_circ_0039235; hsa_circ_0039236; hsa_circ_0039237; hsa_circ_0039238; hsa_circ_0039239; ITFG1andN…	RefSeq; ENSEMBL; Havana transcript; GenBank; ccdsGene; circbase; Ace View; UCSC Genes; Guo; NONCODE	chr16	coding
TC0400008213.hg.1	-1.8535	0.104141	5910	RAP1GDS1	RAP1, GTP-GDP dissociation stimulator 1	NM_001100426; NM_001100427; NM_001100428; NM_001100429; NM_001100430; NM_021159; ENST00000264572; ENST00000339360; ENST00000380158; ENST00000408900; ENST00000408927; ENST00000453712; ENST00000503667; ENST00000503745; ENST00000505378; ENST00000507303; ENST00000508213; ENST00000508490; ENST00000509011; ENST00000509501; ENST00000510870; ENST00000511212; ENST00000511379; ENST00000512857; ENST00000514…	RefSeq; ENSEMBL; GenBank; Havana transcript; ccdsGene; circbase; UCSC Genes; lncRNAWiki; NONCODE	chr4	coding
TC0600014188.hg.1	-1.85341	0.0170238	9749	PHACTR2	phosphatase and actin regulator 2	NM_001100164; NM_001100165; NM_001100166; NM_014721; ENST00000305766; ENST00000367582; ENST00000367584; ENST00000397980; ENST00000402863; ENST00000420771; ENST00000427704; ENST00000440869; ENST00000451827; ENST00000536245; ENST00000542769; ENST00000545919; BC150630; BC152416; OTTHUMT00000042528; OTTHUMT00000042529; OTTHUMT00000042530; OTTHUMT00000042531; OTTHUMT00000396907; OTTHUMT00000396908; OT…	RefSeq; ENSEMBL; GenBank; Havana transcript; UCSC Genes; ccdsGene; circbase; Ace View; lncRNAWiki; NONCODE	chr6	coding
TC1600008661.hg.1	-1.85298	0.088601	83716	CRISPLD2	cysteine-rich secretory protein LCCL domain containing 2	NM_031476; ENST00000262424; ENST00000563066; ENST00000564567; ENST00000565561; ENST00000566151; ENST00000566165; ENST00000566431; ENST00000566789; ENST00000567845; ENST00000569090; ENST00000569262; BC063012; OTTHUMT00000269086; OTTHUMT00000433734; OTTHUMT00000433737; OTTHUMT00000433738; OTTHUMT00000433739; OTTHUMT00000433740; OTTHUMT00000433741; OTTHUMT00000433742; OTTHUMT00000433743; OTTHUMT0000…	RefSeq; ENSEMBL; GenBank; Havana transcript; ccdsGene; Ace View; circbase; UCSC Genes	chr16	coding
TC0700006445.hg.1	-1.8502	0.0106641	56975	FAM20C	family with sequence similarity 20, member C	ENST00000313766; ENST00000471328; ENST00000477004; ENST00000512382; ENST00000515795; BC040074; OTTHUMT00000322476; OTTHUMT00000322477; OTTHUMT00000322478; OTTHUMT00000394479; OTTHUMT00000394480; NM_020223_3; CCDS47522.1; FAM20C.mAug10; hsa_circ_0079034; hsa_circ_0079035; hsa_circ_0079036; uc003sip.4; uc064asn.1; uc064aso.1; uc064asp.1; uc064asq.1; NONHSAT118619; NONHSAT118621	ENSEMBL; GenBank; Havana transcript; RefSeq; ccdsGene; Ace View; circbase; UCSC Genes; lncRNAWiki; NONCODE	chr7	coding
TC0400012366.hg.1	-1.84968	0.298694	55601	DDX60	DEAD (Asp-Glu-Ala-Asp) box polypeptide 60	NM_017631; ENST00000393743; ENST00000505393; ENST00000507815; ENST00000511317; ENST00000513997; ENST00000514995; BC038115; OTTHUMT00000364622; OTTHUMT00000364623; OTTHUMT00000364624; OTTHUMT00000364625; OTTHUMT00000364626; OTTHUMT00000364627; CCDS34097.1; DDX60.dAug10; DDX60.eAug10; hsa_circ_0004303; hsa_circ_0005462; hsa_circ_0071393; hsa_circ_0071394; uc003irp.4; uc063avj.1; uc063avk.1; uc063av…	RefSeq; ENSEMBL; GenBank; Havana transcript; ccdsGene; Ace View; circbase; UCSC Genes; lncRNAWiki; NONCODE	chr4	coding
TC0900012292.hg.1	-1.84963	0.128315	389816	LRRC26	leucine rich repeat containing 26	NM_001013653; ENST00000371542; BC140911; OTTHUMT00000055307; CCDS35184.1; LRRC26.aAug10; uc004clp.4	RefSeq; ENSEMBL; GenBank; Havana transcript; ccdsGene; Ace View; UCSC Genes	chr9	coding
TC0300013532.hg.1	-1.84963	0.303104	257313	UTS2B	urotensin 2B	NM_198152; ENST00000340524; ENST00000425357; ENST00000427544; ENST00000432514; ENST00000440476; ENST00000446788; ENST00000463450; ENST00000464814; ENST00000490825; BC112166; OTTHUMT00000343353; OTTHUMT00000343354; OTTHUMT00000343355; OTTHUMT00000343356; OTTHUMT00000343357; OTTHUMT00000343358; OTTHUMT00000343359; OTTHUMT00000343360; OTTHUMT00000343361; CCDS3300.1; uc003fsu.4; uc062rkp.1; uc062rkq.…	RefSeq; ENSEMBL; GenBank; Havana transcript; ccdsGene; UCSC Genes; Ace View; lncRNAWiki; NONCODE	chr3	coding
TC0300012818.hg.1	-1.8491	0.344603	285313	IGSF10	immunoglobulin superfamily, member 10	NM_001178145; NM_001178146; NM_178822; ENST00000282466; ENST00000489791; ENST00000493841; ENST00000495443; ENST00000497472; OTTHUMT00000357782; OTTHUMT00000357783; OTTHUMT00000357784; OTTHUMT00000357785; OTTHUMT00000357786; CCDS3160.1; IGSF10.bAug10; IGSF10.cAug10; IGSF10.eAug10; uc011bod.3; uc062pbz.1; uc062pca.1; uc062pcb.1; uc062pcc.1; NONHSAT092723	RefSeq; ENSEMBL; Havana transcript; ccdsGene; Ace View; UCSC Genes; lncRNAWiki; NONCODE	chr3	coding
TC0600011123.hg.1	-1.84899	0.0777089	8366	HIST1H4B	histone cluster 1, H4b	NM_003544; ENST00000377745; BC069467; OTTHUMT00000040079; CCDS4572.1; uc003nfr.4	RefSeq; ENSEMBL; GenBank; Havana transcript; ccdsGene; UCSC Genes	chr6	coding
TC1400008116.hg.1	-1.8484	0.0118617	51527	GSKIP	GSK3B interacting protein	NM_001271904; NM_001271905; NM_001271906; NM_016472; ENST00000438650; ENST00000553699; ENST00000554182; ENST00000555088; ENST00000555181; ENST00000555757; ENST00000556095; BC004818; OTTHUMT00000413334; OTTHUMT00000413335; OTTHUMT00000413336; OTTHUMT00000413337; OTTHUMT00000413338; OTTHUMT00000413339; C14orf129.bAug10; CCDS32153.1; uc001yfj.6; uc001yfl.5; uc031qqe.2; uc031qqf.2; uc059ews.1; uc059e…	RefSeq; ENSEMBL; GenBank; Havana transcript; Ace View; ccdsGene; UCSC Genes; lncRNAWiki; NONCODE	chr14	coding
TSUnmapped00000127.hg.1	-1.84746	0.0214218	56992	KIF15	kinesin family member 15	ENST00000625939	ENSEMBL		coding
TC1600008218.hg.1	-1.84679	0.285966	3038	HAS3	hyaluronan synthase 3	NM_001199280; NM_005329; NM_138612; ENST00000219322; ENST00000306560; ENST00000566118; ENST00000568321; ENST00000569188; BC021853; OTTHUMT00000268898; OTTHUMT00000268899; OTTHUMT00000433333; OTTHUMT00000433334; OTTHUMT00000433335; CCDS10870.1; CCDS10871.1; HAS3.aAug10; hsa_circ_0040009; uc002ewk.4; uc002ewl.4; uc010cfh.4; uc010vlk.2; uc059wiy.1; NONHSAT143314; NONHSAT143315; NONHSAT143316	RefSeq; ENSEMBL; GenBank; Havana transcript; ccdsGene; Ace View; circbase; UCSC Genes; lncRNAWiki; NONCODE	chr16	coding
TC0600011235.hg.1	-1.84647	0.0104031	8336; 8356	HIST1H2AM; HIST1H3J	histone cluster 1, H2am; histone cluster 1, H3j	NM_003514; NM_003535; ENST00000359303; ENST00000359611; ENST00000479986; OTTHUMT00000040162; OTTHUMT00000043453; OTTHUMT00000331293; CCDS4638.1; CCDS4639.1; uc003nka.4; uc003nkb.2; uc063mkh.1	RefSeq; ENSEMBL; Havana transcript; ccdsGene; UCSC Genes	chr6	coding
TC1900011632.hg.1	-1.84561	0.0303303	84878	ZBTB45	zinc finger and BTB domain containing 45	NM_032792; ENST00000354590; ENST00000594051; ENST00000596739; ENST00000600130; ENST00000600990; BC024738; OTTHUMT00000467066; OTTHUMT00000467067; OTTHUMT00000467069; OTTHUMT00000467070; OTTHUMT00000467071; uc002qtd.3; CCDS12984.1; uc002qtf.4; uc061dtt.1; uc061dtu.1; uc061dtv.1; NONHSAT068450	RefSeq; ENSEMBL; GenBank; Havana transcript; UCSC Genes; ccdsGene; lncRNAWiki; NONCODE	chr19	coding
TC0100013802.hg.1	-1.84554	0.0437039	51440	HPCAL4	hippocalcin like 4	NM_001282396; NM_001282397; NM_016257; ENST00000372844; ENST00000612703; ENST00000617690; BC030827; OTTHUMT00000025640; CCDS441.1; CCDS72761.1; uc001cdr.5; uc010oix.4; uc031tya.2	RefSeq; ENSEMBL; GenBank; Havana transcript; ccdsGene; UCSC Genes	chr1	coding
TC0500009027.hg.1	-1.84523	0.0240386	117156	SCGB3A2	secretoglobin, family 3A, member 2	NM_054023; ENST00000296694; ENST00000504320; ENST00000507160; ENST00000514688; BC024232; OTTHUMT00000251939; OTTHUMT00000373316; OTTHUMT00000373317; OTTHUMT00000373318; CCDS4287.1; SCGB3A2.eAug10; uc003lot.3; uc063ikh.1; uc063iki.1; uc063ikj.1; NONHSAT104431; NONHSAT104432	RefSeq; ENSEMBL; GenBank; Havana transcript; ccdsGene; Ace View; UCSC Genes; lncRNAWiki; NONCODE	chr5	coding
TC0100011573.hg.1	-1.84503	0.224484	56950	SMYD2	SET and MYND domain containing 2	NM_020197; ENST00000366957; ENST00000416415; ENST00000460580; ENST00000471645; ENST00000484459; ENST00000491455; BC049367; BC098133; BC098276; BC098305; BC098335; OTTHUMT00000089998; OTTHUMT00000089999; OTTHUMT00000090000; OTTHUMT00000090001; OTTHUMT00000090002; OTTHUMT00000318393; CCDS31022.1; hsa_circ_0016437; hsa_circ_0016438; hsa_circ_0016439; SMYD2.cAug10; uc057pjv.1; uc057pjw.1; uc057pjx.1;…	RefSeq; ENSEMBL; GenBank; Havana transcript; ccdsGene; circbase; Ace View; UCSC Genes	chr1	coding
TC0700011318.hg.1	-1.845	0.0437173	2086; 51351	ERV3-1; ZNF117	endogenous retrovirus group 3, member 1; zinc finger protein 117	NM_001007253; NM_015852; ENST00000282869; ENST00000394323; ENST00000487644; ENST00000528878; ENST00000535538; ENST00000610793; ENST00000620222; OTTHUMT00000344863; OTTHUMT00000344864; OTTHUMT00000381468; OTTHUMT00000383882; OTTHUMT00000399083; BC172492; CCDS43593.1; CCDS47595.1; uc003ttr.3; uc003tts.3; uc011kdr.3; uc064dyc.1; uc064dyd.1; uc064dye.1; uc064dyf.1; NONHSAT121061; NONHSAT121062; NONHS…	RefSeq; ENSEMBL; Havana transcript; GenBank; ccdsGene; UCSC Genes; lncRNAWiki; NONCODE	chr7	coding
TC0900007865.hg.1	-1.8449	0.0219057	79048	SECISBP2	SECIS binding protein 2	NM_001282688; NM_001282689; NM_001282690; NM_024077; ENST00000339901; ENST00000375807; ENST00000425851; ENST00000440898; ENST00000470305; ENST00000477484; ENST00000496597; ENST00000498819; ENST00000534113; BC036109; OTTHUMT00000052990; OTTHUMT00000052991; OTTHUMT00000052992; OTTHUMT00000143493; OTTHUMT00000143494; OTTHUMT00000143495; OTTHUMT00000143636; OTTHUMT00000143637; CCDS65076.1; CCDS65077.…	RefSeq; ENSEMBL; GenBank; Havana transcript; ccdsGene; circbase; Ace View; UCSC Genes; lncRNAWiki; NONCODE	chr9	coding
TC1400007165.hg.1	-1.84403	0.0125282	5732	PTGER2	prostaglandin E receptor 2	NM_000956; ENST00000245457; ENST00000557436; BC093927; BC093929; OTTHUMT00000276890; OTTHUMT00000411615; CCDS9708.1; PTGER2.bAug10; uc001wzr.4; uc059bns.1	RefSeq; ENSEMBL; GenBank; Havana transcript; ccdsGene; Ace View; UCSC Genes	chr14	coding
TC0200010374.hg.1	-1.84354	0.116538	92935	MARS2	methionyl-tRNA synthetase 2, mitochondrial	NM_138395; ENST00000282276; BC126294; OTTHUMT00000335477; CCDS33358.1; uc002uuq.4	RefSeq; ENSEMBL; GenBank; Havana transcript; ccdsGene; UCSC Genes	chr2	coding
TC2200009233.hg.1	-1.8429	0.047982	135	ADORA2A	adenosine A2a receptor	NM_000675; NM_001278497; NM_001278498; NM_001278499; NM_001278500; NR_103543; NR_103544; ENST00000337539; ENST00000424232; ENST00000436735; ENST00000439591; ENST00000444262; ENST00000464977; ENST00000467385; ENST00000472248; ENST00000486108; ENST00000486351; ENST00000496258; ENST00000496497; ENST00000610595; ENST00000611543; ENST00000618076; BC013780; OTTHUMT00000319971; OTTHUMT00000319972; OTTHU…	RefSeq; ENSEMBL; GenBank; Havana transcript; ccdsGene; circbase; UCSC Genes; lncRNAWiki; NONCODE	chr22	coding
TC0200012159.hg.1	-1.84277	0.0121503	92291	CAPN13	calpain 13	NM_144575; ENST00000295055; ENST00000450650; ENST00000458085; ENST00000465450; ENST00000465960; ENST00000485248; ENST00000490786; BC117345; BC117347; OTTHUMT00000325101; OTTHUMT00000325103; OTTHUMT00000325264; OTTHUMT00000325265; OTTHUMT00000325266; OTTHUMT00000325267; OTTHUMT00000325268; CCDS46252.1; uc061hvu.1; uc061hvv.1; uc061hvw.1; uc061hvx.1; uc061hvy.1; uc061hvz.1; uc061hwa.1; NONHSAT069918	RefSeq; ENSEMBL; GenBank; Havana transcript; ccdsGene; UCSC Genes; lncRNAWiki; NONCODE	chr2	coding
TC2200009366.hg.1	-1.84213	0.00705281	386593	CHKB-CPT1B	CHKB-CPT1B readthrough (NMD candidate)	NR_027928; BC131570; OTTHUMT00000268188; OTTHUMT00000317601; OTTHUMT00000388890; uc062fni.1; uc062fnj.1; uc062fnu.1; ENST00000452668; ENST00000453634; ENST00000492556; NONHSAT087508	RefSeq; GenBank; Havana transcript; UCSC Genes; ENSEMBL; lncRNAWiki; NONCODE	chr22	ncrna
TC0500009072.hg.1	-1.84186	0.00488492	133522	PPARGC1B	peroxisome proliferator-activated receptor gamma, coactivator 1 beta	NM_001172698; NM_001172699; NM_133263; ENST00000309241; ENST00000360453; ENST00000394320; ENST00000403750; ENST00000434684; ENST00000461780; ENST00000492495; BC132971; BC132973; BC144251; OTTHUMT00000252334; OTTHUMT00000319316; OTTHUMT00000319317; OTTHUMT00000319318; OTTHUMT00000319319; OTTHUMT00000319320; OTTHUMT00000319322; CCDS4298.1; CCDS54933.1; CCDS54934.1; hsa_circ_0074489; hsa_circ_007449…	RefSeq; ENSEMBL; GenBank; Havana transcript; ccdsGene; circbase; UCSC Genes; Guo; lncRNAWiki; NONCODE	chr5	coding
TC0900009779.hg.1	-1.84183	0.123504	203228	C9orf72	chromosome 9 open reading frame 72	NM_001256054; NM_018325; NM_145005; ENST00000379995; ENST00000379997; ENST00000380003; ENST00000461679; ENST00000488117; ENST00000619707; BC068445; OTTHUMT00000051969; OTTHUMT00000051970; OTTHUMT00000051971; OTTHUMT00000051972; OTTHUMT00000051973; CCDS6522.1; CCDS6523.1; hsa_circ_0086606; uc003zqq.4; uc003zqr.2; uc022bfa.2; uc064sml.1; uc064smm.1; uc064smn.1; NONHSAT130618	RefSeq; ENSEMBL; GenBank; Havana transcript; ccdsGene; circbase; UCSC Genes; lncRNAWiki; NONCODE	chr9	coding
TC2000009090.hg.1	-1.84178	0.288536		DHX35	Memczak2013 ANTISENSE, coding, INTERNAL, intronic best transcript NM_021931	hsa_circ_0001157	circbase	chr20	ncrna
TC0600007282.hg.1	-1.84126	0.00755055	8343	HIST1H2BF	histone cluster 1, H2bf	NM_003522; ENST00000356530; BC096120; BC096123; OTTHUMT00000040108; CCDS4592.1; uc003ngx.4	RefSeq; ENSEMBL; GenBank; Havana transcript; ccdsGene; UCSC Genes	chr6	coding
TC0700009256.hg.1	-1.84065	0.101695	647087	C7orf73	chromosome 7 open reading frame 73	NM_001130929; ENST00000422968; ENST00000507606; ENST00000509448; ENST00000515197; OTTHUMT00000340356; OTTHUMT00000366971; OTTHUMT00000366972; OTTHUMT00000367013; CCDS55168.1; uc003vsy.4; uc003vsz.5; uc064ihs.1; uc064iht.1; NONHSAT123522; NONHSAT123523; NONHSAT123524	RefSeq; ENSEMBL; Havana transcript; ccdsGene; UCSC Genes; lncRNAWiki; NONCODE	chr7	coding
TC0300013862.hg.1	-1.83962	0.0515133	152405	C3orf30	chromosome 3 open reading frame 30	NM_152539; ENST00000295622; ENST00000460150; ENST00000473121; ENST00000492792; ENST00000494105; BC130475; BC144197; OTTHUMT00000354838; OTTHUMT00000354839; OTTHUMT00000354840; OTTHUMT00000354841; OTTHUMT00000354842; uc003ecb.1; C3orf30andUPK1B.bAug10; CCDS2984.1; uc062mst.1; uc062msu.1; uc062msv.1; uc062msw.1	RefSeq; ENSEMBL; GenBank; Havana transcript; UCSC Genes; Ace View; ccdsGene	chr3	coding
TC0200010255.hg.1	-1.83954	0.108738	5378	PMS1	PMS1 homolog 1, mismatch repair system component	NM_000534; NM_001128143; NM_001128144; NM_001289408; NM_001289409; NR_110332; ENST00000342075; ENST00000374826; ENST00000409593; ENST00000409823; ENST00000409985; ENST00000418224; ENST00000420421; ENST00000421722; ENST00000424059; ENST00000424307; ENST00000424766; ENST00000432292; ENST00000441310; ENST00000446877; ENST00000447232; ENST00000447734; ENST00000450931; ENST00000452382; ENST00000483293…	RefSeq; ENSEMBL; GenBank; ccdsGene; circbase; Ace View; UCSC Genes; Guo; NONCODE; lncRNAWiki; Havana transcript	chr2	coding
TC1700012052.hg.1	-1.83943	0.00135445	71	ACTG1	actin gamma 1	NM_001199954; NM_001614; NR_037688; ENST00000331925; ENST00000570382; ENST00000571691; ENST00000571721; ENST00000572105; ENST00000573283; ENST00000574671; ENST00000575087; ENST00000575659; ENST00000575842; ENST00000575994; ENST00000576209; ENST00000576214; ENST00000576544; ENST00000576917; ENST00000615544; BC000292; BC001920; BC007442; BC009848; BC010999; BC012050; BC015005; BC015695; BC015779; B…	RefSeq; ENSEMBL; GenBank; Havana transcript; Ace View; ccdsGene; circbase; UCSC Genes; lncRNAWiki; NONCODE	chr17	coding
TC1100011184.hg.1	-1.83828	0.0259223		SF1	Memczak2013 ALT_ACCEPTOR, ALT_DONOR, coding, INTERNAL, intronic best transcript NM_201998	hsa_circ_0000321	circbase	chr11	ncrna
TC2200008000.hg.1	-1.83827	0.223428		TXNRD2	Transcript Identified by AceView, Entrez Gene ID(s) 10587	TXNRD2.pAug10-unspliced	Ace View	chr22	ncrna
TC1700009949.hg.1	-1.83799	0.040389	6720	SREBF1	sterol regulatory element binding transcription factor 1	NM_001005291; NM_004176; ENST00000261646; ENST00000355815; ENST00000395751; ENST00000395756; ENST00000395757; ENST00000423161; ENST00000447641; ENST00000469356; ENST00000470247; ENST00000471445; ENST00000476994; ENST00000478616; ENST00000485080; ENST00000486311; ENST00000487401; ENST00000490796; ENST00000577897; ENST00000578469; ENST00000580540; ENST00000581707; ENST00000583080; ENST00000583732; …	RefSeq; ENSEMBL; GenBank; Havana transcript; ccdsGene; Ace View; UCSC Genes; lncRNAWiki; NONCODE	chr17	coding
TC1400007321.hg.1	-1.83736	0.577023		DACT1	Transcript Identified by AceView, Entrez Gene ID(s) 51339	DACT1.fAug10-unspliced	Ace View	chr14	ncrna
TC1400010777.hg.1	-1.8373	0.021112	123036	TC2N	tandem C2 domains, nuclear	NM_001128595; NM_001128596; NM_001289134; NM_152332; ENST00000340892; ENST00000360594; ENST00000435962; ENST00000554424; ENST00000555302; ENST00000556018; ENST00000556590; BC040503; OTTHUMT00000411778; OTTHUMT00000411779; OTTHUMT00000411780; OTTHUMT00000411781; OTTHUMT00000411782; OTTHUMT00000411783; OTTHUMT00000411784; CCDS73679.1; CCDS9897.1; hsa_circ_0032969; hsa_circ_0032970; uc001xzt.6; uc00…	RefSeq; ENSEMBL; GenBank; Havana transcript; ccdsGene; circbase; UCSC Genes; Guo; lncRNAWiki; NONCODE	chr14	coding
TC0900012214.hg.1	-1.83714	0.237189	3446	IFNA10	interferon, alpha 10	NM_002171; ENST00000357374; BC069409; BC103972; BC103973; OTTHUMT00000051887; uc003zoq.1; CCDS6499.1; IFNA10.aAug10-unspliced	RefSeq; ENSEMBL; GenBank; Havana transcript; UCSC Genes; ccdsGene; Ace View	chr9	coding
TC2000007016.hg.1	-1.83624	0.0303157	9837	GINS1	GINS complex subunit 1 (Psf1 homolog)	NM_021067; ENST00000262460; ENST00000473460; ENST00000481735; ENST00000484893; BC012542; OTTHUMT00000078433; OTTHUMT00000078434; OTTHUMT00000078435; OTTHUMT00000078436; CCDS33451.1; GINS1.mAug10; hsa_circ_0002441; hsa_circ_0004483; hsa_circ_0005930; hsa_circ_0059673; hsa_circ_0059674; hsa_circ_0059675; hsa_circ_0059676; hsa_circ_0059677; uc002wuv.2; uc061vxx.1; uc061vxy.1; uc061vxz.1; chr20_25394…	RefSeq; ENSEMBL; GenBank; Havana transcript; ccdsGene; Ace View; circbase; UCSC Genes; Guo; lncRNAWiki; NONCODE	chr20	coding
TC1700007561.hg.1	-1.83597	0.437889	6357	CCL13	chemokine (C-C motif) ligand 13	NM_005408; ENST00000225844; ENST00000577681; BC008621; OTTHUMT00000256389; OTTHUMT00000447906; uc002hic.3; CCDS11281.1; uc060dyk.1	RefSeq; ENSEMBL; GenBank; Havana transcript; UCSC Genes; ccdsGene	chr17	coding
TC1900008141.hg.1	-1.83582	0.00988735	29785	CYP2S1	cytochrome P450, family 2, subfamily S, polypeptide 1	NM_030622; ENST00000310054; ENST00000593545; ENST00000593890; ENST00000595590; ENST00000597754; ENST00000600561; BC033691; OTTHUMT00000463287; OTTHUMT00000463288; OTTHUMT00000463290; OTTHUMT00000463291; OTTHUMT00000463645; OTTHUMT00000463646; CCDS12573.1; CYP2S1.eAug10; hsa_circ_0051151; hsa_circ_0051152; hsa_circ_0051153; hsa_circ_0051154; hsa_circ_0051155; uc002opw.4; uc060yyv.1; uc060yyw.1; uc…	RefSeq; ENSEMBL; GenBank; Havana transcript; ccdsGene; Ace View; circbase; UCSC Genes	chr19	coding
TC0100012490.hg.1	-1.83403	0.0135839	643988	C1orf233	chromosome 1 open reading frame 233	NM_001242659; ENST00000422725; OTTHUMT00000337408; CCDS55559.1; uc021oes.2; LN607841.1:1..2085:ncRNA	RefSeq; ENSEMBL; Havana transcript; ccdsGene; UCSC Genes; RNACentral	chr1	coding
TC0800008955.hg.1	-1.8337	0.0195505	8840	WISP1	WNT1 inducible signaling pathway protein 1	NM_001204869; NM_001204870; NM_003882; NM_080838; NR_037944; ENST00000220856; ENST00000250160; ENST00000377862; ENST00000517423; ENST00000519433; BC074840; BC074841; OTTHUMT00000378794; OTTHUMT00000378795; OTTHUMT00000378796; OTTHUMT00000378797; OTTHUMT00000378798; CCDS56555.1; CCDS56556.1; CCDS6371.1; CCDS6372.1; ENST00000602893.1; OTTHUMT00000468102; uc003yub.4; uc003yuc.4; uc010mec.4; uc010med…	RefSeq; ENSEMBL; GenBank; Havana transcript; ccdsGene; lncRNAWiki; UCSC Genes; Ace View; RNACentral; NONCODE	chr8	coding
TC0100014988.hg.1	-1.83276	0.000372092	2152	F3	coagulation factor III (thromboplastin, tissue factor)	NM_001178096; NM_001993; ENST00000334047; ENST00000370207; ENST00000478217; ENST00000480356; BC011029; OTTHUMT00000029593; OTTHUMT00000029594; OTTHUMT00000029595; OTTHUMT00000029596; CCDS53345.1; CCDS750.1; F3.aAug10; hsa_circ_0013239; hsa_circ_0013240; hsa_circ_0013241; hsa_circ_0013242; uc001dqr.4; uc001dqs.4; uc057ilq.1; uc057ilr.1; NONHSAT004593	RefSeq; ENSEMBL; GenBank; Havana transcript; ccdsGene; Ace View; circbase; UCSC Genes; lncRNAWiki; NONCODE	chr1	coding
TC0100009352.hg.1	-1.83274	0.0102188	284612	SYPL2	synaptophysin-like 2	NM_001040709; ENST00000369872; ENST00000475497; BC113102; BC113103; OTTHUMT00000030191; OTTHUMT00000030192; CCDS41365.1; uc001dxp.4; uc057iyz.1; NONHSAT005036	RefSeq; ENSEMBL; GenBank; Havana transcript; ccdsGene; UCSC Genes; lncRNAWiki; NONCODE	chr1	coding
TC1900010856.hg.1	-1.83201	0.100673	5329	PLAUR	plasminogen activator, urokinase receptor	NM_001005376; NM_001005377; NM_001301037; NM_002659; ENST00000221264; ENST00000339082; ENST00000340093; ENST00000593396; ENST00000593447; ENST00000593714; ENST00000593939; ENST00000594364; ENST00000595038; ENST00000597107; ENST00000598875; ENST00000599546; ENST00000599892; ENST00000601723; ENST00000601876; ENST00000602141; BC002788; OTTHUMT00000463568; OTTHUMT00000463569; OTTHUMT00000463570; OTTH…	RefSeq; ENSEMBL; GenBank; Havana transcript; ccdsGene; circbase; Ace View; UCSC Genes; lncRNAWiki; NONCODE	chr19	coding
TC1000010276.hg.1	-1.83185	0.022806		NRP1	Transcript Identified by AceView, Entrez Gene ID(s) 8829	NRP1.vdAug10-unspliced	Ace View	chr10	ncrna
TSUnmapped00000050.hg.1	-1.83168	0.642107	22877	MLXIP	MLX interacting protein	ENST00000625732	ENSEMBL		coding
TC0100018261.hg.1	-1.83141	0.0554048	2948	GSTM4	glutathione S-transferase mu 4	NM_000850; NM_147148; NR_024538; ENST00000326729; ENST00000369833; ENST00000369836; ENST00000461767; ENST00000464733; ENST00000478397; ENST00000479578; ENST00000485640; ENST00000493171; ENST00000493395; ENST00000495742; BC015513; BC108729; OTTHUMT00000032187; OTTHUMT00000032188; OTTHUMT00000032189; OTTHUMT00000032190; OTTHUMT00000032191; OTTHUMT00000032192; OTTHUMT00000032193; OTTHUMT00000032194;…	RefSeq; ENSEMBL; GenBank; Havana transcript; ccdsGene; circbase; UCSC Genes	chr1	coding
TC0300007645.hg.1	-1.83088	0.0673251	5793	PTPRG	protein tyrosine phosphatase, receptor type, G	NM_002841; ENST00000295874; ENST00000468576; ENST00000474889; ENST00000475012; ENST00000475527; ENST00000485215; ENST00000495879; ENST00000615556; ENST00000618938; BC140904; BC144110; OTTHUMT00000351674; OTTHUMT00000351675; OTTHUMT00000351676; OTTHUMT00000351677; OTTHUMT00000351678; OTTHUMT00000351679; OTTHUMT00000351680; CCDS2895.1; hsa_circ_0066402; hsa_circ_0066403; hsa_circ_0066404; hsa_circ_…	RefSeq; ENSEMBL; GenBank; Havana transcript; ccdsGene; circbase; Ace View; UCSC Genes; Guo; lncRNAWiki; NONCODE	chr3	coding
TC0200009982.hg.1	-1.82965	0.142606	11069	RAPGEF4	Rap guanine nucleotide exchange factor 4	NM_001100397; NM_001282899; NM_001282900; NM_001282901; NM_007023; ENST00000397081; ENST00000397085; ENST00000397087; ENST00000409036; ENST00000459852; ENST00000464976; ENST00000466030; ENST00000473003; ENST00000473043; ENST00000473182; ENST00000484331; ENST00000484645; ENST00000535187; ENST00000538974; ENST00000540783; BC024004; BC040183; OTTHUMT00000257864; OTTHUMT00000257865; OTTHUMT0000025786…	RefSeq; ENSEMBL; GenBank; Havana transcript; ccdsGene; circbase; UCSC Genes; lncRNAWiki; NONCODE	chr2	coding
TC1700008932.hg.1	-1.82954	0.0990995	353174	ZACN	zinc activated ligand-gated ion channel	NM_180990; ENST00000334586; ENST00000421794; ENST00000425015; ENST00000524242; ENST00000590045; ENST00000591500; BC110597; OTTHUMT00000347827; OTTHUMT00000347828; OTTHUMT00000347829; OTTHUMT00000379759; OTTHUMT00000449502; OTTHUMT00000449851; CCDS11740.2; uc002jqn.3; uc002jqo.3; uc060kha.1; uc060khb.1; uc060khc.1; uc060khd.1; ZACN.gAug10; NONHSAT055976; NONHSAT055977	RefSeq; ENSEMBL; GenBank; Havana transcript; ccdsGene; UCSC Genes; Ace View; lncRNAWiki; NONCODE	chr17	coding
TC0300011175.hg.1	-1.82644	0.00647642	55193	PBRM1	polybromo 1	NM_018313; ENST00000296302; ENST00000337303; ENST00000356770; ENST00000394830; ENST00000409057; ENST00000409114; ENST00000409767; ENST00000410007; ENST00000412587; ENST00000420148; ENST00000423351; ENST00000424867; ENST00000431678; ENST00000439181; ENST00000446103; ENST00000449505; ENST00000450271; ENST00000458294; ENST00000462207; ENST00000480064; BC115009; BC115011; BC129934; BC129935; OTTHUMT0…	RefSeq; ENSEMBL; GenBank; Havana transcript; ccdsGene; circbase; Ace View; UCSC Genes	chr3	coding
TC0800012085.hg.1	-1.8264	0.126123	57152	SLURP1	secreted LY6/PLAUR domain containing 1	NM_020427; ENST00000246515; BC069292; BC105133; BC105135; OTTHUMT00000379741; uc003ywy.3; CCDS6387.1	RefSeq; ENSEMBL; GenBank; Havana transcript; UCSC Genes; ccdsGene	chr8	coding
TC0200016018.hg.1	-1.82602	0.101444	4691	NCL	nucleolin	NM_005381; ENST00000322723; ENST00000356936; ENST00000417652; ENST00000436894; ENST00000453992; ENST00000454824; ENST00000461347; ENST00000466274; ENST00000484328; ENST00000494618; BC002343; BC006494; BC006516; OTTHUMT00000332731; OTTHUMT00000332732; OTTHUMT00000332739; OTTHUMT00000332740; OTTHUMT00000332741; OTTHUMT00000332742; OTTHUMT00000332743; OTTHUMT00000332744; OTTHUMT00000332745; OTTHUMT0…	RefSeq; ENSEMBL; GenBank; Havana transcript; ccdsGene; circbase; UCSC Genes; lncRNAWiki; NONCODE	chr2	coding
TC1100012285.hg.1	-1.82588	0.00510058	399948	COLCA1	colorectal cancer associated 1	NM_001302644; NM_001302645; NM_001302646; NM_001302647; NM_001302648; NM_207429; C11orf92.cAug10; OTTHUMT00000390999; OTTHUMT00000391000; OTTHUMT00000391001; uc001pld.4; uc001ple.5; uc058hds.1; uc058hdt.1; uc058hdu.1; ENST00000355430; ENST00000526150; ENST00000532918; ENST00000540738; ENST00000620864; LK938871.1:1..8098:ncRNA; LK938872.1:1..5442:ncRNA; LK938873.1:1..391:ncRNA; NONHSAT024094	RefSeq; Ace View; Havana transcript; UCSC Genes; ENSEMBL; RNACentral; lncRNAWiki; NONCODE	chr11	coding
TC0200011670.hg.1	-1.82564	0.316832		KIDINS220	Transcript Identified by AceView, Entrez Gene ID(s) 57498; 100216337	KIDINS220.nAug10-unspliced	Ace View	chr2	ncrna
TC1900007410.hg.1	-1.82555	0.418949	5976	UPF1	UPF1 regulator of nonsense transcripts homolog (yeast)	NM_001297549; NM_002911; ENST00000262803; ENST00000594243; ENST00000594504; ENST00000596842; ENST00000598209; ENST00000598471; ENST00000599848; ENST00000600012; ENST00000600310; ENST00000600689; ENST00000600868; ENST00000601689; ENST00000601981; BC039817; OTTHUMT00000464683; OTTHUMT00000464684; OTTHUMT00000464685; OTTHUMT00000464686; OTTHUMT00000464687; OTTHUMT00000464688; OTTHUMT00000464689; OTT…	RefSeq; ENSEMBL; GenBank; Havana transcript; ccdsGene; circbase; UCSC Genes; Ace View; lncRNAWiki; NONCODE	chr19	coding
TC0700013327.hg.1	-1.82538	0.104878	55501	CHST12	carbohydrate (chondroitin 4) sulfotransferase 12	NM_001243794; NM_001243795; NM_018641; BC002918; BC095492; OTTHUMT00000325030; CCDS5333.1; uc003smd.4; uc064bad.1; ENST00000432336; ENST00000618655	RefSeq; GenBank; Havana transcript; ccdsGene; UCSC Genes; ENSEMBL	chr7	coding
TC0600008931.hg.1	-1.8252	0.0203042	2898	GRIK2	glutamate receptor, ionotropic, kainate 2	NM_001166247; NM_021956; NM_175768; ENST00000318991; ENST00000358361; ENST00000369134; ENST00000369137; ENST00000369138; ENST00000413795; ENST00000421544; ENST00000436862; ENST00000455610; ENST00000487161; ENST00000487395; BC063814; OTTHUMT00000043718; OTTHUMT00000043719; OTTHUMT00000043720; OTTHUMT00000043721; OTTHUMT00000043722; OTTHUMT00000043723; OTTHUMT00000043724; OTTHUMT00000258911; uc021z…	RefSeq; ENSEMBL; GenBank; Havana transcript; UCSC Genes; ccdsGene; Ace View; circbase; lncRNAWiki; NONCODE	chr6	coding
TC1400007632.hg.1	-1.82475	0.315901	89932	PAPLN	papilin, proteoglycan-like sulfated glycoprotein	NM_173462; ENST00000216658; ENST00000340738; ENST00000554301; ENST00000554314; ENST00000554527; ENST00000555035; ENST00000555123; ENST00000555445; ENST00000555700; ENST00000557061; ENST00000559759; BC136623; OTTHUMT00000413179; OTTHUMT00000413180; OTTHUMT00000413181; OTTHUMT00000413182; OTTHUMT00000413183; OTTHUMT00000413186; OTTHUMT00000413225; OTTHUMT00000413380; OTTHUMT00000413381; OTTHUMT0000…	RefSeq; ENSEMBL; GenBank; Havana transcript; ccdsGene; circbase; Ace View; UCSC Genes; lncRNAWiki; NONCODE	chr14	coding
TC1200009199.hg.1	-1.82397	0.172157	79369	B3GNT4	UDP-GlcNAc:betaGal beta-1,3-N-acetylglucosaminyltransferase 4	NM_030765; ENST00000324189; ENST00000535274; ENST00000537991; ENST00000538257; ENST00000545141; ENST00000546192; BC031399; OTTHUMT00000401595; OTTHUMT00000401596; OTTHUMT00000401597; OTTHUMT00000401598; OTTHUMT00000401599; OTTHUMT00000401600; B3GNT4.bAug10; CCDS9227.1; uc001ubx.4; uc001uby.4; uc058uld.1; uc058ule.1; uc058ulf.1; uc058ulg.1; NONHSAT031494; NONHSAT031495	RefSeq; ENSEMBL; GenBank; Havana transcript; Ace View; ccdsGene; UCSC Genes; lncRNAWiki; NONCODE	chr12	coding
TC1300010036.hg.1	-1.82388	0.449509	646982	LINC00598	long intergenic non-protein coding RNA 598	NR_024505; NR_024506; NR_024507; ENST00000400430; ENST00000400431; ENST00000542632; ENST00000615137; ENST00000616706; uc001uxk.3; ENST00000400430.2; ENST00000400431.2; ENST00000542632.1; hsa_circ_0030040; hsa_circ_0030041; OTTHUMT00000044629; OTTHUMT00000044630; OTTHUMT00000474818; OTTHUMT00000474822; uc058wou.1; uc058wov.1; uc058wow.1; uc058wox.1; HG505558.1:1..702:ncRNA; HG505559.1:1..183:ncRNA…	RefSeq; ENSEMBL; UCSC Genes; lncRNAWiki; circbase; Havana transcript; RNACentral; NONCODE	chr13	ncrna
TC2200009197.hg.1	-1.82354	0.424946	439931	THAP7-AS1	THAP7 antisense RNA 1	NR_027051; NR_027052; ENST00000429962; ENST00000436079; ENST00000452284; ENST00000429962.1; ENST00000436079.1; ENST00000452284.1; OTTHUMT00000320384; OTTHUMT00000320385; OTTHUMT00000320386; uc002ztt.4; uc002ztv.4; uc062bxd.1; HG512038.1:1..1720:ncRNA; HG512039.1:1..1263:ncRNA; HG512040.1:1..2298:ncRNA; NONHSAT083615; NONHSAT083616; NONHSAT083617	RefSeq; ENSEMBL; lncRNAWiki; Havana transcript; UCSC Genes; RNACentral; NONCODE	chr22	ncrna
TC0600009343.hg.1	-1.82301	0.255581	154215	NKAIN2	Na+/K+ transporting ATPase interacting 2	NM_001040214; NM_001300737; NM_001300738; NM_001300740; NM_153355; ENST00000368416; ENST00000368417; ENST00000476571; ENST00000545433; ENST00000546092; BC035062; OTTHUMT00000042056; OTTHUMT00000042057; OTTHUMT00000042058; CCDS34526.1; uc003pzn.2; uc003pzo.4; uc063rby.1; uc063rca.1; uc063rcb.1; NONHSAT114775	RefSeq; ENSEMBL; GenBank; Havana transcript; ccdsGene; UCSC Genes; lncRNAWiki; NONCODE	chr6	coding
TC1900011958.hg.1	-1.82266	0.333066	2077	ERF	Ets2 repressor factor	NM_001301035; NM_001308402; NM_001312656; NM_006494; ENST00000222329; ENST00000440177; ENST00000593944; ENST00000595448; ENST00000595941; ENST00000596818; ENST00000598965; BC022231; OTTHUMT00000463684; OTTHUMT00000463685; OTTHUMT00000463687; OTTHUMT00000463688; OTTHUMT00000463689; OTTHUMT00000463690; OTTHUMT00000463691; CCDS12600.1; uc002ote.5; uc060zgc.1; uc060zgd.1; uc060zge.1; uc060zgf.1; uc06…	RefSeq; ENSEMBL; GenBank; Havana transcript; ccdsGene; UCSC Genes; lncRNAWiki; NONCODE	chr19	coding
TC0100007660.hg.1	-1.82237	0.574061	55116	TMEM39B	transmembrane protein 39B	NM_018056; ENST00000336294; ENST00000438825; ENST00000441402; ENST00000466321; ENST00000468135; ENST00000472503; ENST00000476968; ENST00000487305; ENST00000498613; OTTHUMT00000011489; OTTHUMT00000091374; OTTHUMT00000091375; OTTHUMT00000091376; OTTHUMT00000091377; OTTHUMT00000091378; OTTHUMT00000091379; OTTHUMT00000091380; OTTHUMT00000099435; CCDS351.2; hsa_circ_0003601; hsa_circ_0006349; hsa_circ…	RefSeq; ENSEMBL; Havana transcript; ccdsGene; circbase; UCSC Genes; Guo	chr1	coding
TC1600011383.hg.1	-1.82233	0.0264784	100862671; 10847	TMEM265; SRCAP	transmembrane protein 265; Snf2-related CREBBP activator protein	NM_001256829; NM_006662; ENST00000262518; ENST00000395059; ENST00000411466; ENST00000474008; ENST00000483083; ENST00000615541; OTTHUMT00000255523; OTTHUMT00000341713; OTTHUMT00000341714; OTTHUMT00000341716; OTTHUMT00000487823; BC172428; CCDS10689.2; CCDS73870.1; hsa_circ_0004236; hsa_circ_0006127; hsa_circ_0039072; hsa_circ_0039073; hsa_circ_0039074; hsa_circ_0039075; hsa_circ_0039076; hsa_circ_0…	RefSeq; ENSEMBL; Havana transcript; GenBank; ccdsGene; circbase; Ace View; UCSC Genes; Guo; lncRNAWiki; NONCODE	chr16	coding
TC1900010517.hg.1	-1.82176	0.0808513	147929	ZNF565	zinc finger protein 565	NM_001042474; NM_152477; ENST00000304116; ENST00000355114; ENST00000392173; ENST00000585994; ENST00000586648; ENST00000587803; ENST00000591473; BC068453; OTTHUMT00000451696; OTTHUMT00000451697; OTTHUMT00000451698; OTTHUMT00000451699; OTTHUMT00000451700; OTTHUMT00000451701; ENST00000363309; CCDS12491.1; hsa_circ_0050764; hsa_circ_0050765; uc002odn.4; uc002odo.5; uc060xny.1; uc060xnz.1; uc060xoa.1;…	RefSeq; ENSEMBL; GenBank; Havana transcript; ccdsGene; circbase; UCSC Genes; Ace View; lncRNAWiki; NONCODE	chr19	coding
TC2100007198.hg.1	-1.82167	0.0736889	25825	BACE2	beta-site APP-cleaving enzyme 2	NM_012105; NM_138991; NM_138992; ENST00000328735; ENST00000330333; ENST00000347667; ENST00000463674; ENST00000465326; ENST00000466122; ENST00000470864; ENST00000475618; ENST00000487994; ENST00000491838; BC014453; OTTHUMT00000195056; OTTHUMT00000195057; OTTHUMT00000195058; OTTHUMT00000195059; OTTHUMT00000195060; OTTHUMT00000195061; OTTHUMT00000195062; OTTHUMT00000195063; OTTHUMT00000195064; OTTHUM…	RefSeq; ENSEMBL; GenBank; Havana transcript; Ace View; ccdsGene; circbase; UCSC Genes; Guo; lncRNAWiki; NONCODE	chr21	coding
TC0200011148.hg.1	-1.82125	0.0518102	6694	SPP2	secreted phosphoprotein 2	NM_006944; ENST00000168148; ENST00000373368; ENST00000425558; ENST00000492481; BC069401; OTTHUMT00000131313; OTTHUMT00000131314; OTTHUMT00000131315; OTTHUMT00000329819; CCDS2511.1; SPP2.eAug10; uc002vvk.2; uc061twv.1; uc061tww.1; uc061twx.1; NONHSAT077524	RefSeq; ENSEMBL; GenBank; Havana transcript; ccdsGene; Ace View; UCSC Genes; lncRNAWiki; NONCODE	chr2	coding
TC0300007123.hg.1	-1.81754	0.0367331	253639	ZNF620	zinc finger protein 620	NM_001256167; NM_001256168; NM_175888; ENST00000314529; ENST00000418905; ENST00000420891; ENST00000433723; OTTHUMT00000342824; OTTHUMT00000342825; OTTHUMT00000342826; OTTHUMT00000342827; BC153008; CCDS33740.1; CCDS58825.1; uc003ckk.5; uc003ckl.5; uc062ilx.1; uc062ily.1	RefSeq; ENSEMBL; Havana transcript; GenBank; ccdsGene; UCSC Genes	chr3	coding
TC0700013439.hg.1	-1.81743	0.0439867	55973	BCAP29	B-cell receptor-associated protein 29	NM_001008405; NM_018844; NR_027830; ENST00000005259; ENST00000379117; ENST00000379119; ENST00000421217; ENST00000436699; ENST00000442065; ENST00000445771; ENST00000457837; ENST00000465919; ENST00000466094; ENST00000473124; ENST00000479917; ENST00000486326; ENST00000490060; ENST00000491150; ENST00000494086; BC008478; OTTHUMT00000337011; OTTHUMT00000337012; OTTHUMT00000337014; OTTHUMT00000337015; O…	RefSeq; ENSEMBL; GenBank; Havana transcript; UCSC Genes; Ace View; ccdsGene; circbase; lncRNAWiki; NONCODE	chr7	coding
TC0400012782.hg.1	-1.81742	0.0919137	57620	STIM2	stromal interaction molecule 2	NM_001169117; NM_001169118; NM_020860; ENST00000465503; ENST00000467011; ENST00000467087; ENST00000473519; ENST00000477474; ENST00000478049; ENST00000504511; BC136449; BC146661; BC152554; BC171766; OTTHUMT00000215063; OTTHUMT00000215064; OTTHUMT00000356861; OTTHUMT00000356862; OTTHUMT00000356863; OTTHUMT00000356864; OTTHUMT00000356869; CCDS3440.2; CCDS54751.1; CCDS54752.1; hsa_circ_0001399; hsa_c…	RefSeq; ENSEMBL; GenBank; Havana transcript; ccdsGene; circbase; Ace View; UCSC Genes; lncRNAWiki; NONCODE	chr4	coding
TC1500010867.hg.1	-1.81696	0.268924	101928527; 5873	PIGBOS1; RAB27A	PIGB opposite strand 1; RAB27A, member RAS oncogene family	NM_001308421; NM_001308422; NM_001308423; ENST00000436697; ENST00000561545; ENST00000565225; ENST00000567948; OTTHUMT00000419682; OTTHUMT00000419683; OTTHUMT00000419684; OTTHUMT00000419685; ENST00000436697.2; ENST00000565225.1; ENST00000567948.1; uc059jlk.1; uc059jll.1; uc059jlm.1; uc059jln.1; NONHSAT043986; NONHSAT043987; NONHSAT043988; NONHSAT043989	RefSeq; ENSEMBL; Havana transcript; lncRNAWiki; UCSC Genes; NONCODE	chr15	coding
TC1200007594.hg.1	-1.81364	0.33916	41	ASIC1	acid sensing ion channel 1	NM_001095; NM_001256830; NM_020039; NR_046389; ENST00000228468; ENST00000447966; ENST00000453327; ENST00000548350; ENST00000549792; ENST00000550558; ENST00000551199; ENST00000552438; ENST00000552633; BC133707; OTTHUMT00000406003; OTTHUMT00000406004; OTTHUMT00000406005; OTTHUMT00000406006; OTTHUMT00000406007; OTTHUMT00000406008; OTTHUMT00000407189; OTTHUMT00000407190; OTTHUMT00000407191; ACCN2.cAu…	RefSeq; ENSEMBL; GenBank; Havana transcript; Ace View; ccdsGene; circbase; UCSC Genes; lncRNAWiki; NONCODE	chr12	coding
TC2000009259.hg.1	-1.81287	0.0288547	57727	NCOA5	nuclear receptor coactivator 5	NM_020967; ENST00000290231; ENST00000372291; BC140836; BC151133; OTTHUMT00000079559; OTTHUMT00000079560; CCDS13392.1; hsa_circ_0060572; uc002xre.4; uc061xln.1	RefSeq; ENSEMBL; GenBank; Havana transcript; ccdsGene; circbase; UCSC Genes	chr20	coding
TC0700010934.hg.1	-1.81209	0.245834	94239	H2AFV	H2A histone family, member V	NM_012412; NM_138635; NM_201436; NM_201516; NM_201517; ENST00000222690; ENST00000308153; ENST00000349299; ENST00000350771; ENST00000381124; ENST00000437072; ENST00000446531; ENST00000521529; BC000098; BC004274; BC014885; BC070169; OTTHUMT00000251304; OTTHUMT00000251305; OTTHUMT00000251306; OTTHUMT00000251330; OTTHUMT00000341803; OTTHUMT00000341804; OTTHUMT00000376523; OTTHUMT00000376524; CCDS4758…	RefSeq; ENSEMBL; GenBank; Havana transcript; ccdsGene; Ace View; circbase; UCSC Genes	chr7	coding
TC1200012534.hg.1	-1.81184	0.168391		POLE	Transcript Identified by AceView, Entrez Gene ID(s) 5426	POLE.veAug10-unspliced	Ace View	chr12	ncrna
TC0100018499.hg.1	-1.81176	0.00201174	4582	MUC1	mucin 1, cell surface associated	NM_001018016; NM_001018017; NM_001044390; NM_001044391; NM_001044392; NM_001044393; NM_001204285; NM_001204286; NM_001204287; NM_001204288; NM_001204289; NM_001204290; NM_001204291; NM_001204292; NM_001204293; NM_001204294; NM_001204295; NM_001204296; NM_001204297; NM_002456; ENST00000337604; ENST00000338684; ENST00000342482; ENST00000343256; ENST00000368389; ENST00000368390; ENST00000368392; ENS…	RefSeq; ENSEMBL; GenBank; Havana transcript; ccdsGene; Ace View; UCSC Genes; lncRNAWiki; NONCODE	chr1	coding
TC0200009612.hg.1	-1.81163	0.0457436	26122	EPC2	enhancer of polycomb homolog 2 (Drosophila)	NM_015630; ENST00000258484; ENST00000397424; ENST00000409654; ENST00000449013; ENST00000457184; ENST00000491099; BC093818; BC093820; OTTHUMT00000332278; OTTHUMT00000332279; OTTHUMT00000332280; OTTHUMT00000332281; OTTHUMT00000332282; OTTHUMT00000332283; CCDS46422.1; hsa_circ_0001075; hsa_circ_0056680; hsa_circ_0056681; hsa_circ_0056682; hsa_circ_0056683; hsa_circ_0056684; hsa_circ_0056685; uc010zb…	RefSeq; ENSEMBL; GenBank; Havana transcript; ccdsGene; circbase; UCSC Genes	chr2	coding
TC0100008326.hg.1	-1.81051	0.0162419	348378	FAM159A	family with sequence similarity 159, member A	NM_001042693; ENST00000401050; ENST00000424164; ENST00000440303; ENST00000517870; OTTHUMT00000022931; OTTHUMT00000022932; OTTHUMT00000022933; OTTHUMT00000022934; CCDS41336.1; FAM159A.fAug10; uc001cuf.4; uc001cug.2; uc001cuh.4; uc057gpb.1; NONHSAT003252; NONHSAT003253	RefSeq; ENSEMBL; Havana transcript; ccdsGene; Ace View; UCSC Genes; lncRNAWiki; NONCODE	chr1	coding
TC0100006784.hg.1	-1.81026	0.00415121	5351	NFKB1	nuclear factor of kappa light polypeptide gene enhancer in B-cells 1	NM_001010866; NM_001130924; ENST00000340305; ENST00000340381; ENST00000416541; ENST00000508400; ENST00000510900; BC121187; BC137291; OTTHUMT00000127671; OTTHUMT00000127672; OTTHUMT00000127673; OTTHUMT00000367639; OTTHUMT00000367640; CCDS30579.1; CCDS44055.2; hsa_circ_0009650; TMEM201.bAug10; uc001apy.4; uc021ofy.2; uc057cau.1; uc057cav.1; uc057caw.1; NONHSAT000811	RefSeq; ENSEMBL; GenBank; Havana transcript; ccdsGene; circbase; Ace View; UCSC Genes; lncRNAWiki; NONCODE	chr1	coding
TC1100011011.hg.1	-1.81006	0.119056		PRPF19	Memczak2013 ALT_ACCEPTOR, ALT_DONOR, coding, INTERNAL, intronic best transcript NM_014502	hsa_circ_0000309	circbase	chr11	ncrna
TC0500006744.hg.1	-1.80745	0.919791	83853	ROPN1L	rhophilin associated tail protein 1-like	NM_001201466; NM_031916; ENST00000274134; ENST00000503804; ENST00000510520; ENST00000512022; ENST00000515762; BC014607; OTTHUMT00000206995; OTTHUMT00000367033; OTTHUMT00000367034; OTTHUMT00000367035; OTTHUMT00000367036; CCDS3879.1; uc003jex.5; uc021xwo.2; uc063cio.1; uc063cip.1; uc063ciq.1	RefSeq; ENSEMBL; GenBank; Havana transcript; ccdsGene; UCSC Genes	chr5	coding
TC1100011677.hg.1	-1.80655	0.173244	7481	WNT11	wingless-type MMTV integration site family, member 11	NM_004626; ENST00000322563; ENST00000529461; ENST00000532150; ENST00000621122; BC074790; BC074791; BC113386; BC113388; OTTHUMT00000383083; OTTHUMT00000383085; OTTHUMT00000383086; CCDS8242.1; uc001oxe.4; uc058fqb.1; uc058fqd.1; uc058fqe.1; NONHSAT023149	RefSeq; ENSEMBL; GenBank; Havana transcript; ccdsGene; UCSC Genes; lncRNAWiki; NONCODE	chr11	coding
TC1300007706.hg.1	-1.80631	0.584601	407975; 406952; 406953; 406979; 406980; 406982; 407048	MIR17HG; MIR17; MIR18A; MIR19A; MIR19B1; MIR20A; MIR92A1	miR-17-92 cluster host gene; microRNA 17; microRNA 18a; microRNA 19a; microRNA 19b-1; microRNA 20a; microRNA 92a-1	NR_027349; NR_027350; NR_029487; NR_029488; NR_029489; NR_029490; NR_029492; NR_029508; ENST00000362279; ENST00000384829; ENST00000384878; ENST00000385012; ENST00000385233; ENST00000400282; ENST00000581816; ENST00000582141; BC109082; ENST00000362279.1; ENST00000362310.2; ENST00000384829.1; ENST00000384878.1; ENST00000385012.1; ENST00000385233.2; ENST00000400282.2; ENST00000581816.1; ENST000005821…	RefSeq; ENSEMBL; GenBank; lncRNAWiki; circbase; Ace View; Havana transcript; UCSC Genes; RNACentral; NONCODE	chr13	ncrna
TC1200012016.hg.1	-1.80627	0.552941	6926	TBX3	T-box 3	NM_005996; NM_016569; ENST00000257566; ENST00000349155; ENST00000548503; ENST00000552054; ENST00000613550; BC025258; OTTHUMT00000404945; OTTHUMT00000404947; OTTHUMT00000404948; OTTHUMT00000404957; uc001tvu.1; CCDS9175.1; CCDS9176.1; hsa_circ_0028545; hsa_circ_0028546; hsa_circ_0028547; TBX3.bAug10; uc001tvt.2; uc058tqz.1; uc058tra.1; uc058trb.1; NONHSAT030888; NONHSAT030889	RefSeq; ENSEMBL; GenBank; Havana transcript; UCSC Genes; ccdsGene; circbase; Ace View; lncRNAWiki; NONCODE	chr12	coding
TC0600014254.hg.1	-1.80548	0.0928159	26531	OR11A1	olfactory receptor, family 11, subfamily A, member 1	ENST00000377147; ENST00000377148; ENST00000377149; BC131608; uc003nmg.3; NM_013937_6; CCDS34363.1; OR11A1andOR5V1.aAug10; uc010jrh.2; uc063mmy.1; NONHSAT108518; OTTHUMT00000076468; OTTHUMT00000193778	ENSEMBL; GenBank; UCSC Genes; RefSeq; ccdsGene; Ace View; lncRNAWiki; NONCODE; Havana transcript	chr6	coding
TC1900006856.hg.1	-1.80538	0.647364	10332	CLEC4M	C-type lectin domain family 4, member M	NM_001144904; NM_001144905; NM_001144906; NM_001144907; NM_001144908; NM_001144909; NM_001144910; NM_001144911; NM_014257; NR_026707; NR_026708; NR_026709; ENST00000248228; ENST00000327325; ENST00000334806; ENST00000359059; ENST00000394122; ENST00000595496; ENST00000595751; ENST00000596363; ENST00000596707; ENST00000597522; ENST00000598879; ENST00000599333; ENST00000601089; ENST00000602143; BC038…	RefSeq; ENSEMBL; GenBank; Havana transcript; UCSC Genes; ccdsGene; lncRNAWiki; NONCODE	chr19	coding
TC0100015478.hg.1	-1.80396	0.593621	343505	NBPF7	neuroblastoma breakpoint family, member 7	NM_001047980; OTTHUMT00000033686; BC156966; ENST00000445758	RefSeq; Havana transcript; GenBank; ENSEMBL	chr1	coding
TC1700007716.hg.1	-1.80276	0.0412223	4302	MLLT6	myeloid/lymphoid or mixed-lineage leukemia; translocated to, 6	ENST00000611305; ENST00000612066; ENST00000614769; ENST00000615441; ENST00000615741; ENST00000615858; ENST00000618652; ENST00000619356; ENST00000620482; ENST00000620609; ENST00000621332; OTTHUMT00000477431; OTTHUMT00000477432; OTTHUMT00000477433; OTTHUMT00000477434; OTTHUMT00000477435; OTTHUMT00000477436; OTTHUMT00000477438; OTTHUMT00000477439; OTTHUMT00000477440; OTTHUMT00000477441; OTTHUMT00000…	ENSEMBL; Havana transcript; RefSeq; ccdsGene; circbase; UCSC Genes; lncRNAWiki; NONCODE	chr17	coding
TC0700006610.hg.1	-1.80258	0.192128	9907	AP5Z1	adaptor-related protein complex 5, zeta 1 subunit	NM_014855; ENST00000348624; ENST00000469614; ENST00000477454; ENST00000477680; ENST00000490487; ENST00000491375; ENST00000496303; BC037399; OTTHUMT00000323771; OTTHUMT00000323772; OTTHUMT00000323773; OTTHUMT00000323774; OTTHUMT00000323775; OTTHUMT00000323777; OTTHUMT00000323778; CCDS47528.1; hsa_circ_0079230; hsa_circ_0079231; hsa_circ_0079232; uc003sne.4; uc010ksp.4; uc064bcn.1; uc064bco.1; uc06…	RefSeq; ENSEMBL; GenBank; Havana transcript; ccdsGene; circbase; UCSC Genes	chr7	coding
TC0100007315.hg.1	-1.8023	0.000389546	148898	ZNF436-AS1	ZNF436 antisense RNA 1	NR_033690; NR_033691; BC028411; BC054115; BC068594; ENST00000364535; C1orf213.eAug10; OTTHUMT00000008895; OTTHUMT00000008896; OTTHUMT00000008897; OTTHUMT00000381647; OTTHUMT00000381648; uc021oif.4; uc057dfe.1; uc057dff.1; uc057dfg.1; uc057dfh.1; uc057dfi.1; uc057dfj.1; ENST00000335648; ENST00000437367; ENST00000454117; ENST00000458053; ENST00000518600; ENST00000518821; LN607852.1:1..375:ncRNA; LN…	RefSeq; GenBank; ENSEMBL; Ace View; Havana transcript; UCSC Genes; RNACentral; lncRNAWiki; NONCODE	chr1	ncrna
TC0200007854.hg.1	-1.80203	0.356792	4211	MEIS1	Meis homeobox 1	NM_002398; ENST00000272369; ENST00000398506; ENST00000409517; ENST00000409622; ENST00000437869; ENST00000450027; ENST00000466811; ENST00000475239; ENST00000488550; ENST00000490726; ENST00000491706; ENST00000495021; ENST00000496248; ENST00000498705; ENST00000542964; ENST00000560281; ENST00000606455; BC043503; OTTHUMT00000319725; OTTHUMT00000319726; OTTHUMT00000319727; OTTHUMT00000319729; OTTHUMT00…	RefSeq; ENSEMBL; GenBank; Havana transcript; UCSC Genes; ccdsGene; circbase; Ace View; lncRNAWiki; NONCODE	chr2	coding
TC1900008015.hg.1	-1.80107	0.933944	399473	SPRED3	sprouty-related, EVH1 domain containing 3	NM_001042522; NR_073032; ENST00000338502; ENST00000586301; ENST00000586958; ENST00000587013; ENST00000587564; ENST00000587947; ENST00000590962; BC151136; OTTHUMT00000459212; OTTHUMT00000459214; OTTHUMT00000459215; OTTHUMT00000459216; OTTHUMT00000459217; OTTHUMT00000459218; OTTHUMT00000459219; CCDS42560.1; ENST00000588453.1; hsa_circ_0050824; hsa_circ_0050825; hsa_circ_0050826; SPRED3.cAug10; uc00…	RefSeq; ENSEMBL; GenBank; Havana transcript; ccdsGene; lncRNAWiki; circbase; Ace View; UCSC Genes; RNACentral; NONCODE	chr19	coding
TC1100013013.hg.1	-1.8	0.385153	245802	MS4A6E	membrane-spanning 4-domains, subfamily A, member 6E	NM_139249; ENST00000300182; ENST00000530509; BC069322; BC101783; OTTHUMT00000394296; OTTHUMT00000394298; CCDS7984.1; MS4A6EandMS4A7andMS4A14.viAug10; uc001npd.4; uc058btt.1	RefSeq; ENSEMBL; GenBank; Havana transcript; ccdsGene; Ace View; UCSC Genes	chr11	coding
TSUnmapped00000289.hg.1	-1.79987	0.729305	6130	RPL7A	ribosomal protein L7a	ENST00000628986	ENSEMBL		coding
TC1200006515.hg.1	-1.79941	0.373247	7004	TEAD4	TEA domain family member 4	NM_003213; NM_201441; NM_201443; ENST00000358409; ENST00000359864; ENST00000397122; ENST00000443986; ENST00000536826; ENST00000540314; ENST00000543035; ENST00000544666; BC015497; OTTHUMT00000398472; OTTHUMT00000398473; OTTHUMT00000398474; OTTHUMT00000398475; OTTHUMT00000398476; OTTHUMT00000398477; OTTHUMT00000398478; OTTHUMT00000398479; CCDS31729.1; CCDS31730.1; CCDS41737.1; hsa_circ_0007035; hsa…	RefSeq; ENSEMBL; GenBank; Havana transcript; ccdsGene; circbase; Ace View; UCSC Genes	chr12	coding
TC1700009544.hg.1	-1.7994	0.321127	388324	INCA1	inhibitor of CDK, cyclin A1 interacting protein 1	NM_001167985; NM_001167986; NM_001167987; NM_213726; ENST00000355025; ENST00000574617; ENST00000575780; ENST00000576820; BC119781; BC122873; OTTHUMT00000438883; OTTHUMT00000438884; OTTHUMT00000438885; OTTHUMT00000438886; uc002gal.3; uc002gam.3; CCDS11064.1; CCDS54074.1; INCA1.bAug10; INCA1.dAug10; uc059zzl.1; uc059zzm.1	RefSeq; ENSEMBL; GenBank; Havana transcript; UCSC Genes; ccdsGene; Ace View	chr17	coding
TC1900009562.hg.1	-1.79848	0.455125	125962	OR7G1	olfactory receptor, family 7, subfamily G, member 1	NM_001005192; ENST00000541538; OTTHUMT00000397912; uc021uoi.1; CCDS32898.2	RefSeq; ENSEMBL; Havana transcript; UCSC Genes; ccdsGene	chr19	coding
TC1000008047.hg.1	-1.79845	0.428692	118487	CHCHD1	coiled-coil-helix-coiled-coil-helix domain containing 1	NM_203298; ENST00000372833; ENST00000372837; BC015387; BC020852; OTTHUMT00000048676; OTTHUMT00000048677; CCDS7334.1; hsa_circ_0018862; uc001jvb.3; uc001jvc.5	RefSeq; ENSEMBL; GenBank; Havana transcript; ccdsGene; circbase; UCSC Genes	chr10	coding
TC0100006806.hg.1	-1.79765	0.00225662	93190	MTOR	mechanistic target of rapamycin (serine/threonine kinase)	NM_001105562; NM_006048; ENST00000253251; ENST00000343090; ENST00000377153; ENST00000462658; ENST00000465408; ENST00000466379; ENST00000470736; ENST00000475795; ENST00000487244; ENST00000488228; BC093696; OTTHUMT00000005016; OTTHUMT00000005017; OTTHUMT00000005018; OTTHUMT00000005019; OTTHUMT00000005020; OTTHUMT00000005022; OTTHUMT00000005023; OTTHUMT00000005024; OTTHUMT00000005025; OTTHUMT0000000…	RefSeq; ENSEMBL; GenBank; Havana transcript; ccdsGene; circbase; UCSC Genes; Guo; lncRNAWiki; NONCODE	chr1	coding
TC0100009020.hg.1	-1.79704	0.30843	8317	CDC7	cell division cycle 7	NM_001134419; NM_001134420; NM_003503; ENST00000234626; ENST00000426137; ENST00000428239; ENST00000486509; ENST00000497611; BC110526; BC110527; BC111044; OTTHUMT00000027928; OTTHUMT00000027929; OTTHUMT00000027930; OTTHUMT00000027931; uc009wdc.3; CCDS734.1; hsa_circ_0013126; hsa_circ_0013127; hsa_circ_0013128; uc001doe.4; uc057igf.1; uc057igg.1; uc057igh.1; NONHSAT004436	RefSeq; ENSEMBL; GenBank; Havana transcript; UCSC Genes; ccdsGene; circbase; lncRNAWiki; NONCODE	chr1	coding
TC0600011466.hg.1	-1.79696	0.26917	221527	ZBTB12	zinc finger and BTB domain containing 12	NM_181842; ENST00000375527; BC043609; OTTHUMT00000076315; CCDS4727.1; uc003nyd.2	RefSeq; ENSEMBL; GenBank; Havana transcript; ccdsGene; UCSC Genes	chr6	coding
TC0500006435.hg.1	-1.79686	0.0935872	153478	PLEKHG4B	pleckstrin homology domain containing, family G (with RhoGef domain) member 4B	NM_052909; ENST00000283426; ENST00000502646; ENST00000504041; OTTHUMT00000365359; OTTHUMT00000365360; OTTHUMT00000365361; BC172524; CCDS34124.1; hsa_circ_0071622; PLEKHG4B.aAug10; uc003jak.3; uc063buo.1; uc063buq.1	RefSeq; ENSEMBL; Havana transcript; GenBank; ccdsGene; circbase; Ace View; UCSC Genes	chr5	coding
TC1200012571.hg.1	-1.79679	0.114897	55846	ITFG2	integrin alpha FG-GAP repeat containing 2	NM_018463; NR_130744; BC006552; BC013399; OTTHUMT00000253091; OTTHUMT00000398183; OTTHUMT00000398184; OTTHUMT00000398185; OTTHUMT00000398186; OTTHUMT00000398187; OTTHUMT00000398188; OTTHUMT00000398189; OTTHUMT00000398190; OTTHUMT00000398191; CCDS8513.1; hsa_circ_0000374; hsa_circ_0002009; hsa_circ_0025019; hsa_circ_0025020; hsa_circ_0025021; hsa_circ_0025022; hsa_circ_0025023; hsa_circ_0025024; h…	RefSeq; GenBank; Havana transcript; ccdsGene; circbase; Ace View; UCSC Genes; ENSEMBL; Guo	chr12	coding
TC0400012809.hg.1	-1.79606	0.0407321	10879	SMR3B	submaxillary gland androgen regulated protein 3B	NM_006685; ENST00000304915; ENST00000504825; ENST00000508027; ENST00000614072; BC015327; BC094707; OTTHUMT00000251552; OTTHUMT00000362613; OTTHUMT00000364117; uc003hfh.3; CCDS3540.1; SMR3AandSMR3B.eAug10; uc062xco.1; uc062xcp.1; uc062xcq.1; NONHSAT096790	RefSeq; ENSEMBL; GenBank; Havana transcript; UCSC Genes; ccdsGene; Ace View; lncRNAWiki; NONCODE	chr4	coding
TC1400010623.hg.1	-1.79502	0.105538	100529261	CHURC1-FNTB	CHURC1-FNTB readthrough	NM_001202558; NM_001202559; ENST00000549987; ENST00000551823; ENST00000552941; ENST00000553743; OTTHUMT00000408067; OTTHUMT00000408068; OTTHUMT00000408069; OTTHUMT00000414296; uc059cky.1; uc059ckz.1; uc059clb.1; uc059clc.1	RefSeq; ENSEMBL; Havana transcript; UCSC Genes	chr14	coding
TC0200011195.hg.1	-1.79462	0.0575881		AGAP1; noygloy; torkeybo	Jeck2013 ALT_ACCEPTOR, ALT_DONOR, coding, INTERNAL, intronic best transcript NM_001037131; Transcript Identified by AceView	hsa_circ_0006177; noygloy.aAug10-unspliced; torkeybo.aAug10-unspliced; chr2_236494368_236503689	circbase; Ace View; Guo	chr2	ncrna
TC1000010135.hg.1	-1.79426	0.699251	55130	ARMC4	armadillo repeat containing 4	NM_001290020; NM_001290021; NM_018076; ENST00000305242; ENST00000434029; ENST00000467083; ENST00000480504; ENST00000481659; ENST00000486279; BC140846; OTTHUMT00000047339; OTTHUMT00000047340; OTTHUMT00000047341; OTTHUMT00000047342; OTTHUMT00000047343; OTTHUMT00000047344; uc001itz.3; CCDS7157.1; hsa_circ_0018045; hsa_circ_0018046; uc057skp.1; uc057skq.1; uc057skr.1; uc057sks.1; uc057skt.1; NONHSAT0…	RefSeq; ENSEMBL; GenBank; Havana transcript; UCSC Genes; ccdsGene; circbase; lncRNAWiki; NONCODE	chr10	coding
TC1400009776.hg.1	-1.7942	0.0210177	58157	NGB	neuroglobin	NM_021257; ENST00000298352; BC032509; OTTHUMT00000414194; CCDS9856.1; uc001xtg.2	RefSeq; ENSEMBL; GenBank; Havana transcript; ccdsGene; UCSC Genes	chr14	coding
TC1900011235.hg.1	-1.79339	0.143799	43849	KLK12	kallikrein related peptidase 12	NM_019598; NM_145894; NM_145895; ENST00000250351; ENST00000319590; ENST00000525263; ENST00000526824; ENST00000529888; ENST00000530943; ENST00000531374; BC035385; BC136341; OTTHUMT00000386288; OTTHUMT00000386290; OTTHUMT00000386291; OTTHUMT00000386292; OTTHUMT00000386293; OTTHUMT00000398364; uc002pvg.1; uc002pvi.1; CCDS12820.1; CCDS12821.1; CCDS54298.1; KLK12.aAug10; KLK12.bAug10; KLK12.cAug10; KL…	RefSeq; ENSEMBL; GenBank; Havana transcript; UCSC Genes; ccdsGene; Ace View	chr19	coding
TC2000007486.hg.1	-1.79293	0.0323125	11317	RBPJL	recombination signal binding protein for immunoglobulin kappa J region-like	NM_001281448; NM_001281449; NM_014276; ENST00000343694; ENST00000372741; ENST00000372743; ENST00000464504; ENST00000622729; OTTHUMT00000080389; OTTHUMT00000080390; OTTHUMT00000080391; OTTHUMT00000080392; OTTHUMT00000473986; BC156875; CCDS13349.1; CCDS63283.1; CCDS63284.1; RBPJL.aAug10; RBPJL.bAug10; uc002xns.5; uc002xnt.5; uc032pkw.2; uc061xhg.1; uc061xhh.1	RefSeq; ENSEMBL; Havana transcript; GenBank; ccdsGene; Ace View; UCSC Genes	chr20	coding
TC0600007477.hg.1	-1.79125	0.115205	4340	MOG	myelin oligodendrocyte glycoprotein	NM_001008228; NM_001008229; NM_002433; NM_206814; ENST00000376888; ENST00000376889; ENST00000376891; ENST00000376894; ENST00000376898; ENST00000376903; ENST00000376917; ENST00000396701; ENST00000396704; ENST00000416766; ENST00000431798; ENST00000469353; ENST00000469603; ENST00000476244; ENST00000483013; ENST00000485211; ENST00000485885; ENST00000490427; ENST00000494692; BC035938; OTTHUMT000000761…	RefSeq; ENSEMBL; GenBank; Havana transcript; UCSC Genes; ccdsGene; Ace View; lncRNAWiki; NONCODE	chr6	coding
TC0Y00006642.hg.1	-1.79043	0.110289	9087	TMSB4Y	thymosin beta 4, Y-linked	NM_004202; ENST00000284856; BC119763; BC119764; OTTHUMT00000088534; CCDS14786.1; uc004ftb.4	RefSeq; ENSEMBL; GenBank; Havana transcript; ccdsGene; UCSC Genes	chrY	coding
TC0700013341.hg.1	-1.78976	0.292219	1124	CHN2	chimerin 2	OTTHUMT00000327520; OTTHUMT00000446435; OTTHUMT00000446437; OTTHUMT00000470465; NR_120523; uc064ckf.1; uc064ckh.1; uc064cki.1; uc064ckj.1; ENST00000443025; ENST00000582692; ENST00000588769; ENST00000606897; NONHSAT119780; NONHSAT119782; NONHSAT119783	Havana transcript; RefSeq; UCSC Genes; ENSEMBL; lncRNAWiki; NONCODE	chr7	coding
TC1800008891.hg.1	-1.78905	0.693491	596	BCL2	B-cell CLL/lymphoma 2	NM_000633; NM_000657; ENST00000333681; ENST00000398117; ENST00000589955; ENST00000590515; BC027258; OTTHUMT00000256199; OTTHUMT00000450052; OTTHUMT00000450053; OTTHUMT00000451065; BCL2.dAug10; CCDS11981.1; CCDS45882.1; uc002lit.2; uc002liu.2; uc060pur.1; uc060puu.1; NONHSAT059654	RefSeq; ENSEMBL; GenBank; Havana transcript; Ace View; ccdsGene; UCSC Genes; lncRNAWiki; NONCODE	chr18	coding
TC0700012159.hg.1	-1.78904	0.0719931	54517	PUS7	pseudouridylate synthase 7 (putative)	NM_019042; ENST00000356362; ENST00000469408; ENST00000478208; ENST00000481939; ENST00000482157; ENST00000487277; BC011396; OTTHUMT00000348680; OTTHUMT00000348681; OTTHUMT00000348682; OTTHUMT00000348683; OTTHUMT00000348684; OTTHUMT00000348685; CCDS34725.1; hsa_circ_0003331; hsa_circ_0005705; hsa_circ_0006521; hsa_circ_0007459; hsa_circ_0008628; hsa_circ_0081834; hsa_circ_0081835; hsa_circ_0081836;…	RefSeq; ENSEMBL; GenBank; Havana transcript; ccdsGene; circbase; UCSC Genes; Guo; lncRNAWiki; NONCODE	chr7	coding
TC1400010733.hg.1	-1.78764	0.176709	253970	SFTA3	surfactant associated 3	NM_001101341; ENST00000418548; ENST00000518002; ENST00000518446; ENST00000518529; ENST00000518987; ENST00000519052; ENST00000521114; ENST00000521380; ENST00000524122; OTTHUMT00000376216; OTTHUMT00000376217; OTTHUMT00000376218; OTTHUMT00000376219; OTTHUMT00000376220; OTTHUMT00000376221; OTTHUMT00000376222; OTTHUMT00000376223; OTTHUMT00000376224; CCDS45097.1; NKX2-1andSFTA3.lAug10; NKX2-1andSFTA3.n…	RefSeq; ENSEMBL; Havana transcript; ccdsGene; Ace View; UCSC Genes; lncRNAWiki; NONCODE	chr14	coding
TC1800007849.hg.1	-1.78755	0.086836	9984	THOC1	THO complex 1	NM_005131; ENST00000261600; ENST00000577429; ENST00000577552; ENST00000578224; ENST00000578529; ENST00000579232; ENST00000579891; ENST00000580038; ENST00000580544; ENST00000580870; ENST00000581116; ENST00000581269; ENST00000581576; ENST00000582313; ENST00000583228; ENST00000584470; ENST00000584642; ENST00000585307; ENST00000616322; ENST00000621904; ENST00000631280; BC010381; OTTHUMT00000440348; O…	RefSeq; ENSEMBL; GenBank; Havana transcript; ccdsGene; circbase; Ace View; UCSC Genes; lncRNAWiki; NONCODE	chr18	coding
TC1600011552.hg.1	-1.78554	0.205667	1506	CTRL	chymotrypsin-like	NM_001907; ENST00000571044; ENST00000571605; ENST00000572144; ENST00000573845; ENST00000574481; ENST00000575302; ENST00000576408; ENST00000576915; BC063475; OTTHUMT00000268886; OTTHUMT00000437314; OTTHUMT00000437315; OTTHUMT00000437316; OTTHUMT00000437317; OTTHUMT00000437729; OTTHUMT00000437730; OTTHUMT00000437731; CCDS10852.1; PSMB10andCTRL.fAug10; PSMB10andCTRL.gAug10; uc002euw.4; uc059wan.1; u…	RefSeq; ENSEMBL; GenBank; Havana transcript; ccdsGene; Ace View; UCSC Genes; lncRNAWiki; NONCODE	chr16	coding
TC0800009071.hg.1	-1.78515	0.0180194	54108	CHRAC1	chromatin accessibility complex 1	NM_017444; NR_023360; NR_040712; ENST00000220913; ENST00000518971; ENST00000519533; ENST00000519618; ENST00000523569; BC015891; OTTHUMT00000377816; OTTHUMT00000377817; OTTHUMT00000377818; OTTHUMT00000377819; OTTHUMT00000377828; CCDS6379.1; hsa_circ_0085708; uc003yvl.4; uc064qpy.1; uc064qpz.1; uc064qqa.1; uc064qqb.1; NONHSAT129369	RefSeq; ENSEMBL; GenBank; Havana transcript; ccdsGene; circbase; UCSC Genes; lncRNAWiki; NONCODE	chr8	coding
TC1900006991.hg.1	-1.78498	0.0799466	57153	SLC44A2	solute carrier family 44 (choline transporter), member 2	NM_001145056; NM_020428; ENST00000335757; ENST00000407327; ENST00000586078; ENST00000586549; ENST00000588214; ENST00000588393; ENST00000588409; ENST00000588465; ENST00000588688; ENST00000589561; ENST00000590382; ENST00000590475; ENST00000590857; ENST00000591194; ENST00000592293; BC040556; OTTHUMT00000452042; OTTHUMT00000452043; OTTHUMT00000452044; OTTHUMT00000452045; OTTHUMT00000452046; OTTHUMT00…	RefSeq; ENSEMBL; GenBank; Havana transcript; ccdsGene; circbase; Ace View; UCSC Genes; lncRNAWiki; NONCODE	chr19	coding
TC1500010749.hg.1	-1.78464	0.163394	145773	FAM81A	family with sequence similarity 81, member A	NM_152450; ENST00000288228; ENST00000557895; ENST00000557914; ENST00000558513; ENST00000558900; ENST00000559628; ENST00000560022; ENST00000560074; ENST00000560087; ENST00000560118; ENST00000560123; ENST00000560474; ENST00000561361; BC022537; OTTHUMT00000415876; OTTHUMT00000415877; OTTHUMT00000415878; OTTHUMT00000415879; OTTHUMT00000415880; OTTHUMT00000415881; OTTHUMT00000415882; OTTHUMT0000041588…	RefSeq; ENSEMBL; GenBank; Havana transcript; ccdsGene; Ace View; UCSC Genes; Guo; lncRNAWiki; NONCODE	chr15	coding
TC1700008768.hg.1	-1.78426	0.0943107	3773	KCNJ16	potassium channel, inwardly rectifying subfamily J, member 16	NM_001270422; NM_001291622; NM_001291623; NM_001291624; NM_001291625; NM_018658; NM_170741; NM_170742; ENST00000283936; ENST00000392670; ENST00000392671; ENST00000585558; ENST00000586462; ENST00000587698; ENST00000587892; ENST00000588112; ENST00000589377; ENST00000591891; ENST00000615244; BC033038; OTTHUMT00000450877; OTTHUMT00000450878; OTTHUMT00000450880; OTTHUMT00000450883; OTTHUMT00000450884;…	RefSeq; ENSEMBL; GenBank; Havana transcript; ccdsGene; UCSC Genes; lncRNAWiki; NONCODE	chr17	coding
TC1900008432.hg.1	-1.78406	0.0423262	30846	EHD2	EH domain containing 2	NM_014601; ENST00000263277; ENST00000538399; ENST00000540884; ENST00000596225; ENST00000602215; BC014445; OTTHUMT00000465851; OTTHUMT00000465853; OTTHUMT00000465856; OTTHUMT00000465857; OTTHUMT00000465858; CCDS12704.1; EHD2.cAug10; EHD2.dAug10; hsa_circ_0002530; hsa_circ_0003146; hsa_circ_0004242; hsa_circ_0051695; hsa_circ_0051696; hsa_circ_0051697; hsa_circ_0051698; hsa_circ_0051699; hsa_circ_0…	RefSeq; ENSEMBL; GenBank; Havana transcript; ccdsGene; Ace View; circbase; UCSC Genes; lncRNAWiki; NONCODE	chr19	coding
TC0100012849.hg.1	-1.78398	0.0995143	54897	CASZ1	castor zinc finger 1	NM_001079843; NM_017766; ENST00000344008; ENST00000377022; ENST00000447850; ENST00000472814; ENST00000478524; ENST00000478728; ENST00000490176; ENST00000492173; ENST00000496432; BC051883; OTTHUMT00000005671; OTTHUMT00000005672; OTTHUMT00000005673; OTTHUMT00000005674; OTTHUMT00000005675; OTTHUMT00000005676; OTTHUMT00000005677; OTTHUMT00000005678; OTTHUMT00000366770; CCDS120.2; CCDS41246.1; hsa_cir…	RefSeq; ENSEMBL; GenBank; Havana transcript; ccdsGene; circbase; UCSC Genes; lncRNAWiki; NONCODE	chr1	coding
TC0400011486.hg.1	-1.7835	0.204982	80319	CXXC4	CXXC finger protein 4	NM_025212; ENST00000394767; ENST00000466963; ENST00000515509; BC119751; BC119752; OTTHUMT00000253799; OTTHUMT00000253800; OTTHUMT00000361422; CCDS3665.2; uc003hxf.3; uc010ilo.5; uc062yrp.1; NONHSAT097649; NONHSAT097650	RefSeq; ENSEMBL; GenBank; Havana transcript; ccdsGene; UCSC Genes; lncRNAWiki; NONCODE	chr4	coding
TC0600011185.hg.1	-1.78298	0.0108941	85236	HIST1H2BK	histone cluster 1, H2bk	NM_001312653; NM_080593; ENST00000356950; BC000893; BC051872; BC064959; BC108737; OTTHUMT00000040141; CCDS4621.1; hsa_circ_0001592; hsa_circ_0001593; hsa_circ_0075900; hsa_circ_0075901; uc063mja.1	RefSeq; ENSEMBL; GenBank; Havana transcript; ccdsGene; circbase; UCSC Genes	chr6	coding
TC0500008146.hg.1	-1.7826	0.335832	831	CAST	calpastatin	ENST00000509602; OTTHUMT00000471055; uc063foi.1; lnc-CAST-1:1; NONHSAT102894; TCONS_00009466	ENSEMBL; Havana transcript; UCSC Genes; lncRNAWiki; NONCODE; lncRNA Db	chr5	coding
TSUnmapped00000585.hg.1	-1.78217	0.0100602		LRIG1		ENST00000631537	ENSEMBL		ncrna
TC0Y00007113.hg.1	-1.78212	0.134835	353515; 9082	XKRY2; XKRY	X-linked Kx blood group related, Y-linked 2; X-linked Kx blood group related, Y-linked	NM_001002906; NM_004677; BC132883; BC132885; BC132901; BC132903; BC148772; BC153173; XKRY.aAug10-unspliced; ENST00000510392; ENST00000624960; OTTHUMT00000099665; OTTHUMT00000479362	RefSeq; GenBank; Ace View; ENSEMBL; Havana transcript	chrY	coding
TC0100018432.hg.1	-1.78162	0.02463	6421	SFPQ	splicing factor proline/glutamine-rich	NM_005066; ENST00000357214; BC051192; OTTHUMT00000011984; CCDS388.1; hsa_circ_0000050; hsa_circ_0011528; hsa_circ_0011529; hsa_circ_0011530; hsa_circ_0011531; hsa_circ_0011532; hsa_circ_0011533; uc001bys.4	RefSeq; ENSEMBL; GenBank; Havana transcript; ccdsGene; circbase; UCSC Genes	chr1	coding
TC0400011756.hg.1	-1.78148	0.295731	59067	IL21	interleukin 21	NM_001207006; NM_021803; ENST00000264497; ENST00000611104; BC066258; BC066259; BC066260; BC066261; BC066262; BC069124; OTTHUMT00000256713; CCDS3727.1; CCDS75189.1; uc003ies.4; uc010int.4	RefSeq; ENSEMBL; GenBank; Havana transcript; ccdsGene; UCSC Genes	chr4	coding
TC1200010902.hg.1	-1.78067	0.134719	283373	ANKRD52	ankyrin repeat domain 52	NM_173595; ENST00000267116; ENST00000548081; ENST00000548241; ENST00000551023; OTTHUMT00000408538; OTTHUMT00000408539; OTTHUMT00000408542; OTTHUMT00000408543; CCDS44920.1; hsa_circ_0026923; hsa_circ_0026924; hsa_circ_0026925; hsa_circ_0026926; hsa_circ_0026927; hsa_circ_0026928; hsa_circ_0026929; hsa_circ_0026930; hsa_circ_0026931; hsa_circ_0026932; hsa_circ_0026933; hsa_circ_0026934; hsa_circ_00…	RefSeq; ENSEMBL; Havana transcript; ccdsGene; circbase; UCSC Genes; lncRNAWiki; NONCODE	chr12	coding
TC0300013884.hg.1	-1.78003	0.183715	205428	C3orf58	chromosome 3 open reading frame 58	NM_001134470; NM_173552; ENST00000315691; ENST00000441925; ENST00000483808; ENST00000491798; ENST00000492452; ENST00000495414; BC037293; OTTHUMT00000355038; OTTHUMT00000355039; OTTHUMT00000355040; OTTHUMT00000355041; OTTHUMT00000355042; OTTHUMT00000355043; C3orf58.hAug10; CCDS3130.1; CCDS46929.1; hsa_circ_0003756; hsa_circ_0006731; hsa_circ_0067680; uc003evo.4; uc011bnl.3; uc062orp.1; uc062orq.1;…	RefSeq; ENSEMBL; GenBank; Havana transcript; Ace View; ccdsGene; circbase; UCSC Genes; lncRNAWiki; NONCODE	chr3	coding
TC0X00010374.hg.1	-1.77947	0.440494	55998	NXF5	nuclear RNA export factor 5	NM_032946; NR_028089; ENST00000263032; ENST00000332614; ENST00000361330; ENST00000372803; ENST00000473265; ENST00000493509; ENST00000537026; BC131708; OTTHUMT00000057592; OTTHUMT00000057593; OTTHUMT00000057594; OTTHUMT00000057595; OTTHUMT00000057596; OTTHUMT00000359387; CCDS14491.2; NXF5.aAug10; NXF5.bAug10; NXF5.cAug10; NXF5.dAug10; NXF5.eAug10; NXF5.fAug10; uc004eih.2; uc004eii.2; uc004eij.2; u…	RefSeq; ENSEMBL; GenBank; Havana transcript; ccdsGene; Ace View; UCSC Genes	chrX	coding
TC0100017866.hg.1	-1.77854	0.139562	645745	MT1HL1	metallothionein 1H-like 1	NM_001276687; ENST00000464121; OTTHUMT00000096642; CCDS31068.1; MT1P2.aAug10-unspliced; uc001hyk.2; NONHSAT010439	RefSeq; ENSEMBL; Havana transcript; ccdsGene; Ace View; UCSC Genes; NONCODE	chr1	coding
TC1000012144.hg.1	-1.77766	0.399438		CTBP2	Transcript Identified by AceView, Entrez Gene ID(s) 1488	CTBP2.qAug10-unspliced; CTBP2.tAug10	Ace View	chr10	ncrna
TC0300006471.hg.1	-1.77603	0.103018	6419	SETMAR	SET domain and mariner transposase fusion gene	NM_001243723; NM_001276325; NM_006515; NR_024022; NR_075073; ENST00000358065; ENST00000358950; ENST00000413809; ENST00000425046; ENST00000425863; ENST00000430981; ENST00000462115; ENST00000490691; BC011635; OTTHUMT00000206587; OTTHUMT00000318401; OTTHUMT00000318402; OTTHUMT00000318404; OTTHUMT00000318405; OTTHUMT00000337908; OTTHUMT00000337909; OTTHUMT00000337911; CCDS2563.2; CCDS58814.1; CCDS635…	RefSeq; ENSEMBL; GenBank; Havana transcript; ccdsGene; circbase; UCSC Genes; lncRNAWiki; NONCODE	chr3	coding
TC0300007617.hg.1	-1.77577	0.0235131	200845	KCTD6	potassium channel tetramerization domain containing 6	NM_001128214; NM_153331; ENST00000355076; ENST00000404589; ENST00000479179; ENST00000479470; ENST00000490264; ENST00000491093; BC022893; OTTHUMT00000353591; OTTHUMT00000353592; OTTHUMT00000353593; OTTHUMT00000353594; OTTHUMT00000353595; OTTHUMT00000353596; CCDS2891.1; KCTD6.dAug10; uc003dkj.5; uc003dkk.5; uc062lak.1; uc062lal.1; uc062lam.1; uc062lan.1; NONHSAT090132	RefSeq; ENSEMBL; GenBank; Havana transcript; ccdsGene; Ace View; UCSC Genes; lncRNAWiki; NONCODE	chr3	coding
TC0900012231.hg.1	-1.77525	0.0603795	6461	SHB	Src homology 2 domain containing adaptor protein B	NM_003028; ENST00000377707; BC136581; BC136582; OTTHUMT00000052490; CCDS43806.1; hsa_circ_0004167; hsa_circ_0087091; uc004aax.4; NONHSAT131128	RefSeq; ENSEMBL; GenBank; Havana transcript; ccdsGene; circbase; UCSC Genes; lncRNAWiki; NONCODE	chr9	coding
TC0700007034.hg.1	-1.77516	0.147852	9586	CREB5	cAMP responsive element binding protein 5	NM_001011666; NM_004904; NM_182898; NM_182899; ENST00000357727; ENST00000396298; ENST00000396299; ENST00000396300; ENST00000409603; ENST00000424599; ENST00000426500; ENST00000461921; ENST00000468391; ENST00000468813; ENST00000469531; ENST00000478078; ENST00000482692; ENST00000484383; ENST00000498316; BC059400; OTTHUMT00000214204; OTTHUMT00000214205; OTTHUMT00000327908; OTTHUMT00000327909; OTTHUMT…	RefSeq; ENSEMBL; GenBank; Havana transcript; UCSC Genes; ccdsGene; Ace View; circbase; Guo; lncRNAWiki; NONCODE	chr7	coding
TC0X00008712.hg.1	-1.77401	0.0401156	10046	MAMLD1	mastermind-like domain containing 1	NM_001177465; NM_001177466; NM_005491; ENST00000262858; ENST00000358892; ENST00000370401; ENST00000426613; ENST00000432680; ENST00000464149; ENST00000468306; BC136324; OTTHUMT00000060844; OTTHUMT00000060845; OTTHUMT00000316373; OTTHUMT00000316374; OTTHUMT00000403341; uc004fee.2; uc011mxv.2; CCDS14693.2; CCDS55525.1; CCDS55526.1; hsa_circ_0008541; hsa_circ_0091678; uc011mxu.4; uc065bop.1; uc065boq…	RefSeq; ENSEMBL; GenBank; Havana transcript; UCSC Genes; ccdsGene; circbase; lncRNAWiki; NONCODE	chrX	coding
TC0200006627.hg.1	-1.77277	0.00245928	3398	ID2	inhibitor of DNA binding 2, dominant negative helix-loop-helix protein	NM_002166; ENST00000234091; ENST00000331129; ENST00000396290; ENST00000472142; BC030639; OTTHUMT00000231925; OTTHUMT00000323327; OTTHUMT00000323328; CCDS1659.1; uc002qza.4; uc061glp.1; uc061glq.1; uc061glr.1; NONHSAT069014	RefSeq; ENSEMBL; GenBank; Havana transcript; ccdsGene; UCSC Genes; lncRNAWiki; NONCODE	chr2	coding
TC0600012038.hg.1	-1.77257	0.000880433	4172	MCM3	minichromosome maintenance complex component 3	NM_001270472; NM_002388; ENST00000229854; ENST00000419835; ENST00000421471; ENST00000476448; ENST00000596288; ENST00000596983; ENST00000616552; BC001626; BC003509; OTTHUMT00000040897; OTTHUMT00000040899; OTTHUMT00000040900; OTTHUMT00000464551; OTTHUMT00000470784; CCDS4940.2; CCDS75468.1; hsa_circ_0076726; hsa_circ_0076727; hsa_circ_0076728; hsa_circ_0076729; hsa_circ_0076730; hsa_circ_0076731; hs…	RefSeq; ENSEMBL; GenBank; Havana transcript; ccdsGene; circbase; UCSC Genes	chr6	coding
TC0300012403.hg.1	-1.77252	0.0311916	23023	TMCC1	transmembrane and coiled-coil domain family 1	NM_001017395; NM_001128224; NR_033361; ENST00000393238; ENST00000426664; ENST00000432054; ENST00000503256; ENST00000505616; ENST00000505924; ENST00000508729; ENST00000508869; ENST00000509440; ENST00000510323; ENST00000510521; ENST00000512902; ENST00000513411; ENST00000515024; BC039859; OTTHUMT00000356323; OTTHUMT00000356418; OTTHUMT00000356419; OTTHUMT00000356420; OTTHUMT00000356421; OTTHUMT00000…	RefSeq; ENSEMBL; GenBank; Havana transcript; UCSC Genes; ccdsGene; circbase; Ace View; Guo; lncRNAWiki; NONCODE	chr3	coding
TC1100011652.hg.1	-1.7725	0.0925596	81544	GDPD5	glycerophosphodiester phosphodiesterase domain containing 5	NM_030792; ENST00000336898; ENST00000443276; ENST00000524785; ENST00000526177; ENST00000527322; ENST00000527820; ENST00000528031; ENST00000529095; ENST00000529721; ENST00000531441; ENST00000531561; ENST00000531759; ENST00000532435; ENST00000533784; ENST00000533805; ENST00000533911; ENST00000534322; BC018771; BC033391; OTTHUMT00000384405; OTTHUMT00000384406; OTTHUMT00000384407; OTTHUMT00000384408;…	RefSeq; ENSEMBL; GenBank; Havana transcript; UCSC Genes; ccdsGene; Ace View; circbase; lncRNAWiki; NONCODE	chr11	coding
TC1100012420.hg.1	-1.77175	0.375268	116519	APOA5	apolipoprotein A-V	NM_001166598; NM_052968; ENST00000227665; ENST00000433069; ENST00000542499; BC101787; BC101789; CCDS8376.2; uc001ppr.4; uc058hqs.1; uc058hqt.1; OTTHUMT00000106285; OTTHUMT00000142231	RefSeq; ENSEMBL; GenBank; ccdsGene; UCSC Genes; Havana transcript	chr11	coding
TC0600014205.hg.1	-1.77105	0.307056	401285	TCP10L2	t-complex 10-like 2	ENST00000539001; OTTHUMT00000400795; uc063swk.1; NONHSAT116082; TCONS_l2_00024523	ENSEMBL; Havana transcript; UCSC Genes; lncRNAWiki; NONCODE; lncRNA Db	chr6	coding
TC0300007067.hg.1	-1.77089	0.141083	4615	MYD88	myeloid differentiation primary response 88	NM_001172566; NM_001172567; NM_001172568; NM_001172569; NM_002468; ENST00000396334; ENST00000416282; ENST00000417037; ENST00000421516; ENST00000424893; ENST00000443433; ENST00000460295; ENST00000463956; ENST00000481122; ENST00000484513; ENST00000495303; BC013589; OTTHUMT00000253743; OTTHUMT00000341515; OTTHUMT00000341516; OTTHUMT00000341519; OTTHUMT00000341520; OTTHUMT00000342700; OTTHUMT00000342…	RefSeq; ENSEMBL; GenBank; Havana transcript; ccdsGene; circbase; UCSC Genes; lncRNAWiki; NONCODE	chr3	coding
TC1100011346.hg.1	-1.76973	0.117444	254552	NUDT8	nudix hydrolase 8	NM_001243750; NM_181843; ENST00000301490; ENST00000376693; ENST00000534054; BC018644; OTTHUMT00000394035; OTTHUMT00000394036; OTTHUMT00000394037; CCDS58151.1; CCDS8174.1; uc001omn.4; uc001omo.3; uc058eju.1	RefSeq; ENSEMBL; GenBank; Havana transcript; ccdsGene; UCSC Genes	chr11	coding
TC1100010990.hg.1	-1.76971	0.0359175	54948	MRPL16	mitochondrial ribosomal protein L16	NM_017840; ENST00000300151; ENST00000525470; ENST00000531802; ENST00000534340; BC001040; BC019269; OTTHUMT00000394521; OTTHUMT00000394522; OTTHUMT00000394523; OTTHUMT00000394525; uc001noh.2; CCDS7976.1; uc058bsa.1; uc058bsb.1; uc058bsc.1; NONHSAT021546; NONHSAT021547	RefSeq; ENSEMBL; GenBank; Havana transcript; UCSC Genes; ccdsGene; lncRNAWiki; NONCODE	chr11	coding
TC0300011264.hg.1	-1.76931	0.065404	54756	IL17RD	interleukin 17 receptor D	NM_017563; ENST00000296318; ENST00000320057; ENST00000463523; ENST00000467210; ENST00000469841; ENST00000479825; ENST00000498471; BC111702; OTTHUMT00000316679; OTTHUMT00000316680; OTTHUMT00000352662; OTTHUMT00000352664; OTTHUMT00000352665; OTTHUMT00000352666; OTTHUMT00000352667; uc003dil.3; CCDS2880.2; hsa_circ_0066245; hsa_circ_0066246; IL17RD.aAug10; IL17RD.dAug10; IL17RD.eAug10; uc010hna.4; uc…	RefSeq; ENSEMBL; GenBank; Havana transcript; UCSC Genes; ccdsGene; circbase; Ace View; lncRNAWiki; NONCODE	chr3	coding
TC1000012510.hg.1	-1.76885	0.11811	118472	ZNF511	zinc finger protein 511	NM_145806; NR_130127; ENST00000359035; ENST00000361518; ENST00000463816; ENST00000482153; BC019897; OTTHUMT00000051142; OTTHUMT00000051143; OTTHUMT00000051144; OTTHUMT00000051145; CCDS7677.1; hsa_circ_0020570; hsa_circ_0020571; hsa_circ_0020572; hsa_circ_0020573; hsa_circ_0020574; uc001lmj.2; uc001lml.2; uc057wyx.1; uc057wyy.1; NONHSAT017143	RefSeq; ENSEMBL; GenBank; Havana transcript; ccdsGene; circbase; UCSC Genes; lncRNAWiki; NONCODE	chr10	coding
TC1100012613.hg.1	-1.76791	0.000170568	3312; 85389; 85390	HSPA8; SNORD14C; SNORD14D	heat shock 70kDa protein 8; small nucleolar RNA, C/D box 14C; small nucleolar RNA, C/D box 14D	NM_006597; NM_153201; NR_001453; NR_001454; ENST00000227378; ENST00000365382; ENST00000384390; ENST00000453788; ENST00000524552; ENST00000524590; ENST00000525463; ENST00000525624; ENST00000526110; ENST00000526686; ENST00000526862; ENST00000527387; ENST00000527983; ENST00000528292; ENST00000530391; ENST00000531063; ENST00000532091; ENST00000532167; ENST00000532182; ENST00000532636; ENST00000532780…	RefSeq; ENSEMBL; GenBank; Havana transcript; ccdsGene; circbase; Ace View; UCSC Genes; lncRNAWiki; NONCODE	chr11	coding
TC1600008567.hg.1	-1.76777	0.12481	55839	CENPN	centromere protein N	NM_001100624; NM_001100625; NM_001270473; NM_001270474; NM_018455; ENST00000299572; ENST00000305850; ENST00000393335; ENST00000428963; ENST00000439957; ENST00000562943; ENST00000564669; ENST00000568445; ENST00000569461; BC007334; BC008972; OTTHUMT00000269051; OTTHUMT00000269052; OTTHUMT00000269053; OTTHUMT00000431958; OTTHUMT00000431959; OTTHUMT00000431960; OTTHUMT00000431961; OTTHUMT00000431962;…	RefSeq; ENSEMBL; GenBank; Havana transcript; ccdsGene; Ace View; lncRNAWiki; circbase; UCSC Genes; RNACentral; NONCODE	chr16	coding
TC0600007701.hg.1	-1.76747	0.0361164	5252	PHF1	PHD finger protein 1	NM_002636; NM_024165; NR_027692; ENST00000374512; ENST00000374516; ENST00000427004; ENST00000427826; ENST00000428274; ENST00000459809; ENST00000479029; ENST00000486845; ENST00000487667; ENST00000488767; ENST00000495509; BC008834; OTTHUMT00000076174; OTTHUMT00000076175; OTTHUMT00000276478; OTTHUMT00000276479; OTTHUMT00000276480; OTTHUMT00000276481; OTTHUMT00000276482; OTTHUMT00000276483; OTTHUMT00…	RefSeq; ENSEMBL; GenBank; Havana transcript; ccdsGene; UCSC Genes; circbase; lncRNAWiki; NONCODE	chr6	coding
TC0100009109.hg.1	-1.76742	0.475215	126969	SLC44A3	solute carrier family 44, member 3	NM_001114106; NM_001258340; NM_001258341; NM_001258342; NM_001258343; NM_001301079; NM_152369; ENST00000271227; ENST00000422520; ENST00000446120; ENST00000467909; ENST00000475883; ENST00000527077; ENST00000529450; ENST00000530397; ENST00000532427; ENST00000532670; BC053877; OTTHUMT00000029544; OTTHUMT00000029545; OTTHUMT00000029546; OTTHUMT00000029547; OTTHUMT00000382368; OTTHUMT00000382369; OTTH…	RefSeq; ENSEMBL; GenBank; Havana transcript; ccdsGene; Ace View; UCSC Genes	chr1	coding
TC2000008894.hg.1	-1.7672	0.0986986	1869	E2F1	E2F transcription factor 1	NM_005225; ENST00000343380; BC050369; BC058902; OTTHUMT00000078731; CCDS13224.1; hsa_circ_0059873; hsa_circ_0059874; hsa_circ_0059875; hsa_circ_0059876; hsa_circ_0059877; hsa_circ_0059878; uc002wzu.5	RefSeq; ENSEMBL; GenBank; Havana transcript; ccdsGene; circbase; UCSC Genes	chr20	coding
TC1600008940.hg.1	-1.76681	0.343953		AXIN1	Memczak2013 ALT_ACCEPTOR, ALT_DONOR, coding, INTERNAL, intronic best transcript NM_003502	hsa_circ_0000662	circbase	chr16	ncrna
TC0800012165.hg.1	-1.7665	0.469505	23513; 100126338	SCRIB; MIR937	scribbled planar cell polarity protein; microRNA 937	NM_015356; NM_182706; NR_030633; ENST00000320476; ENST00000356994; ENST00000377533; ENST00000401271; ENST00000525051; ENST00000526832; ENST00000531163; ENST00000531942; ENST00000546337; OTTHUMT00000382214; OTTHUMT00000382215; OTTHUMT00000382216; OTTHUMT00000382217; OTTHUMT00000382218; OTTHUMT00000382220; OTTHUMT00000382221; OTTHUMT00000396101; uc003yzo.1; uc003yzp.1; uc022bck.1; CCDS6411.1; CCDS6…	RefSeq; ENSEMBL; Havana transcript; UCSC Genes; ccdsGene; circbase; Ace View; RNACentral; lncRNAWiki; NONCODE	chr8	coding
TC0500009585.hg.1	-1.76635	0.159891	285598	ARL10	ADP-ribosylation factor like GTPase 10	NM_173664; ENST00000310389; ENST00000503175; ENST00000507151; ENST00000514533; BC059361; OTTHUMT00000253145; OTTHUMT00000371941; OTTHUMT00000371942; OTTHUMT00000371943; ARL10andHIGD2A.jAug10; CCDS4400.1; hsa_circ_0075105; uc003mec.2; uc063jyc.1; uc063jyd.1; uc063jye.1; NONHSAT105347; NONHSAT105349	RefSeq; ENSEMBL; GenBank; Havana transcript; Ace View; ccdsGene; circbase; UCSC Genes; lncRNAWiki; NONCODE	chr5	coding
TC0300007223.hg.1	-1.76614	0.00728038	56992	KIF15	kinesin family member 15	NM_020242; ENST00000326047; ENST00000422209; ENST00000425755; ENST00000438321; ENST00000453693; ENST00000481166; ENST00000493134; BC117174; OTTHUMT00000343831; OTTHUMT00000343832; OTTHUMT00000343899; OTTHUMT00000343900; OTTHUMT00000343901; OTTHUMT00000343902; OTTHUMT00000344250; CCDS33744.1; hsa_circ_0002912; hsa_circ_0005439; hsa_circ_0006084; hsa_circ_0065026; hsa_circ_0065027; hsa_circ_0065028…	RefSeq; ENSEMBL; GenBank; Havana transcript; ccdsGene; circbase; Ace View; UCSC Genes; Guo	chr3	coding
TC0600011354.hg.1	-1.7659	0.282334	10107	TRIM10	tripartite motif containing 10	NM_006778; NM_052828; ENST00000376704; ENST00000449742; BC093926; BC113419; OTTHUMT00000076634; OTTHUMT00000076635; CCDS34375.1; CCDS4676.1; uc003npn.3; uc003npo.4	RefSeq; ENSEMBL; GenBank; Havana transcript; ccdsGene; UCSC Genes	chr6	coding
TC1100012526.hg.1	-1.76564	0.0888974	9099	USP2	ubiquitin specific peptidase 2	NM_001243759; NM_004205; NM_171997; ENST00000260187; ENST00000455332; ENST00000525189; ENST00000525735; ENST00000527843; ENST00000531070; ENST00000532613; BC002854; BC002955; BC041366; OTTHUMT00000388361; OTTHUMT00000388362; OTTHUMT00000388363; OTTHUMT00000388364; OTTHUMT00000388365; OTTHUMT00000388367; OTTHUMT00000388368; CCDS58189.1; CCDS8422.1; CCDS8423.1; hsa_circ_0024592; uc001pwl.5; uc001pw…	RefSeq; ENSEMBL; GenBank; Havana transcript; ccdsGene; circbase; UCSC Genes; lncRNAWiki; NONCODE	chr11	coding
TC2200007114.hg.1	-1.76544	0.0126	7533	YWHAH	tyrosine 3-monooxygenase/tryptophan 5-monooxygenase activation protein, eta	NM_003405; ENST00000248975; ENST00000397492; ENST00000420430; ENST00000443669; ENST00000471374; ENST00000479649; BC003047; OTTHUMT00000075721; OTTHUMT00000128919; OTTHUMT00000128920; OTTHUMT00000128921; OTTHUMT00000128922; OTTHUMT00000319307; CCDS13901.1; hsa_circ_0062966; hsa_circ_0062967; hsa_circ_0062968; uc003alz.4; uc003ama.4; uc062dmb.1; uc062dmc.1; uc062dmd.1; uc062dme.1; YWHAH.aAug10; NON…	RefSeq; ENSEMBL; GenBank; Havana transcript; ccdsGene; circbase; UCSC Genes; Ace View; NONCODE; RNACentral	chr22	coding
TC1200009122.hg.1	-1.76527	0.0361237	23409	SIRT4	sirtuin 4	NM_012240; ENST00000202967; ENST00000536460; ENST00000537892; BC109319; BC109320; OTTHUMT00000402002; OTTHUMT00000402003; OTTHUMT00000402004; CCDS9194.1; SIRT4.fAug10; uc001tyc.4; uc058uay.1; uc058uaz.1; NONHSAT031164	RefSeq; ENSEMBL; GenBank; Havana transcript; ccdsGene; Ace View; UCSC Genes; lncRNAWiki; NONCODE	chr12	coding
TC0600013914.hg.1	-1.76441	0.253227	2853	GPR31	G protein-coupled receptor 31	NM_005299; ENST00000366834; OTTHUMT00000043111; BC167778; CCDS5299.1; uc011egq.3; NONHSAT116083	RefSeq; ENSEMBL; Havana transcript; GenBank; ccdsGene; UCSC Genes; lncRNAWiki	chr6	coding
TC1300006848.hg.1	-1.76136	0.267484		RFC3	Memczak2013 ALT_ACCEPTOR, ALT_DONOR, coding, INTERNAL, intronic best transcript NM_181558	hsa_circ_0000473	circbase	chr13	ncrna
TC1100007785.hg.1	-1.76065	0.00806937	79073	TMEM109	transmembrane protein 109	NM_024092; ENST00000227525; ENST00000536171; ENST00000540280; BC001309; OTTHUMT00000396343; OTTHUMT00000396346; OTTHUMT00000396347; CCDS7996.1; hsa_circ_0005701; hsa_circ_0022223; hsa_circ_0022224; hsa_circ_0022225; uc001nqg.4; uc058bwd.1; uc058bwe.1; NONHSAT021606	RefSeq; ENSEMBL; GenBank; Havana transcript; ccdsGene; circbase; UCSC Genes; lncRNAWiki; NONCODE	chr11	coding
TC0400009048.hg.1	-1.76061	0.107372	7097	TLR2	toll-like receptor 2	NM_003264; ENST00000260010; BC033756; OTTHUMT00000365205; CCDS3784.1; uc063aif.1; NONHSAT098842; NONHSAT098843; NONHSAT098844; NONHSAT098845	RefSeq; ENSEMBL; GenBank; Havana transcript; ccdsGene; UCSC Genes; lncRNAWiki; NONCODE	chr4	coding
TC1300008144.hg.1	-1.76059	0.0640701	7027	TFDP1	transcription factor Dp-1	NM_007111; NR_026580; ENST00000375370; ENST00000408980; ENST00000453989; ENST00000464794; ENST00000465174; ENST00000475254; ENST00000494812; ENST00000544902; BC011685; OTTHUMT00000045918; OTTHUMT00000045919; OTTHUMT00000045920; OTTHUMT00000045921; OTTHUMT00000045922; OTTHUMT00000045923; OTTHUMT00000045924; OTTHUMT00000474623; CCDS9538.1; hsa_circ_0031035; hsa_circ_0031036; hsa_circ_0031037; hsa_c…	RefSeq; ENSEMBL; GenBank; Havana transcript; ccdsGene; circbase; Ace View; UCSC Genes; lncRNAWiki; NONCODE	chr13	coding
TC0100009939.hg.1	-1.75841	0.146152	126626	GABPB2	GA binding protein transcription factor, beta subunit 2	NM_144618; ENST00000368916; ENST00000368918; ENST00000462520; ENST00000467551; ENST00000486076; ENST00000489549; BC027033; OTTHUMT00000033700; OTTHUMT00000033767; OTTHUMT00000033768; OTTHUMT00000033769; OTTHUMT00000033770; OTTHUMT00000033771; CCDS983.1; hsa_circ_0000127; hsa_circ_0014096; hsa_circ_0014097; hsa_circ_0014098; hsa_circ_0014099; hsa_circ_0014100; uc001ewr.3; uc057ksg.1; uc057ksh.1; u…	RefSeq; ENSEMBL; GenBank; Havana transcript; ccdsGene; circbase; UCSC Genes; Guo; lncRNAWiki; NONCODE	chr1	coding
TC0900009253.hg.1	-1.75771	0.0880127	286257	C9orf142	chromosome 9 open reading frame 142	NM_183241; ENST00000371620; ENST00000463765; ENST00000467845; ENST00000481187; ENST00000483807; ENST00000492564; ENST00000493968; ENST00000498095; BC002613; OTTHUMT00000055252; OTTHUMT00000055254; OTTHUMT00000055255; OTTHUMT00000055256; OTTHUMT00000055258; OTTHUMT00000055259; OTTHUMT00000055260; OTTHUMT00000055261; uc004cki.3; C9orf142.eAug10; C9orf142.mAug10; CCDS7020.1; hsa_circ_0089616; hsa_ci…	RefSeq; ENSEMBL; GenBank; Havana transcript; UCSC Genes; Ace View; ccdsGene; circbase; lncRNAWiki; NONCODE	chr9	coding
TC0100014790.hg.1	-1.75689	0.36051	255631	COL24A1	collagen, type XXIV, alpha 1	NM_152890; ENST00000370571; ENST00000426639; ENST00000473734; ENST00000485434; ENST00000496682; BC113654; BC117170; OTTHUMT00000029333; OTTHUMT00000029334; OTTHUMT00000029335; OTTHUMT00000315891; OTTHUMT00000315892; CCDS41353.1; hsa_circ_0005110; hsa_circ_0013074; hsa_circ_0013075; uc001dlj.4; uc057iat.1; uc057iau.1; uc057iaw.1; uc057iax.1; chr1_86590527_86611866; NONHSAT004264	RefSeq; ENSEMBL; GenBank; Havana transcript; ccdsGene; circbase; UCSC Genes; Guo; lncRNAWiki; NONCODE	chr1	coding
TC1100009403.hg.1	-1.75669	0.40743	64221	ROBO3	roundabout guidance receptor 3	NM_022370; ENST00000397801; ENST00000524971; ENST00000525304; ENST00000525448; ENST00000525482; ENST00000526551; ENST00000527196; ENST00000527245; ENST00000528068; ENST00000528144; ENST00000528820; ENST00000529658; ENST00000530647; ENST00000531075; ENST00000531119; ENST00000531545; ENST00000531888; ENST00000532472; ENST00000534598; ENST00000538940; ENST00000543966; OTTHUMT00000387091; OTTHUMT0000…	RefSeq; ENSEMBL; Havana transcript; ccdsGene; Ace View; UCSC Genes; lncRNAWiki; NONCODE	chr11	coding
TC1000006633.hg.1	-1.75662	0.441866	54906	FAM208B	family with sequence similarity 208, member B	NM_017782; ENST00000328090; ENST00000380270; ENST00000459693; ENST00000463468; ENST00000473789; ENST00000477043; ENST00000480839; ENST00000482419; ENST00000487196; ENST00000496681; ENST00000527124; ENST00000532080; ENST00000532424; OTTHUMT00000046570; OTTHUMT00000046571; OTTHUMT00000046572; OTTHUMT00000046573; OTTHUMT00000046574; OTTHUMT00000046575; OTTHUMT00000046576; OTTHUMT00000046577; OTTHUMT…	RefSeq; ENSEMBL; Havana transcript; UCSC Genes; GenBank; Ace View; ccdsGene; circbase; Guo; lncRNAWiki; NONCODE	chr10	coding
TSUnmapped00000410.hg.1	-1.7564	0.180821	55054	ATG16L1	autophagy related 16-like 1	ENST00000630093	ENSEMBL		coding
TC1900007849.hg.1	-1.75611	0.0571197	4099	MAG	myelin associated glycoprotein	NM_001199216; NM_002361; NM_080600; ENST00000361922; ENST00000392213; ENST00000537831; ENST00000593348; ENST00000595791; ENST00000597035; ENST00000597162; ENST00000600291; BC053347; BC093045; OTTHUMT00000466070; OTTHUMT00000466071; OTTHUMT00000466072; OTTHUMT00000466073; OTTHUMT00000466074; OTTHUMT00000466075; OTTHUMT00000466076; OTTHUMT00000466077; CCDS12455.1; CCDS12456.1; CCDS56090.1; MAGandCD…	RefSeq; ENSEMBL; GenBank; Havana transcript; ccdsGene; Ace View; UCSC Genes; lncRNAWiki; NONCODE	chr19	coding
TC1100007426.hg.1	-1.75523	0.0230871	55343	SLC35C1	solute carrier family 35 (GDP-fucose transporter), member C1	NM_001145265; NM_001145266; NM_018389; ENST00000314134; ENST00000442528; ENST00000526817; ENST00000530471; BC001427; OTTHUMT00000390138; OTTHUMT00000390139; OTTHUMT00000392383; OTTHUMT00000392385; CCDS44575.1; CCDS7914.1; SLC35C1.aAug10; uc001nbo.4; uc001nbp.4; uc058atl.1; uc058atm.1	RefSeq; ENSEMBL; GenBank; Havana transcript; ccdsGene; Ace View; UCSC Genes	chr11	coding
TC0300006791.hg.1	-1.75503	0.278879	8850	KAT2B	K(lysine) acetyltransferase 2B	NM_003884; ENST00000263754; ENST00000426228; ENST00000468111; ENST00000468400; ENST00000469085; BC060823; BC070075; OTTHUMT00000252880; OTTHUMT00000340005; OTTHUMT00000340006; OTTHUMT00000340007; OTTHUMT00000340008; CCDS2634.1; hsa_circ_0064564; hsa_circ_0064565; uc003cbq.4; uc062hky.1; uc062hkz.1; uc062hla.1; uc062hlb.1; NONHSAT088611; NONHSAT088613	RefSeq; ENSEMBL; GenBank; Havana transcript; ccdsGene; circbase; UCSC Genes; lncRNAWiki; NONCODE	chr3	coding
TC0700012013.hg.1	-1.75486	0.118589	64599	GIGYF1	GRB10 interacting GYF protein 1	NM_022574; ENST00000275732; ENST00000464111; ENST00000471340; ENST00000472105; OTTHUMT00000347205; OTTHUMT00000347206; OTTHUMT00000347207; OTTHUMT00000347208; BC172395; CCDS34708.1; GIGYF1.eAug10; hsa_circ_0006271; hsa_circ_0081498; hsa_circ_0081499; hsa_circ_0081500; hsa_circ_0081501; hsa_circ_0081502; hsa_circ_0081503; hsa_circ_0081504; hsa_circ_0081505; hsa_circ_0081506; hsa_circ_0081507; hsa_…	RefSeq; ENSEMBL; Havana transcript; GenBank; ccdsGene; Ace View; circbase; UCSC Genes; lncRNAWiki; NONCODE	chr7	coding
TC1500009002.hg.1	-1.75455	0.190758	70	ACTC1	actin, alpha, cardiac muscle 1	NM_005159; ENST00000290378; ENST00000557860; ENST00000560563; BC009978; OTTHUMT00000251876; OTTHUMT00000417524; OTTHUMT00000417525; ACTC1.bAug10; ACTC1.cAug10; CCDS10041.1; hsa_circ_0034355; hsa_circ_0034356; uc001ziu.2; uc059his.1; uc059hit.1	RefSeq; ENSEMBL; GenBank; Havana transcript; Ace View; ccdsGene; circbase; UCSC Genes	chr15	coding
TC1100006973.hg.1	-1.75372	0.230371	340990	OTOG	otogelin	NM_001277269; NM_001292063; ENST00000342528; ENST00000399391; ENST00000399397; ENST00000428619; ENST00000485669; ENST00000498332; OTTHUMT00000313843; OTTHUMT00000313844; OTTHUMT00000313845; OTTHUMT00000313846; OTTHUMT00000313847; uc001mnh.1; CCDS59225.1; uc031pzc.1; uc057znr.1; uc057zns.1; uc057znt.1; uc057znu.1; TCONS_l2_00004425; TCONS_l2_00004426; TCONS_l2_00004427	RefSeq; ENSEMBL; Havana transcript; UCSC Genes; ccdsGene; lncRNA Db	chr11	coding
TC0900011654.hg.1	-1.75302	0.0475096	84885	ZDHHC12	zinc finger, DHHC-type containing 12	NM_032799; ENST00000372663; ENST00000372667; ENST00000406904; ENST00000452105; ENST00000467312; BC009280; BC048251; OTTHUMT00000054481; OTTHUMT00000054482; OTTHUMT00000054483; OTTHUMT00000054484; OTTHUMT00000054486; CCDS6909.1; hsa_circ_0088906; uc004bvy.4; uc033dim.2; uc064wgo.1; uc064wgp.1; uc064wgq.1	RefSeq; ENSEMBL; GenBank; Havana transcript; ccdsGene; circbase; UCSC Genes	chr9	coding
TC0700010202.hg.1	-1.75302	0.0340529	392862	GRID2IP	glutamate receptor, ionotropic, delta 2 (Grid2) interacting protein	NM_001145118; ENST00000435185; ENST00000452113; ENST00000457091; OTTHUMT00000340534; OTTHUMT00000340536; OTTHUMT00000340537; CCDS47537.1; GRID2IP.aAug10; uc011jwx.3; uc064bid.1; uc064bie.1	RefSeq; ENSEMBL; Havana transcript; ccdsGene; Ace View; UCSC Genes	chr7	coding
TC1900007688.hg.1	-1.7523	0.10724	898	CCNE1	cyclin E1	NM_001238; ENST00000262643; ENST00000357943; ENST00000444983; ENST00000574121; ENST00000575243; ENST00000576532; ENST00000586912; BC035498; OTTHUMT00000438138; OTTHUMT00000438139; OTTHUMT00000438140; OTTHUMT00000438141; OTTHUMT00000438142; OTTHUMT00000459400; CCDS12419.1; CCNE1.eAug10; hsa_circ_0050332; uc002nsn.4; uc002nso.4; uc032hte.1; uc060wov.1; uc060wow.1; uc060wox.1; uc060woy.1; NONHSAT064…	RefSeq; ENSEMBL; GenBank; Havana transcript; ccdsGene; Ace View; circbase; UCSC Genes; lncRNAWiki; NONCODE	chr19	coding
TC0100012869.hg.1	-1.75117	0.127184	6723	SRM	spermidine synthase	NM_003132; ENST00000376957; ENST00000459997; ENST00000465788; ENST00000475189; ENST00000487300; ENST00000490101; BC000309; BC033106; OTTHUMT00000006056; OTTHUMT00000006057; OTTHUMT00000006059; OTTHUMT00000006060; OTTHUMT00000006061; OTTHUMT00000006062; CCDS125.1; hsa_circ_0009749; hsa_circ_0009750; hsa_circ_0009751; hsa_circ_0009752; hsa_circ_0009753; hsa_circ_0009754; hsa_circ_0009755; hsa_circ_…	RefSeq; ENSEMBL; GenBank; Havana transcript; ccdsGene; circbase; Ace View; UCSC Genes	chr1	coding
TC1000011719.hg.1	-1.75104	0.285516	255022	CALHM1	calcium homeostasis modulator 1	NM_001001412; ENST00000329905; BC036193; BC036208; OTTHUMT00000050165; CCDS7550.1; uc001kxe.3	RefSeq; ENSEMBL; GenBank; Havana transcript; ccdsGene; UCSC Genes	chr10	coding
TC1800007506.hg.1	-1.75103	0.131223	8792	TNFRSF11A	tumor necrosis factor receptor superfamily, member 11a, NFKB activator	NM_001270949; NM_001270950; NM_001270951; NM_001278268; NM_003839; ENST00000269485; ENST00000586569; ENST00000587697; ENST00000592013; ENST00000616710; ENST00000617039; OTTHUMT00000256186; OTTHUMT00000450047; OTTHUMT00000450048; OTTHUMT00000450049; CCDS11980.1; CCDS59324.1; CCDS74227.1; CCDS74228.1; hsa_circ_0047879; hsa_circ_0047880; hsa_circ_0047881; uc002lin.5; uc010dpv.5; uc031rin.1; uc031rio…	RefSeq; ENSEMBL; Havana transcript; ccdsGene; circbase; UCSC Genes; Guo; lncRNAWiki; NONCODE	chr18	coding
TC1100010981.hg.1	-1.75097	0.0961137	219988	PATL1	protein associated with topoisomerase II homolog 1 (yeast)	NM_152716; ENST00000300146; ENST00000531919; BC065264; BC109038; BC109039; OTTHUMT00000394559; OTTHUMT00000394561; CCDS44613.1; hsa_circ_0004162; hsa_circ_0004988; hsa_circ_0022201; hsa_circ_0022202; hsa_circ_0022203; hsa_circ_0022204; hsa_circ_0022205; hsa_circ_0022206; hsa_circ_0022207; hsa_circ_0022208; uc001noe.6; uc058brq.1; chr11_59410352_59415386; chr11_59426338_59426942; NONHSAT021536	RefSeq; ENSEMBL; GenBank; Havana transcript; ccdsGene; circbase; UCSC Genes; Guo; lncRNAWiki; NONCODE	chr11	coding
TC0200011990.hg.1	-1.7505	0.0198822	391356	PTRHD1	peptidyl-tRNA hydrolase domain containing 1	NM_001013663; ENST00000328379; ENST00000467797; ENST00000474668; ENST00000480190; ENST00000487316; ENST00000492046; BC073803; OTTHUMT00000324626; OTTHUMT00000324627; OTTHUMT00000324628; OTTHUMT00000324629; OTTHUMT00000324630; OTTHUMT00000324631; C2orf79.dAug10; C2orf79.fAug10; CCDS33156.1; hsa_circ_0052996; uc002rfm.4; uc061hdg.1; uc061hdh.1; uc061hdi.1; uc061hdj.1; uc061hdk.1; NONHSAT069598; NON…	RefSeq; ENSEMBL; GenBank; Havana transcript; Ace View; ccdsGene; circbase; UCSC Genes; lncRNAWiki; NONCODE	chr2	coding
TC0X00007936.hg.1	-1.75035	0.145028	2491	CENPI	centromere protein I	NM_006733; ENST00000372926; ENST00000372927; ENST00000403304; ENST00000423383; ENST00000435570; BC012462; OTTHUMT00000057516; OTTHUMT00000057517; OTTHUMT00000057518; OTTHUMT00000057519; CCDS14479.1; hsa_circ_0006367; hsa_circ_0091236; hsa_circ_0091237; hsa_circ_0091238; hsa_circ_0091239; hsa_circ_0091240; hsa_circ_0091241; hsa_circ_0091242; hsa_circ_0091243; hsa_circ_0091244; hsa_circ_0091245; hs…	RefSeq; ENSEMBL; GenBank; Havana transcript; ccdsGene; circbase; UCSC Genes; Guo	chrX	coding
TC0300007657.hg.1	-1.75029	0.0922542	57415	C3orf14	chromosome 3 open reading frame 14	NM_001291941; NM_001291942; NM_001291943; NM_020685; ENST00000232519; ENST00000462069; ENST00000465142; ENST00000486169; ENST00000491323; ENST00000494481; ENST00000542214; BC017772; OTTHUMT00000351807; OTTHUMT00000351808; OTTHUMT00000351809; OTTHUMT00000351810; OTTHUMT00000351811; OTTHUMT00000351812; CCDS2896.1; uc003dlf.4; uc003dlg.4; uc010hnq.4; uc062lcv.1; uc062lcw.1; uc062lcx.1; uc062lcy.1; N…	RefSeq; ENSEMBL; GenBank; Havana transcript; ccdsGene; UCSC Genes; lncRNAWiki; NONCODE	chr3	coding
TC0100011378.hg.1	-1.75024	0.167163	83593	RASSF5	Ras association (RalGDS/AF-6) domain family member 5	NM_182663; NM_182664; NM_182665; ENST00000577571; ENST00000579436; ENST00000579942; ENST00000580449; ENST00000581503; ENST00000581888; ENST00000605120; ENST00000605653; BC004270; BC007203; BC042651; OTTHUMT00000468959; OTTHUMT00000468960; OTTHUMT00000468961; OTTHUMT00000468962; OTTHUMT00000468963; OTTHUMT00000468964; OTTHUMT00000468965; OTTHUMT00000468966; CCDS1463.1; CCDS1464.1; CCDS30998.1; hsa…	RefSeq; ENSEMBL; GenBank; Havana transcript; ccdsGene; circbase; Ace View; UCSC Genes	chr1	coding
TC0500008882.hg.1	-1.75014	0.0112358	56125	PCDHB11	protocadherin beta 11	NM_018931; ENST00000354757; ENST00000624887; BC112132; BC113611; OTTHUMT00000251813; OTTHUMT00000478889; CCDS4253.1; uc003liy.4; uc063hzy.1	RefSeq; ENSEMBL; GenBank; Havana transcript; ccdsGene; UCSC Genes	chr5	coding
TC0X00010131.hg.1	-1.7494	0.223413	441531	PGAM4	phosphoglycerate mutase family member 4	NM_001029891; ENST00000458128; OTTHUMT00000128371; CCDS35338.1; uc004ecy.2	RefSeq; ENSEMBL; Havana transcript; ccdsGene; UCSC Genes	chrX	coding
TC1900009630.hg.1	-1.74889	0.482195	9817	KEAP1	kelch-like ECH-associated protein 1	NM_012289; NM_203500; ENST00000171111; ENST00000393623; ENST00000585845; ENST00000588024; ENST00000590237; ENST00000590593; ENST00000591039; ENST00000591419; ENST00000592055; ENST00000592478; BC002417; BC002930; BC015945; OTTHUMT00000452000; OTTHUMT00000452001; OTTHUMT00000452002; OTTHUMT00000452003; OTTHUMT00000452004; OTTHUMT00000452005; OTTHUMT00000452006; OTTHUMT00000452007; OTTHUMT0000045200…	RefSeq; ENSEMBL; GenBank; Havana transcript; ccdsGene; circbase; Ace View; UCSC Genes	chr19	coding
TC1600009349.hg.1	-1.74817	0.00779349	2903	GRIN2A	glutamate receptor, ionotropic, N-methyl D-aspartate 2A	NM_000833; NM_001134407; NM_001134408; ENST00000330684; ENST00000396573; ENST00000396575; ENST00000461292; ENST00000463531; ENST00000535259; ENST00000562109; ENST00000566665; ENST00000566670; ENST00000566683; ENST00000568247; BC117131; BC143273; CCDS10539.1; CCDS45407.1; ENST00000562861.1; GRIN2A.eAug10; GRIN2A.jAug10; uc002czo.5; uc002czr.5; uc010uym.3; uc010uyn.3; uc059qrl.1; uc059qrm.1; uc059q…	RefSeq; ENSEMBL; GenBank; ccdsGene; lncRNAWiki; Ace View; UCSC Genes; RNACentral; NONCODE; Havana transcript	chr16	coding
TC1000010609.hg.1	-1.74806	0.0197597	55753	OGDHL	oxoglutarate dehydrogenase-like	NM_001143996; NM_001143997; NM_018245; ENST00000374103; ENST00000419399; ENST00000432695; ENST00000471460; ENST00000490844; ENST00000496884; BC026320; OTTHUMT00000048007; OTTHUMT00000048008; OTTHUMT00000048009; OTTHUMT00000048010; CCDS44390.1; CCDS44391.1; CCDS7234.1; uc001jie.4; uc010qgt.3; uc010qgu.3; uc057tfb.1; uc057tfc.1; uc057tfd.1	RefSeq; ENSEMBL; GenBank; Havana transcript; ccdsGene; UCSC Genes	chr10	coding
TC0400009182.hg.1	-1.74782	0.511176		MARCH1	Memczak2013 ANTISENSE, coding, INTERNAL, intronic best transcript NM_001166373	hsa_circ_0001455	circbase	chr4	ncrna
TC1700006748.hg.1	-1.74756	0.0639356	284114	TMEM102	transmembrane protein 102	NM_178518; ENST00000323206; ENST00000396568; BC046189; OTTHUMT00000256405; OTTHUMT00000256406; uc002ggx.1; CCDS11104.1; uc002ggy.3	RefSeq; ENSEMBL; GenBank; Havana transcript; UCSC Genes; ccdsGene	chr17	coding
TC1000012496.hg.1	-1.74745	0.0796204	57412	AS3MT	arsenite methyltransferase	NM_020682; ENST00000369880; ENST00000615257; OTTHUMT00000050107; BC160057; CCDS41567.1; hsa_circ_0019773; hsa_circ_0019774; hsa_circ_0019775; uc001kwk.4; uc057vru.1; chr10_104632204_104634418; chr10_104632204_104634957; chr10_104638135_104638748	RefSeq; ENSEMBL; Havana transcript; GenBank; ccdsGene; circbase; UCSC Genes; Guo	chr10	coding
TC1100006911.hg.1	-1.74639	0.148356	10418	SPON1	spondin 1, extracellular matrix protein	NM_006108; ENST00000576479; ENST00000591785; BC136513; BC136563; OTTHUMT00000456656; OTTHUMT00000456657; CCDS73262.1; ENST00000310358.7; ENST00000526298.1; ENST00000533633.1; uc031xfv.2; uc057zhn.1	RefSeq; ENSEMBL; GenBank; Havana transcript; ccdsGene; lncRNAWiki; UCSC Genes	chr11	coding
TC1600009864.hg.1	-1.74557	0.247849	246778	IL27	interleukin 27	NM_145659; ENST00000356897; ENST00000568075; BC062422; OTTHUMT00000214114; OTTHUMT00000430973; uc002dqc.3; CCDS10633.1; uc059snr.1	RefSeq; ENSEMBL; GenBank; Havana transcript; UCSC Genes; ccdsGene	chr16	coding
TC0400008551.hg.1	-1.74496	0.0342093	171024	SYNPO2	synaptopodin 2	NM_001128933; NM_001128934; NM_001286754; NM_001286755; NM_133477; ENST00000307142; ENST00000429713; ENST00000434046; ENST00000448416; ENST00000504178; ENST00000610556; BC136256; BC150629; OTTHUMT00000364018; OTTHUMT00000364019; OTTHUMT00000364020; OTTHUMT00000364021; OTTHUMT00000480984; uc010inb.3; CCDS34054.1; CCDS47128.1; CCDS47129.1; CCDS75185.1; CCDS75186.1; uc003icm.6; uc010ina.5; uc011cgh.…	RefSeq; ENSEMBL; GenBank; Havana transcript; UCSC Genes; ccdsGene; lncRNAWiki; NONCODE; lncRNA Db	chr4	coding
TC0100014762.hg.1	-1.74464	0.0532397	117178	SSX2IP	synovial sarcoma, X breakpoint 2 interacting protein	NM_001166293; NM_001166294; NM_001166295; NM_001166417; NM_014021; ENST00000342203; ENST00000422026; ENST00000437941; ENST00000459708; ENST00000460500; ENST00000476905; ENST00000481102; ENST00000490476; ENST00000603677; ENST00000605755; BC033637; BC064389; OTTHUMT00000027469; OTTHUMT00000027470; OTTHUMT00000027471; OTTHUMT00000027472; OTTHUMT00000027473; OTTHUMT00000092675; OTTHUMT00000092676; OT…	RefSeq; ENSEMBL; GenBank; Havana transcript; UCSC Genes; ccdsGene; circbase; Ace View; Guo; lncRNAWiki; NONCODE	chr1	coding
TC2000007905.hg.1	-1.74397	0.028679	79160	LOC79160; RP5-907D15.4	uncharacterized LOC79160; novel transcript	NR_125359; ENST00000598340; BC002831; OTTHUMT00000474786; uc061yad.1; LK937951.1:1..967:ncRNA	RefSeq; ENSEMBL; GenBank; Havana transcript; UCSC Genes; RNACentral	chr20	ncrna
TC0200014249.hg.1	-1.74181	0.0932533	91409	CCDC74B	coiled-coil domain containing 74B	NM_001258307; NM_207310; ENST00000310463; ENST00000392984; ENST00000409128; ENST00000409234; ENST00000409943; ENST00000423263; ENST00000434929; ENST00000441670; ENST00000457413; ENST00000496704; ENST00000498526; BC067771; OTTHUMT00000254522; OTTHUMT00000331886; OTTHUMT00000332002; OTTHUMT00000332003; OTTHUMT00000332004; OTTHUMT00000332005; OTTHUMT00000332006; OTTHUMT00000332008; OTTHUMT0000033200…	RefSeq; ENSEMBL; GenBank; Havana transcript; Ace View; ccdsGene; UCSC Genes; lncRNAWiki; NONCODE	chr2	coding
TC0900007604.hg.1	-1.74181	0.265555	26578	OSTF1	osteoclast stimulating factor 1	NM_012383; ENST00000346234; BC007459; OTTHUMT00000052704; CCDS6651.1; hsa_circ_0087223; hsa_circ_0087224; hsa_circ_0087225; hsa_circ_0087226; uc004ajv.5	RefSeq; ENSEMBL; GenBank; Havana transcript; ccdsGene; circbase; UCSC Genes	chr9	coding
TC1100010889.hg.1	-1.74028	0.341254	10394	PRG3	proteoglycan 3	NM_006093; ENST00000287143; BC069126; BC101613; BC113411; OTTHUMT00000392467; uc001njv.2; CCDS7954.1	RefSeq; ENSEMBL; GenBank; Havana transcript; UCSC Genes; ccdsGene	chr11	coding
TC0100006849.hg.1	-1.73953	0.00256597	10630	IKBKG	inhibitor of kappa light polypeptide gene enhancer in B-cells, kinase gamma	NM_021146; ENST00000376819; ENST00000476934; BC001881; OTTHUMT00000005564; OTTHUMT00000099300; CCDS128.1; uc001ase.5; uc057cgb.1	RefSeq; ENSEMBL; GenBank; Havana transcript; ccdsGene; UCSC Genes	chr1	coding
TC1300009856.hg.1	-1.73942	0.0231995	10426	TUBGCP3	tubulin, gamma complex associated protein 3	NM_001286278; NM_001286279; NM_006322; ENST00000261965; ENST00000375669; ENST00000462580; ENST00000464139; ENST00000469302; ENST00000483532; ENST00000611152; ENST00000618439; BC013781; BC046634; OTTHUMT00000045825; OTTHUMT00000045826; OTTHUMT00000045827; OTTHUMT00000045828; OTTHUMT00000045829; OTTHUMT00000045830; OTTHUMT00000474545; NM_001286277_2; CCDS66584.1; CCDS73599.1; CCDS9525.1; hsa_circ_0…	RefSeq; ENSEMBL; GenBank; Havana transcript; ccdsGene; circbase; Ace View; UCSC Genes; Guo	chr13	coding
TC1200007596.hg.1	-1.7385	0.522402	2819	GPD1	glycerol-3-phosphate dehydrogenase 1	NM_001257199; NM_005276; ENST00000301149; ENST00000547190; ENST00000547964; ENST00000548152; ENST00000548814; ENST00000550172; ENST00000551939; BC032234; OTTHUMT00000406018; OTTHUMT00000406019; OTTHUMT00000406020; OTTHUMT00000406021; OTTHUMT00000406022; OTTHUMT00000406023; OTTHUMT00000406989; CCDS58229.1; CCDS8799.1; GPD1.iAug10; uc001rvz.5; uc001rwa.5; uc058nvu.1; uc058nvv.1; uc058nvw.1; uc058nv…	RefSeq; ENSEMBL; GenBank; Havana transcript; ccdsGene; Ace View; UCSC Genes	chr12	coding
TC2000009265.hg.1	-1.73754	0.0673992		CDH22	Transcript Identified by AceView, Entrez Gene ID(s) 64405	CDH22.eAug10-unspliced	Ace View	chr20	ncrna
TC1900008184.hg.1	-1.73655	0.488838	23152	CIC	capicua transcriptional repressor	NM_001304815; NM_015125; ENST00000160740; ENST00000571033; ENST00000571942; ENST00000572681; ENST00000573349; ENST00000575287; ENST00000575354; ENST00000575839; ENST00000576505; OTTHUMT00000438528; OTTHUMT00000438529; OTTHUMT00000438531; OTTHUMT00000438532; OTTHUMT00000438534; OTTHUMT00000438535; OTTHUMT00000438536; OTTHUMT00000438537; OTTHUMT00000468598; uc002otf.1; CCDS12601.1; CIC.aAug10; hsa_…	RefSeq; ENSEMBL; Havana transcript; UCSC Genes; ccdsGene; Ace View; circbase; lncRNAWiki; NONCODE	chr19	coding
TC0X00007163.hg.1	-1.73571	0.192465	389852	SPACA5	sperm acrosome associated 5	NM_205856; ENST00000304355; ENST00000376940; OTTHUMT00000056452; NM_001079900_2; CCDS14286.1; SPACA5.aAug10; uc004diu.5; uc064ywm.1	RefSeq; ENSEMBL; Havana transcript; ccdsGene; Ace View; UCSC Genes	chrX	coding
TC2200006827.hg.1	-1.73535	0.0239936	2781	GNAZ	guanine nucleotide binding protein (G protein), alpha z polypeptide	NM_002073; ENST00000479571; ENST00000492538; ENST00000615612; BC026342; BC037333; BC078163; BC096828; OTTHUMT00000319073; OTTHUMT00000319076; OTTHUMT00000320285; CCDS13804.1; GNAZ.eAug10; hsa_circ_0002514; hsa_circ_0062515; uc002zwu.2; uc062cei.1; uc062cej.1; chr22_23437433_23438605; NONHSAT083846	RefSeq; ENSEMBL; GenBank; Havana transcript; ccdsGene; Ace View; circbase; UCSC Genes; Guo; lncRNAWiki; NONCODE	chr22	coding
TC0500013336.hg.1	-1.73492	0.254806	23635	SSBP2	single-stranded DNA binding protein 2	NM_001256732; NM_001256733; NM_001256734; NM_001256735; NM_001256736; NM_012446; ENST00000504136; ENST00000504174; ENST00000504985; ENST00000505980; ENST00000506960; ENST00000507472; ENST00000507655; ENST00000507968; ENST00000508912; ENST00000509013; ENST00000509053; ENST00000509743; ENST00000510060; ENST00000512098; ENST00000512923; ENST00000513785; ENST00000514493; ENST00000515395; ENST00000615…	RefSeq; ENSEMBL; GenBank; Havana transcript; ccdsGene; circbase; Ace View; UCSC Genes; lncRNAWiki; NONCODE	chr5	coding
TC0600011127.hg.1	-1.73456	0.0602198	3006	HIST1H1C	histone cluster 1, H1c	NM_005319; ENST00000343677; OTTHUMT00000043372; CCDS4577.1; hsa_circ_0001583; hsa_circ_0005103; uc003nfw.4	RefSeq; ENSEMBL; Havana transcript; ccdsGene; circbase; UCSC Genes	chr6	coding
TC0300013841.hg.1	-1.73416	0.130446	7871	SLMAP	sarcolemma associated protein	ENST00000481846; OTTHUMT00000351582; SLMAP.vdAug10; uc062kxz.1; NONHSAT090098	ENSEMBL; Havana transcript; Ace View; UCSC Genes; lncRNAWiki; NONCODE	chr3	coding
TC1600008899.hg.1	-1.73413	0.654877	92822	ZNF276	zinc finger protein 276	NM_001113525; NM_152287; NR_110122; NR_110126; NR_110128; NR_110129; ENST00000289816; ENST00000443381; ENST00000561536; ENST00000562530; ENST00000563541; ENST00000563983; ENST00000564004; ENST00000568064; ENST00000568295; ENST00000569426; ENST00000569582; ENST00000569901; BC105959; BC107603; BC110348; OTTHUMT00000269927; OTTHUMT00000422156; OTTHUMT00000422157; OTTHUMT00000422515; OTTHUMT000004225…	RefSeq; ENSEMBL; GenBank; Havana transcript; ccdsGene; circbase; UCSC Genes; Ace View; lncRNAWiki; NONCODE	chr16	coding
TC0700013578.hg.1	-1.73362	0.336696	10371	SEMA3A	sema domain, immunoglobulin domain (Ig), short basic domain, secreted, (semaphorin) 3A	NM_006080; ENST00000265362; ENST00000420047; ENST00000436949; BC111416; OTTHUMT00000253355; OTTHUMT00000336604; OTTHUMT00000342239; CCDS5599.1; hsa_circ_0004363; hsa_circ_0080944; hsa_circ_0080945; SEMA3A.bAug10; uc003uhz.4; uc064exm.1; uc064exn.1	RefSeq; ENSEMBL; GenBank; Havana transcript; ccdsGene; circbase; Ace View; UCSC Genes	chr7	coding
TC1100013053.hg.1	-1.7331	0.157487	5883	RAD9A	RAD9 checkpoint clamp component A	ENST00000622583; OTTHUMT00000476368; NR_024469; uc010rpo.2; NONHSAT022393; NONHSAT022394; NONHSAT022395; NONHSAT022396	ENSEMBL; Havana transcript; RefSeq; UCSC Genes; lncRNAWiki; NONCODE	chr11	coding
TC1900010009.hg.1	-1.73268	0.431881	3727	JUND	jun D proto-oncogene	NM_001286968; NM_005354; ENST00000252818; ENST00000600972; OTTHUMT00000466318; OTTHUMT00000466319; CCDS32959.1; uc002nip.4; uc060vps.1	RefSeq; ENSEMBL; Havana transcript; ccdsGene; UCSC Genes	chr19	coding
TC1700006638.hg.1	-1.73227	0.0157336	409	ARRB2	arrestin, beta 2	NM_001257328; NM_001257329; NM_001257330; NM_001257331; NM_004313; NM_199004; NR_047516; ENST00000269260; ENST00000346341; ENST00000381488; ENST00000412477; ENST00000570718; ENST00000570739; ENST00000571206; ENST00000571428; ENST00000571791; ENST00000572457; ENST00000572497; ENST00000572782; ENST00000573886; ENST00000574502; ENST00000574888; ENST00000574954; ENST00000575131; ENST00000575877; ENST…	RefSeq; ENSEMBL; GenBank; Havana transcript; Ace View; ccdsGene; circbase; UCSC Genes; lncRNAWiki; NONCODE	chr17	coding
TC0500010759.hg.1	-1.73151	0.268501	10309	CCNO	cyclin O	NM_021147; NR_125346; NR_125347; NR_125348; ENST00000282572; ENST00000501463; OTTHUMT00000369707; OTTHUMT00000369708; BC160041; CCDS34157.1; hsa_circ_0072466; uc003jpv.4; uc003jpw.4	RefSeq; ENSEMBL; Havana transcript; GenBank; ccdsGene; circbase; UCSC Genes	chr5	coding
TC1500006902.hg.1	-1.7314	0.0521431	283742	FAM98B	family with sequence similarity 98, member B	NM_173611; ENST00000305752; ENST00000397609; ENST00000491535; ENST00000559431; BC093898; OTTHUMT00000252070; OTTHUMT00000252071; OTTHUMT00000418220; OTTHUMT00000418221; CCDS10047.2; hsa_circ_0005001; uc001zkb.3; uc001zkc.4; uc059hmb.1; uc059hmc.1; NONHSAT041712	RefSeq; ENSEMBL; GenBank; Havana transcript; ccdsGene; circbase; UCSC Genes; lncRNAWiki; NONCODE	chr15	coding
TC0700006864.hg.1	-1.73126	0.12667	6671	SP4	Sp4 transcription factor	NM_003112; ENST00000222584; ENST00000432066; ENST00000440636; ENST00000448246; BC109300; BC109301; OTTHUMT00000211617; OTTHUMT00000326588; OTTHUMT00000326589; OTTHUMT00000326783; CCDS5373.1; hsa_circ_0079545; hsa_circ_0079546; SP4.bAug10; uc003sva.4; uc064bwf.1; uc064bwg.1; uc064bwh.1; chr7_21516696_21521741; NONHSAT119447	RefSeq; ENSEMBL; GenBank; Havana transcript; ccdsGene; circbase; Ace View; UCSC Genes; Guo; lncRNAWiki; NONCODE	chr7	coding
TC0900011120.hg.1	-1.73121	0.166681	9314	KLF4	Kruppel-like factor 4 (gut)	NM_004235; ENST00000374672; ENST00000411706; ENST00000420475; ENST00000493306; ENST00000497048; ENST00000610832; BC029923; BC030811; OTTHUMT00000053555; OTTHUMT00000053556; OTTHUMT00000053557; OTTHUMT00000053558; OTTHUMT00000342675; CCDS6770.2; uc004bdf.3; uc004bdg.4; uc064uyp.1; uc064uyq.1; uc064uyr.1; uc064uys.1	RefSeq; ENSEMBL; GenBank; Havana transcript; ccdsGene; UCSC Genes	chr9	coding
TC1900011033.hg.1	-1.73091	0.563259	8775	NAPA	N-ethylmaleimide-sensitive factor attachment protein, alpha	NM_003827; NR_038456; NR_038457; ENST00000263354; ENST00000593761; ENST00000593785; ENST00000593905; ENST00000594001; ENST00000594155; ENST00000594217; ENST00000594288; ENST00000594740; ENST00000595227; ENST00000595826; ENST00000596892; ENST00000597118; ENST00000597160; ENST00000597271; ENST00000597274; ENST00000597778; ENST00000598615; ENST00000601208; ENST00000601927; ENST00000602082; ENST00000…	RefSeq; ENSEMBL; GenBank; Havana transcript; ccdsGene; circbase; Ace View; UCSC Genes; lncRNAWiki; NONCODE	chr19	coding
TC0300007842.hg.1	-1.73082	0.306245	55096	EBLN2	endogenous Bornavirus-like nucleoprotein 2	NM_018029; ENST00000533473; BC051316; BC064501; OTTHUMT00000386932; CCDS54608.1; uc003dpj.4	RefSeq; ENSEMBL; GenBank; Havana transcript; ccdsGene; UCSC Genes	chr3	coding
TC0500007206.hg.1	-1.73	0.0502591		RICTOR	Memczak2013 ANTISENSE, coding, INTERNAL, intronic best transcript NM_152756	hsa_circ_0001477	circbase	chr5	ncrna
TC1100012948.hg.1	-1.72878	0.00513148	10581	IFITM2	interferon induced transmembrane protein 2	NM_006435; ENST00000399817; ENST00000527146; ENST00000533141; ENST00000602569; ENST00000616316; BC009696; OTTHUMT00000383590; OTTHUMT00000383591; OTTHUMT00000383592; OTTHUMT00000468099; CCDS41583.1; hsa_circ_0020621; hsa_circ_0020622; uc001lox.5; uc057xef.1; uc057xeg.1; uc057xeh.1; uc057xei.1	RefSeq; ENSEMBL; GenBank; Havana transcript; ccdsGene; circbase; UCSC Genes	chr11	coding
TC1000008712.hg.1	-1.72853	0.22924	23082	PPRC1	peroxisome proliferator-activated receptor gamma, coactivator-related 1	NM_001288727; NM_001288728; NM_015062; ENST00000278070; ENST00000370012; ENST00000413464; ENST00000462933; ENST00000489648; ENST00000495914; BC063806; BC063829; OTTHUMT00000050021; OTTHUMT00000050022; OTTHUMT00000050023; OTTHUMT00000050024; OTTHUMT00000050025; CCDS73186.1; CCDS7529.1; hsa_circ_0019674; hsa_circ_0019675; hsa_circ_0019676; hsa_circ_0019677; hsa_circ_0019678; hsa_circ_0019679; hsa_c…	RefSeq; ENSEMBL; GenBank; Havana transcript; ccdsGene; circbase; Ace View; UCSC Genes; Guo; lncRNAWiki; NONCODE	chr10	coding
TC0300014061.hg.1	-1.72537	0.210936	57047	PLSCR2	phospholipid scramblase 2	NM_001199978; NM_001199979; NM_020359; ENST00000336685; ENST00000474418; ENST00000489015; ENST00000497985; ENST00000610787; ENST00000613069; BC069785; BC120969; BC141969; OTTHUMT00000355263; OTTHUMT00000355264; OTTHUMT00000355265; OTTHUMT00000355266; CCDS3134.1; CCDS56284.1; CCDS75029.1; uc003evv.3; uc003evw.3; uc021xfa.2; uc062osr.1; uc062oss.1; uc062ost.1; NONHSAT092558	RefSeq; ENSEMBL; GenBank; Havana transcript; ccdsGene; UCSC Genes; lncRNAWiki; NONCODE	chr3	coding
TC1600010837.hg.1	-1.72513	0.255963	388289	C16orf47	chromosome 16 open reading frame 47	NM_207385; OTTHUMT00000269009; totema.aAug10; uc032eet.2; ENST00000358463; LN608613.1:1..1308:ncRNA	RefSeq; Havana transcript; Ace View; UCSC Genes; ENSEMBL; RNACentral	chr16	coding
TC1900009062.hg.1	-1.72498	0.0158198	10155	TRIM28	tripartite motif containing 28	NM_005762; ENST00000253024; ENST00000341753; ENST00000593582; ENST00000594806; ENST00000595028; ENST00000595974; ENST00000597136; ENST00000597172; ENST00000597423; ENST00000597618; ENST00000597968; ENST00000597995; ENST00000598355; ENST00000600840; ENST00000601150; BC004978; BC052986; OTTHUMT00000467072; OTTHUMT00000467073; OTTHUMT00000467074; OTTHUMT00000467075; OTTHUMT00000467076; OTTHUMT000004…	RefSeq; ENSEMBL; GenBank; Havana transcript; ccdsGene; circbase; UCSC Genes; lncRNAWiki; NONCODE	chr19	coding
TC0500013144.hg.1	-1.72468	0.0610186	55722	CEP72	centrosomal protein 72kDa	NM_018140; ENST00000264935; ENST00000512038; BC000132; OTTHUMT00000365967; OTTHUMT00000367601; CCDS34126.1; hsa_circ_0071649; hsa_circ_0071650; hsa_circ_0071651; hsa_circ_0071652; hsa_circ_0071653; hsa_circ_0071654; hsa_circ_0071655; hsa_circ_0071656; hsa_circ_0071657; hsa_circ_0071658; hsa_circ_0071659; hsa_circ_0071660; hsa_circ_0071661; uc003jbf.4; uc063bww.1; chr5_619104_620376; chr5_619104_6…	RefSeq; ENSEMBL; GenBank; Havana transcript; ccdsGene; circbase; UCSC Genes; Guo	chr5	coding
TC1000011628.hg.1	-1.72467	0.0969602	79955	PDZD7	PDZ domain containing 7	NM_001195263; NM_024895; ENST00000370215; ENST00000433616; ENST00000470414; ENST00000474125; ENST00000476306; ENST00000619208; BC029054; OTTHUMT00000049881; OTTHUMT00000049882; OTTHUMT00000049883; OTTHUMT00000049884; OTTHUMT00000049885; CCDS31269.1; CCDS73182.1; uc001kso.3; uc021pxc.2; uc057vlw.1; uc057vlx.1; uc057vly.1; uc057vlz.1; chr10_102777855_102778974; lnc-PDZD7-1:1; NONHSAT016003; NONHSAT…	RefSeq; ENSEMBL; GenBank; Havana transcript; ccdsGene; UCSC Genes; Guo; lncRNAWiki; NONCODE	chr10	coding
TC0200011130.hg.1	-1.72396	0.0150377	8527	DGKD	diacylglycerol kinase, delta 130kDa	NM_003648; NM_152879; ENST00000264057; ENST00000409813; ENST00000427930; ENST00000430834; ENST00000442524; ENST00000447484; ENST00000465569; ENST00000471764; ENST00000472732; ENST00000474488; ENST00000480535; ENST00000489613; ENST00000490764; ENST00000495901; ENST00000622717; OTTHUMT00000257072; OTTHUMT00000317152; OTTHUMT00000317153; OTTHUMT00000317154; OTTHUMT00000317155; OTTHUMT00000317156; OT…	RefSeq; ENSEMBL; Havana transcript; ccdsGene; Ace View; lncRNAWiki; circbase; UCSC Genes; Guo; NONCODE	chr2	coding
TC2000008379.hg.1	-1.72393	0.272168	8195	MKKS	McKusick-Kaufman syndrome	NM_018848; NM_170784; NR_072977; ENST00000347364; ENST00000399054; ENST00000609375; BC028973; OTTHUMT00000077991; OTTHUMT00000077992; OTTHUMT00000472492; CCDS13111.1; uc002wnt.3; uc002wnu.3; uc061vjn.1; lnc-MKKS-1:1; NONHSAT078594; NONHSAT078595; NONHSAT078596; NONHSAT078597	RefSeq; ENSEMBL; GenBank; Havana transcript; ccdsGene; UCSC Genes; lncRNAWiki; NONCODE	chr20	coding
TC0900009859.hg.1	-1.72261	0.310931	364	AQP7	aquaporin 7	NM_001170; ENST00000297988; ENST00000377425; ENST00000379503; ENST00000379506; ENST00000379507; ENST00000439678; ENST00000447660; ENST00000537089; ENST00000623097; ENST00000623519; ENST00000623743; ENST00000624005; ENST00000624075; ENST00000624095; ENST00000624420; ENST00000624432; ENST00000624890; ENST00000625032; ENST00000625109; BC062701; OTTHUMT00000052075; OTTHUMT00000052077; OTTHUMT00000052…	RefSeq; ENSEMBL; GenBank; Havana transcript; UCSC Genes; Ace View; ccdsGene	chr9	coding
TC1700006721.hg.1	-1.72226	0.0469192	201232	SLC16A13	solute carrier family 16, member 13	NM_201566; ENST00000308027; ENST00000575844; BC142618; OTTHUMT00000219923; OTTHUMT00000439453; uc002geh.3; CCDS11085.1; uc060aho.1; NONHSAT145331	RefSeq; ENSEMBL; GenBank; Havana transcript; UCSC Genes; ccdsGene; lncRNAWiki; NONCODE	chr17	coding
TC0200008469.hg.1	-1.72161	0.123655		FAHD2A	Transcript Identified by AceView, Entrez Gene ID(s) 51011	FAHD2A.jAug10-unspliced	Ace View	chr2	ncrna
TSUnmapped00000648.hg.1	-1.72155	0.116216	6295	SAG	S-antigen; retina and pineal gland (arrestin)	ENST00000630486	ENSEMBL		coding
TC0400008450.hg.1	-1.72103	0.151476	287	ANK2	ankyrin 2, neuronal	NM_001127493; NM_001148; NM_020977; ENST00000264366; ENST00000357077; ENST00000394537; ENST00000502701; ENST00000503271; ENST00000503423; ENST00000504415; ENST00000504454; ENST00000504887; ENST00000505342; ENST00000506344; ENST00000506722; ENST00000508007; ENST00000508613; ENST00000509550; ENST00000510275; ENST00000511380; ENST00000512298; ENST00000512999; ENST00000514160; ENST00000514167; ENST00…	RefSeq; ENSEMBL; Havana transcript; Ace View; ccdsGene; circbase; UCSC Genes; lncRNAWiki; NONCODE	chr4	coding
TC0800009828.hg.1	-1.72094	0.20481	55806	HR	hair growth associated	NM_005144; NM_018411; ENST00000312841; ENST00000381418; ENST00000517699; ENST00000518377; ENST00000518461; ENST00000519619; ENST00000522016; ENST00000522039; ENST00000522759; BC067128; OTTHUMT00000214213; OTTHUMT00000375340; OTTHUMT00000375341; OTTHUMT00000375343; OTTHUMT00000375344; OTTHUMT00000375345; OTTHUMT00000375346; OTTHUMT00000375347; OTTHUMT00000375348; uc003xat.3; CCDS6022.1; CCDS6023.1…	RefSeq; ENSEMBL; GenBank; Havana transcript; UCSC Genes; ccdsGene; circbase; lncRNAWiki; NONCODE	chr8	coding
TC1900008925.hg.1	-1.72023	0.0652129		U2AF2	Memczak2013 ALT_ACCEPTOR, ALT_DONOR, coding, INTERNAL, intronic best transcript NM_001012478	hsa_circ_0000961	circbase	chr19	ncrna
TC1400009926.hg.1	-1.72013	0.0327952		EML5	Transcript Identified by AceView, Entrez Gene ID(s) 161436	EML5.lAug10-unspliced	Ace View	chr14	ncrna
TC0200013071.hg.1	-1.71963	0.78866	9027	NAT8	N-acetyltransferase 8 (GCN5-related, putative)	NM_003960; ENST00000272425; BC012626; OTTHUMT00000327854; CCDS1926.1; uc002sji.2	RefSeq; ENSEMBL; GenBank; Havana transcript; ccdsGene; UCSC Genes	chr2	coding
TC0700013616.hg.1	-1.71947	0.601949	79571	GCC1	GRIP and coiled-coil domain containing 1	NM_024523; ENST00000321407; BC014100; BC078665; OTTHUMT00000059911; CCDS5796.1; hsa_circ_0082100; uc003vma.4	RefSeq; ENSEMBL; GenBank; Havana transcript; ccdsGene; circbase; UCSC Genes	chr7	coding
TC0100018156.hg.1	-1.71877	0.0512114	83858	ATAD3B	ATPase family, AAA domain containing 3B	NM_031921; ENST00000308647; ENST00000378736; ENST00000472194; ENST00000474481; ENST00000485748; BC002542; BC018701; OTTHUMT00000001369; OTTHUMT00000001370; OTTHUMT00000001371; OTTHUMT00000001372; OTTHUMT00000472704; CCDS30.1; hsa_circ_0008398; hsa_circ_0009276; hsa_circ_0009277; hsa_circ_0009278; hsa_circ_0009279; hsa_circ_0009280; hsa_circ_0009281; hsa_circ_0009282; hsa_circ_0009283; hsa_circ_00…	RefSeq; ENSEMBL; GenBank; Havana transcript; ccdsGene; circbase; UCSC Genes	chr1	coding
TC1800007523.hg.1	-1.71773	0.107703	23239	PHLPP1	PH domain and leucine rich repeat protein phosphatase 1	NM_194449; ENST00000262719; ENST00000487409; ENST00000497351; ENST00000588452; ENST00000588953; ENST00000591106; ENST00000591386; BC014927; BC126277; OTTHUMT00000319249; OTTHUMT00000319250; OTTHUMT00000319251; OTTHUMT00000450095; OTTHUMT00000450096; OTTHUMT00000450097; OTTHUMT00000450098; CCDS45881.2; hsa_circ_0047890; hsa_circ_0047891; hsa_circ_0047892; hsa_circ_0047893; hsa_circ_0047894; hsa_ci…	RefSeq; ENSEMBL; GenBank; Havana transcript; ccdsGene; circbase; Ace View; UCSC Genes; lncRNAWiki; NONCODE	chr18	coding
TC0900006522.hg.1	-1.71752	0.0893548	6505	SLC1A1	solute carrier family 1 (neuronal/epithelial high affinity glutamate transporter, system Xag), member 1	NM_004170; ENST00000262352; ENST00000422398; ENST00000490167; BC033040; OTTHUMT00000051571; OTTHUMT00000051572; OTTHUMT00000051573; CCDS6452.1; hsa_circ_0086249; uc003zij.3; uc064ryh.1; uc064ryi.1; NONHSAT130061	RefSeq; ENSEMBL; GenBank; Havana transcript; ccdsGene; circbase; UCSC Genes; lncRNAWiki; NONCODE	chr9	coding
TC1900006475.hg.1	-1.71707	0.277453	27006	FGF22	fibroblast growth factor 22	NM_001300812; NM_020637; ENST00000215530; ENST00000586042; ENST00000591390; BC137444; BC137445; OTTHUMT00000452101; OTTHUMT00000452102; OTTHUMT00000452103; CCDS12037.1; CCDS74241.1; FGF22.cAug10; uc010xfq.3; uc010xfr.2; uc060qps.1; NONHSAT060153	RefSeq; ENSEMBL; GenBank; Havana transcript; ccdsGene; Ace View; UCSC Genes; lncRNAWiki; NONCODE	chr19	coding
TC0800008122.hg.1	-1.71665	0.120701	1875	E2F5	E2F transcription factor 5, p130-binding	NM_001083588; NM_001083589; NM_001951; ENST00000256117; ENST00000416274; ENST00000418930; ENST00000517476; ENST00000518234; ENST00000520225; ENST00000521234; ENST00000521429; OTTHUMT00000380273; OTTHUMT00000380274; OTTHUMT00000380275; OTTHUMT00000380276; OTTHUMT00000380277; OTTHUMT00000381049; OTTHUMT00000381050; OTTHUMT00000381051; BC172475; CCDS47885.1; CCDS47886.1; CCDS55254.1; E2F5.gAug10; hs…	RefSeq; ENSEMBL; Havana transcript; GenBank; ccdsGene; Ace View; circbase; UCSC Genes	chr8	coding
TC0700012044.hg.1	-1.71631	0.0596472	51024	FIS1	fission, mitochondrial 1	NM_016068; ENST00000223136; ENST00000435848; ENST00000442303; ENST00000449367; ENST00000463406; ENST00000473527; ENST00000474120; ENST00000480497; ENST00000482199; BC003540; BC009428; OTTHUMT00000347449; OTTHUMT00000347450; OTTHUMT00000347451; OTTHUMT00000347452; OTTHUMT00000347453; OTTHUMT00000347454; OTTHUMT00000347455; OTTHUMT00000347456; OTTHUMT00000347457; CCDS43626.1; hsa_circ_0081594; hsa_…	RefSeq; ENSEMBL; GenBank; Havana transcript; ccdsGene; circbase; UCSC Genes; lncRNAWiki; NONCODE	chr7	coding
TC0700011571.hg.1	-1.71616	0.110749		YWHAG	Memczak2013 ALT_ACCEPTOR, ALT_DONOR, coding, INTERNAL, intronic best transcript NM_012479	hsa_circ_0001719; chr7_75976612_75980151	circbase; Guo	chr7	ncrna
TC0200010473.hg.1	-1.71599	0.663484	8324	FZD7	frizzled class receptor 7	NM_003507; ENST00000286201; BC015915; OTTHUMT00000256314; CCDS2351.1; FZD7.aAug10-unspliced; uc002uyw.2	RefSeq; ENSEMBL; GenBank; Havana transcript; ccdsGene; Ace View; UCSC Genes	chr2	coding
TC0300013068.hg.1	-1.71592	0.0845871	2122	MECOM	MDS1 and EVI1 complex locus	NM_001105077; NM_001105078; NM_001163999; NM_001164000; NM_001205194; NM_004991; NM_005241; ENST00000264674; ENST00000433243; ENST00000460814; ENST00000460890; ENST00000461430; ENST00000464456; ENST00000466623; ENST00000468789; ENST00000472280; ENST00000475754; ENST00000481315; ENST00000484519; ENST00000485957; ENST00000486748; ENST00000487503; ENST00000492586; ENST00000494292; ENST00000494597; E…	RefSeq; ENSEMBL; GenBank; Havana transcript; UCSC Genes; ccdsGene; circbase; Ace View; lncRNAWiki; NONCODE	chr3	coding
TC1200012700.hg.1	-1.71585	0.0620215	387882	C12orf75	chromosome 12 open reading frame 75	NM_001145199; ENST00000443585; ENST00000546866; ENST00000548336; ENST00000548458; ENST00000549934; ENST00000552457; ENST00000612117; BC013920; BC045812; BC061920; BC067897; BC126980; BC127012; OTTHUMT00000316459; OTTHUMT00000406306; OTTHUMT00000406668; OTTHUMT00000406669; OTTHUMT00000406670; OTTHUMT00000406671; uc001tlh.4; CCDS55879.1; hsa_circ_0028002; hsa_circ_0028003; hsa_circ_0028004; hsa_cir…	RefSeq; ENSEMBL; GenBank; Havana transcript; UCSC Genes; ccdsGene; circbase; lncRNAWiki; NONCODE	chr12	coding
TC1700012120.hg.1	-1.71579	0.226556	79701	OGFOD3	2-oxoglutarate and iron-dependent oxygenase domain containing 3	NM_024648; NM_175902; NR_033265; ENST00000313056; ENST00000329197; ENST00000577495; ENST00000577606; ENST00000578287; ENST00000578586; ENST00000579407; ENST00000580445; ENST00000582146; ENST00000582593; ENST00000583445; ENST00000583897; BC008897; BC023602; C17orf101.dAug10; C17orf101.gAug10; CCDS11811.1; CCDS11812.1; hsa_circ_0000815; hsa_circ_0046401; hsa_circ_0046402; hsa_circ_0046403; hsa_circ…	RefSeq; ENSEMBL; GenBank; Ace View; ccdsGene; circbase; UCSC Genes; lncRNAWiki; NONCODE; Havana transcript	chr17	coding
TC0500006663.hg.1	-1.71517	0.0236292		ADCY2	Transcript Identified by AceView, Entrez Gene ID(s) 108	ADCY2.lAug10-unspliced	Ace View	chr5	ncrna
TC1600008169.hg.1	-1.71515	0.122627	50855	PARD6A	par-6 family cell polarity regulator alpha	NM_001037281; NM_016948; ENST00000219255; ENST00000458121; ENST00000602551; ENST00000602727; BC015626; OTTHUMT00000268863; OTTHUMT00000467880; OTTHUMT00000467881; OTTHUMT00000467882; uc002ets.3; CCDS10843.1; CCDS45514.1; PARD6A.dAug10; uc002ett.4; uc059vwy.1; uc059vwz.1	RefSeq; ENSEMBL; GenBank; Havana transcript; UCSC Genes; ccdsGene; Ace View	chr16	coding
TSUnmapped00000098.hg.1	-1.71366	0.00534339	8527	DGKD	diacylglycerol kinase, delta 130kDa	ENST00000625865	ENSEMBL		coding
TC2100008462.hg.1	-1.71311	0.104174	4047	LSS	lanosterol synthase (2,3-oxidosqualene-lanosterol cyclase)	NM_001001438; NM_001145436; NM_001145437; NM_002340; ENST00000356396; ENST00000397728; ENST00000419093; ENST00000450351; ENST00000457828; ENST00000464357; ENST00000472272; ENST00000474319; ENST00000484808; ENST00000491729; ENST00000522411; BC035638; OTTHUMT00000207273; OTTHUMT00000207274; OTTHUMT00000207275; OTTHUMT00000207276; OTTHUMT00000207277; OTTHUMT00000207278; OTTHUMT00000207279; OTTHUMT00…	RefSeq; ENSEMBL; GenBank; Havana transcript; UCSC Genes; ccdsGene; circbase; Ace View; lncRNAWiki; NONCODE	chr21	coding
TC0300006437.hg.1	-1.71254	0.0309167	10752	CHL1	cell adhesion molecule L1-like	NM_001253387; NM_001253388; NM_006614; NR_045572; ENST00000256509; ENST00000397491; ENST00000421198; ENST00000427688; ENST00000435603; ENST00000445697; ENST00000449294; ENST00000453040; ENST00000461289; ENST00000470005; ENST00000470880; ENST00000471332; ENST00000481167; ENST00000486881; ENST00000489224; ENST00000620033; BC104918; BC143496; OTTHUMT00000207155; OTTHUMT00000337365; OTTHUMT0000033736…	RefSeq; ENSEMBL; GenBank; Havana transcript; ccdsGene; Ace View; UCSC Genes; lncRNAWiki; NONCODE	chr3	coding
TC1200009197.hg.1	-1.71119	0.268234		MLXIP	Memczak2013 ALT_ACCEPTOR, ALT_DONOR, coding, INTERNAL, intronic best transcript NM_014938	hsa_circ_0000454	circbase	chr12	ncrna
TC0300014095.hg.1	-1.7111	0.12094	116211	TM4SF19	transmembrane 4 L six family member 19	NM_001204897; NM_001204898; NM_138461; ENST00000273695; ENST00000440822; ENST00000446879; ENST00000454715; BC146985; BC146993; BC147021; BC171870; OTTHUMT00000341174; OTTHUMT00000341175; OTTHUMT00000341177; OTTHUMT00000341178; CCDS3316.1; CCDS56299.1; hsa_circ_0068641; uc003fwl.3; uc010iad.3; uc011btv.3; uc062sbf.1	RefSeq; ENSEMBL; GenBank; Havana transcript; ccdsGene; circbase; UCSC Genes	chr3	coding
TC1900009822.hg.1	-1.71079	0.121849	5731	PTGER1	prostaglandin E receptor 1	NM_000955; ENST00000292513; BC039034; BC051286; uc002mys.3; CCDS12309.1; OTTHUMT00000095509	RefSeq; ENSEMBL; GenBank; UCSC Genes; ccdsGene; Havana transcript	chr19	coding
TC2200006908.hg.1	-1.71057	0.752615	85379	KIAA1671	KIAA1671	NM_001145206; ENST00000358431; ENST00000401395; ENST00000406486; ENST00000461374; ENST00000494730; BC171801; OTTHUMT00000320305; OTTHUMT00000320306; OTTHUMT00000320307; OTTHUMT00000320484; CCDS46676.1; hsa_circ_0062630; hsa_circ_0062631; uc003abl.4; uc003abn.4; uc062clx.1; uc062cma.1; uc062cmb.1; NONHSAT084395	RefSeq; ENSEMBL; GenBank; Havana transcript; ccdsGene; circbase; UCSC Genes; lncRNAWiki	chr22	coding
TC1200006909.hg.1	-1.71028	0.0435405	2012	EMP1	epithelial membrane protein 1	NM_001423; ENST00000256951; ENST00000396301; ENST00000431267; ENST00000535134; ENST00000536383; ENST00000537612; ENST00000538364; ENST00000541935; ENST00000542289; ENST00000542474; ENST00000544053; ENST00000546357; BC047300; OTTHUMT00000401019; OTTHUMT00000401020; OTTHUMT00000401021; OTTHUMT00000401022; OTTHUMT00000401024; OTTHUMT00000401025; OTTHUMT00000401064; OTTHUMT00000401065; OTTHUMT0000040…	RefSeq; ENSEMBL; GenBank; Havana transcript; ccdsGene; Ace View; UCSC Genes; lncRNAWiki; NONCODE	chr12	coding
TC0900010589.hg.1	-1.70999	0.153041		HNRNPK	Zhang2013 ALT_ACCEPTOR, ALT_DONOR, coding, INTERNAL, intronic, OVERLAPTX best transcript NM_002140	hsa_circ_0092347	circbase	chr9	ncrna
TC0100010689.hg.1	-1.70971	0.0970442	63923	TNN	tenascin N	NM_022093; ENST00000239462; ENST00000621086; ENST00000622870; BC136619; BC144305; OTTHUMT00000084422; uc001gkl.1; CCDS30943.1; uc057nmi.1; uc057nmj.1	RefSeq; ENSEMBL; GenBank; Havana transcript; UCSC Genes; ccdsGene	chr1	coding
TC1100013071.hg.1	-1.70909	0.0121161	10714	POLD3	polymerase (DNA-directed), delta 3, accessory subunit	NM_006591; NR_046409; NR_046410; ENST00000263681; ENST00000524752; ENST00000527458; ENST00000530163; ENST00000530511; ENST00000531615; ENST00000532497; ENST00000532784; ENST00000532954; BC108908; BC108909; OTTHUMT00000385376; OTTHUMT00000385377; OTTHUMT00000385378; OTTHUMT00000385379; OTTHUMT00000385380; OTTHUMT00000385381; OTTHUMT00000385382; OTTHUMT00000385383; OTTHUMT00000385384; CCDS8233.1; h…	RefSeq; ENSEMBL; GenBank; Havana transcript; ccdsGene; circbase; Ace View; UCSC Genes; lncRNAWiki; NONCODE	chr11	coding
TC1200007654.hg.1	-1.70872	0.353322	60673	ATG101	autophagy related 101	NM_001098673; NM_021934; ENST00000336854; ENST00000547409; ENST00000548915; ENST00000550604; ENST00000552544; ENST00000552947; ENST00000553049; BC005151; BC009937; OTTHUMT00000405062; OTTHUMT00000405063; OTTHUMT00000405064; OTTHUMT00000405065; OTTHUMT00000405066; OTTHUMT00000405067; OTTHUMT00000405068; C12orf44.fAug10; C12orf44.gAug10; CCDS8820.1; uc001rzu.5; uc058ofw.1; uc058ofx.1; uc058ofy.1; u…	RefSeq; ENSEMBL; GenBank; Havana transcript; Ace View; ccdsGene; UCSC Genes; lncRNAWiki; NONCODE	chr12	coding
TC0100016185.hg.1	-1.70736	0.102814	2214	FCGR3A	Fc fragment of IgG, low affinity IIIa, receptor (CD16a)	NM_000569; NM_001127592; NM_001127593; NM_001127595; NM_001127596; ENST00000367967; ENST00000367969; ENST00000426740; ENST00000436743; ENST00000442336; ENST00000443193; ENST00000476031; BC017865; BC033678; BC036723; OTTHUMT00000083313; OTTHUMT00000083314; OTTHUMT00000102169; OTTHUMT00000315967; OTTHUMT00000315968; CCDS1232.1; CCDS44266.1; uc001gar.4; uc001gat.5; uc009wui.4; uc057msl.1; uc057msm.1…	RefSeq; ENSEMBL; GenBank; Havana transcript; ccdsGene; UCSC Genes	chr1	coding
TC1800008614.hg.1	-1.70721	0.166794	652991	SKOR2	SKI family transcriptional corepressor 2	NM_001037802; NM_001278063; ENST00000400404; ENST00000425639; ENST00000620245; OTTHUMT00000450685; OTTHUMT00000450686; uc010dnt.2; CCDS62441.1; CCDS74222.1; SKOR2.aAug10; uc031rif.1; uc060oxr.1	RefSeq; ENSEMBL; Havana transcript; UCSC Genes; ccdsGene; Ace View	chr18	coding
TSUnmapped00000449.hg.1	-1.70666	0.0681592	8527	DGKD	diacylglycerol kinase, delta 130kDa	ENST00000629742	ENSEMBL		coding
TC1000008574.hg.1	-1.70555	0.00843402	5223	PGAM1	phosphoglycerate mutase 1 (brain)	NM_002629; ENST00000334828; ENST00000467867; ENST00000473929; BC000455; BC010038; BC011678; BC053356; BC062302; BC066959; BC073742; BC157873; OTTHUMT00000049652; OTTHUMT00000049654; OTTHUMT00000049655; CCDS7458.1; hsa_circ_0019339; hsa_circ_0019340; hsa_circ_0019341; PGAM1.eAug10; uc001knh.4; uc057vel.1; uc057vem.1; NONHSAT015866	RefSeq; ENSEMBL; GenBank; Havana transcript; ccdsGene; circbase; Ace View; UCSC Genes; lncRNAWiki; NONCODE	chr10	coding
TC1300008084.hg.1	-1.70435	0.127926	23250	ATP11A	ATPase, class VI, type 11A	NM_015205; NM_032189; ENST00000375630; ENST00000375645; ENST00000415301; ENST00000418678; ENST00000419631; ENST00000459011; ENST00000459908; ENST00000466946; ENST00000471555; ENST00000479193; ENST00000487903; ENST00000489577; ENST00000493489; ENST00000495930; ENST00000610419; ENST00000614170; OTTHUMT00000045834; OTTHUMT00000126516; OTTHUMT00000126517; OTTHUMT00000126518; OTTHUMT00000126519; OTTHU…	RefSeq; ENSEMBL; Havana transcript; UCSC Genes; Ace View; GenBank; ccdsGene; circbase; lncRNAWiki; NONCODE	chr13	coding
TSUnmapped00000361.hg.1	-1.70416	0.0156896	22821	RASA3	RAS p21 protein activator 3	ENST00000628197	ENSEMBL		coding
TC1100010398.hg.1	-1.70395	0.0368115		CCDC34	Transcript Identified by AceView, Entrez Gene ID(s) 91057	CCDC34.eAug10-unspliced	Ace View	chr11	ncrna
TC1900009807.hg.1	-1.70301	0.00125199	55723	ASF1B	anti-silencing function 1B histone chaperone	NM_018154; ENST00000263382; ENST00000474890; ENST00000589468; ENST00000590835; ENST00000592798; BC007726; BC010014; BC036521; OTTHUMT00000317946; OTTHUMT00000317947; OTTHUMT00000459693; OTTHUMT00000459694; OTTHUMT00000459695; ASF1B.aAug10; CCDS12306.1; hsa_circ_0049720; hsa_circ_0049721; hsa_circ_0049722; uc002mye.4; uc060umb.1; uc060umc.1; uc060umd.1; uc060ume.1	RefSeq; ENSEMBL; GenBank; Havana transcript; Ace View; ccdsGene; circbase; UCSC Genes	chr19	coding
TC0100011192.hg.1	-1.70289	0.0529785	55705	IPO9	importin 9	NM_018085; ENST00000361565; ENST00000456707; ENST00000464348; ENST00000479374; OTTHUMT00000087088; OTTHUMT00000087089; OTTHUMT00000087090; OTTHUMT00000087091; CCDS1415.1; hsa_circ_0003008; hsa_circ_0003115; hsa_circ_0015912; hsa_circ_0015913; hsa_circ_0015914; hsa_circ_0015915; hsa_circ_0015916; hsa_circ_0015917; hsa_circ_0015918; hsa_circ_0015919; hsa_circ_0015920; hsa_circ_0015921; hsa_circ_001…	RefSeq; ENSEMBL; Havana transcript; ccdsGene; circbase; UCSC Genes; Guo	chr1	coding
TC2100007114.hg.1	-1.70283	0.187059	259234	DSCR10	Down syndrome critical region 10 (non-protein coding)	NR_027695; ENST00000432141; ENST00000538415; BC093855; uc010gnt.2; DSCR10.aAug10; ENST00000432141.1; ENST00000538415.1; OTTHUMT00000207199; uc062abq.1; HG511804.1:1..860:ncRNA; NONHSAT082079; NONHSAT082080	RefSeq; ENSEMBL; GenBank; UCSC Genes; Ace View; lncRNAWiki; Havana transcript; RNACentral; NONCODE	chr21	ncrna
TC0200007609.hg.1	-1.70161	0.0103402	6711	SPTBN1	spectrin, beta, non-erythrocytic 1	NM_003128; NM_178313; ENST00000333896; ENST00000356805; ENST00000389980; ENST00000467371; ENST00000496323; ENST00000602898; ENST00000615901; BC137282; BC137283; uc002rxx.3; CCDS33198.1; CCDS33199.1; hsa_circ_0054558; hsa_circ_0054559; hsa_circ_0054560; hsa_circ_0054561; hsa_circ_0054562; hsa_circ_0054563; hsa_circ_0054564; hsa_circ_0054565; hsa_circ_0054566; hsa_circ_0054567; hsa_circ_0054568; hs…	RefSeq; ENSEMBL; GenBank; UCSC Genes; ccdsGene; circbase; lncRNAWiki; NONCODE; Havana transcript	chr2	coding
TC0X00008830.hg.1	-1.70151	0.0416581	6901	TAZ	tafazzin	NM_000116; NM_001303465; NM_181311; NM_181312; NM_181313; NR_024048; ENST00000369776; ENST00000426231; ENST00000439735; ENST00000470127; ENST00000475699; ENST00000476679; ENST00000476800; ENST00000479875; ENST00000483674; ENST00000483780; ENST00000494912; ENST00000498029; ENST00000601016; ENST00000612012; ENST00000612460; ENST00000613002; ENST00000613634; ENST00000614595; ENST00000615658; ENST000…	RefSeq; ENSEMBL; GenBank; Havana transcript; ccdsGene; circbase; Ace View; UCSC Genes; lncRNAWiki; NONCODE	chrX	coding
TC1600011324.hg.1	-1.70129	0.0448351	84264	HAGHL	hydroxyacylglutathione hydrolase-like	ENST00000569604; OTTHUMT00000441116; uc059orj.1; lnc-HAGHL-1:1; NONHSAT051872	ENSEMBL; Havana transcript; UCSC Genes; lncRNAWiki; NONCODE	chr16	coding
TC1700007702.hg.1	-1.70127	0.0683351	30837	SOCS7	suppressor of cytokine signaling 7	NM_014598; ENST00000612932; ENST00000613678; ENST00000617360; ENST00000617765; OTTHUMT00000477588; OTTHUMT00000477589; OTTHUMT00000477590; OTTHUMT00000477591; BC167822; CCDS32637.1; hsa_circ_0005693; hsa_circ_0043326; hsa_circ_0043327; hsa_circ_0043328; hsa_circ_0043329; hsa_circ_0043330; hsa_circ_0043331; hsa_circ_0043332; hsa_circ_0043333; uc002hqa.4; uc002hqb.4; uc010cvl.4; uc060elv.1; chr17_3…	RefSeq; ENSEMBL; Havana transcript; GenBank; ccdsGene; circbase; UCSC Genes; Guo	chr17	coding
TC2200008655.hg.1	-1.70077	0.0120502	29775	CARD10	caspase recruitment domain family, member 10	NM_014550; ENST00000251973; ENST00000403299; ENST00000406271; ENST00000433485; ENST00000437756; ENST00000467812; ENST00000476871; ENST00000486118; ENST00000488141; ENST00000494166; BC113659; BC117403; OTTHUMT00000318997; OTTHUMT00000318998; OTTHUMT00000318999; OTTHUMT00000319000; OTTHUMT00000319001; OTTHUMT00000319002; OTTHUMT00000319003; OTTHUMT00000319004; OTTHUMT00000319005; OTTHUMT00000319006…	RefSeq; ENSEMBL; GenBank; Havana transcript; Ace View; ccdsGene; circbase; UCSC Genes; lncRNAWiki; NONCODE	chr22	coding
TC1800007066.hg.1	-1.70013	0.014191	10982	MAPRE2	microtubule-associated protein, RP/EB family, member 2	NM_001143826; NM_001143827; NM_001256420; NM_014268; NR_046177; ENST00000300249; ENST00000413393; ENST00000436190; ENST00000538170; ENST00000585592; ENST00000587359; ENST00000588085; ENST00000588349; ENST00000588910; ENST00000589180; ENST00000589699; ENST00000590793; ENST00000591734; BC007318; OTTHUMT00000255753; OTTHUMT00000442237; OTTHUMT00000442239; OTTHUMT00000442240; OTTHUMT00000442241; OTTH…	RefSeq; ENSEMBL; GenBank; Havana transcript; ccdsGene; circbase; Ace View; UCSC Genes; lncRNAWiki; NONCODE	chr18	coding
TC2100008562.hg.1	-1.69958	0.0703483	861	RUNX1	runt-related transcription factor 1	NM_001001890; NM_001122607; NM_001754; BC136380; BC136381; BC144053; OTTHUMT00000194230; OTTHUMT00000194231; OTTHUMT00000194232; OTTHUMT00000194233; OTTHUMT00000194234; OTTHUMT00000194235; OTTHUMT00000194236; OTTHUMT00000194237; OTTHUMT00000194238; OTTHUMT00000194239; OTTHUMT00000194241; OTTHUMT00000194407; uc002yuh.3; uc010gmv.3; byklee.aAug10; CCDS13639.1; CCDS42922.1; CCDS46646.1; hsa_circ_000…	RefSeq; GenBank; Havana transcript; UCSC Genes; Ace View; ccdsGene; circbase; ENSEMBL; Guo; lncRNAWiki; NONCODE	chr21	coding
TC0300009324.hg.1	-1.69948	0.0208185	654502; 29970; 100505385	IQCJ; SCHIP1; IQCJ-SCHIP1	IQ motif containing J; schwannomin interacting protein 1; IQCJ-SCHIP1 readthrough	NM_001042705; NM_001042706; NM_001197100; NM_001197107; NM_001197108; NM_001197109; NM_001197113; NM_001197114; NM_014575; ENST00000397832; ENST00000445224; ENST00000451172; ENST00000461058; ENST00000472483; ENST00000475932; ENST00000481796; ENST00000482126; ENST00000482804; ENST00000482885; ENST00000483730; ENST00000495954; BC005947; BC036535; BC137464; BC137469; BC144658; OTTHUMT00000352395; OT…	RefSeq; ENSEMBL; GenBank; Havana transcript; ccdsGene; circbase; Ace View; UCSC Genes; Guo; lncRNAWiki; NONCODE	chr3	coding
TC0600011927.hg.1	-1.69934	0.0724013	8464	SUPT3H	SPT3 homolog, SAGA and STAGA complex component	NM_001261823; NM_003599; NM_181356; ENST00000306867; ENST00000371458; ENST00000371459; ENST00000371460; ENST00000459689; ENST00000475057; BC050384; OTTHUMT00000040749; OTTHUMT00000040751; OTTHUMT00000040752; OTTHUMT00000106910; OTTHUMT00000106911; CCDS34465.1; CCDS34466.1; CCDS75464.1; hsa_circ_0003724; hsa_circ_0005112; hsa_circ_0076679; hsa_circ_0076680; hsa_circ_0076681; hsa_circ_0076682; hsa_…	RefSeq; ENSEMBL; GenBank; Havana transcript; ccdsGene; circbase; UCSC Genes; lncRNAWiki; NONCODE	chr6	coding
TC0100010259.hg.1	-1.69931	0.0984956	325	APCS	amyloid P component, serum	NM_001639; ENST00000255040; BC007039; BC007058; OTTHUMT00000059024; CCDS1186.1; uc001ftv.4	RefSeq; ENSEMBL; GenBank; Havana transcript; ccdsGene; UCSC Genes	chr1	coding
TC0100008978.hg.1	-1.69838	0.0604261	23507	LRRC8B	leucine rich repeat containing 8 family, member B	NM_001134476; NM_015350; ENST00000330947; ENST00000358200; ENST00000439853; ENST00000449440; BC030607; BC060782; OTTHUMT00000028008; OTTHUMT00000097363; CCDS724.1; hsa_circ_0013117; hsa_circ_0013118; hsa_circ_0013119; uc057ien.1; uc057ieo.1; uc057iep.1; uc057ieq.1; lnc-LRRC8C-2:1; NONHSAT004358	RefSeq; ENSEMBL; GenBank; Havana transcript; ccdsGene; circbase; UCSC Genes; lncRNAWiki; NONCODE	chr1	coding
TC1000008431.hg.1	-1.69835	0.0152992	84333	PCGF5	polycomb group ring finger 5	NM_001256549; NM_001257101; NM_032373; NR_046310; NR_046435; ENST00000336126; ENST00000490164; ENST00000496708; ENST00000543648; ENST00000614189; BC051845; OTTHUMT00000049363; OTTHUMT00000049364; OTTHUMT00000049365; CCDS7413.1; hsa_circ_0019091; hsa_circ_0019092; hsa_circ_0019093; hsa_circ_0019094; hsa_circ_0019095; hsa_circ_0019096; hsa_circ_0019097; uc001khh.5; uc001khi.5; uc010qnk.4; uc031pwu.…	RefSeq; ENSEMBL; GenBank; Havana transcript; ccdsGene; circbase; UCSC Genes; lncRNAWiki; NONCODE	chr10	coding
TC1900006727.hg.1	-1.69807	0.0228469	29128	UHRF1	ubiquitin-like with PHD and ring finger domains 1	NM_001048201; NM_001290050; NM_001290051; NM_001290052; NM_013282; ENST00000612630; ENST00000613817; ENST00000615884; ENST00000616255; ENST00000620565; ENST00000622802; ENST00000624301; BC113875; OTTHUMT00000450444; OTTHUMT00000450445; OTTHUMT00000450446; OTTHUMT00000450447; OTTHUMT00000450448; OTTHUMT00000450449; CCDS74262.1; CCDS74263.1; ENST00000262952.6; ENST00000398240.2; ENST00000543616.1; …	RefSeq; ENSEMBL; GenBank; Havana transcript; ccdsGene; lncRNAWiki; circbase; UCSC Genes; Ace View; Guo	chr19	coding
TC0700009693.hg.1	-1.69799	0.0284439	116988	AGAP3	ArfGAP with GTPase domain, ankyrin repeat and PH domain 3	NM_001042535; NM_001281300; NM_001308304; NM_001308305; NM_031946; ENST00000335367; ENST00000397238; ENST00000461065; ENST00000463179; ENST00000463381; ENST00000467250; ENST00000467724; ENST00000468796; ENST00000469901; ENST00000473140; ENST00000473312; ENST00000473633; ENST00000475145; ENST00000476375; ENST00000478320; ENST00000479901; ENST00000480106; ENST00000483971; ENST00000485904; ENST00000…	RefSeq; ENSEMBL; GenBank; Havana transcript; UCSC Genes; Ace View; ccdsGene; circbase; Guo; lncRNAWiki; NONCODE	chr7	coding
TC1700010214.hg.1	-1.69757	0.200779	55731	FAM222B	family with sequence similarity 222, member B	NM_001077498; NM_001288631; NM_001288632; NM_001288633; NM_001288634; NM_001288635; NM_001288636; NM_001288637; NM_001288638; NM_001288639; NM_001288640; NM_018182; ENST00000341217; ENST00000452648; ENST00000577376; ENST00000577513; ENST00000577682; ENST00000579381; ENST00000581229; ENST00000581381; ENST00000581407; ENST00000582059; ENST00000582266; ENST00000583307; ENST00000583522; ENST000005839…	RefSeq; ENSEMBL; GenBank; Ace View; ccdsGene; circbase; UCSC Genes; Havana transcript	chr17	coding
TC0100007669.hg.1	-1.69736	0.31482	79140	CCDC28B	coiled-coil domain containing 28B	NM_001301011; NM_024296; ENST00000373602; ENST00000421922; ENST00000461819; ENST00000469003; ENST00000483009; BC022848; OTTHUMT00000015722; OTTHUMT00000015723; OTTHUMT00000015724; OTTHUMT00000015728; OTTHUMT00000313451; CCDS354.2; CCDS72749.1; uc001bul.2; uc057eir.1; uc057eis.1; uc057eit.1; uc057eiu.1; NONHSAT002167	RefSeq; ENSEMBL; GenBank; Havana transcript; ccdsGene; UCSC Genes; lncRNAWiki; NONCODE	chr1	coding
TC0400006988.hg.1	-1.69722	0.512039		LAP3	Transcript Identified by AceView, Entrez Gene ID(s) 51056	LAP3.jAug10-unspliced	Ace View	chr4	ncrna
TC0900008776.hg.1	-1.69702	0.0150667	89853	MVB12B	multivesicular body subunit 12B	NM_001011703; NM_033446; ENST00000361171; ENST00000402437; ENST00000470567; ENST00000485886; ENST00000489570; ENST00000489637; BC028675; OTTHUMT00000054110; OTTHUMT00000054111; OTTHUMT00000054112; OTTHUMT00000054113; OTTHUMT00000054114; OTTHUMT00000054115; CCDS35142.1; hsa_circ_0001891; hsa_circ_0008240; hsa_circ_0088607; hsa_circ_0088608; hsa_circ_0088609; hsa_circ_0088610; hsa_circ_0088611; hsa…	RefSeq; ENSEMBL; GenBank; Havana transcript; ccdsGene; circbase; UCSC Genes; Guo; lncRNAWiki; NONCODE	chr9	coding
TC0100018441.hg.1	-1.69662	0.145831	200008	CDCP2	CUB domain containing protein 2	NM_201546; ENST00000371330; ENST00000530059; OTTHUMT00000022209; OTTHUMT00000394342; CCDS588.2; CYB5RLandCDCP2.aAug10; torfarbu.aAug10; uc001cwv.3; uc057gtl.1	RefSeq; ENSEMBL; Havana transcript; ccdsGene; Ace View; UCSC Genes	chr1	coding
TC1200009131.hg.1	-1.69584	0.0620208	8655	DYNLL1	dynein, light chain, LC8-type 1	NM_001037494; NM_001037495; NM_003746; ENST00000242577; ENST00000392508; ENST00000392509; ENST00000548214; ENST00000548342; ENST00000549649; ENST00000549989; ENST00000550178; ENST00000550845; ENST00000552316; ENST00000552870; BC100289; BC104244; BC104245; OTTHUMT00000403709; OTTHUMT00000403710; OTTHUMT00000403711; OTTHUMT00000403712; OTTHUMT00000403713; OTTHUMT00000403714; OTTHUMT00000403715; OTT…	RefSeq; ENSEMBL; GenBank; Havana transcript; ccdsGene; Ace View; circbase; UCSC Genes; lncRNAWiki; NONCODE	chr12	coding
TC1000009792.hg.1	-1.6956	0.00432756	9712	USP6NL	USP6 N-terminal like	NM_001080491; NM_014688; NR_125732; ENST00000277575; ENST00000379237; ENST00000443016; ENST00000606752; ENST00000609104; ENST00000609853; BC042943; OTTHUMT00000046762; OTTHUMT00000046764; OTTHUMT00000470896; OTTHUMT00000471882; OTTHUMT00000471966; uc001iks.1; CCDS44357.1; CCDS53492.1; hsa_circ_0003978; hsa_circ_0006664; hsa_circ_0017683; hsa_circ_0017684; hsa_circ_0017685; hsa_circ_0017686; hsa_c…	RefSeq; ENSEMBL; GenBank; Havana transcript; UCSC Genes; ccdsGene; circbase; Ace View; Guo; lncRNAWiki; NONCODE	chr10	coding
TC0500009192.hg.1	-1.69512	0.12226	6444	SGCD	sarcoglycan delta	NM_000337; NM_001128209; NM_172244; ENST00000337851; ENST00000435422; ENST00000517913; ENST00000524347; BC020740; OTTHUMT00000373469; OTTHUMT00000373470; OTTHUMT00000373502; OTTHUMT00000373513; CCDS47325.1; CCDS47326.1; CCDS47327.1; hsa_circ_0074749; uc003lwc.5; uc003lwd.5; uc063jbm.1; uc063jbn.1; NONHSAT104739	RefSeq; ENSEMBL; GenBank; Havana transcript; ccdsGene; circbase; UCSC Genes; lncRNAWiki; NONCODE	chr5	coding
TC0700007949.hg.1	-1.69448	0.291971	9883	POM121	POM121 transmembrane nucleoporin	NM_001257190; NM_172020; ENST00000358357; ENST00000395270; ENST00000434423; ENST00000446813; ENST00000627934; BC008794; OTTHUMT00000252020; OTTHUMT00000252021; OTTHUMT00000347344; CCDS5542.1; CCDS59059.1; hsa_circ_0003261; hsa_circ_0005834; hsa_circ_0080443; hsa_circ_0080444; hsa_circ_0080445; hsa_circ_0080446; hsa_circ_0080447; hsa_circ_0080448; hsa_circ_0080449; hsa_circ_0080450; hsa_circ_00804…	RefSeq; ENSEMBL; GenBank; Havana transcript; ccdsGene; circbase; UCSC Genes	chr7	coding
TC1300006883.hg.1	-1.69415	0.0568854	400120	SERTM1	serine-rich and transmembrane domain containing 1	NM_203451; ENST00000315190; BC036540; OTTHUMT00000044518; CCDS9358.1; uc001uvt.5	RefSeq; ENSEMBL; GenBank; Havana transcript; ccdsGene; UCSC Genes	chr13	coding
TC1100010048.hg.1	-1.69397	0.481164	56676	ASCL3	achaete-scute family bHLH transcription factor 3	NM_020646; ENST00000531618; OTTHUMT00000385773; ASCL3.aAug10; BC146582; CCDS7795.1; uc057yvn.1	RefSeq; ENSEMBL; Havana transcript; Ace View; GenBank; ccdsGene; UCSC Genes	chr11	coding
TC0300008602.hg.1	-1.69372	0.0732652		KALRN	Transcript Identified by AceView, Entrez Gene ID(s) 8997	KALRN.vlAug10-unspliced	Ace View	chr3	ncrna
TC0600014259.hg.1	-1.69328	0.0129548	100532737	ATP6V1G2-DDX39B	ATP6V1G2-DDX39B readthrough (NMD candidate)	OTTHUMT00000355085; NR_037853_2; uc063nav.1; ENST00000376185	Havana transcript; RefSeq; UCSC Genes; ENSEMBL	chr6	ncrna
TC0100013483.hg.1	-1.69315	0.600736	6883	TAF12	TAF12 RNA polymerase II, TATA box binding protein (TBP)-associated factor, 20kDa	NM_001135218; NM_005644; ENST00000263974; ENST00000373824; ENST00000471683; ENST00000495422; BC011986; OTTHUMT00000010367; OTTHUMT00000010368; OTTHUMT00000010369; OTTHUMT00000010370; CCDS326.1; hsa_circ_0011159; hsa_circ_0011160; hsa_circ_0011161; hsa_circ_0011162; uc001bqx.5; uc001bqy.5; uc057dzk.1; uc057dzm.1	RefSeq; ENSEMBL; GenBank; Havana transcript; ccdsGene; circbase; UCSC Genes	chr1	coding
TC0900008545.hg.1	-1.69265	0.252374	5069	PAPPA	pregnancy-associated plasma protein A, pappalysin 1	NM_002581; ENST00000328252; ENST00000460463; ENST00000483254; BC078657; OTTHUMT00000055546; OTTHUMT00000055547; OTTHUMT00000055548; CCDS6813.1; hsa_circ_0002052; hsa_circ_0003076; hsa_circ_0005456; hsa_circ_0007243; hsa_circ_0008792; hsa_circ_0088208; hsa_circ_0088209; hsa_circ_0088210; hsa_circ_0088211; hsa_circ_0088212; hsa_circ_0088213; hsa_circ_0088214; hsa_circ_0088215; hsa_circ_0088216; hsa…	RefSeq; ENSEMBL; GenBank; Havana transcript; ccdsGene; circbase; Ace View; UCSC Genes; lncRNAWiki; NONCODE	chr9	coding
TC0900007488.hg.1	-1.69252	0.000400341	8395	PIP5K1B	phosphatidylinositol-4-phosphate 5-kinase, type I, beta	NM_001278253; NM_003558; ENST00000265382; ENST00000377284; ENST00000437200; ENST00000440050; ENST00000472907; ENST00000474356; ENST00000478500; ENST00000541509; BC030587; OTTHUMT00000052561; OTTHUMT00000052562; OTTHUMT00000052563; OTTHUMT00000052564; OTTHUMT00000052565; OTTHUMT00000052566; OTTHUMT00000052567; CCDS65063.1; CCDS6624.1; hsa_circ_0087139; hsa_circ_0087140; hsa_circ_0087141; hsa_circ_…	RefSeq; ENSEMBL; GenBank; Havana transcript; ccdsGene; circbase; Ace View; UCSC Genes; lncRNAWiki; NONCODE	chr9	coding
TC1600007099.hg.1	-1.69207	0.0794088	10229	COQ7	coenzyme Q7 homolog, ubiquinone (yeast)	NM_001190983; NM_016138; ENST00000321998; ENST00000544894; ENST00000561858; ENST00000564746; ENST00000566049; ENST00000566110; ENST00000567314; ENST00000568985; ENST00000569127; ENST00000569259; ENST00000569312; BC003185; BC043272; OTTHUMT00000254275; OTTHUMT00000435812; OTTHUMT00000435813; OTTHUMT00000435814; OTTHUMT00000435815; OTTHUMT00000435816; OTTHUMT00000435817; OTTHUMT00000435818; OTTHUMT…	RefSeq; ENSEMBL; GenBank; Havana transcript; ccdsGene; Ace View; circbase; UCSC Genes; NONCODE; lncRNAWiki	chr16	coding
TC1400008021.hg.1	-1.69201	0.0519405	1113	CHGA	chromogranin A	NM_001275; NM_001301690; ENST00000216492; ENST00000334654; ENST00000553866; ENST00000556076; ENST00000556098; ENST00000556876; BC001059; BC006459; OTTHUMT00000412411; OTTHUMT00000412412; OTTHUMT00000412414; OTTHUMT00000412415; OTTHUMT00000412416; OTTHUMT00000412417; CCDS9906.1; CHGA.hAug10; uc001ybc.6; uc001ybd.6; uc059eon.1; uc059eoo.1; uc059eop.1; uc059eoq.1; NONHSAT039340	RefSeq; ENSEMBL; GenBank; Havana transcript; ccdsGene; Ace View; UCSC Genes; lncRNAWiki; NONCODE	chr14	coding
TC1200007352.hg.1	-1.69187	0.63029	120892	LRRK2	leucine-rich repeat kinase 2	NM_198578; ENST00000298910; ENST00000343742; ENST00000416796; ENST00000430804; ENST00000474202; ENST00000479187; ENST00000481256; BC117180; OTTHUMT00000132847; OTTHUMT00000132920; OTTHUMT00000132921; OTTHUMT00000134017; OTTHUMT00000277179; OTTHUMT00000277180; OTTHUMT00000277181; CCDS31774.1; hsa_circ_0025885; hsa_circ_0025886; hsa_circ_0025887; hsa_circ_0025888; hsa_circ_0025889; hsa_circ_0025890…	RefSeq; ENSEMBL; GenBank; Havana transcript; ccdsGene; circbase; Ace View; UCSC Genes; Guo; lncRNAWiki; NONCODE	chr12	coding
TC0100013999.hg.1	-1.6918	0.331011	57643	ZSWIM5	zinc finger, SWIM-type containing 5	NM_020883; ENST00000359600; ENST00000464588; OTTHUMT00000024823; OTTHUMT00000024862; CCDS41319.1; hsa_circ_0012214; hsa_circ_0012215; uc001cnd.3; uc057fye.1; ZSWIM5.bAug10; chr1_45553552_45553909; NONHSAT002919	RefSeq; ENSEMBL; Havana transcript; ccdsGene; circbase; UCSC Genes; Ace View; Guo; lncRNAWiki; NONCODE	chr1	coding
TC0300007647.hg.1	-1.69157	0.374403		PTPRG	Jeck2013 ALT_ACCEPTOR, ALT_DONOR, coding, INTERNAL, intronic best transcript NM_002841	hsa_circ_0002134; hsa_circ_0002848; hsa_circ_0005989; hsa_circ_0006226; hsa_circ_0007038; hsa_circ_0007596; hsa_circ_0007599; chr3_61607643_61609229; chr3_61608136_61609229; chr3_61608136_61617668	circbase; Guo	chr3	ncrna
TC0800012035.hg.1	-1.69118	0.0540889	389690	MROH5	maestro heat-like repeat family member 5	NM_207414; NR_102363; NR_102364; ENST00000430863; ENST00000521053; ENST00000521161; ENST00000523857; ENST00000621837; OTTHUMT00000342412; OTTHUMT00000380359; OTTHUMT00000380360; OTTHUMT00000380361; uc003ywi.2; BC172345; uc010meu.3; uc064qtz.1; uc064qua.1; uc064qud.1	RefSeq; ENSEMBL; Havana transcript; UCSC Genes; GenBank	chr8	coding
TC0800012160.hg.1	-1.69107	0.321015	286077	FAM83H	family with sequence similarity 83, member H	NM_198488; ENST00000388913; ENST00000395103; OTTHUMT00000257632; OTTHUMT00000382207; CCDS6410.2; hsa_circ_0085862; hsa_circ_0085863; hsa_circ_0085864; hsa_circ_0085865; hsa_circ_0085866; hsa_circ_0085867; hsa_circ_0085868; hsa_circ_0085869; hsa_circ_0085870; uc064rej.1; uc064rek.1	RefSeq; ENSEMBL; Havana transcript; ccdsGene; circbase; UCSC Genes	chr8	coding
TC0600014260.hg.1	-1.69092	0.611443	534	ATP6V1G2	ATPase, H+ transporting, lysosomal 13kDa, V1 subunit G2	NM_001204078; NM_130463; NM_138282; ENST00000303892; ENST00000376151; ENST00000415099; ENST00000481998; ENST00000483170; ENST00000483251; BC119726; BC119727; OTTHUMT00000076399; OTTHUMT00000076400; OTTHUMT00000259095; OTTHUMT00000259096; OTTHUMT00000355083; OTTHUMT00000355084; ATP6V1G2andBAT1andSNORD84.vpAug10; CCDS4698.1; CCDS4699.1; CCDS56413.1; uc003ntz.4; uc003nua.4; uc021yur.2; uc063nbp.1; u…	RefSeq; ENSEMBL; GenBank; Havana transcript; Ace View; ccdsGene; UCSC Genes; lncRNAWiki; NONCODE; RNACentral	chr6	coding
TC0200010021.hg.1	-1.69055	0.00577186		H3F3AP4; H3F3A; H3F3B	Homo sapiens H3 histone, family 3A, pseudogene 4 (H3F3AP4), non-coding RNA.; Homo sapiens H3 histone, family 3A, mRNA (cDNA clone MGC:47761 IMAGE:6014954), complete cds.; Homo sapiens H3 histone, family 3B (H3.3B), mRNA (cDNA clone MGC:87782 IMAGE:3884607), complete cds.; Homo sapiens H3 histone, family 3A, mRNA (cDNA clone MGC:87783 IMAGE:5162817), complete cds.	NR_002315_2; BC038989_2; BC081560_2; BC081561_2; ENST00000369387; OTTHUMT00000334152	RefSeq; GenBank; ENSEMBL; Havana transcript	chr2	ncrna
TC0100012673.hg.1	-1.69054	0.401416	23463	ICMT	isoprenylcysteine carboxyl methyltransferase	NM_012405; ENST00000343813; ENST00000474756; ENST00000489498; ENST00000495791; BC028168; OTTHUMT00000003681; OTTHUMT00000003682; OTTHUMT00000003684; OTTHUMT00000003685; CCDS61.1; hsa_circ_0007427; hsa_circ_0009487; hsa_circ_0009488; hsa_circ_0009489; hsa_circ_0009490; hsa_circ_0009491; hsa_circ_0009492; ICMT.aAug10; uc001amk.4; uc057bts.1; uc057btt.1; uc057btu.1; NONHSAT000634	RefSeq; ENSEMBL; GenBank; Havana transcript; ccdsGene; circbase; Ace View; UCSC Genes; lncRNAWiki; NONCODE	chr1	coding
TC1900009999.hg.1	-1.69027	0.315366	3594	IL12RB1	interleukin 12 receptor, beta 1	NM_001290023; NM_001290024; NM_005535; NM_153701; ENST00000322153; ENST00000430026; ENST00000593993; ENST00000594176; ENST00000597416; ENST00000598019; ENST00000600835; BC137404; BC137406; uc002nhy.3; CCDS32957.1; CCDS54232.1; hsa_circ_0050062; hsa_circ_0050063; uc002nhw.2; uc002nhx.2; uc060vod.1; uc060voe.1; uc060vof.1; uc060vog.1; NONHSAT062935; OTTHUMT00000466525; OTTHUMT00000466855; OTTHUMT00…	RefSeq; ENSEMBL; GenBank; UCSC Genes; ccdsGene; circbase; lncRNAWiki; NONCODE; Havana transcript	chr19	coding
TC0900012189.hg.1	-1.69017	0.00437572	85014	TMEM141	transmembrane protein 141	NM_032928; ENST00000290079; ENST00000465017; ENST00000479737; ENST00000483187; ENST00000484854; ENST00000489739; BC007834; OTTHUMT00000055119; OTTHUMT00000055120; OTTHUMT00000055122; OTTHUMT00000055124; OTTHUMT00000055126; OTTHUMT00000055128; CCDS7007.1; hsa_circ_0089567; hsa_circ_0089568; uc004cje.5; uc064xdx.1; uc064xdy.1; uc064xdz.1; uc064xeb.1; uc064xec.1; NONHSAT135599; NONHSAT135600; NONHSA…	RefSeq; ENSEMBL; GenBank; Havana transcript; ccdsGene; circbase; UCSC Genes; lncRNAWiki; NONCODE	chr9	coding
TC0500011495.hg.1	-1.69014	0.535322	83890	SPATA9	spermatogenesis associated 9	NM_031952; NR_125327; NR_125328; NR_125329; NR_125330; ENST00000274432; ENST00000316087; ENST00000379990; ENST00000477047; ENST00000477715; ENST00000489917; BC032832; BC047333; OTTHUMT00000241656; OTTHUMT00000304034; OTTHUMT00000304035; OTTHUMT00000304036; OTTHUMT00000369951; OTTHUMT00000370244; CCDS4076.1; SPATA9.cAug10; SPATA9.gAug10; uc003kli.2; uc003klj.2; uc010jbh.2; uc063fmq.1; uc063fmt.1; …	RefSeq; ENSEMBL; GenBank; Havana transcript; ccdsGene; Ace View; UCSC Genes	chr5	coding
TC0600007540.hg.1	-1.68991	0.837895	221545	C6orf136	chromosome 6 open reading frame 136	ENST00000293604; ENST00000376471; ENST00000376473; ENST00000446773; ENST00000460172; ENST00000463794; ENST00000465699; ENST00000467801; ENST00000468785; ENST00000484551; ENST00000487873; ENST00000488383; ENST00000493705; BC016167; OTTHUMT00000076456; OTTHUMT00000076457; OTTHUMT00000076458; OTTHUMT00000076459; OTTHUMT00000256234; OTTHUMT00000256235; OTTHUMT00000256236; OTTHUMT00000256237; OTTHUMT0…	ENSEMBL; GenBank; Havana transcript; RefSeq; ccdsGene; UCSC Genes; Guo; circbase; lncRNAWiki; NONCODE	chr6	coding
TC1900008287.hg.1	-1.68986	0.642926	5819	PVRL2	poliovirus receptor-related 2 (herpesvirus entry mediator B)	NM_001042724; NM_002856; ENST00000252483; ENST00000252485; ENST00000585601; ENST00000587386; ENST00000591581; ENST00000592018; BC003091; OTTHUMT00000453230; OTTHUMT00000453231; OTTHUMT00000453232; OTTHUMT00000453233; OTTHUMT00000453234; OTTHUMT00000453235; CCDS12645.1; CCDS42576.1; hsa_circ_0051403; hsa_circ_0051404; hsa_circ_0051405; hsa_circ_0051406; hsa_circ_0051407; hsa_circ_0051408; hsa_circ…	RefSeq; ENSEMBL; GenBank; Havana transcript; ccdsGene; circbase; Ace View; UCSC Genes; Guo	chr19	coding
TC1100008199.hg.1	-1.68946	0.0690485	51083	GAL	galanin/GMAP prepropeptide	NM_015973; ENST00000265643; ENST00000538401; BC030241; OTTHUMT00000396843; OTTHUMT00000397456; CCDS8183.1; hsa_circ_0023240; hsa_circ_0023241; hsa_circ_0023242; hsa_circ_0023243; hsa_circ_0023244; hsa_circ_0023245; uc001oob.4; uc058eog.1; NONHSAT022538	RefSeq; ENSEMBL; GenBank; Havana transcript; ccdsGene; circbase; UCSC Genes; lncRNAWiki; NONCODE	chr11	coding
TC0700008306.hg.1	-1.6892	0.0042366	8321	FZD1	frizzled class receptor 1	NM_003505; ENST00000287934; BC051271; OTTHUMT00000059367; CCDS5620.1; uc003ula.4	RefSeq; ENSEMBL; GenBank; Havana transcript; ccdsGene; UCSC Genes	chr7	coding
TSUnmapped00000810.hg.1	-1.68918	0.0506068		PRAMEF19	PRAME family member 19 [Source:EntrezGene;Acc:645414]	ENST00000631823	ENSEMBL		ncrna
TC2000007814.hg.1	-1.6891	0.229184	4159	MC3R	melanocortin 3 receptor	NM_019888; ENST00000243911; BC069105; BC069599; BC096702; BC096737; BC098169; BC098351; OTTHUMT00000079786; uc002xxb.2; CCDS13449.2	RefSeq; ENSEMBL; GenBank; Havana transcript; UCSC Genes; ccdsGene	chr20	coding
TC1900006616.hg.1	-1.68867	0.0150778	2767	GNA11	guanine nucleotide binding protein (G protein), alpha 11 (Gq class)	NM_002067; ENST00000078429; ENST00000586180; ENST00000586763; ENST00000587636; ENST00000588401; ENST00000590534; ENST00000591301; BC089041; BC096225; BC096226; BC096227; OTTHUMT00000452261; OTTHUMT00000452295; OTTHUMT00000452296; OTTHUMT00000452297; OTTHUMT00000452298; OTTHUMT00000452299; OTTHUMT00000452302; CCDS12103.1; hsa_circ_0048450; hsa_circ_0048451; uc010xhe.5; uc060rog.1; uc060roh.1; uc06…	RefSeq; ENSEMBL; GenBank; Havana transcript; ccdsGene; circbase; UCSC Genes; lncRNAWiki; NONCODE	chr19	coding
TC0800006869.hg.1	-1.68783	0.0563046	6542	SLC7A2	solute carrier family 7 (cationic amino acid transporter, y+ system), member 2	NM_001008539; NM_001164771; NM_003046; ENST00000004531; ENST00000398090; ENST00000470360; ENST00000494857; ENST00000522656; BC069648; BC104905; BC113661; BC143583; OTTHUMT00000253367; OTTHUMT00000253368; OTTHUMT00000375242; CCDS34852.1; CCDS55203.1; CCDS6002.2; hsa_circ_0005805; hsa_circ_0083428; hsa_circ_0083429; hsa_circ_0083430; hsa_circ_0083431; hsa_circ_0083432; hsa_circ_0083433; hsa_circ_00…	RefSeq; ENSEMBL; GenBank; Havana transcript; ccdsGene; circbase; UCSC Genes; lncRNAWiki; NONCODE	chr8	coding
TC1000010172.hg.1	-1.68677	0.000936871	6840	SVIL	supervillin	NM_003174; NM_021738; ENST00000355867; ENST00000375398; ENST00000375400; ENST00000460007; ENST00000464726; ENST00000464984; ENST00000465422; ENST00000474106; ENST00000482607; ENST00000483758; ENST00000490031; ENST00000491872; ENST00000632315; OTTHUMT00000047393; OTTHUMT00000047394; OTTHUMT00000047395; OTTHUMT00000047396; OTTHUMT00000047398; OTTHUMT00000047399; OTTHUMT00000047400; OTTHUMT000000474…	RefSeq; ENSEMBL; Havana transcript; GenBank; ccdsGene; circbase; Ace View; UCSC Genes; lncRNAWiki; NONCODE	chr10	coding
TC0X00010837.hg.1	-1.68663	0.447092	55796	MBNL3	muscleblind-like splicing regulator 3	NM_001170701; NM_001170702; NM_001170703; NM_001170704; NM_018388; NM_133486; ENST00000370839; ENST00000370844; ENST00000370849; ENST00000370853; ENST00000370857; ENST00000394311; ENST00000421707; ENST00000436215; ENST00000442191; ENST00000465964; ENST00000473364; ENST00000538204; BC042090; BC074775; BC074776; OTTHUMT00000058318; OTTHUMT00000058319; OTTHUMT00000058320; OTTHUMT00000058321; OTTHUMT…	RefSeq; ENSEMBL; GenBank; Havana transcript; ccdsGene; circbase; UCSC Genes; Guo; lncRNAWiki; NONCODE	chrX	coding
TC0300007383.hg.1	-1.68584	0.0618266	1605	DAG1	dystroglycan 1 (dystrophin-associated glycoprotein 1)	NM_001165928; NM_001177634; NM_001177635; NM_001177636; NM_001177637; NM_001177638; NM_001177639; NM_001177640; NM_001177641; NM_001177642; NM_001177643; NM_001177644; NM_004393; ENST00000308775; ENST00000418588; ENST00000419218; ENST00000421560; ENST00000428779; ENST00000430636; ENST00000431960; ENST00000435508; ENST00000452060; ENST00000452317; ENST00000461492; ENST00000461987; ENST00000466701;…	RefSeq; ENSEMBL; GenBank; Havana transcript; UCSC Genes; ccdsGene; Ace View; circbase; lncRNAWiki; NONCODE	chr3	coding
TC0900007113.hg.1	-1.68519	0.142654	8434	RECK	reversion-inducing-cysteine-rich protein with kazal motifs	NM_021111; ENST00000377966; ENST00000475774; ENST00000479053; BC137093; OTTHUMT00000052409; OTTHUMT00000052410; OTTHUMT00000052411; ENST00000616606; CCDS6597.1; hsa_circ_0086992; hsa_circ_0086993; hsa_circ_0086994; hsa_circ_0086995; hsa_circ_0086996; uc003zyv.4; uc064tag.1; uc064tah.1; uc064tai.1; T358040	RefSeq; ENSEMBL; GenBank; Havana transcript; ccdsGene; circbase; UCSC Genes; miTranscriptome	chr9	coding
TC0100007486.hg.1	-1.68502	0.0368488	2810	SFN	stratifin	NM_006142; ENST00000339276; BC000329; BC000995; BC001550; BC002995; BC023552; OTTHUMT00000011709; CCDS288.1; uc001bnc.2	RefSeq; ENSEMBL; GenBank; Havana transcript; ccdsGene; UCSC Genes	chr1	coding
TC1600010363.hg.1	-1.6849	0.0210539	79191	IRX3	iroquois homeobox 3	NM_024336; ENST00000329734; ENST00000558054; ENST00000558180; BC023667; OTTHUMT00000256910; OTTHUMT00000417410; OTTHUMT00000417411; CCDS10750.1; IRX3.aAug10; uc002eht.2; uc059ugx.1; uc059ugy.1	RefSeq; ENSEMBL; GenBank; Havana transcript; ccdsGene; Ace View; UCSC Genes	chr16	coding
TC2000008656.hg.1	-1.68402	0.645185	200261	LINC00656	long intergenic non-protein coding RNA 656	NR_034149; ENST00000443744; BC117361; ENST00000443744.1; OTTHUMT00000256764; uc021wbi.3; HG511262.1:1..1896:ncRNA; lnc-CD93-2:1; NONHSAT079035; NR_034149.1:1..1926:ncRNA; TCONS_00027847	RefSeq; ENSEMBL; GenBank; lncRNAWiki; Havana transcript; UCSC Genes; RNACentral; NONCODE; lncRNA Db	chr20	ncrna
TC1800007518.hg.1	-1.68237	0.0677189	54877	ZCCHC2	zinc finger, CCHC domain containing 2	NM_017742; NR_126534; ENST00000269499; ENST00000585873; ENST00000585949; ENST00000586834; ENST00000587612; ENST00000588676; ENST00000590840; ENST00000591145; ENST00000591435; ENST00000591632; ENST00000621048; BC137435; OTTHUMT00000450083; OTTHUMT00000450084; OTTHUMT00000450085; OTTHUMT00000450086; OTTHUMT00000450087; OTTHUMT00000450088; OTTHUMT00000450089; OTTHUMT00000450090; OTTHUMT00000450091; …	RefSeq; ENSEMBL; GenBank; Havana transcript; ccdsGene; circbase; UCSC Genes; Ace View; Guo; lncRNAWiki; NONCODE	chr18	coding
TC0700009807.hg.1	-1.68142	0.0684526	3638	INSIG1	insulin induced gene 1	NM_005542; NM_198336; NM_198337; ENST00000340368; ENST00000342407; ENST00000344756; ENST00000425172; ENST00000468307; ENST00000476756; BC001880; OTTHUMT00000322244; OTTHUMT00000322245; OTTHUMT00000322246; OTTHUMT00000322247; OTTHUMT00000322248; uc003wly.3; CCDS5938.1; CCDS5939.1; hsa_circ_0083080; hsa_circ_0083081; hsa_circ_0083082; hsa_circ_0083083; hsa_circ_0083084; uc003wlz.4; uc011kvu.3; uc06…	RefSeq; ENSEMBL; GenBank; Havana transcript; UCSC Genes; ccdsGene; circbase	chr7	coding
TC0900011947.hg.1	-1.68118	0.328419	360203	GLT6D1	glycosyltransferase 6 domain containing 1	NM_182974; ENST00000371763; ENST00000613244; OTTHUMT00000055005; uc010nbd.1; CCDS43900.1; GLT6D1.aAug10; uc064wzn.1	RefSeq; ENSEMBL; Havana transcript; UCSC Genes; ccdsGene; Ace View	chr9	coding
TC0700011494.hg.1	-1.68092	0.218786	9275	BCL7B	B-cell CLL/lymphoma 7B	NM_001197244; NM_001301061; NM_001707; NR_036682; ENST00000223368; ENST00000411832; ENST00000416906; ENST00000448175; ENST00000454871; ENST00000455335; ENST00000463858; ENST00000464288; ENST00000481667; ENST00000482231; ENST00000486818; ENST00000493592; ENST00000493671; ENST00000493679; BC000956; BC001967; BC009548; OTTHUMT00000252194; OTTHUMT00000347609; OTTHUMT00000347610; OTTHUMT00000347611; O…	RefSeq; ENSEMBL; GenBank; Havana transcript; Ace View; ccdsGene; circbase; UCSC Genes; lncRNAWiki; NONCODE	chr7	coding
TC1100009707.hg.1	-1.68088	0.385455	5441	POLR2L	polymerase (RNA) II (DNA directed) polypeptide L, 7.6kDa	NM_021128; ENST00000322028; ENST00000534030; BC005903; BC018649; OTTHUMT00000257114; OTTHUMT00000384558; CCDS7720.1; uc001lsc.4; uc057xpd.1	RefSeq; ENSEMBL; GenBank; Havana transcript; ccdsGene; UCSC Genes	chr11	coding
TC1900012006.hg.1	-1.68044	0.295255	84335	AKT1S1	AKT1 substrate 1 (proline rich)	NM_001098632; NM_001098633; NM_001278159; NM_001278160; NM_032375; ENST00000344175; ENST00000391830; ENST00000391831; ENST00000391832; ENST00000391833; ENST00000391834; ENST00000391835; ENST00000482622; ENST00000599525; BC007416; BC016043; BC051844; OTTHUMT00000317069; OTTHUMT00000317070; OTTHUMT00000317071; OTTHUMT00000317072; OTTHUMT00000317073; OTTHUMT00000317074; OTTHUMT00000317075; OTTHUMT00…	RefSeq; ENSEMBL; GenBank; Havana transcript; ccdsGene; circbase; UCSC Genes; lncRNAWiki; NONCODE	chr19	coding
TC1200012704.hg.1	-1.67985	0.0208952	84260	TCHP	trichoplein, keratin filament binding	NM_001143852; NM_032300; ENST00000312777; ENST00000405876; ENST00000536408; ENST00000537218; ENST00000537880; ENST00000549550; ENST00000551627; BC004285; OTTHUMT00000403285; OTTHUMT00000403287; OTTHUMT00000403289; OTTHUMT00000403290; OTTHUMT00000403291; OTTHUMT00000403403; OTTHUMT00000403404; CCDS9137.1; hsa_circ_0028146; TCHP.bAug10; uc001tpn.4; uc001tpp.4; uc058taq.1; uc058tar.1; uc058tas.1; uc…	RefSeq; ENSEMBL; GenBank; Havana transcript; ccdsGene; circbase; Ace View; UCSC Genes; lncRNAWiki; NONCODE	chr12	coding
TC1200008568.hg.1	-1.67983	0.0327195	7112	TMPO	thymopoietin	NM_001032283; NM_001032284; NM_001307975; NM_003276; ENST00000261210; ENST00000266732; ENST00000343315; ENST00000393053; ENST00000546828; ENST00000547214; ENST00000548223; ENST00000548911; ENST00000549938; ENST00000551987; ENST00000552831; ENST00000556029; ENST00000556678; BC053675; OTTHUMT00000407973; OTTHUMT00000407974; OTTHUMT00000407976; OTTHUMT00000407977; OTTHUMT00000407978; OTTHUMT00000407…	RefSeq; ENSEMBL; GenBank; Havana transcript; ccdsGene; circbase; UCSC Genes; Guo; lncRNAWiki; NONCODE	chr12	coding
TC1100011375.hg.1	-1.67911	0.267322	53838	C11orf24	chromosome 11 open reading frame 24	NM_001300913; NM_022338; ENST00000304271; ENST00000527280; ENST00000529339; ENST00000529590; ENST00000530166; ENST00000531745; ENST00000532534; ENST00000532969; ENST00000533310; BC011765; OTTHUMT00000394750; OTTHUMT00000394751; OTTHUMT00000394752; OTTHUMT00000394753; OTTHUMT00000394754; OTTHUMT00000394755; OTTHUMT00000394756; OTTHUMT00000394757; OTTHUMT00000394758; C11orf24.dAug10; C11orf24.gAug1…	RefSeq; ENSEMBL; GenBank; Havana transcript; Ace View; ccdsGene; UCSC Genes; lncRNAWiki; NONCODE	chr11	coding
TC1200009183.hg.1	-1.67908	0.248853	23067	SETD1B	SET domain containing 1B	NM_015048; ENST00000267197; ENST00000542440; ENST00000604567; ENST00000619791; OTTHUMT00000402183; OTTHUMT00000468264; CCDS53838.1; hsa_circ_0029022; SETD1B.aAug10; uc021rfg.2; uc058ujh.1; uc058uji.1; uc058ujj.1	RefSeq; ENSEMBL; Havana transcript; ccdsGene; circbase; Ace View; UCSC Genes	chr12	coding
TC1900011739.hg.1	-1.67825	0.0334897	11100	HNRNPUL1	heterogeneous nuclear ribonucleoprotein U-like 1	NM_001301016; NM_007040; NM_144732; ENST00000263367; ENST00000352456; ENST00000378215; ENST00000392006; ENST00000593587; ENST00000594207; ENST00000595018; ENST00000595196; ENST00000595336; ENST00000595806; ENST00000597725; ENST00000599521; ENST00000599614; ENST00000599719; ENST00000600332; ENST00000600493; ENST00000600596; ENST00000601309; ENST00000601336; ENST00000602130; ENST00000617305; ENST00…	RefSeq; ENSEMBL; GenBank; Havana transcript; ccdsGene; Ace View; circbase; UCSC Genes; lncRNAWiki; NONCODE	chr19	coding
TC1200012712.hg.1	-1.67794	0.0953731	643246	MAP1LC3B2	microtubule-associated protein 1 light chain 3 beta 2	ENST00000547114; ENST00000630062; OTTHUMT00000481298; OTTHUMT00000481299; ENST00000547114.1; uc058tsj.1; uc058tsk.1; HG505220.1:1..732:ncRNA; lnc-MAP1LC3B2-1:1; lnc-MAP1LC3B2-1:3; NONHSAT030950; NONHSAT030952; NONHSAT030953; NONHSAT030954; TCONS_00020583; TCONS_00020584	ENSEMBL; Havana transcript; lncRNAWiki; UCSC Genes; RNACentral; NONCODE; lncRNA Db	chr12	coding
TC0700012506.hg.1	-1.6778	0.0302024	5078	PAX4	paired box 4	NM_006193; ENST00000338516; ENST00000341640; ENST00000378740; ENST00000463946; ENST00000477423; ENST00000483494; ENST00000611453; BC074761; BC107149; BC107150; OTTHUMT00000349165; OTTHUMT00000349166; OTTHUMT00000349167; OTTHUMT00000349168; OTTHUMT00000349169; uc003vmg.1; uc010lld.1; CCDS5797.1; PAX4.aAug10; PAX4.bAug10; PAX4.cAug10; PAX4.dAug10; PAX4.eAug10; uc003vmf.3; uc064hsf.1; uc064hsg.1; uc…	RefSeq; ENSEMBL; GenBank; Havana transcript; UCSC Genes; ccdsGene; Ace View	chr7	coding
TC0200013861.hg.1	-1.67723	0.0493971	7851	MALL	mal, T-cell differentiation protein-like	NM_005434; ENST00000272462; ENST00000424988; ENST00000427178; BC003179; OTTHUMT00000253921; OTTHUMT00000338105; OTTHUMT00000338106; uc002tfk.3; CCDS2085.1; hsa_circ_0056017; MALL.iAug10; uc061mul.1; uc061mum.1	RefSeq; ENSEMBL; GenBank; Havana transcript; UCSC Genes; ccdsGene; circbase; Ace View	chr2	coding
TC1600007514.hg.1	-1.67719	0.0582863	84148	KAT8	K(lysine) acetyltransferase 8	NM_032188; NM_182958; ENST00000219797; ENST00000448516; ENST00000537402; ENST00000538768; ENST00000539683; ENST00000543774; ENST00000573144; BC037773; OTTHUMT00000255546; OTTHUMT00000395860; OTTHUMT00000395861; OTTHUMT00000395862; OTTHUMT00000395863; OTTHUMT00000438806; CCDS10706.1; CCDS45468.1; MYST1.bAug10; uc002eax.4; uc002eay.4; uc032dxo.2; uc059tlg.1; uc059tlh.1; uc059tll.1; uc059tlm.1; NONH…	RefSeq; ENSEMBL; GenBank; Havana transcript; ccdsGene; Ace View; UCSC Genes; lncRNAWiki; NONCODE	chr16	coding
TSUnmapped00000445.hg.1	-1.6767	0.00396249	2091	FBL	fibrillarin	ENST00000628079	ENSEMBL		coding
TC0700007822.hg.1	-1.67643	0.292514	154807	VKORC1L1	vitamin K epoxide reductase complex subunit 1 like 1	NM_001284342; NM_173517; ENST00000360768; ENST00000434382; BC027734; OTTHUMT00000251612; OTTHUMT00000345550; CCDS5529.1; CCDS64663.1; hsa_circ_0080311; hsa_circ_0080312; uc003tum.3; uc011kds.4; VKORC1L1.aAug10	RefSeq; ENSEMBL; GenBank; Havana transcript; ccdsGene; circbase; UCSC Genes; Ace View	chr7	coding
TC0100016356.hg.1	-1.67636	0.0661435	2153	F5	coagulation factor V (proaccelerin, labile factor)	NM_000130; ENST00000367796; ENST00000367797; ENST00000495481; OTTHUMT00000083712; OTTHUMT00000083713; OTTHUMT00000083714; BC111588; CCDS1281.1; F5.dAug10; hsa_circ_0015166; uc001ggg.2; uc057nea.1; uc057neb.1	RefSeq; ENSEMBL; Havana transcript; GenBank; ccdsGene; Ace View; circbase; UCSC Genes	chr1	coding
TC1900007181.hg.1	-1.67595	0.00713892	9524; 693224	TECR; MIR639	trans-2,3-enoyl-CoA reductase; microRNA 639	NM_138501; NR_030369; NR_038103; NR_038104; ENST00000215567; ENST00000384974; ENST00000593637; ENST00000593775; ENST00000594545; ENST00000594807; ENST00000594958; ENST00000596073; ENST00000596164; ENST00000596953; ENST00000597607; ENST00000598298; ENST00000598333; ENST00000598408; ENST00000598715; ENST00000598918; ENST00000598987; ENST00000599101; ENST00000599646; ENST00000600076; ENST00000600083…	RefSeq; ENSEMBL; GenBank; Havana transcript; UCSC Genes; ccdsGene; circbase; Ace View; lncRNAWiki; NONCODE; RNACentral	chr19	coding
TC0600013196.hg.1	-1.67576	0.347332	9038	TAAR5	trace amine associated receptor 5	NM_003967; ENST00000258034; BC069171; BC095541; BC112209; BC112211; OTTHUMT00000042257; CCDS5156.1; uc003qdk.3	RefSeq; ENSEMBL; GenBank; Havana transcript; ccdsGene; UCSC Genes	chr6	coding
TC1200010686.hg.1	-1.67565	0.0136871	4891	SLC11A2	solute carrier family 11 (proton-coupled divalent metal ion transporter), member 2	NM_000617; NM_001174125; NM_001174126; NM_001174127; NM_001174128; NM_001174129; NM_001174130; NR_033421; NR_033422; ENST00000262051; ENST00000262052; ENST00000394904; ENST00000541174; ENST00000545993; ENST00000546488; ENST00000546636; ENST00000546743; ENST00000547198; ENST00000547510; ENST00000547579; ENST00000547688; ENST00000547732; ENST00000548150; ENST00000548193; ENST00000548554; ENST000005…	RefSeq; ENSEMBL; GenBank; Havana transcript; UCSC Genes; ccdsGene; circbase; Ace View; Guo; lncRNAWiki; NONCODE	chr12	coding
TSUnmapped00000061.hg.1	-1.67514	0.0124445	2091	FBL	fibrillarin	ENST00000625673	ENSEMBL		coding
TSUnmapped00000380.hg.1	-1.67441	0.00457827	2091	FBL	fibrillarin	ENST00000629982	ENSEMBL		coding
TC0100017072.hg.1	-1.67433	0.0215297	2005	ELK4	ELK4, ETS-domain protein (SRF accessory protein 1)	NM_001973; NM_021795; ENST00000289703; ENST00000357992; ENST00000468523; ENST00000616704; ENST00000617725; BC063676; OTTHUMT00000090615; OTTHUMT00000090616; OTTHUMT00000090617; OTTHUMT00000473443; OTTHUMT00000473444; CCDS1456.1; CCDS1457.1; hsa_circ_0000175; hsa_circ_0016208; hsa_circ_0016209; hsa_circ_0016210; hsa_circ_0016211; hsa_circ_0016212; SLC45A3andELK4.iAug10; SLC45A3andELK4.nAug10; uc00…	RefSeq; ENSEMBL; GenBank; Havana transcript; ccdsGene; circbase; Ace View; UCSC Genes; Guo; lncRNAWiki; NONCODE	chr1	coding
TC1700008328.hg.1	-1.67396	0.652281	252983	STXBP4	syntaxin binding protein 4	NM_178509; ENST00000376352; ENST00000398391; ENST00000405898; ENST00000434978; ENST00000461444; ENST00000463234; ENST00000464340; ENST00000468837; BC125116; OTTHUMT00000157184; OTTHUMT00000157185; OTTHUMT00000157186; OTTHUMT00000157187; OTTHUMT00000157188; OTTHUMT00000157189; OTTHUMT00000157190; OTTHUMT00000380097; CCDS11584.2; ENST00000565472.1; hsa_circ_0044696; hsa_circ_0044697; hsa_circ_00446…	RefSeq; ENSEMBL; GenBank; Havana transcript; ccdsGene; lncRNAWiki; circbase; Ace View; UCSC Genes; Guo; NONCODE	chr17	coding
TC0200015368.hg.1	-1.6739	0.103036	348751	FTCDNL1	formiminotransferase cyclodeaminase N-terminal like	NR_034096; OTTHUMT00000335448; OTTHUMT00000335787; OTTHUMT00000335788; LOC348751.aAug10; uc021vup.2; uc061rbk.1; uc061rbl.1; uc061rbm.1; ENST00000416668; ENST00000420128; ENST00000420922; ENST00000622774; lnc-AC073043.2.1-1:1; lnc-AC073043.2.1-1:2; lnc-AC073043.2.1-1:3; lnc-AC073043.2.1-1:4; lnc-AC073043.2.1-1:5; NONHSAT076264; NONHSAT076266; NONHSAT076268; TCONS_00002678; TCONS_00004543; TCONS_0…	RefSeq; Havana transcript; Ace View; UCSC Genes; ENSEMBL; lncRNAWiki; NONCODE; lncRNA Db	chr2	ncrna
TC0400012992.hg.1	-1.67387	0.186671	9848	MFAP3L	microfibrillar associated protein 3 like	NM_001009554; NM_001301647; NM_001301648; NM_021647; ENST00000361618; ENST00000393702; ENST00000393704; ENST00000502832; ENST00000504999; ENST00000506764; ENST00000507601; ENST00000510306; ENST00000512698; BC066912; OTTHUMT00000363043; OTTHUMT00000363044; OTTHUMT00000363045; OTTHUMT00000363102; OTTHUMT00000363103; OTTHUMT00000363104; OTTHUMT00000363105; OTTHUMT00000363106; OTTHUMT00000363107; uc0…	RefSeq; ENSEMBL; GenBank; Havana transcript; UCSC Genes; ccdsGene	chr4	coding
TC1000010516.hg.1	-1.67377	0.254772	4477	MSMB	microseminoprotein, beta-	NM_002443; NM_138634; ENST00000581478; ENST00000582163; BC005257; OTTHUMT00000476880; CCDS73095.1; CCDS73096.1; uc001jiq.5; uc001jir.5; NONHSAT013343; NONHSAT013344; NONHSAT013345; NONHSAT013346; NONHSAT013347	RefSeq; ENSEMBL; GenBank; Havana transcript; ccdsGene; UCSC Genes; lncRNAWiki; NONCODE	chr10	coding
TC1600007504.hg.1	-1.67357	0.0212688	9739	SETD1A	SET domain containing 1A	NM_014712; ENST00000262519; ENST00000452917; OTTHUMT00000318244; OTTHUMT00000318245; CCDS32435.1; hsa_circ_0039125; hsa_circ_0039126; hsa_circ_0039127; hsa_circ_0039128; hsa_circ_0039129; hsa_circ_0039130; hsa_circ_0039131; uc002ead.2; uc059tjf.1	RefSeq; ENSEMBL; Havana transcript; ccdsGene; circbase; UCSC Genes	chr16	coding
TC0100017617.hg.1	-1.67354	0.149099	92815	HIST3H2A	histone cluster 3, H2a	NM_033445; ENST00000366695; OTTHUMT00000096598; CCDS1573.1; uc001hsy.4	RefSeq; ENSEMBL; Havana transcript; ccdsGene; UCSC Genes	chr1	coding
TC1800006788.hg.1	-1.6731	0.359369	4161	MC5R	melanocortin 5 receptor	NM_005913; ENST00000324750; ENST00000589410; BC069153; BC069545; BC095531; OTTHUMT00000254638; OTTHUMT00000458893; CCDS11868.1; uc010xaf.3; uc060nrp.1	RefSeq; ENSEMBL; GenBank; Havana transcript; ccdsGene; UCSC Genes	chr18	coding
TC0300009855.hg.1	-1.673	0.238801	3556	IL1RAP	interleukin 1 receptor accessory protein	NM_001167928; NM_001167929; NM_001167930; NM_001167931; NM_002182; NM_134470; ENST00000072516; ENST00000317757; ENST00000342550; ENST00000412080; ENST00000412504; ENST00000413869; ENST00000422485; ENST00000422625; ENST00000422940; ENST00000434491; ENST00000439062; ENST00000443369; ENST00000447382; ENST00000453359; ENST00000461629; ENST00000465496; ENST00000473566; ENST00000482913; BC053621; OTTHU…	RefSeq; ENSEMBL; GenBank; Havana transcript; UCSC Genes; ccdsGene; lncRNAWiki; circbase; Ace View; RNACentral; NONCODE	chr3	coding
TC2000008824.hg.1	-1.67295	0.0898506	2307	FOXS1	forkhead box S1	NM_004118; ENST00000375978; BC013408; OTTHUMT00000078560; CCDS13192.1; uc002wwt.2; NONHSAT079322	RefSeq; ENSEMBL; GenBank; Havana transcript; ccdsGene; UCSC Genes; lncRNAWiki; NONCODE	chr20	coding
TC0400007988.hg.1	-1.6721	0.0105885	79725	THAP9	THAP domain containing 9	NM_024672; ENST00000302236; ENST00000505901; ENST00000506208; ENST00000509353; ENST00000514244; ENST00000514440; OTTHUMT00000252633; OTTHUMT00000363070; OTTHUMT00000363073; OTTHUMT00000363074; OTTHUMT00000363075; OTTHUMT00000363076; BC160017; CCDS3598.1; hsa_circ_0070255; THAP9.cAug10; uc003hnt.3; uc062xur.1; uc062xus.1; uc062xut.1; uc062xuu.1; uc062xuv.1; chr4_83825888_83831964	RefSeq; ENSEMBL; Havana transcript; GenBank; ccdsGene; circbase; Ace View; UCSC Genes; Guo	chr4	coding
TC0800011566.hg.1	-1.67204	0.339131		RAD21	Transcript Identified by AceView, Entrez Gene ID(s) 5885	RAD21.nAug10-unspliced	Ace View	chr8	ncrna
TC1900009984.hg.1	-1.67186	0.095465	23025	UNC13A	unc-13 homolog A (C. elegans)	NM_001080421; ENST00000252773; ENST00000517497; ENST00000519716; ENST00000523229; ENST00000550896; ENST00000551649; ENST00000552293; ENST00000601528; OTTHUMT00000376169; OTTHUMT00000376170; OTTHUMT00000376171; OTTHUMT00000403617; OTTHUMT00000403618; OTTHUMT00000403619; OTTHUMT00000465643; BC172223; CCDS46013.2; hsa_circ_0050023; hsa_circ_0050024; hsa_circ_0050025; hsa_circ_0050026; hsa_circ_00500…	RefSeq; ENSEMBL; Havana transcript; GenBank; ccdsGene; circbase; UCSC Genes; lncRNAWiki; NONCODE	chr19	coding
TC0500006479.hg.1	-1.67115	0.34144	85409	NKD2	naked cuticle homolog 2 (Drosophila)	NM_001271082; ENST00000274150; ENST00000296849; ENST00000513296; ENST00000519933; ENST00000523688; BC012176; OTTHUMT00000206720; OTTHUMT00000365550; OTTHUMT00000365552; OTTHUMT00000374690; OTTHUMT00000374691; NM_033120_2; CCDS3859.1; CCDS59486.1; uc003jbt.3; uc010itf.3; uc063byl.1; uc063bym.1; uc063byn.1; NONHSAT099953	RefSeq; ENSEMBL; GenBank; Havana transcript; ccdsGene; UCSC Genes; lncRNAWiki; NONCODE	chr5	coding
TC1900006522.hg.1	-1.67112	0.774372	90007	MIDN	midnolin	NM_177401; ENST00000300952; ENST00000586757; ENST00000586843; ENST00000590136; ENST00000591302; ENST00000591446; BC094778; OTTHUMT00000449964; OTTHUMT00000449965; OTTHUMT00000449966; OTTHUMT00000449967; OTTHUMT00000449968; CCDS32864.1; hsa_circ_0048210; hsa_circ_0048211; MIDN.aAug10; uc002lrp.4; uc060qxb.1; uc060qxc.1; uc060qxd.1; uc060qxe.1; uc060qxf.1; NONHSAT060241; NONHSAT060242	RefSeq; ENSEMBL; GenBank; Havana transcript; ccdsGene; circbase; Ace View; UCSC Genes; lncRNAWiki; NONCODE	chr19	coding
TC0300006925.hg.1	-1.67088	0.149159	7048	TGFBR2	transforming growth factor beta receptor II	NM_001024847; NM_003242; ENST00000295754; ENST00000359013; OTTHUMT00000252994; OTTHUMT00000341418; CCDS2648.1; CCDS33727.1; hsa_circ_0005224; hsa_circ_0064652; hsa_circ_0064653; hsa_circ_0064654; hsa_circ_0064655; hsa_circ_0064656; uc003cen.4; uc003ceo.4; NONHSAT088825	RefSeq; ENSEMBL; Havana transcript; ccdsGene; circbase; UCSC Genes; lncRNAWiki; NONCODE	chr3	coding
TC0100015299.hg.1	-1.67073	0.268392	54879	ST7L	suppression of tumorigenicity 7 like	NM_001308264; NM_017744; NM_138727; NM_138728; NM_138729; ENST00000343210; ENST00000358039; ENST00000360743; ENST00000361846; ENST00000369664; ENST00000369666; ENST00000369669; ENST00000418497; ENST00000459630; ENST00000463235; ENST00000466360; ENST00000467335; ENST00000470519; ENST00000470683; ENST00000473206; ENST00000477332; ENST00000477682; ENST00000479436; ENST00000480988; ENST00000485753; E…	RefSeq; ENSEMBL; GenBank; Havana transcript; ccdsGene; circbase; Ace View; UCSC Genes; lncRNAWiki; NONCODE	chr1	coding
TC0100017043.hg.1	-1.67054	0.157943	10446	LRRN2	leucine rich repeat neuronal 2	NM_006338; NM_201630; ENST00000367175; ENST00000367176; ENST00000367177; ENST00000496057; BC034047; BC068541; OTTHUMT00000087712; OTTHUMT00000089893; OTTHUMT00000089894; OTTHUMT00000089895; CCDS1448.1; LRRN2.aAug10-unspliced; LRRN2.dAug10; LRRN2.eAug10; uc001hbe.3; uc001hbf.3; uc021phy.3; uc057orh.1; NONHSAT008959	RefSeq; ENSEMBL; GenBank; Havana transcript; ccdsGene; Ace View; UCSC Genes; lncRNAWiki; NONCODE	chr1	coding
TC0100016112.hg.1	-1.67019	0.018463	8407	TAGLN2	transgelin 2	NM_001277223; NM_001277224; NM_003564; ENST00000320307; ENST00000368096; ENST00000368097; ENST00000397334; ENST00000478033; BC002616; BC009357; OTTHUMT00000059105; OTTHUMT00000059106; OTTHUMT00000059107; OTTHUMT00000059108; OTTHUMT00000097640; CCDS1189.1; CCDS60314.1; hsa_circ_0004617; hsa_circ_0014853; hsa_circ_0014854; hsa_circ_0014855; hsa_circ_0014856; hsa_circ_0014857; hsa_circ_0014858; hsa_…	RefSeq; ENSEMBL; GenBank; Havana transcript; ccdsGene; circbase; UCSC Genes; lncRNAWiki; NONCODE	chr1	coding
TC0100008094.hg.1	-1.67013	0.0127095	55182	RNF220	ring finger protein 220	NM_018150; ENST00000335497; ENST00000355387; ENST00000361799; ENST00000372247; ENST00000440132; ENST00000453863; ENST00000470498; ENST00000471494; ENST00000474064; ENST00000474394; ENST00000474956; ENST00000475378; ENST00000480686; ENST00000484745; ENST00000487332; ENST00000488865; ENST00000496262; ENST00000497469; BC034221; BC098266; BC098300; OTTHUMT00000020683; OTTHUMT00000021572; OTTHUMT00000…	RefSeq; ENSEMBL; GenBank; Havana transcript; ccdsGene; circbase; UCSC Genes; lncRNAWiki; NONCODE	chr1	coding
TC1600008971.hg.1	-1.66973	0.193668	339123	JMJD8	jumonji domain containing 8	NM_001005920; ENST00000412368; ENST00000562111; ENST00000562824; ENST00000563088; ENST00000564436; ENST00000565258; ENST00000565302; ENST00000566199; ENST00000567120; ENST00000567901; ENST00000568313; ENST00000568689; ENST00000569396; ENST00000569441; ENST00000570037; ENST00000609261; BC137100; BC137101; OTTHUMT00000421439; OTTHUMT00000421440; OTTHUMT00000421441; OTTHUMT00000421442; OTTHUMT000004…	RefSeq; ENSEMBL; GenBank; Havana transcript; ccdsGene; circbase; Ace View; UCSC Genes; lncRNAWiki; NONCODE	chr16	coding
TSUnmapped00000538.hg.1	-1.66969	0.0337281	8527	DGKD	diacylglycerol kinase, delta 130kDa	ENST00000630627	ENSEMBL		coding
TC1300008660.hg.1	-1.66962	0.347783	80209	PROSER1	proline and serine rich 1	NM_025138; ENST00000352251; ENST00000418503; ENST00000436678; ENST00000468017; ENST00000484434; ENST00000492646; ENST00000496138; ENST00000602512; ENST00000602534; ENST00000602899; ENST00000625998; BC064348; OTTHUMT00000044605; OTTHUMT00000044606; OTTHUMT00000044607; OTTHUMT00000044608; OTTHUMT00000044609; OTTHUMT00000044610; OTTHUMT00000044611; OTTHUMT00000467369; OTTHUMT00000467370; OTTHUMT0000…	RefSeq; ENSEMBL; GenBank; Havana transcript; ccdsGene; circbase; UCSC Genes; lncRNAWiki; NONCODE	chr13	coding
TC0100010387.hg.1	-1.66929	0.135799	4921	DDR2	discoidin domain receptor tyrosine kinase 2	NM_001014796; NM_006182; ENST00000367921; ENST00000367922; ENST00000415555; ENST00000433757; ENST00000446985; ENST00000458105; BC052998; OTTHUMT00000083213; OTTHUMT00000097650; OTTHUMT00000097651; OTTHUMT00000097652; OTTHUMT00000097927; OTTHUMT00000097928; CCDS1241.1; DDR2.eAug10; DDR2.fAug10; hsa_circ_0015055; hsa_circ_0015056; hsa_circ_0015057; hsa_circ_0015058; hsa_circ_0015059; hsa_circ_00150…	RefSeq; ENSEMBL; GenBank; Havana transcript; ccdsGene; Ace View; circbase; UCSC Genes; Guo; lncRNAWiki; NONCODE	chr1	coding
TC1200009489.hg.1	-1.66864	0.874741	57666	FBRSL1	fibrosin-like 1	NM_001142641; ENST00000434748; ENST00000536075; ENST00000537804; ENST00000539264; ENST00000542061; ENST00000542306; ENST00000543360; ENST00000543453; OTTHUMT00000397404; OTTHUMT00000397405; OTTHUMT00000397534; OTTHUMT00000397535; OTTHUMT00000397536; OTTHUMT00000397537; OTTHUMT00000397538; OTTHUMT00000397539; CCDS45010.1; hsa_circ_0002826; hsa_circ_0029482; hsa_circ_0029483; hsa_circ_0029484; hsa_…	RefSeq; ENSEMBL; Havana transcript; ccdsGene; circbase; UCSC Genes; lncRNAWiki; NONCODE	chr12	coding
TC1900011067.hg.1	-1.66848	0.453179	55260	TMEM143	transmembrane protein 143	NM_001303538; NM_001303539; NM_001303540; NM_018273; NR_130317; ENST00000293261; ENST00000377431; ENST00000435956; ENST00000593914; ENST00000595720; ENST00000597370; ENST00000598012; ENST00000598258; ENST00000598926; ENST00000599220; ENST00000600816; ENST00000601332; ENST00000601522; BC016919; OTTHUMT00000465622; OTTHUMT00000465623; OTTHUMT00000465624; OTTHUMT00000465625; OTTHUMT00000465626; OTTH…	RefSeq; ENSEMBL; GenBank; Havana transcript; ccdsGene; circbase; Ace View; UCSC Genes; lncRNAWiki; NONCODE	chr19	coding
TSUnmapped00000104.hg.1	-1.66804	0.0410215	338657	CCDC84	coiled-coil domain containing 84	ENST00000626123	ENSEMBL		coding
TC0600007384.hg.1	-1.66781	0.0381301	8348	HIST1H2BO	histone cluster 1, H2bo	NM_003527; ENST00000616182; BC106720; OTTHUMT00000040161; CCDS4640.1; uc003nkc.2	RefSeq; ENSEMBL; GenBank; Havana transcript; ccdsGene; UCSC Genes	chr6	coding
TC1700011366.hg.1	-1.66777	0.255649	57508	INTS2	integrator complex subunit 2	NM_020748; NR_026641; ENST00000251334; ENST00000444766; ENST00000578805; ENST00000583076; ENST00000583822; ENST00000584967; ENST00000617492; OTTHUMT00000445368; OTTHUMT00000445369; OTTHUMT00000445370; OTTHUMT00000445371; OTTHUMT00000445372; OTTHUMT00000445373; CCDS45750.1; hsa_circ_0000795; hsa_circ_0000796; hsa_circ_0002746; hsa_circ_0007064; hsa_circ_0007759; hsa_circ_0045027; hsa_circ_0045028;…	RefSeq; ENSEMBL; Havana transcript; ccdsGene; circbase; Ace View; UCSC Genes; Guo; lncRNAWiki; NONCODE	chr17	coding
TC0400008483.hg.1	-1.66763	0.181092	7368	UGT8	UDP glycosyltransferase 8	NM_001128174; NM_003360; ENST00000310836; ENST00000394511; ENST00000507710; BC075069; OTTHUMT00000256426; OTTHUMT00000363751; OTTHUMT00000363752; CCDS3705.1; uc003ibs.3; uc003ibt.3; uc062zei.1; UGT8.aAug10; chr4_115540578_115544858	RefSeq; ENSEMBL; GenBank; Havana transcript; ccdsGene; UCSC Genes; Ace View; Guo	chr4	coding
TC0100014276.hg.1	-1.66748	0.110374	1718	DHCR24	24-dehydrocholesterol reductase	NM_014762; ENST00000371269; ENST00000436604; ENST00000535035; BC004375; BC011669; OTTHUMT00000027680; OTTHUMT00000027681; CCDS600.1; hsa_circ_0012666; hsa_circ_0012667; hsa_circ_0012668; hsa_circ_0012669; hsa_circ_0012670; hsa_circ_0012671; hsa_circ_0012672; hsa_circ_0012673; hsa_circ_0012674; hsa_circ_0012675; hsa_circ_0012676; uc001cyc.2; uc057gvv.1; uc057gvw.1; lnc-DHCR24-1:1; NONHSAT003392	RefSeq; ENSEMBL; GenBank; Havana transcript; ccdsGene; circbase; UCSC Genes; lncRNAWiki; NONCODE	chr1	coding
TC0600008611.hg.1	-1.66725	0.0961181		SH3BGRL2	Transcript Identified by AceView, Entrez Gene ID(s) 83699	SH3BGRL2.mAug10-unspliced	Ace View	chr6	ncrna
TC0900009700.hg.1	-1.66711	0.0708208	3448	IFNA14	interferon, alpha 14	NM_002172; ENST00000380222; BC074956; BC104159; BC104160; OTTHUMT00000051894; CCDS6501.1; IFNA14.aAug10-unspliced; uc010mis.4	RefSeq; ENSEMBL; GenBank; Havana transcript; ccdsGene; Ace View; UCSC Genes	chr9	coding
TC0100014995.hg.1	-1.66688	0.0769276	1266	CNN3	calponin 3, acidic	NM_001286055; NM_001286056; NM_001839; ENST00000370206; ENST00000394202; ENST00000415017; ENST00000461018; ENST00000474409; ENST00000487539; ENST00000545882; BC025372; OTTHUMT00000029702; OTTHUMT00000029703; OTTHUMT00000029704; OTTHUMT00000029705; OTTHUMT00000029706; CCDS30775.1; CCDS65592.1; CCDS65593.1; hsa_circ_0000094; hsa_circ_0013243; hsa_circ_0013244; uc001dqz.6; uc010otv.3; uc010otx.3; uc…	RefSeq; ENSEMBL; GenBank; Havana transcript; ccdsGene; circbase; UCSC Genes; lncRNAWiki; NONCODE	chr1	coding
TC1500010730.hg.1	-1.66654	0.122375	25764	HYPK	huntingtin interacting protein K	NM_001199885; NM_016400; ENST00000406925; ENST00000442995; ENST00000458412; ENST00000497142; ENST00000498605; ENST00000620261; BC019262; OTTHUMT00000133492; OTTHUMT00000133495; OTTHUMT00000133496; OTTHUMT00000133497; OTTHUMT00000133876; CCDS10104.1; uc059inm.1; uc059inn.1; uc059inp.1; uc059inq.1; uc059inr.1; uc059ins.1	RefSeq; ENSEMBL; GenBank; Havana transcript; ccdsGene; UCSC Genes	chr15	coding
TC1200006959.hg.1	-1.66613	0.534174		PTPRO	Transcript Identified by AceView, Entrez Gene ID(s) 5800	PTPRO.mAug10-unspliced	Ace View	chr12	ncrna
TC0200008811.hg.1	-1.66568	0.126974	344558	SH3RF3	SH3 domain containing ring finger 3	NM_001099289; ENST00000309415; OTTHUMT00000331210; CCDS74557.1; hsa_circ_0003289; hsa_circ_0003523; hsa_circ_0056003; hsa_circ_0056004; hsa_circ_0056005; uc010ywt.2; chr2_109945679_109964405	RefSeq; ENSEMBL; Havana transcript; ccdsGene; circbase; UCSC Genes; Guo	chr2	coding
TC1100013127.hg.1	-1.66492	0.287617	387267	KRTAP5-4	keratin associated protein 5-4	NM_001012709; ENST00000399682; ENST00000616115; OTTHUMT00000127918; uc057xta.1; uc057xtb.1	RefSeq; ENSEMBL; Havana transcript; UCSC Genes	chr11	coding
TC0100015743.hg.1	-1.66474	0.313892	2029	ENSA	endosulfine alpha	NM_004436; NM_207042; NM_207043; NM_207044; NM_207045; NM_207046; NM_207047; NM_207168; ENST00000271690; ENST00000339643; ENST00000354702; ENST00000356527; ENST00000361532; ENST00000361631; ENST00000362052; ENST00000369014; ENST00000369016; ENST00000503241; ENST00000503345; ENST00000505321; ENST00000509582; ENST00000513281; BC000436; BC004461; BC068544; BC069208; OTTHUMT00000084720; OTTHUMT000000…	RefSeq; ENSEMBL; GenBank; Havana transcript; ccdsGene; Ace View; circbase; UCSC Genes; lncRNAWiki; NONCODE	chr1	coding
TC0100013700.hg.1	-1.66463	0.0417874	63967	CLSPN	claspin	NM_001190481; NM_022111; ENST00000251195; ENST00000318121; ENST00000373220; ENST00000466308; ENST00000517467; ENST00000520551; BC113116; BC115025; BC115026; BC137279; BC140789; OTTHUMT00000012014; OTTHUMT00000012210; OTTHUMT00000377651; OTTHUMT00000377652; OTTHUMT00000377857; OTTHUMT00000377858; CCDS396.1; CCDS53297.1; CLSPN.dAug10; hsa_circ_0003352; hsa_circ_0011583; hsa_circ_0011584; hsa_circ_0…	RefSeq; ENSEMBL; GenBank; Havana transcript; ccdsGene; Ace View; circbase; UCSC Genes; Guo; lncRNAWiki; NONCODE	chr1	coding
TC1300008691.hg.1	-1.66371	0.0535652		FOXO1	Memczak2013 ALT_ACCEPTOR, ALT_DONOR, coding, INTERNAL, intronic best transcript NM_002015	hsa_circ_0000476	circbase	chr13	ncrna
TC2000009028.hg.1	-1.66355	0.109975	140699	MROH8	maestro heat-like repeat family member 8	NM_152503; NM_213631; NM_213632; ENST00000343811; ENST00000400440; ENST00000400441; ENST00000417458; ENST00000421643; ENST00000422138; ENST00000434295; ENST00000466091; BC030006; BC057767; OTTHUMT00000079069; OTTHUMT00000079070; OTTHUMT00000079071; OTTHUMT00000079072; OTTHUMT00000079073; OTTHUMT00000079074; OTTHUMT00000280539; uc061wus.1; uc061wut.1; uc061wuu.1; uc061wuv.1; uc061wuw.1; uc061wux.1…	RefSeq; ENSEMBL; GenBank; Havana transcript; UCSC Genes; lncRNAWiki; NONCODE	chr20	coding
TC1400008478.hg.1	-1.66344	0.0537689	23241	PACS2	phosphofurin acidic cluster sorting protein 2	NM_001100913; NM_001243127; NM_015197; ENST00000325438; ENST00000430725; ENST00000447393; ENST00000546915; ENST00000547217; ENST00000547903; ENST00000548265; ENST00000548796; ENST00000549030; ENST00000550790; ENST00000551692; ENST00000551743; ENST00000551801; ENST00000552138; BC050351; BC065220; OTTHUMT00000409208; OTTHUMT00000409209; OTTHUMT00000409210; OTTHUMT00000409211; OTTHUMT00000409212; OT…	RefSeq; ENSEMBL; GenBank; Havana transcript; ccdsGene; circbase; Ace View; UCSC Genes; lncRNAWiki; NONCODE	chr14	coding
TC0300014086.hg.1	-1.66237	0.0409147	84239	ATP13A4	ATPase type 13A4	NM_032279; ENST00000295548; ENST00000342695; ENST00000392443; ENST00000400270; ENST00000428352; ENST00000437904; ENST00000450950; ENST00000474776; ENST00000482964; ENST00000490925; BC101496; OTTHUMT00000157240; OTTHUMT00000157241; OTTHUMT00000157242; OTTHUMT00000157243; OTTHUMT00000157244; OTTHUMT00000157245; OTTHUMT00000250871; OTTHUMT00000343023; OTTHUMT00000343024; OTTHUMT00000343025; ATP13A4.…	RefSeq; ENSEMBL; GenBank; Havana transcript; Ace View; ccdsGene; circbase; UCSC Genes; lncRNAWiki; NONCODE	chr3	coding
TC0100015660.hg.1	-1.66222	0.888662	644591	PPIAL4G	peptidylprolyl isomerase A (cyclophilin A)-like 4G	NM_001123068; ENST00000419275; OTTHUMT00000037969; CCDS41375.2; PPIAL4G.aAug10-unspliced; uc001ejt.4	RefSeq; ENSEMBL; Havana transcript; ccdsGene; Ace View; UCSC Genes	chr1	coding
TC0100010518.hg.1	-1.66208	0.323719	55827	DCAF6	DDB1 and CUL4 associated factor 6	NM_001017977; NM_001198956; NM_001198957; NM_018442; ENST00000312263; ENST00000367840; ENST00000367843; ENST00000432587; ENST00000450548; ENST00000455334; ENST00000460432; ENST00000470721; ENST00000470919; ENST00000478668; ENST00000489398; ENST00000491067; OTTHUMT00000083659; OTTHUMT00000083660; OTTHUMT00000083661; OTTHUMT00000083662; OTTHUMT00000083672; OTTHUMT00000083673; OTTHUMT00000097959; OT…	RefSeq; ENSEMBL; Havana transcript; ccdsGene; Ace View; circbase; UCSC Genes; Guo; lncRNAWiki; NONCODE	chr1	coding
TC1900008372.hg.1	-1.66206	0.0138104	5536	PPP5C	protein phosphatase 5, catalytic subunit	NM_001204284; NM_006247; ENST00000012443; ENST00000391919; ENST00000467502; ENST00000467902; ENST00000478046; ENST00000486994; ENST00000487483; ENST00000491003; ENST00000492109; ENST00000493347; ENST00000525507; ENST00000527193; ENST00000527623; ENST00000532058; ENST00000595055; BC001970; OTTHUMT00000258969; OTTHUMT00000258970; OTTHUMT00000258971; OTTHUMT00000258972; OTTHUMT00000258973; OTTHUMT00…	RefSeq; ENSEMBL; GenBank; Havana transcript; ccdsGene; circbase; UCSC Genes; Guo; lncRNAWiki; NONCODE	chr19	coding
TC1900011942.hg.1	-1.66156	0.231767	54938	SARS2	seryl-tRNA synthetase 2, mitochondrial	NM_001145901; NM_017827; ENST00000221431; ENST00000430193; ENST00000455102; ENST00000593754; ENST00000594171; ENST00000594259; ENST00000597490; ENST00000598343; ENST00000598563; ENST00000598598; ENST00000598831; ENST00000600042; ENST00000600448; ENST00000602034; BC042912; OTTHUMT00000463138; OTTHUMT00000463139; OTTHUMT00000463140; OTTHUMT00000463141; OTTHUMT00000463142; OTTHUMT00000463143; OTTHUM…	RefSeq; ENSEMBL; GenBank; Havana transcript; ccdsGene; Ace View; circbase; UCSC Genes; Guo; lncRNAWiki; NONCODE	chr19	coding
TC1900011789.hg.1	-1.66064	0.00905897	284361	EMC10	ER membrane protein complex subunit 10	NM_175063; NM_206538; ENST00000334976; ENST00000376918; ENST00000594508; ENST00000597426; ENST00000597799; ENST00000598585; ENST00000599293; ENST00000601780; BC032948; BC035001; OTTHUMT00000464759; OTTHUMT00000464760; OTTHUMT00000464761; OTTHUMT00000464762; OTTHUMT00000464764; OTTHUMT00000464765; OTTHUMT00000464766; OTTHUMT00000465245; C19orf63.gAug10; CCDS12796.1; CCDS42594.1; hsa_circ_0052023; …	RefSeq; ENSEMBL; GenBank; Havana transcript; Ace View; ccdsGene; circbase; UCSC Genes; lncRNAWiki; NONCODE	chr19	coding
[truncated: 20,406 more rows]
