# Supplementary material for: Ubenimex induces autophagy inhibition and EMT suppression to overcome cisplatin resistance in GC cells by perturbing the CD13/EMP3/PI3K/AKT/NF-κB axis
Source: publisher site journal article supplement (doi:10.18632/aging.102598), 2019-12-31
Supplement: Supplementary file [file aging-v12i1-102598-supplementary-material-SD2.pdf]

**SUPPLEMENTARY FIGURES**

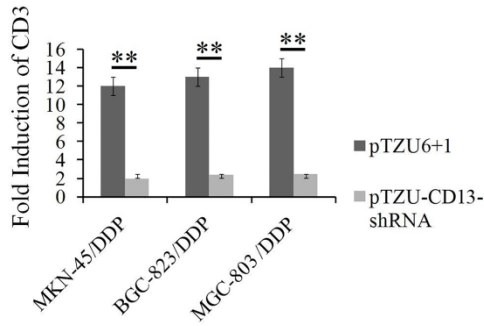

**Supplementary Figure 1. Quantitative study of CD13 mRNA expression in CDDP-resistant GC cells after CD13 knockdown.** CDDP-resistant GC cells were pre-stimulated with pTZU6+1 or pTZU-CD13-shRNA plasmids, Real-time PCR assay was performed to check the CD13 expression. The results are demonstrated as the representative of three independent experiments. \*\*P<0.01.

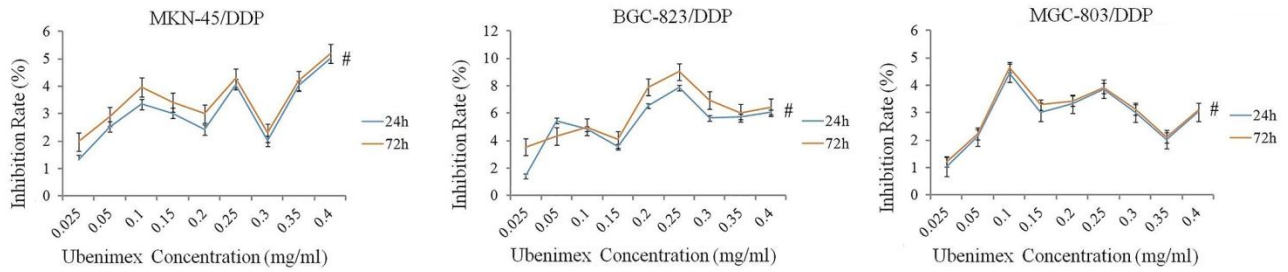

**Supplementary Figure 2. Ubenimex has no direct cytotoxicity on CDDP-resistant GC cells.** CDDP-resistant GC cells were treated with increasing concentrations of Ubenimex for 24h and 72h. Inhibition rate on cell growth was calculated by CCK-8 method. #P>0.05.

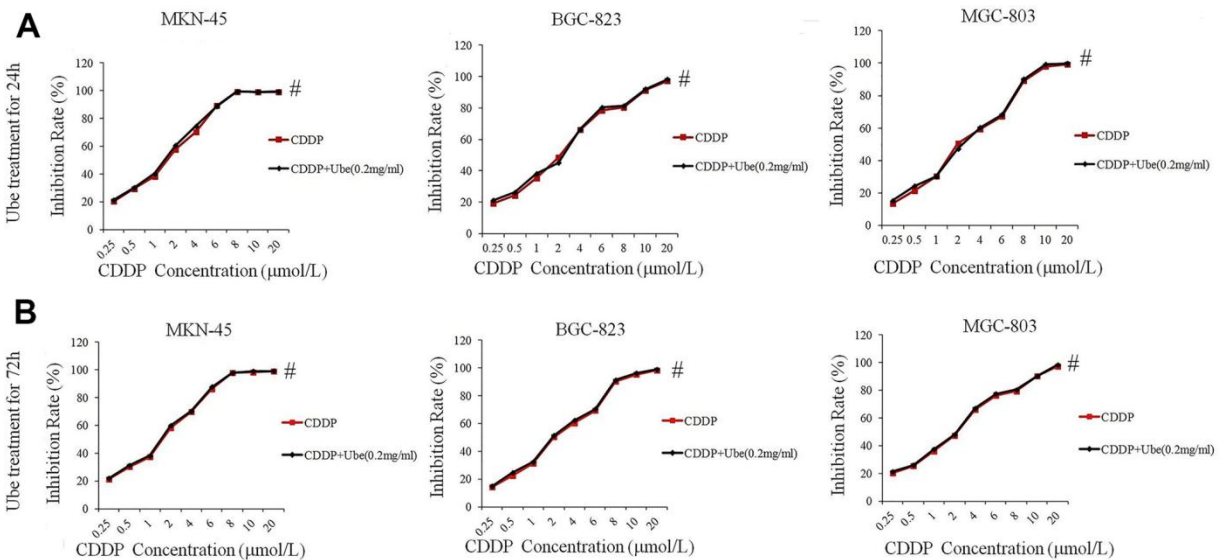

**Supplementary Figure 3. Ubenimex has no effect on cytotoxicity of CDDP towards parental GC cells.** GC cells were treated with or without Ubenimex (0.2mg/mL) for 24h and 72h, followed by incubation with CDDP at increasing concentrations (0.25, 0.5, 1, 2, 4, 6, 8, 10, and 20  $\mu$ mol/L) for 48h. Inhibition rate on cell growth was measured with CCK-8 method. #P>0.05.

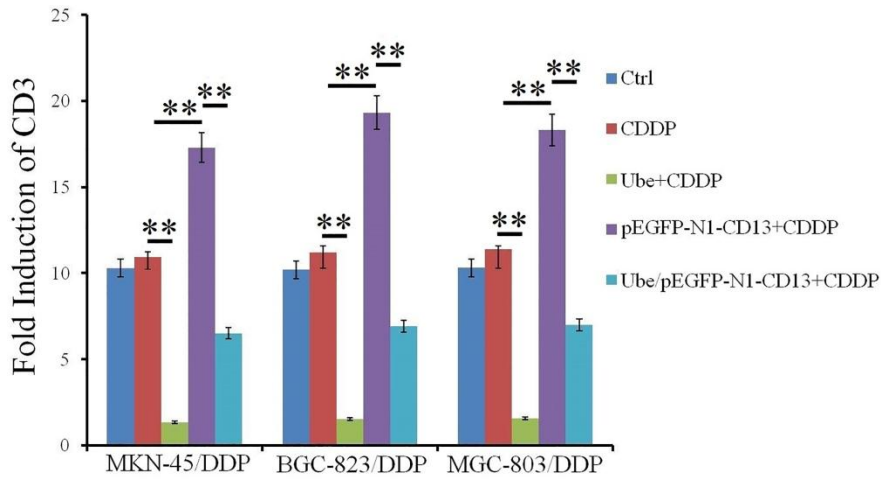

**Supplementary Figure 4. Quantitative study of CD13 mRNA expression in CDDP-resistant GC cells after Ubenimex treatment.** CDDP-resistant GC cells were pre-stimulated with indicated treatment as described in the Figure 3, and was prepared for Real-time PCR assay. The results are demonstrated as the representative of three independent experiments. \*\*P<0.01.

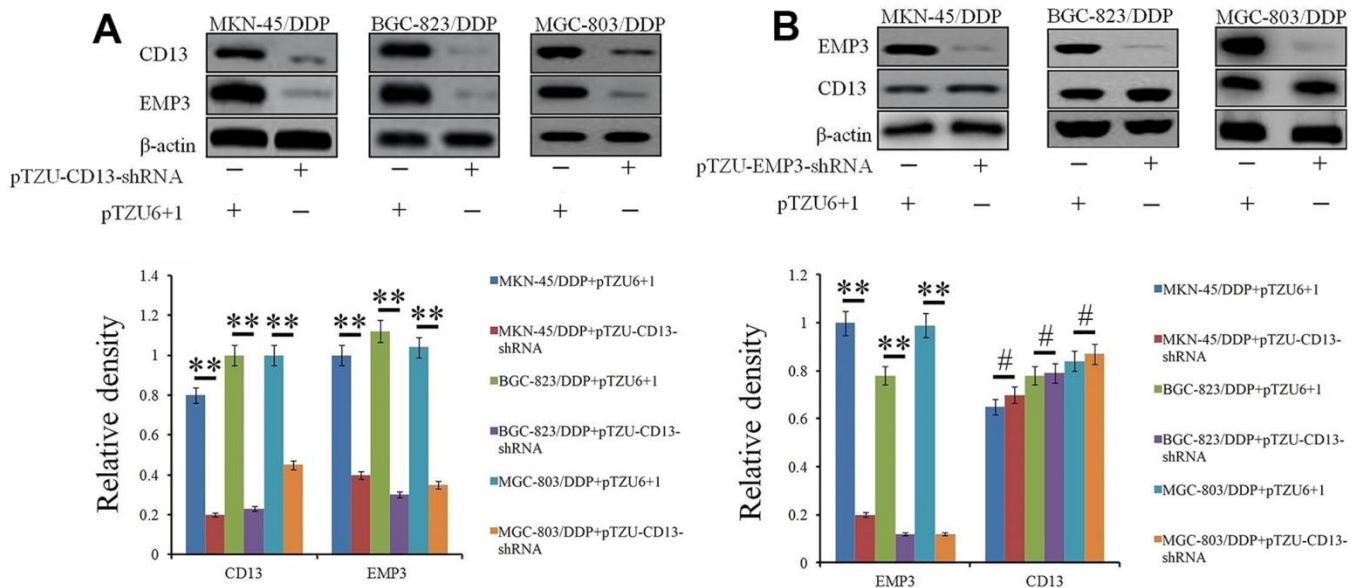

**Supplementary Figure 5. CD13 has a one-way regulatory effect on EMP3 expression.** (A) EMP3 expression was identified by Western blot assay in CDDP-resistant GC cells after CD13 was knockdown. (B) CD13 expression was determined by Western blot assay in CDDP-resistant GC cells after EMP3 was silenced. \*\*P<0.01 and #P>0.05.

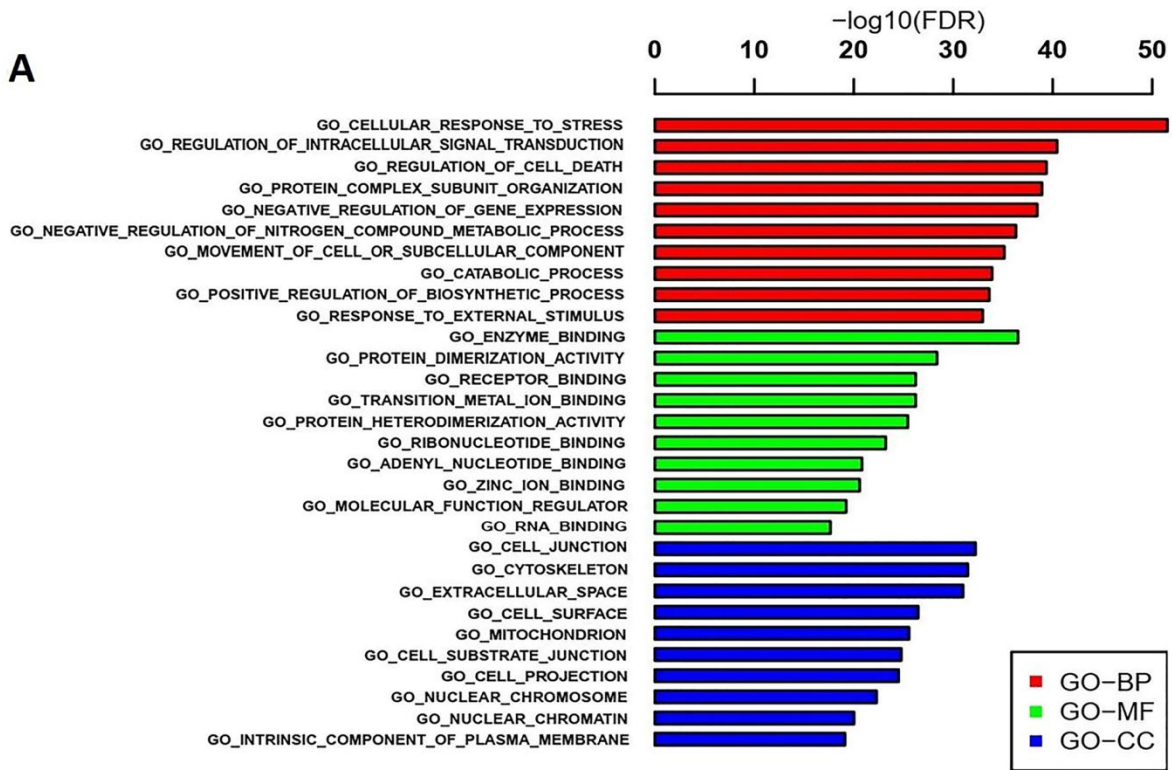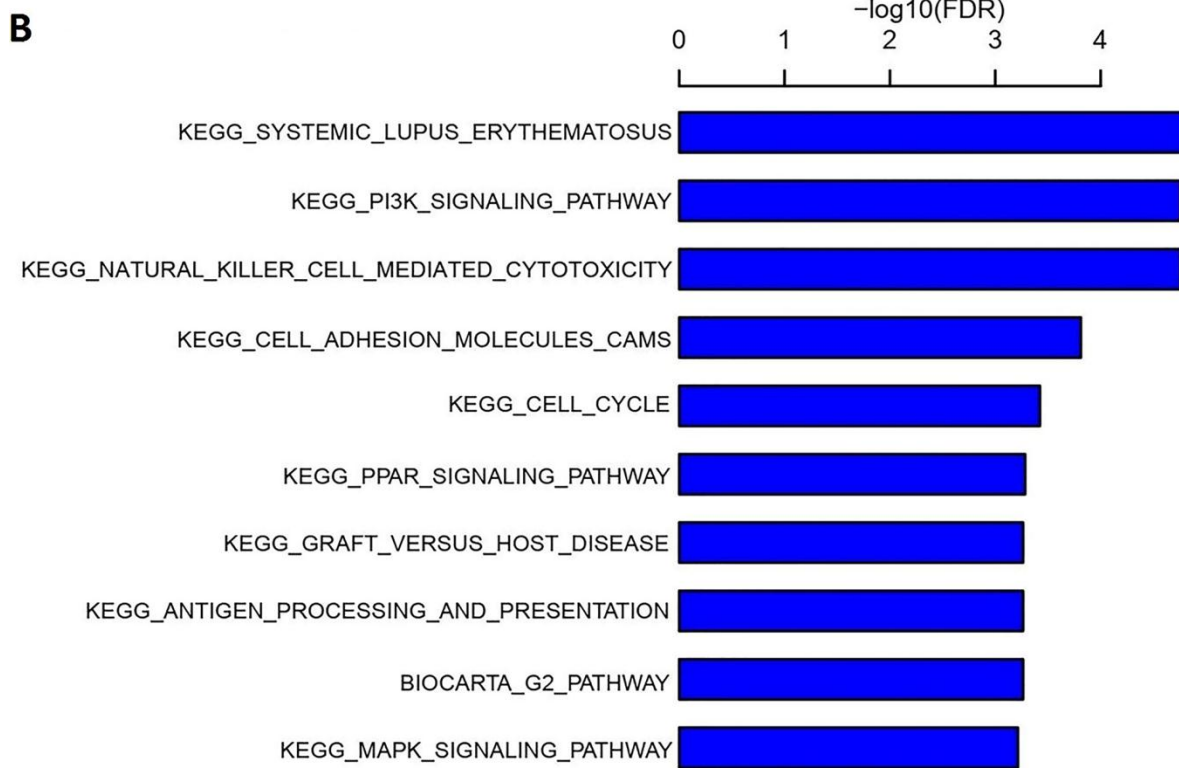

**Supplementary Figure 6. Gene function and pathway enrichment of differentially expressed genes (DEGs) were determined by GO and KEGG analysis. (A)** GO analysis was performed to evaluate the Biological Process (BP), Molecular Function (MF), and Cellular Component (CC) of these DEGs in Ubenimex- treated MKN-45/DDP cells, as described as the enrichment map of GO terms. **(B)** BioCarta or KEGG pathway analysis were carried out to clarify the pathway enrichment in these DEGs, as shown as the enrichment map of the top 10 over-represented canonical pathways following Ubenimex treatment.

| Gene Set Name            | Gene Symbol | Description                                                                           | Fold Change   |
|--------------------------|-------------|---------------------------------------------------------------------------------------|---------------|
| KEGG_PI3K_SIGNALING_PATH | NFKBIB      | NFKB Inhibitor , beta                                                                 | 1.344551077   |
| KEGG_PI3K_SIGNALING_PATH | NKRF        | NFKB repressing factor                                                                | 8.406317901   |
| KEGG_PI3K_SIGNALING_PATH | PIK3R1      | phosphoinositide-3-Kinase Regulatory Subunit 1                                        | -12.908943940 |
| KEGG_PI3K_SIGNALING_PATH | PIK3C2B     | phosphatidylinositol-4-phosphate 3-kinase, catalytic subunit type 2 beta              | -1.384418211  |
| KEGG_PI3K_SIGNALING_PATH | PIK3R3      | phosphoinositide-3-kinase, regulatory subunit 3 (gamma)                               | -1.181440701  |
| KEGG_PI3K_SIGNALING_PATH | PIK3CB      | phosphatidylinositol-4,5-bisphosphate 3-kinase, catalytic subunit beta                | -1.116603143  |
| KEGG_PI3K_SIGNALING_PATH | PIK3CG      | phosphatidylinositol-4,5-bisphosphate 3-kinase, catalytic subunit gamma               | -1.382075605  |
| KEGG_PI3K_SIGNALING_PATH | PIK3C2A     | phosphatidylinositol-4-phosphate 3-kinase, catalytic subunit type 2 alpha             | -1.176025937  |
| KEGG_PI3K_SIGNALING_PATH | PIK3CD      | phosphatidylinositol-4,5-bisphosphate 3-kinase, catalytic subunit delta               | -1.012538491  |
| KEGG_PI3K_SIGNALING_PATH | PIK3CA      | phosphatidylinositol-4,5-bisphosphate 3-kinase, catalytic subunit alpha               | -1.416046764  |
| KEGG_PI3K_SIGNALING_PATH | PIK3R5      | phosphoinositide-3-kinase, regulatory subunit 5                                       | -1.259684137  |
| KEGG_PI3K_SIGNALING_PATH | PIK3IP1     | phosphoinositide-3-kinase interacting protein 1                                       | 1.475801979   |
| KEGG_PI3K_SIGNALING_PATH | PIK3C2G     | phosphatidylinositol-4-phosphate 3-kinase, catalytic subunit type 2 gamma             | -1.206000268  |
| KEGG_PI3K_SIGNALING_PATH | PIK3R6      | phosphoinositide-3-kinase, regulatory subunit 6                                       | -1.107038243  |
| KEGG_PI3K_SIGNALING_PATH | PIK3AP1     | phosphoinositide-3-kinase adaptor protein 1                                           | -1.170605016  |
| KEGG_PI3K_SIGNALING_PATH | PIK3R4      | phosphoinositide-3-kinase, regulatory subunit 4                                       | -1.245926519  |
| KEGG_PI3K_SIGNALING_PATH | NFKB2       | nuclear factor of kappa light polypeptide gene enhancer in B-cells 2 (p49/p100)       | -1.189951472  |
| KEGG_PI3K_SIGNALING_PATH | NKAP        | NFKB activating protein                                                               | -4.987823698  |
| KEGG_PI3K_SIGNALING_PATH | NKIRAS2     | NFKB inhibitor interacting Ras-like 2                                                 | 1.383398614   |
| KEGG_PI3K_SIGNALING_PATH | NKAPL       | NFKB activating protein-like                                                          | -1.392148168  |
| KEGG_PI3K_SIGNALING_PATH | NFKBIA      | NFKB Inhibitor Alpha                                                                  | 9.558331407   |
| KEGG_PI3K_SIGNALING_PATH | NFKB1       | nuclear factor of kappa light polypeptide gene enhancer in B-cells 1                  | -1.810258653  |
| KEGG_PI3K_SIGNALING_PATH | RELA        | nuclear factor NF-kappa-B p65 subunit, Transcription factor p65                       | -10.434542180 |
| KEGG_PI3K_SIGNALING_PATH | NFKBIE      | nuclear factor of kappa light polypeptide gene enhancer in B-cells inhibitor, epsilon | 1.347048682   |
| KEGG_PI3K_SIGNALING_PATH | NFKBID      | nuclear factor of kappa light polypeptide gene enhancer in B-cells inhibitor, delta   | 1.382075605   |
| KEGG_PI3K_SIGNALING_PATH | MTOR        | mechanistic target of rapamycin (serine/threonine kinase)                             | -1.797650315  |
| KEGG_PI3K_SIGNALING_PATH | GSKIP       | GSK3B interacting protein                                                             | -1.848404711  |
| KEGG_PI3K_SIGNALING_PATH | GSK3A       | glycogen synthase kinase 3 alpha                                                      | 1.101603517   |
| KEGG_PI3K_SIGNALING_PATH | GSK3B       | glycogen synthase kinase 3 beta                                                       | 2.267654591   |
| KEGG_PI3K_SIGNALING_PATH | IKKBK       | inhibitor of kappa light polypeptide gene enhancer in B-cells, kinase beta            | -1.609856482  |
| KEGG_PI3K_SIGNALING_PATH | IKBKG       | inhibitor of kappa light polypeptide gene enhancer in B-cells, kinase gamma           | -1.739533094  |
| KEGG_PI3K_SIGNALING_PATH | IKBKE       | inhibitor of kappa light polypeptide gene enhancer in B-cells, kinase epsilon         | -1.895365326  |
| KEGG_PI3K_SIGNALING_PATH | AKT1        | RAC-alpha serine/threonine-protein kinase                                             | -11.554549540 |
| KEGG_PI3K_SIGNALING_PATH | AKT2        | AKT serine/threonine kinase 2;PKB beta                                                | -6.545451724  |
| KEGG_PI3K_SIGNALING_PATH | AKT3        | AKT serine/threonine kinase 3;PKB gamma                                               | -1.232389998  |
| KEGG_PI3K_SIGNALING_PATH | AKTIP       | AKT interacting protein                                                               | -1.257153923  |

Supplementary Figure 7. Details for the differentially expressed genes that were enriched in PI3K signaling pathway.
